# Supplementary material
Source: PubMed Central journal article supplement (PMC2785454)

**Supporting Information**  
for  
**Studies for the Synthesis of Xenicane Diterpenes.  
A Stereocontrolled Total Synthesis of  
4-Hydroxydictyolactone**

David R. Williams<sup>\*1</sup>, Martin J. Walsh<sup>1</sup>, Nathan A. Miller<sup>1</sup>

*<sup>1</sup>Department of Chemistry, Indiana University  
800 E. Kirkwood Ave., Bloomington, IN 47405-7102*

[\\*williamd@indiana.edu](mailto:williamd@indiana.edu)

|                                                                                                   | <u>Page</u> |
|---------------------------------------------------------------------------------------------------|-------------|
| 1) General Information                                                                            | S-2         |
| 2) Experimental Procedures                                                                        | S-4         |
| 3) Comparison of <sup>1</sup> H and <sup>13</sup> C NMR spectra of natural and synthetic <b>4</b> | S-44        |
| 4) References                                                                                     | S-45        |
| 5) <sup>1</sup> H and <sup>13</sup> C NMR of Synthesized Compounds                                | S-46        |

## General Information

Optical rotations were obtained on a Perkin Elmer 241 polarimeter at 589 nm (sodium D line) using a 10 cm path length and a 1.0 mL volume. Concentrations (c) are given in g/100 mL. Infrared spectra were recorded on a Nicolet Avatar 360 spectrometer and are reported in wavenumbers ( $\text{cm}^{-1}$ ). Proton nuclear magnetic resonance ( $^1\text{H}$  NMR) spectra were measured on a Varian VXR-400 (400 MHz) or a Varian INOVA-400 (400 MHz). Carbon nuclear magnetic resonance ( $^{13}\text{C}$  NMR) spectra were measured on a VXR-400 (101 MHz) or an INOVA-400 (101 MHz).  $^1\text{H}$  NMR and  $^{13}\text{C}$  NMR spectra were acquired as solutions in  $\text{CDCl}_3$  and are reported in parts per million (ppm) downfield ( $\delta$ ) from tetramethylsilane using residual chloroform ( $\text{CHCl}_3$ ) as an internal standard set to  $\delta$  7.26 and  $\delta$  77.00, respectively. Proton NMR data are reported in the form:  $\delta$  (multiplicity, coupling constants, number of protons). Mass spectral data (MS and HRMS) were recorded on a Kratos MS-80 RFA mass spectrometer by use of chemical ionization (CI) with methane or electron impact (EI).

Analytical thin-layer chromatography (TLC) was performed using glass-backed 0.25 mm thickness silica gel 60 ( $\text{F}_{254}$ ) plates (EM Science) which were visualized under UV light and/or staining with ethanolic *p*-anisaldehyde. Flash chromatography was performed using Merck silica gel 60 (Kieselgel 60) (E. M. Science; 230–400 mesh ASTM) or similar products from Whatman Scientific or Sorbent Technologies and pressure was obtained using an airline bleed.

All reagents and solvents were reagent grade and used as received unless noted otherwise. Bulk grade hexanes and ethyl acetate (EtOAc) for chromatography were distilled before use. Diethyl ether ( $\text{Et}_2\text{O}$ ) and tetrahydrofuran (THF) were distilled under nitrogen from sodium/benzophenone ketyl immediately before use. Methylene chloride ( $\text{CH}_2\text{Cl}_2$ ),

diisopropylethylamine (DIPEA) and triethylamine (Et<sub>3</sub>N) were distilled from CaH<sub>2</sub> under dry air immediately before use.

Unless otherwise noted, all reactions were conducted in flame or oven-dried glassware under an atmosphere of argon. All non-volatile samples were pumped to a constant weight under high vacuum (0.1–0.2 mmHg) at ambient temperature following removal of solvents by rotary evaporation.

## Experimental Procedures

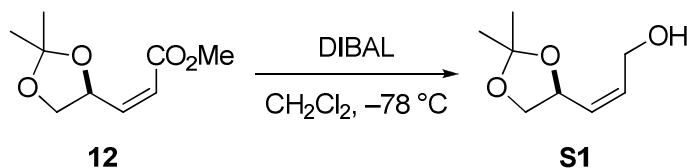

**(S,Z)-3-(2,2-Dimethyl-1,3-dioxolan-4-yl)prop-2-en-1-ol (S1)** Allylic alcohol **S1** was prepared according to the procedure described by Marshall and coworkers.<sup>1</sup> To a solution of **12** (26.43 g, 142.03 mmol) in CH<sub>2</sub>Cl<sub>2</sub> (710 mL) at -78 °C, DIBAL (1.0 M in hexanes, 327 mL, 327 mmol) was slowly added. The reaction stirred for 1.5 h and was quenched at -78 °C with the addition of a saturated aqueous solution of sodium potassium tartrate (700 mL). The resulting mixture warmed to room temperature and stirred overnight. The layers were separated and the aqueous layer was extracted with CH<sub>2</sub>Cl<sub>2</sub>. The organic extracts were combined, dried over anhydrous Na<sub>2</sub>SO<sub>4</sub>, filtered and concentrated to give a colorless oil. Crude product was purified via flash chromatography (Hexanes/EtOAc (5:2)) providing **S1** (22.13 g, 98%) as a clear oil: *R<sub>f</sub>* 0.23 (Hexanes/EtOAc (1:1)); [α]<sub>D</sub><sup>22</sup> +14.1° (c 1.18, CHCl<sub>3</sub>); IR (film) 3404, 2987, 2358, 1372, 1215, 1156, 1059 cm<sup>-1</sup>; <sup>1</sup>H NMR (400 MHz, CDCl<sub>3</sub>) δ 5.78–5.69 (m, 1H), 5.47 (dt, *J* = 9.4, 1.6 Hz, 1H), 4.78 (m, 1H), 4.24–4.15 (m, 1H), 4.12–4.04 (m, 1H), 4.02 (dd, *J* = 7.8, 6.3 Hz, 1H), 3.48 (dd, *J* = 8.6, 7.8 Hz, 1H), 3.00–2.86 (m, 1H), 1.35 (s, 3H), 1.31 (s, 3H); <sup>13</sup>C NMR (101 MHz, CDCl<sub>3</sub>) δ 135.1, 129.0, 109.2, 71.7, 69.3, 58.1, 26.5, 25.7; HRMS-CI (calcd. for C<sub>8</sub>H<sub>15</sub>O<sub>3</sub> [M+H]<sup>+</sup>) 159.1016, found 159.1016.

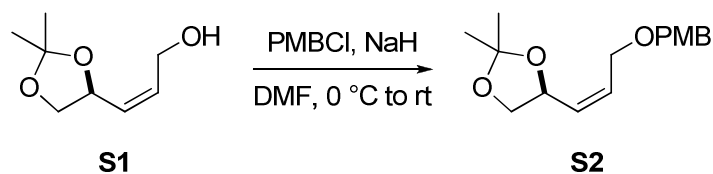

**(S,Z)-4-(3-(4-Methoxybenzyloxy)prop-1-enyl)-2,2-dimethyl-1,3-dioxolane (S2)** To a solution of **S1** (19.50 g, 123.27 mmol) in DMF (615 mL) at 0 °C was added NaH (60% suspension in mineral oil, 5.92 g, 147.92 mmol). The mixture was stirred vigorously for 30 minutes and PMBCl (18.50 mL, 135.60 mmol) was then added dropwise. The solution was allowed to warm to ambient temperature with stirring overnight. The reaction was quenched with H<sub>2</sub>O and was diluted in Et<sub>2</sub>O. Aqueous layer was extracted with Et<sub>2</sub>O (3 x 750 mL) and combined organic extracts were washed with saturated aqueous NH<sub>4</sub>Cl and brine. Organic extracts were dried over MgSO<sub>4</sub>, filtered and concentrated *in vacuo* to give a yellow oil. Crude product was purified via flash chromatography (Hexanes/EtOAc (17:3)), providing **S2** (33.26 g, 97%) as a clear oil: R<sub>f</sub> 0.52 (Hexanes/EtOAc (3:1)); [α]<sub>D</sub><sup>23</sup> -9.8° (c 1.04, CHCl<sub>3</sub>); IR (film) 2985, 2360, 2340, 1513, 1248, 1059 cm<sup>-1</sup>; <sup>1</sup>H NMR (400 MHz, CDCl<sub>3</sub>) δ 7.31–7.24 (m, 2H), 6.92–6.86 (m, 2H), 5.89–5.74 (m, 1H), 5.71–5.55 (m, 1H), 4.81 (dd, *J* = 15.1, 7.7 Hz, 1H), 4.46 (d, *J* = 11.5 Hz, 1H), 4.44 (d, *J* = 11.5 Hz, 1H), 4.09 (dd, *J* = 6.4, 1.3 Hz, 2H), 4.05 (dd, *J* = 8.1, 6.2 Hz, 1H), 3.81 (s, 3H), 3.55 (app. t, *J* = 8.0 Hz, 1H), 1.43 (s, 3H), 1.39 (s, 3H); <sup>13</sup>C NMR (101 MHz, CDCl<sub>3</sub>) δ 159.2, 130.6, 130.5, 130.0, 129.3 (2 C), 113.7 (2 C), 109.2, 71.9, 71.8, 69.3, 65.1, 55.1, 26.6, 25.8; HRMS-CI (calcd. for C<sub>16</sub>H<sub>21</sub>O<sub>4</sub> [M-H]) 277.1434, found 277.1433.

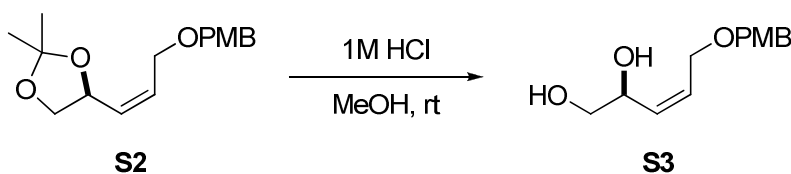

**(S,Z)-5-(4-Methoxybenzyloxy)pent-3-ene-1,2-diol (S3)** To a solution of **S2** (33.26 g, 119.49 mmol) in MeOH (400 mL) was added HCl (1.0 M in H<sub>2</sub>O, 200 mL, 200 mmol). The reaction was allowed to stir for 3 h and was then neutralized with the slow addition of NaOH (1.0 M in H<sub>2</sub>O, 200 mL, 200 mmol). The solution was extracted with CH<sub>2</sub>Cl<sub>2</sub> (4 x 500 mL) and combined organic extracts were dried over anhydrous MgSO<sub>4</sub>, filtered and concentrated *in vacuo* to give an opaque oil. Crude product was purified via flash chromatography (Et<sub>2</sub>O/MeOH (40:1)), providing **S3** (28.46 g, 100%) as a white solid: *R<sub>f</sub>* 0.11 (Hexanes/EtOAc (1:3)); [ $\alpha$ ]<sub>D</sub><sup>21</sup> +4.5° (c 0.91, CHCl<sub>3</sub>); IR (film) 3386 (br), 2932, 2862, 1612, 1514, 1249, 1073, 1033 cm<sup>-1</sup>; <sup>1</sup>H NMR (400 MHz, CDCl<sub>3</sub>)  $\delta$  7.30–7.24 (m, 2H), 6.92–6.86 (m, 2H), 5.84–5.76 (m, 1H), 5.67–5.58 (m, 1H), 4.53–4.44 (m, 3H), 4.14 (ddd, *J* = 12.4, 6.3, 1.1 Hz, 1H), 4.05 (ddd, 12.4, 5.9, 0.9 Hz, 1H), 3.82 (s, 3H), 3.64–3.55 (m, 1H), 3.55–3.47 (m, 1H), 2.59 (br. s, 1H), 2.03 (br. s, 1H); <sup>13</sup>C (101 MHz, CDCl<sub>3</sub>)  $\delta$  159.2, 131.9, 129.6, 129.4 (2 C), 129.2, 113.7 (2 C), 72.1, 68.6, 65.9, 65.4, 55.1; HRMS-Cl (calcd. for C<sub>13</sub>H<sub>19</sub>O<sub>4</sub> [M+H]<sup>+</sup>) 239.1273, found 239.1278

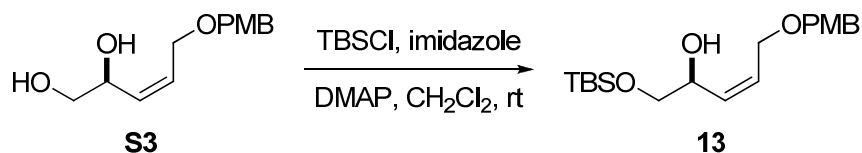

**(S,Z)-1-(tert-Butyldimethylsilyloxy)-5-(4-methoxybenzyloxy)pent-3-en-2-ol (13)** To a solution of **S3** (25.73 g, 107.98 mmol) in CH<sub>2</sub>Cl<sub>2</sub> (540 mL) at 0 °C was added imidazole (9.56 g, 140.48 mmol), followed by TBSCl (16.27 g, 107.98 mmol). The mixture was allowed to slowly warm to room temperature and was stirred for an additional 8 h. The reaction was quenched with the addition of saturated aqueous NaHCO<sub>3</sub> and aqueous layer was extracted with CH<sub>2</sub>Cl<sub>2</sub> (3 x 500 mL). The combined organic extracts were dried over anhydrous MgSO<sub>4</sub>, filtered and

concentrated *in vacuo* to give a clear oil. The crude product was purified via flash chromatography (Hexanes/EtOAc (17:3)), providing **13** (35.48 g, 93%) as a clear oil:  $R_f$  0.26 (Hexanes/EtOAc (3:1));  $[\alpha]_D^{24} +22.8^\circ$  (c. 0.98,  $\text{CHCl}_3$ ); IR (film) 3430 (br), 2928, 2856, 1613, 1513, 1464, 1249, 1073  $\text{cm}^{-1}$ ;  $^1\text{H}$  NMR (400 MHz,  $\text{CDCl}_3$ )  $\delta$  7.29–7.24 (m, 2H), 6.91–6.85 (m, 2H), 5.81–5.72 (m, 1H), 5.60–5.52 (m, 1H), 4.45–4.38 (m, 3H), 4.16–4.04 (m, 2H), 3.81 (s, 3H), 3.56 (dd,  $J = 10.0, 3.9$  Hz, 1H), 3.45 (dd,  $J = 10.0, 8.0$  Hz, 1H), 2.63 (d,  $J = 2.8$  Hz, 1H), 0.90 (s, 9H), 0.07 (s, 6H);  $^{13}\text{C}$  NMR (101 MHz,  $\text{CDCl}_3$ ),  $\delta$  159.2, 131.4, 130.1, 129.9, 129.4 (2 C), 113.8 (2 C), 72.0, 68.5, 66.8, 65.6, 55.2, 25.8 (3 C), 18.3, –5.3, –5.4; HRMS-CI (calcd. for  $\text{C}_{19}\text{H}_{33}\text{O}_4\text{Si}$   $[\text{M}+\text{H}]^+$ ) 353.2143, found 353.2154.

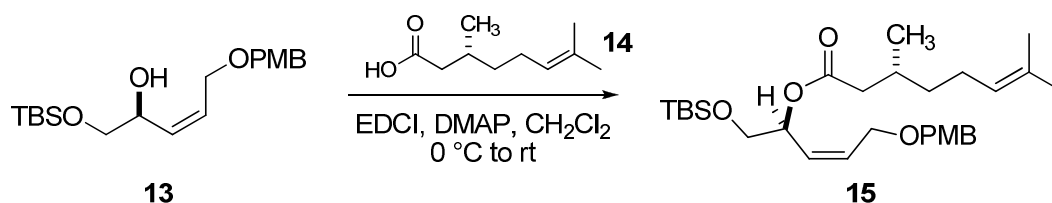

**(R)-((S,Z)-1-(tert-Butyldimethylsilyloxy)-5-(4-methoxybenzyloxy)pent-3-en-2-yl) 3,7-dimethyloct-6-enoate (15)** To a solution of **13** (28.24 g, 80.10 mmol) in  $\text{CH}_2\text{Cl}_2$  (400 mL) was added (*R*)-citronellic acid (**14**) (15.00 g, 88.11 mmol). The solution was chilled to 0 °C and EDCI (46.07 g, 240.3 mmol) was added, followed by DMAP (11.74 g, 96.12 mmol). The reaction was allowed to slowly warm to ambient temperature with stirring overnight. Saturated aqueous  $\text{NH}_4\text{Cl}$  (400 mL) was added and the layers were separated. The aqueous layer was extracted with  $\text{Et}_2\text{O}$  and combined organic extracts were dried over anhydrous  $\text{MgSO}_4$ , filtered and concentrated *in vacuo* to afford a slightly yellow oil. The crude product was purified via flash chromatography, (Hexanes/EtOAc (19:1)), providing **15** (39.15 g, 97%) as a clear oil:  $R_f$  0.68 (Hexanes/EtOAc (3:1));  $[\alpha]_D^{23} -22.4^\circ$  (c 0.91,  $\text{CHCl}_3$ ); IR (film) 2928, 2856, 1736, 1513,

1249  $\text{cm}^{-1}$ ;  $^1\text{H}$  NMR (400 MHz,  $\text{CDCl}_3$ )  $\delta$  7.30–7.24 (m, 2H), 6.91–6.84 (m, 2H), 5.80 (dt,  $J = 11.7, 6.3$  Hz, 1H), 5.60–5.53 (m, 1H), 5.52–5.46 (m, 1H), 5.13–5.05 (m, 1H), 4.45 (d,  $J = 11.4$  Hz, 1H), 4.44 (d,  $J = 11.4$  Hz, 1H), 4.25–4.14 (m, 2H), 3.79 (s, 3H), 3.69 (dd,  $J = 10.9$  Hz, 7.0 Hz, 1H), 3.63 (dd,  $J = 10.9, 4.7$  Hz, 1H), 2.30 (dd,  $J = 14.9, 6.3$  Hz, 1H), 2.11 (dd,  $J = 14.9, 8.6$  Hz, 1H), 2.06–1.90 (m, 3H), 1.68 (s, 3H), 1.60 (s, 3H), 1.41–1.30 (m, 1H), 1.29–1.15 (m, 1H), 0.94 (d,  $J = 6.6$  Hz, 3H), 0.88 (s, 9H), 0.05 (s, 6H);  $^{13}\text{C}$  NMR (101 MHz,  $\text{CDCl}_3$ )  $\delta$  172.2, 159.1, 131.7, 131.3, 130.2, 129.3 (2 C), 127.5, 124.2, 113.7 (2 C), 72.0, 70.7, 66.0, 64.6, 55.1, 41.9, 36.7, 30.0, 25.7 (3 C), 25.6, 25.3, 19.5, 18.2, 17.5, –5.5 (2 C); HRMS-Cl (calcd. for  $\text{C}_{29}\text{H}_{47}\text{O}_5\text{Si}$   $[\text{M}-\text{H}]^+$ ) 503.3187, found 503.3208.

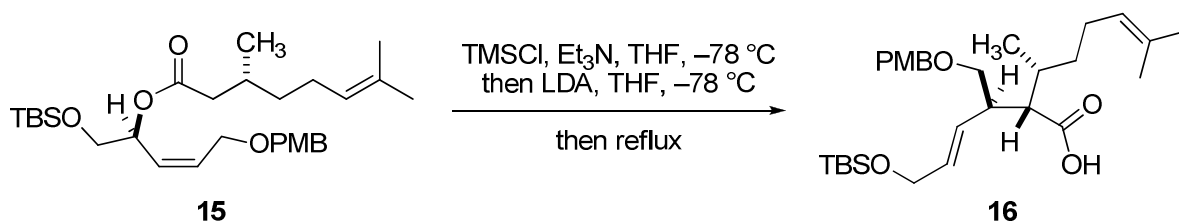

**(2S,3R)-2-((R,E)-6-(tert-Butyldimethylsilyloxy)-1-(4-methoxybenzyloxy)hex-4-en-2-yl)-3,7-dimethyloct-6-enoic acid (16)** To a solution of **15** (1.02 g, 2.02 mmol) in THF (40 mL) at  $-78$   $^\circ\text{C}$  was added a premixed solution of  $\text{Et}_3\text{N}$  (1.30 mL, 9.09 mmol) and  $\text{TMSCl}$  (1.30 mL, 10.10 mmol). The solution was allowed to stir for 5 min and then a solution of  $\text{LDA}$  (1.0 M in THF, 3.03 mL, 3.03 mmol) was pre-cooled to  $-78$   $^\circ\text{C}$  and was added dropwise via cannula. The reaction was allowed to stir for 90 min and then at ambient temperature for 2 h. Additional THF (20 mL) was added, and the reaction was heated to reflux for 2 h. The solution was cooled to ambient temperature and diluted in  $\text{EtOAc}$  (50 mL) and brine (50 mL). The layers were separated and the aqueous layer was extracted with  $\text{EtOAc}$  (3 x 25 mL). The combined organic extracts were dried over anhydrous  $\text{Na}_2\text{SO}_4$ , filtered and concentrated *in vacuo*. The crude



product was purified via flash chromatography, (Hexanes/EtOAc (9:1 to 4:1)), providing **16** (871 mg, 85%) as a clear oil:  $R_f$  0.09 (Hexanes/EtOAc (17:3));  $[\alpha]_D^{22} +11.6^\circ$  (c 1.01,  $\text{CHCl}_3$ ); IR (film) 2956, 2929, 2856, 1703, 1514, 1249  $\text{cm}^{-1}$ ;  $^1\text{H}$  NMR (400 MHz,  $\text{CDCl}_3$ )  $\delta$  7.27–7.22 (m, 2H), 6.89–6.84 (m, 2H), 5.73 (dd,  $J = 15.5, 8.9$  Hz, 1H), 5.65 (dt,  $J = 15.4, 4.8$  Hz, 1H), 5.11–5.03 (m, 1H), 4.43 (d,  $J = 11.5$  Hz, 1H), 4.40 (d,  $J = 11.6$  Hz, 1H), 4.19–4.07 (m, 2H), 3.80 (s, 3H), 3.49–3.38 (m, 2H), 2.79–2.71 (m, 1H), 2.59 (t,  $J = 7.2$  Hz, 1H), 2.08–1.88 (m, 2H), 1.87–1.73 (m, 1H), 1.67 (s, 3H), 1.60 (s, 3H), 1.54–1.42 (m, 1H), 1.22–1.10 (m, 1H), 0.94 (d,  $J = 6.7$  Hz, 3H), 0.89 (s, 9H), 0.05 (s, 6H);  $^{13}\text{C}$  NMR (101 MHz,  $\text{CDCl}_3$ )  $\delta$  179.3, 159.1, 132.4, 131.5, 130.3, 129.2 (2 C), 128.3, 124.3, 113.7 (2 C), 72.8, 71.5, 63.7, 55.2, 51.0, 41.8, 34.3, 31.6, 25.9 (3 C), 25.7, 25.2, 18.4, 17.6, 16.4,  $-5.1, -5.2$ ; HRMS-CI (calcd. for  $\text{C}_{29}\text{H}_{49}\text{O}_5\text{Si}$   $[\text{M}+\text{H}]^+$ ) 505.3344, found 505.3349.

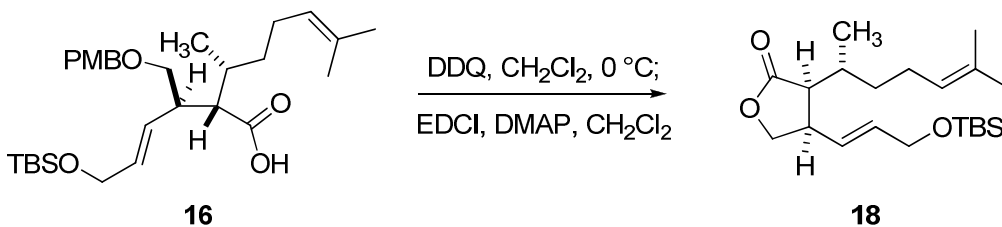

**(3S,4R)-4-((E)-3-(tert-butyldimethylsilyloxy)prop-1-enyl)-3-((R)-6-methylhept-5-en-2-yl)dihydrofuran-2(3H)-one (18)** To a solution of acid **16** (15 mg, 0.030 mmol) in  $\text{CH}_2\text{Cl}_2/\text{H}_2\text{O}$  (300  $\mu\text{L}$ , 18:1) at 0  $^\circ\text{C}$  was added DDQ (17.6 mg, 0.078 mmol) in a single portion. The reaction was stirred for 3 h and was then quenched with saturated aqueous  $\text{NH}_4\text{Cl}$  (1 mL). The mixture was diluted in  $\text{CH}_2\text{Cl}_2$  (5 mL) and the layers were separated. The organic layer was dried over anhydrous  $\text{Na}_2\text{SO}_4$ , filtered and concentrated *in vacuo* to give a yellow residue. The residue was dissolved in  $\text{CH}_2\text{Cl}_2$  (1 mL) and excess EDCI and DMAP were added. After 1 h, TLC analysis

revealed complete consumption of the starting material and the reaction was diluted in  $\text{CH}_2\text{Cl}_2$  (3 mL) and washed with saturated aqueous  $\text{NH}_4\text{Cl}$  (2 x 5 mL) and brine (2 x 5 mL). The organic layer was then dried over anhydrous  $\text{MgSO}_4$ , filtered and concentrated *in vacuo* to give a yellow film. The crude product was purified via flash chromatography, (Hexanes/EtOAc (9:1)), providing **18** (8.1 mg, 73%) as a clear oil:  $[\alpha]_{\text{D}}^{22} +55.2^\circ$  (c 0.21,  $\text{CHCl}_3$ ); IR (film) 2956, 2928, 2856, 1776, 1128  $\text{cm}^{-1}$ ;  $^1\text{H}$  NMR (400 MHz,  $\text{CDCl}_3$ )  $\delta$  5.78–5.68 (m, 2H), 5.12–5.06 (m, 1H), 4.31 (A of ABX,  $J_{\text{AB}} = 9.0$  Hz,  $J_{\text{AX}} = 6.8$  Hz, 1H), 4.20–4.17 (m, 2H), 4.08 (B of ABX,  $J_{\text{BA}} = 9.0$  Hz,  $J_{\text{BX}} = 5.1$  Hz, 1H), 3.32–3.26 (m, 1H), 2.51 (dd,  $J = 8.1, 6.7$  Hz, 1H), 2.10–2.01 (m, 1H), 2.01–1.99 (m, 1H), 1.99–1.78 (m, 1H), 1.70 (s, 3H), 1.61 (s, 3H), 1.35–1.26 (m, 2H), 1.13 (d,  $J = 6.6$  Hz, 3H), 0.93 (s, 9H), 0.09 (s, 6H);  $^{13}\text{C}$  NMR (101 MHz,  $\text{CDCl}_3$ )  $\delta$  177.7, 133.8, 131.9, 125.1, 124.2, 71.5, 63.2, 48.5, 42.6, 35.2, 30.9, 26.1, 25.9, 25.4, 18.6, 17.9, 16.9,  $-5.1$ ; HRMS-Cl (calcd. for  $\text{C}_{21}\text{H}_{38}\text{O}_3\text{Si}$   $[\text{M}+\text{H}]^+$ ) 367.2668, found 367.2672.

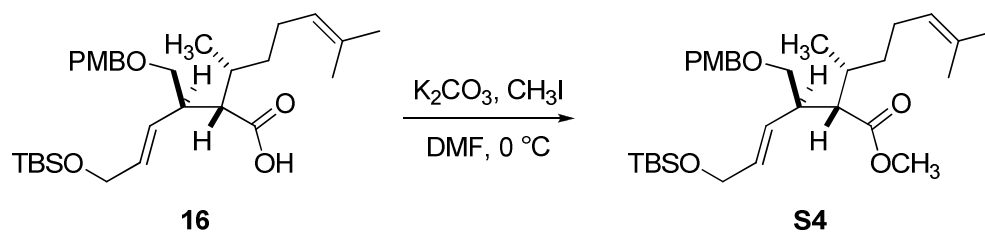

**(2S,3R)-Methyl 2-((R,E)-6-(tert-butyldimethylsilyloxy)-1-(4-methoxybenzyloxy)hex-4-en-2-yl)-3,7-dimethyloct-6-enoate (S4)** To a solution of **16** (319 mg, 0.63 mmol) in DMF (3.15 mmol) at 0 °C was added anhydrous  $\text{K}_2\text{CO}_3$  (157 mg, 1.14 mmol), followed by  $\text{CH}_3\text{I}$  (0.18 mL, 2.84 mmol). The reaction mixture was allowed to warm to ambient temperature with stirring for 2 h and was then diluted in  $\text{CH}_2\text{Cl}_2$  and washed with saturated aqueous  $\text{NH}_4\text{Cl}$ . The aqueous layer was extracted with  $\text{CH}_2\text{Cl}_2$  (3 x 10 mL) and the combined organic extracts were washed



(Hexanes/EtOAc (9:1)) providing **S5** (813 mg, 100%) as a clear oil:  $R_f$  0.19 (Hexanes/EtOAc (17:3));  $[\alpha]_D^{23} +27.9^\circ$  (0.88,  $\text{CHCl}_3$ ); IR (film) 3448 (br), 2928, 2855, 1513, 1249  $\text{cm}^{-1}$ ;  $^1\text{H}$  NMR (400 MHz,  $\text{CDCl}_3$ )  $\delta$  7.26–7.21 (m, 2H), 6.90–6.86 (m, 2H), 5.79 (dd,  $J = 15.5, 9.1$  Hz, 1H), 5.66 (dt,  $J = 15.5, 5.1$  Hz, 1H), 5.11–5.04 (m, 1H), 4.48–4.39 (m, 2H), 4.14 (br. d,  $J = 5.0$  Hz, 2H), 3.80 (s, 3H), 3.66–3.55 (m, 2H), 3.51 (dd,  $J = 9.1, 5.4$  Hz, 1H), 3.48 (dd,  $J = 9.1, 5.1$  Hz, 1H), 2.59–2.48 (m, 2H), 2.07–1.84 (m, 2H), 1.67 (s, 3H), 1.65–1.55 (m, 2H), 1.59 (s, 3H), 1.48–1.36 (m, 1H), 1.28–1.16 (m, 1H), 0.90 (s, 9H), 0.88 (d,  $J = 6.7$  Hz, 3H), 0.06 (s, 6H);  $^{13}\text{C}$  NMR (101 MHz,  $\text{CDCl}_3$ )  $\delta$  159.2, 131.3 (2 C), 130.9, 130.0, 129.3 (2 C), 124.6, 113.8 (2 C), 73.2, 72.9, 63.7, 61.7, 55.2, 47.1, 44.0, 35.3, 33.6, 25.9 (3 C), 25.8, 25.7, 18.3, 17.7, 16.4,  $-5.2$  (2 C); HRMS-ESI (calcd. for  $\text{C}_{29}\text{H}_{50}\text{O}_4\text{SiNa}$   $[\text{M}+\text{Na}]^+$ ) 513.3376, found 513.3352.

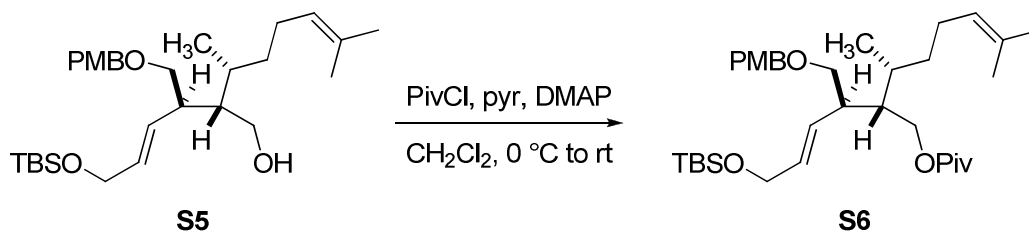

**(2S,3R)-2-((R,E)-5-(tert-Butyldimethylsilyloxy)-1-(4-methoxybenzyloxy)pent-3-en-2-yl)-3,7-dimethyloct-6-enyl pivalate (S6)** To a solution of **S5** (994 mg, 2.03 mmol), pyridine (0.82 mL, 10.14 mmol), and DMAP (50 mg, 0.41 mmol) in  $\text{CH}_2\text{Cl}_2$  (20 mL) at  $0^\circ\text{C}$  was added pivaloyl chloride (1.25 mL, 10.14 mmol). The mixture was allowed to slowly warm to ambient temperature and was stirred for 5 h. The reaction was diluted with  $\text{CH}_2\text{Cl}_2$  (50 mL) and saturated, aqueous  $\text{NH}_4\text{Cl}$  (30 mL) was added. The aqueous layer was then separated and extracted with  $\text{CH}_2\text{Cl}_2$  (3 x 50 mL). The combined organic extracts were dried over anhydrous  $\text{Na}_2\text{SO}_4$ , filtered and concentrated *in vacuo*. The crude product was purified via flash chromatography (Hexanes/EtOAc (9:1)), providing **S6** (1.11 g, 95%) as a colorless oil:  $R_f$  0.42

(Hexanes/EtOAc (17:3));  $[\alpha]_D^{22} +17.0^\circ$  (c 1.01, CHCl<sub>3</sub>); IR (film) 2957, 2929, 2856, 1727, 1514, 1249 cm<sup>-1</sup>; <sup>1</sup>H NMR (400 MHz, CDCl<sub>3</sub>)  $\delta$  7.25–7.20 (m, 2H), 6.89–6.83 (m, 2H), 5.61–5.56 (m, 2H), 5.12–5.06 (m, 1H), 4.42 (d,  $J = 11.9$  Hz, 1H), 4.41 (d,  $J = 11.9$  Hz, 1H), 4.18–4.10 (m, 2H), 4.09–3.99 (m, , 2H), 3.80 (s, 3H), 3.46 (d,  $J = 5.9$  Hz, 2H), 2.63–2.53 (m, 1H), 2.07–1.85 (m, 2H), 1.84–1.77 (m, 1H), 1.72–1.65 (m, 1H), 1.67 (s, 3H), 1.59 (s, 3H), 1.49–1.36 (m, 1H), 1.35–1.22 (m, 1H), 1.17 (s, 9H), 0.92–0.86 (m, 12 H), 0.05 (s, 6H); <sup>13</sup>C NMR (101 MHz, CDCl<sub>3</sub>)  $\delta$  178.3, 159.0, 131.6, 131.2, 130.5, 130.1, 129.0 (2 C), 124.5, 113.6 (2 C), 72.6, 72.1, 63.7, 63.4, 55.1, 42.8, 41.8, 38.5, 35.4, 32.6, 27.1 (3 C), 25.9 (3 C), 25.7, 25.6, 18.3, 17.6, 16.2, –5.2 (2 C); HRMS-Cl (calcd for C<sub>34</sub>H<sub>57</sub>O<sub>5</sub>Si [M-H]<sup>+</sup>) 573.3970, found 573.3979.

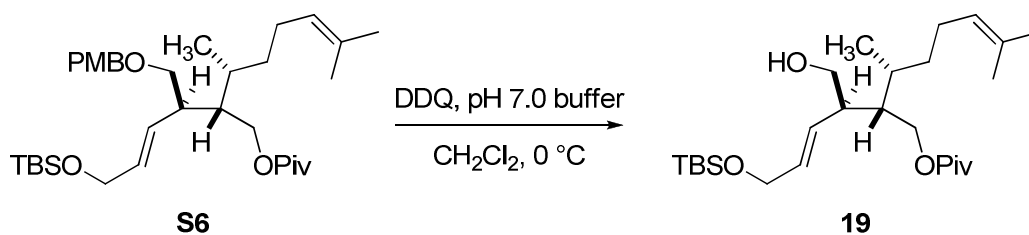

**(2S,3R)-2-((R,E)-5-(tert-Butyldimethylsilyloxy)-1-hydroxypent-3-en-2-yl)-3,7-dimethyloct-6-enyl pivalate (19)** To a solution of **S6** (1.42 g, 2.47 mmol) in CH<sub>2</sub>Cl<sub>2</sub> (25 mL) and pH 7.0 buffer (2.5 mL) at 0 °C was added DDQ (841 mg, 3.71 mmol) in one portion to give a green suspension. The reaction was stirred for 10 min and then warmed to ambient temperature. After 2 h, the orange reaction mixture was diluted by the addition of saturated aqueous NaHCO<sub>3</sub>. The layers were separated and the aqueous layer was then extracted with CH<sub>2</sub>Cl<sub>2</sub> (3 x 50 mL). The combined organic extracts were combined, dried over anhydrous Na<sub>2</sub>SO<sub>4</sub>, filtered and concentrated *in vacuo*. The crude product was purified via flash chromatography (Hexanes/EtOAc (9:1)), providing **19** (853 mg, 76%) as a colorless oil:  $R_f$  0.19 (Hexanes/EtOAc (17:3));  $[\alpha]_D^{24} +7.9^\circ$  (c 0.82, CHCl<sub>3</sub>); IR (film) 3479 (br), 2958, 2929, 2857, 1729, 1159 cm<sup>-1</sup>;

$^1\text{H}$  NMR (400 MHz,  $\text{CDCl}_3$ )  $\delta$  5.67 (td,  $J = 15.4, 4.8$  Hz, 1H), 5.50 (dd,  $J = 15.4, 9.5$  Hz, 1H), 5.09–5.02 (m, 1H), 4.16–4.12 (m, 2H), 4.10 (dd,  $J = 11.7, 4.6$  Hz, 1H), 4.01 (dd,  $J = 11.61, 5.18$  Hz, 1H), 3.72–3.63 (m, 1H), 3.54–3.42 (m, 1H), 2.48 (ddd,  $J = 14.6, 8.8, 6.0$  Hz, 1H), 2.10–1.85 (m, 2H), 1.85–1.72 (m, 1H), 1.72–1.60 (m, 2 H), 1.67 (s, 3H), 1.59 (s, 3H), 1.49–1.35 (m, 1H), 1.32–1.23 (m, 1H), 1.21–1.13 (m, 9H), 0.91 (d,  $J = 6.7$  Hz, 3H), 0.89 (s, 9H), 0.05 (s, 6H);  $^{13}\text{C}$  NMR (101 MHz,  $\text{CDCl}_3$ )  $\delta$  178.5, 133.9, 131.5, 129.0, 124.4, 64.3, 63.5, 63.4, 45.8, 42.1, 38.6, 35.2, 33.0, 27.2 (3 C), 25.9 (3 C), 25.7, 25.6, 18.3, 17.7, 16.2,  $-5.2$  (2 C); HRMS-Cl (calcd for  $\text{C}_{26}\text{H}_{51}\text{O}_4\text{Si}$   $[\text{M}+\text{H}]^+$ ) 455.3551, found 455.3560.

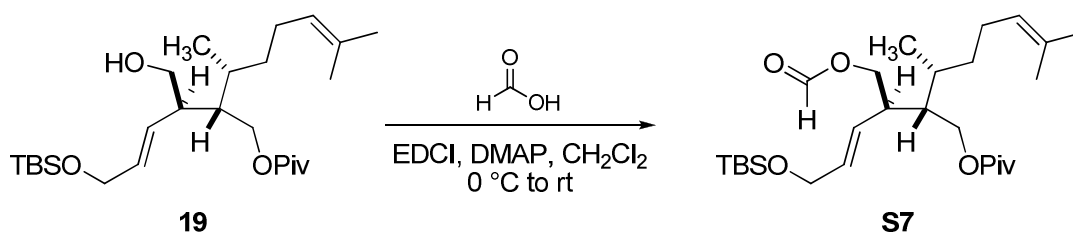

**(2S,3R)-2-((R,E)-5-(tert-Butyldimethylsilyloxy)-1-(formyloxy)pent-3-en-2-yl)-3,7-**

**dimethyloct-6-enyl pivalate (S7)** Formic acid (90  $\mu\text{L}$ , 1.93 mmol), EDCI (1.00 g, 5.24 mmol), and DMAP (257 mg, 2.10 mmol) were sequentially added to a solution of alcohol **19** (795 mg, 1.75 mmol) in  $\text{CH}_2\text{Cl}_2$  (20 mL) at 0  $^\circ\text{C}$ . The reaction was allowed to warm to ambient temperature and was then stirred for 3 h. The reaction mixture was diluted in saturated aqueous  $\text{NH}_4\text{Cl}$  (10 mL). The layers were immediately separated and the aqueous layer was extracted with  $\text{CH}_2\text{Cl}_2$  (3 x 20 mL). The combined organic extracts were washed with water (30 mL) and brine (30 mL) and then dried over anhydrous  $\text{Na}_2\text{SO}_4$ , filtered and concentrated *in vacuo*. The crude product was purified via flash chromatography (Hexanes/EtOAc (97:3)), providing **S7** (814 mg, 96%) as a colorless oil:  $R_f$  0.44 (Hexanes/EtOAc (17:3));  $[\alpha]_D^{22} +7.9^\circ$  (c 0.95,  $\text{CHCl}_3$ );

IR (film) 2958, 2929, 2857, 1729, 1156  $\text{cm}^{-1}$ ;  $^1\text{H}$  NMR (400 MHz,  $\text{CDCl}_3$ )  $\delta$  8.04 (s, 1H), 5.63 (dt,  $J = 15.4, 4.7$  Hz, 1H), 5.54 (dd,  $J = 15.4, 8.9$  Hz, 1H), 5.13–5.01 (m, 1H), 4.28–4.15 (m, 2H), 4.10 (d,  $J = 4.4$  Hz, 2H), 4.08–3.99 (m, 2H), 2.74–2.55 (m, 1H), 2.10–1.85 (m, 2H), 1.76–1.68 (m, 1H), 1.68–1.58 (m, 1H), 1.65 (s, 3H), 1.57 (s, 3H), 1.46–1.33 (m, 1H), 1.33–1.21 (m, 1H), 1.17 (m, 9H), 0.92 (d,  $J = 6.9$  Hz, 3H), 0.91–0.87 (s, 9H), 0.19–0.08 (s, 6H);  $^{13}\text{C}$  NMR (101 MHz,  $\text{CDCl}_3$ )  $\delta$  178.2, 160.7, 133.1, 131.5, 127.9, 124.2, 65.7, 63.3, 63.1, 41.9, 41.8, 38.5, 35.2, 32.6, 27.1 (3 C), 25.8 (3 C), 25.6, 25.6, 18.3, 17.6, 16.1, –5.3, –5.3; HRMS-CI (calcd for  $\text{C}_{27}\text{H}_{51}\text{O}_5\text{Si}$   $[\text{M}+\text{H}]^+$ ) 483.3500, found 483.3517.

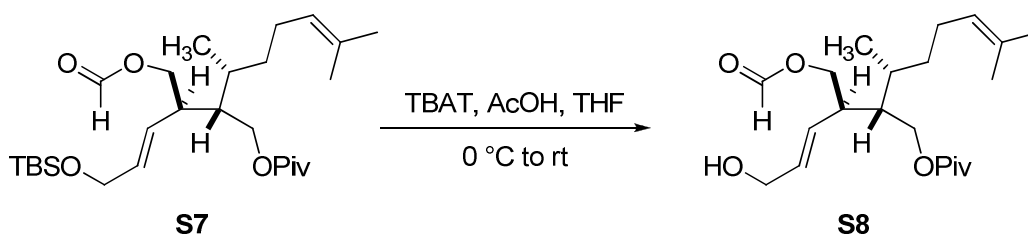

**(2S,3R)-2-((R,E)-1-(Formyloxy)-5-hydroxypent-3-en-2-yl)-3,7-dimethyloct-6-enyl pivalate (S8)** Acetic acid (1.52 mL, 26.58 mmol) and tetrabutylammonium triphenyldifluorosilicate (TBAT, 9.37 g, 17.36 mmol) were sequentially added to a solution of **S7** (4.19 g, 8.68 mmol) in THF (90 mL) at 0 °C. The reaction was then allowed to warm to ambient temperature and was stirred for 12 h. The reaction was quenched with the addition of water (40 mL) and was diluted in  $\text{Et}_2\text{O}$  (100 mL). The aqueous layer was then separated and extracted with  $\text{Et}_2\text{O}$  (3 x 50 mL). The combined organic extracts were washed with water (2 x 50 mL) and brine (2 x 50 mL) and then dried over anhydrous  $\text{Na}_2\text{SO}_4$ , filtered and concentrated *in vacuo*. The crude product was purified via flash chromatography (Hexanes/ $\text{EtOAc}$  (4:1)), providing **S8** (3.17 g, 99%) as a colorless oil:  $R_f$  0.16 (Hexanes/ $\text{EtOAc}$  (3:1));  $[\alpha]_D^{23} +2.9^\circ$  (c 0.90,  $\text{CHCl}_3$ ); IR (film) 3431,

2964, 2917, 1723, 1715, 1157  $\text{cm}^{-1}$ ;  $^1\text{H}$  NMR (400 MHz,  $\text{CDCl}_3$ )  $\delta$  8.01 (s, 1H), 5.68 (td,  $J = 15.4, 5.5$  Hz, 1H), 5.54 (dd,  $J = 15.4, 9.2$  Hz, 1H), 5.08-4.99 (m, 1H), 4.22-4.13 (m, 3H), 4.12-3.99 (m, 4H), 2.67-2.56 (m, 1H), 2.07-1.84 (m, 3H), 1.76-1.68 (m, 1H), 1.68-1.60 (m, 1H), 1.65 (s, 3H), 1.57 (s, 3H), 1.45-1.33 (m, 1H), 1.32-1.23 (m, 1H), 1.15 (s, 9H), 0.90 (d,  $J = 6.9$  Hz, 3H);  $^{13}\text{C}$  NMR (101 MHz,  $\text{CDCl}_3$ )  $\delta$  178.5, 160.9, 132.7, 131.6, 130.2, 124.1, 65.5, 63.1, 62.9, 41.9, 41.9, 38.6, 35.3, 32.4, 27.1 (3 C), 25.6, 25.6, 17.6, 16.0; HRMS-Cl (calcd for  $\text{C}_{21}\text{H}_{35}\text{O}_4$  [ $\text{M}-\text{OH}]^+$ ) 351.2530, found 351.2526.

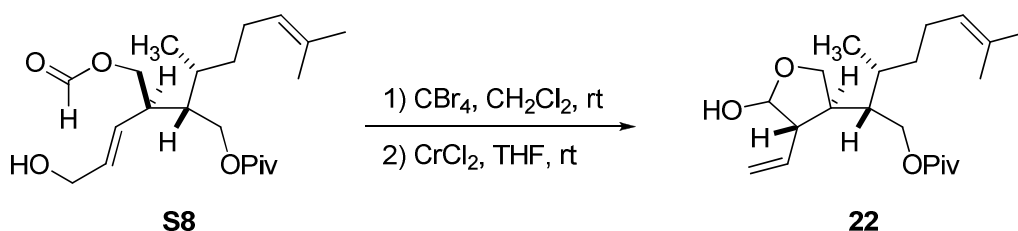

**(2S,3R)-2-((3S,4S)-5-Hydroxy-4-vinyltetrahydrofuran-3-yl)-3,7-dimethyloct-6-enyl pivalate**

**(22)** To a solution of  $\text{CBr}_4$  (2.34 g, 7.05 mmol) and  $\text{PPh}_3$  (2.44 g, 9.31 mmol) in  $\text{CH}_2\text{Cl}_2$  (10 mL) at  $0^\circ\text{C}$  was added a solution of **S8** (980 mg, 2.66 mmol) in  $\text{CH}_2\text{Cl}_2$  (17 mL). The reaction was allowed to stir for 20 min and was then diluted in hexanes (50 mL) and passed through a plug of silica gel followed by a wash with 15% EtOAc in hexanes (100 mL). The filtrate was concentrated *in vacuo* and then dissolved in THF (175 mL). To the solution was added  $\text{CrCl}_2$  (689 mg, 5.61 mmol), resulting in a green-gray suspension. After 10 h, the purple homogeneous solution was quenched with water (150 mL) and then diluted in EtOAc (200 mL). The aqueous layer was separated and extracted with EtOAc (3 x 200 mL). The combined organic extracts were then dried over anhydrous  $\text{Na}_2\text{SO}_4$ , filtered and concentrated *in vacuo*. The crude product was purified via flash chromatography (Hexanes/EtOAc (17:3)), providing **22** (863 mg, 92%) as a 2:1 mixture of inseparable C-19 diastereomers:  $R_f$  0.26 (Hexanes/EtOAc (3:1)); IR (film) 3424 (br), 2965, 2930, 1727, 1480, 1284, 1157  $\text{cm}^{-1}$ ;  $^1\text{H}$  NMR (400 MHz,  $\text{CDCl}_3$ )  $\delta$  5.86-5.64 (m,



1H), 5.29 (dd,  $J = 4.2, 3.4$  Hz, 0.3H), 5.23–4.98 (m, 3.7H), 4.25 (t,  $J = 8.3$  Hz, 0.3H), 4.15–3.99 (m, 2.7H), 3.77 (dd,  $J = 9.8, 8.6$  Hz, 0.7H), 3.64 (t,  $J = 8.2$  Hz, 0.3H), 2.71–2.49 (m, 1.3H), 2.33–2.21 (m, 0.7H), 2.02–1.86 (m, 2H), 1.83–1.74 (m, 0.7H), 1.71–1.61 (m, 0.3H), 1.66 (s, 3H), 1.58 (s, 3H), 1.52–1.24 (m, 3H), 1.19–1.14 (m, 9H), 0.91–0.84 (m, 3H);  $^{13}\text{C}$  NMR (101 MHz,  $\text{CDCl}_3$ )  $\delta$  178.3, 138.7, 136.6, 131.6, 124.1, 117.4, 116.4, 103.8, 100.5, 72.0, 71.0, 63.0, 62.8, 56.2, 53.6, 44.9, 44.8, 44.3, 40.7, 38.5, 35.9, 35.7, 33.7, 33.6, 27.2, 25.9, 25.8, 25.6, 17.7, 25.9, 15.6; HRMS-Cl (calcd for  $\text{C}_{21}\text{H}_{35}\text{O}_3$   $[\text{M}-\text{OH}]^+$ ) 335.2581, found 335.2572.

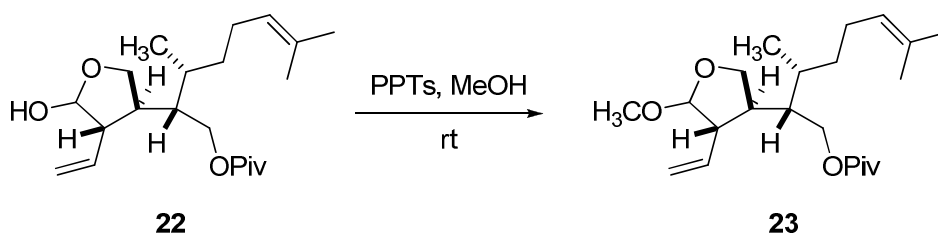

**(2S,3R)-2-((3S,4S)-5-methoxy-4-vinyltetrahydrofuran-3-yl)-3,7-dimethyloct-6-enyl pivalate**

**(23)** To a solution of lactol **22** (440 mg, 1.25 mmol) in MeOH (13 mL) at ambient temperature was added PPTs (32 mg, 0.125 mmol). After stirring for 12 h, the reaction solution was diluted in  $\text{Et}_2\text{O}$  (25 mL) and washed with  $\text{H}_2\text{O}$  (3 x 15 mL) and brine (15 mL). The organic layer was dried over  $\text{Na}_2\text{SO}_4$ , filtered and concentrated *in vacuo*. The crude product was purified via flash chromatography (Hexanes/ $\text{EtOAc}$  (19:1)), providing **23** (456 mg, 100%) as a 58:42 inseparable mixture of C-19 diastereomers:  $R_f$  0.87 (Hexanes/ $\text{EtOAc}$  (3:1)); IR (film) 2966, 2927, 1729, 1283, 1159, 1033  $\text{cm}^{-1}$ ;  $^1\text{H}$  NMR (400 MHz,  $\text{CDCl}_3$ )  $\delta$  5.83–5.66 (m, 1H), 5.17–4.98 (m, 3H), 4.79 (d,  $J = 4.1$  Hz, 0.4H), 4.72 (d,  $J = 2.2$  Hz, 0.6H), 4.19–3.98 (m, 3H), 3.70–3.65 (m, 0.4H), 3.61 (dd,  $J = 10.1, 8.5$  Hz, 0.6H), 3.34 (s, 0.6H), 3.32 (s, 0.4H), 2.61–2.54 (m, 1.4H), 2.25 (tt,  $J = 10.2, 7.4$  Hz, 0.6H), 2.04–1.86 (m, 2.4H), 1.81–1.72 (m, 0.6H), 1.68 (s, 3H), 1.60 (s, 3H), 1.54–1.44 (m, 1H), 1.42–1.27 (m, 2H), 1.20–1.17 (m, 9H), 0.90 (d,  $J = 7.0$  Hz, 1.2H), 0.89 (d,  $J$

= 6.9 Hz, 1.8H);  $^{13}\text{C}$  NMR (101 MHz,  $\text{CDCl}_3$ )  $\delta$  178.2, 139.1, 136.8, 131.6, 124.2, 124.1, 116.8, 115.9, 110.5, 107.3, 71.8, 70.8, 63.0, 62.8, 55.5, 54.9, 54.6, 53.6, 45.1, 44.9, 44.3, 41.1, 38.5, 35.9, 35.7, 33.7, 33.6, 27.2 (3 C), 25.9, 25.8, 25.6, 17.6, 15.9, 15.6; HRMS-CI (calcd for  $\text{C}_{22}\text{H}_{37}\text{O}_4$   $[\text{M}-\text{H}]^+$ ) 365.2686, found 365.2670.

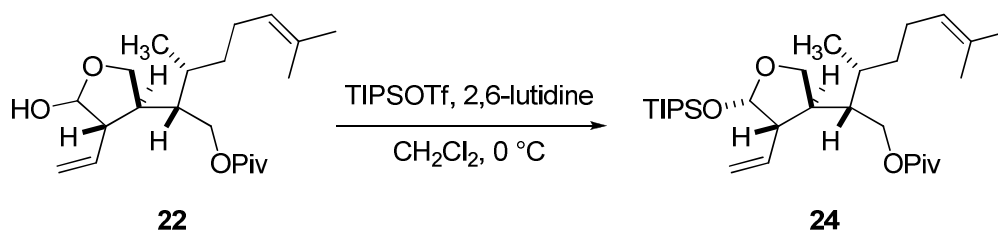

**(2S,3R)-3,7-Dimethyl-2-((3S,4S,5S)-5-(triisopropylsilyloxy)-4-vinyltetrahydrofuran-3-**

**yl)oct-6-enyl pivalate (24)** To a solution of lactol **22** (2.43 g, 6.89 mmol) in  $\text{CH}_2\text{Cl}_2$  (70 mL) at  $0\text{ }^\circ\text{C}$  were added 2,6-lutidine (3.20 mL, 27.57 mmol) and TIPSOTf (3.72 mL, 13.79 mmol). The reaction was allowed to stir at  $0\text{ }^\circ\text{C}$  for 90 minutes and was then diluted in  $\text{CH}_2\text{Cl}_2$  (50 mL) and brine (50 mL). The layers were separated and the aqueous layer was extracted with  $\text{CH}_2\text{Cl}_2$  (3 x 50 mL). The combined organic extracts were dried over anhydrous  $\text{Na}_2\text{SO}_4$ , filtered and concentrated *in vacuo*. The crude product was purified via flash chromatography (Hexanes/EtOAc (50:1)), providing **24** (3.16 g, 90%) as a 91:9 mixture of inseparable C-19 diastereomers. The major diastereomer was characterized as follows:  $R_f$  0.82 (Hexanes/EtOAc (3:1)); IR (film) 2963, 2941, 2867, 1730, 1157  $\text{cm}^{-1}$ ;  $^1\text{H}$  NMR (400 MHz,  $\text{CDCl}_3$ )  $\delta$  5.72 (dt,  $J = 17.1, 9.8$  Hz, 1H), 5.22 (d,  $J = 1.4$  Hz, 1H), 5.14–5.03 (m, 2H), 5.02–4.96 (m, 1H), 4.10 (d,  $J = 4.1$  Hz, 2H), 4.05 (t,  $J = 7.9$  Hz, 1H), 3.77 (t,  $J = 8.9$  Hz, 1H), 2.69–2.57 (m, 1H), 2.27–2.16 (m, 1H), 2.05–1.89 (m, 2H), 1.87–1.79 (m, 1H), 1.68 (s, 3H), 1.60 (s, 3H), 1.55–1.45 (m, 1H), 1.42–1.24 (m, 2H), 1.22–1.15 (m, 9H), 1.12–1.01 (m, 21H), 0.88 (d,  $J = 7.0$  Hz, 3H);  $^{13}\text{C}$  NMR (101 MHz,  $\text{CDCl}_3$ )  $\delta$  178.3, 139.7, 131.6, 124.2, 115.7, 103.8, 70.8, 63.2, 58.0, 44.8, 44.5, 38.6, 35.8,

33.6, 27.2 (3 C), 25.9, 25.7, 17.8 (4 C), 17.7 (3 C), 15.6, 12.0 (3 C); HRMS-ESI (calcd for  $C_{30}H_{56}O_4SiNa [M+Na]^+$ ) 531.3846, found 531.3843.

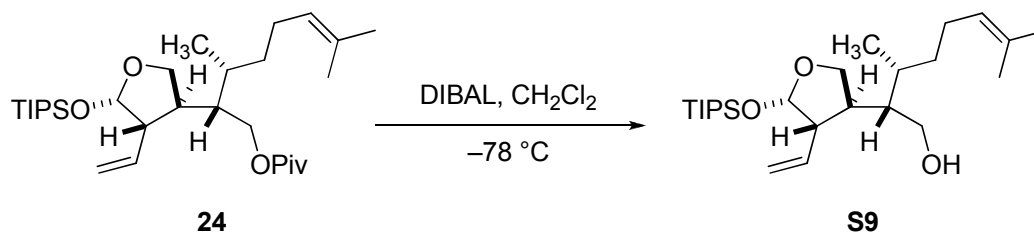

**(2S,3R)-3,7-Dimethyl-2-((3S,4S,5S)-5-(triisopropylsilyloxy)-4-vinyltetrahydrofuran-3-yl)oct-6-en-1-ol (S9)** To a solution of alcohol **24** (3.36 g, 6.60 mmol) in  $\text{CH}_2\text{Cl}_2$  (140 mL) at -

78 °C was added DIBAL (1.0 M in hexanes, 16.51 mL, 16.51 mmol). The reaction was allowed to stir for 1 h and was then quenched at -78 °C with the addition of a saturated aqueous solution of potassium sodium tetrates (200 mL). Mixture was warmed to ambient temperature and stirred vigorously overnight. The layers were separated and the aqueous layer was extracted with  $\text{CH}_2\text{Cl}_2$  (3 x 200 mL). Combined organic extracts were dried over anhydrous  $\text{Na}_2\text{SO}_4$ , filtered and concentrated *in vacuo*. The crude product was purified via flash chromatography (Hexanes/EtOAc (19:1)), providing **S9** (2.70g, 96%) as a 91:9 mixture of inseparable C-19 diastereomers. The major diastereomer was characterized as follows:  $R_f$  0.64 (Hexanes/EtOAc (3:1)); IR (film) 3438 (br), 2940, 2866, 2360, 2342, 1457, 1027  $\text{cm}^{-1}$ ;  $^1\text{H}$  NMR (400 MHz,  $\text{CDCl}_3$ )  $\delta$  5.81 (dt,  $J = 17.2, 9.5$  Hz, 1H), 5.26–5.21 (m, 1H), 5.21–5.03 (m, 3H), 4.05 (t,  $J = 8.1$  Hz, 1H), 3.88–3.77 (m, 1H), 3.77–3.63 (m, 2H), 2.77–2.67 (m, 1H), 2.24–2.13 (m, 1H), 2.10–1.81 (m, 3H), 1.68 (s, 3H), 1.63–1.55 (m, 1H), 1.59 (s, 3H), 1.54–1.35 (m, 2H), 1.34–1.23 (m, 1H), 1.14–1.01 (m, 21H), 0.87 (d,  $J = 6.8$  Hz, 3H);  $^{13}\text{C}$  NMR (101 MHz,  $\text{CDCl}_3$ )  $\delta$  140.3, 131.5, 124.4, 115.9, 104.0, 71.5, 61.5, 57.1, 47.5, 45.4, 35.7, 34.0, 26.0, 25.7, 17.9, 17.8 (3 C), 17.7, (3 C), 15.7, 12.0 (3 C); HRMS-ESI (calcd for  $C_{25}H_{48}O_3SiNa [M+Na]^+$ ) 447.3270, found 447.3256.

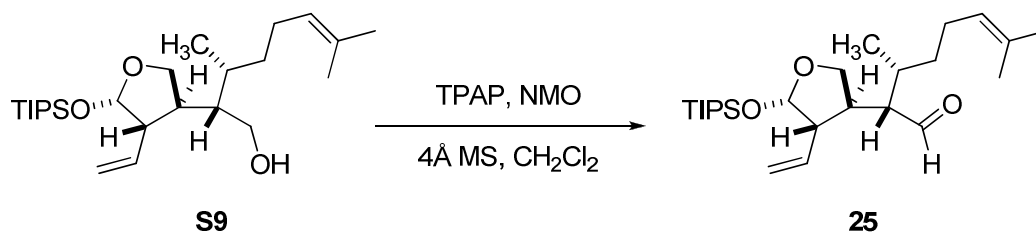

**(2S,3R)-3,7-Dimethyl-2-((3S,4S,5S)-5-(triisopropylsilyloxy)-4-vinyltetrahydrofuran-3-**

**yl)oct-6-enal (25)** To a solution of alcohol **S9** (381 mg, 0.90 mmol, 10:1 mixture of C-19 diastereomers) in  $\text{CH}_2\text{Cl}_2$  (9.0 mL) were added powdered, activated 4Å MS (500 mg) and NMO (157 mg, 1.34 mmol). The suspension was allowed to stir for 10 min and then TPAP (31 mg, 0.09 mmol) was added in one portion. The reaction was allowed to stir for 45 minutes and was then filtered through a plug of silica gel. The filtrate was concentrated *in vacuo* to give a dark oil that was purified via flash chromatography (Hexanes/EtOAc (49:1)), providing **25** (375 mg, 99%) as a 91:9 inseparable mixture of diastereomers. The major diastereomer was characterized as follows:  $R_f$  0.62 (Hexanes/EtOAc (17:3)); IR (film) 2924, 2866, 1723, 1463, 1027  $\text{cm}^{-1}$ ;  $^1\text{H}$  NMR (400 MHz,  $\text{CDCl}_3$ )  $\delta$  9.70 (d,  $J = 3.6$  Hz, 1H), 5.80–5.64 (m, 1H), 5.23 (d,  $J = 1.4$  Hz, 1H), 5.13–4.97 (m, 3H), 4.14–4.03 (m, 1H), 3.82–3.71 (m, 1H), 2.59–2.42 (m, 3H), 2.08–1.96 (m, 2H), 1.74–1.65 (m, 1H), 1.68 (s, 3H), 1.60 (s, 3H), 1.51–1.37 (m, 1H), 1.35–1.18 (m, 1H), 1.12–1.01 (m, 21H), 1.01–0.95 (m, 3H);  $^{13}\text{C}$  NMR (101 MHz,  $\text{CDCl}_3$ )  $\delta$  205.2, 138.2, 132.1, 123.7, 116.7, 103.4, 69.7, 59.0, 58.1, 42.4, 35.7, 33.6, 25.7, 25.6, 17.8 (3 C), 17.7 (3 C), 17.7 15.4, 11.9 (3 C); HRMS-Cl (calcd for  $\text{C}_{25}\text{H}_{47}\text{O}_3\text{Si}$   $[\text{M}+\text{H}]^+$ ) 423.3289, found 423.3286.

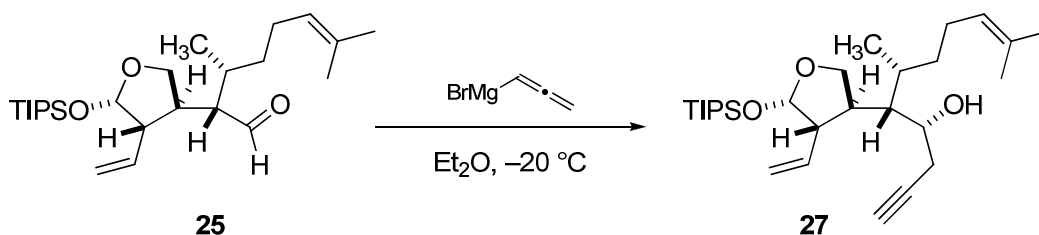

**(4R,5S,6R)-6,10-Dimethyl-5-((3S,4S,5S)-5-(triisopropylsilyloxy)-4-vinyltetrahydrofuran-3-yl)undec-9-en-1-yn-4-ol (27)** Allenylmagnesium bromide was prepared according to the procedure described by Kleinschroth and coworkers.<sup>2</sup> To a 2-neck round-bottom flask was added a stir bar, freshly polished magnesium turnings (750 mg, 30.73 mmol), and HgCl<sub>2</sub> (17 mg, 0.06 mmol). The flask was fitted with a condenser and placed under high-vacuum. The system was then flame-dried, cooled and back-filled with argon. To the flask were added Et<sub>2</sub>O (50 mL) and propargyl bromide (80% in toluene, 1.20 mL, 10.80 mmol). The reaction was heated to reflux to initiate Grignard formation and then cooled to -20 °C. Additional propargyl bromide (80% in toluene, 1.70 mL, 15.30 mmol) was added and reaction was stirred for 1 h. Next, a solution of aldehyde **25** (2.57 g, 6.09 mmol, 10:1 mixture of C-19 diastereomers) in Et<sub>2</sub>O (120 mL) was added over 30 minutes (syringe pump). The reaction was allowed to stir an additional 2 h and was quenched with saturated aqueous ammonium chloride (100 mL). Mixture was warmed to ambient temperature and stirred vigorously until complete consumption of magnesium was observed. The aqueous layer was then extracted with Et<sub>2</sub>O (3 x 100 mL) and the combined organic extracts were dried over anhydrous Na<sub>2</sub>SO<sub>4</sub>, filtered and concentrated *in vacuo*. The crude product was purified via flash chromatography (Hexanes/EtOAc (50:1)), providing **27** as a single diastereomer and the other C-4 and C-19 diastereomers as an inseparable mixture (combined yield: 2.70g, 96%): *R<sub>f</sub>* 0.33 (Hexanes/EtOAc (17:3)); [ $\alpha$ ]<sub>D</sub><sup>24</sup> +24.2° (c 0.95, CHCl<sub>3</sub>); IR (film) 3460 (br), 3312, 2942, 2926, 2866, 1463, 1025 cm<sup>-1</sup>; <sup>1</sup>H NMR (400 MHz, CDCl<sub>3</sub>)  $\delta$  5.72 (td, *J* = 17.7, 9.4 Hz, 1H), 5.23 (d, *J* = 2.0 Hz, 1H), 5.13–5.06 (m, 3H), 4.06 (t, *J* = 8.0 Hz,

1H), 3.99–3.92 (m, 1H), 3.90 (dd,  $J = 9.6, 8.6$  Hz, 1H), 2.58 (ddd,  $J = 9.2, 7.6, 1.6$  Hz, 1H), 2.45 (ddd,  $J = 16.6, 7.9, 2.6$  Hz, 1H), 2.34 (ddd,  $J = 16.6, 5.3, 2.6$  Hz, 1H), 2.28–2.17 (m, 1H), 2.24 (d,  $J = 4.5$  Hz, 1H), 2.03 (t,  $J = 2.55$  Hz, 1H), 2.00–1.90 (m, 2H), 1.76–1.66 (m, 2H), 1.68 (s, 3H), 1.60 (s, 3H), 1.33–1.16 (m, 2H), 1.16–0.99 (m, 21H), 0.95 (d,  $J = 6.9$  Hz, 3H);  $^{13}\text{C}$  NMR (101 MHz,  $\text{CDCl}_3$ )  $\delta$  139.4, 131.7, 124.3, 116.6, 103.0, 81.3, 70.7, 70.6, 69.0, 57.5, 46.5, 43.8, 36.0, 32.1, 27.0, 26.1, 25.7, 17.9 (3 C), 17.8 (3 C), 17.7, 17.4, 12.0 (3 C); HRMS-ESI (calcd for  $\text{C}_{28}\text{H}_{50}\text{O}_3\text{SiNa}$   $[\text{M}+\text{Na}]^+$ ) 485.3427, found 485.3438.

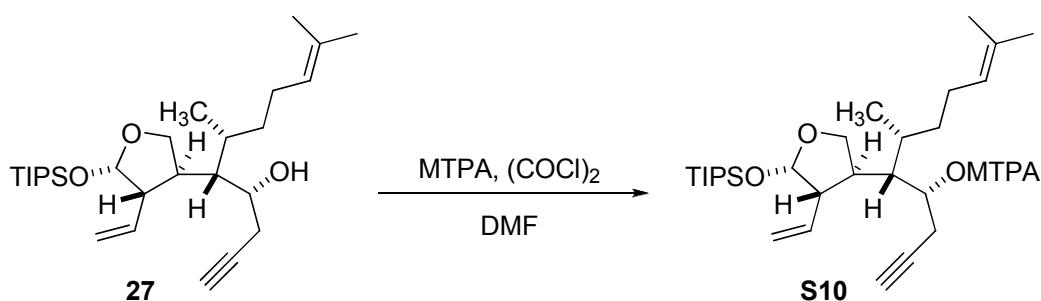

**General Procedure for the Formation of C-4 Mosher Esters (S10):** To a solution of (*S*)-(–)- $\alpha$ -methoxy- $\alpha$ -trifluoromethylphenylacetic acid (19 mg, 0.081 mmol) and DMF (10  $\mu\text{L}$ , 0.081 mmol) in hexanes (4 mL) was added oxalyl chloride (70  $\mu\text{L}$ , 0.081 mmol) at ambient temperature. The reaction was allowed to stir for 2 h and was then filtered and concentrated *in vacuo*. The acid chloride was then placed under argon and a solution of alcohol **27** (15 mg, 0.032 mmol) in  $\text{CH}_2\text{Cl}_2$  (4 mL) was added via syringe, followed by DMAP (20 mg, 0.162 mmol). The reaction was allowed to stir for 12 h and was then diluted in  $\text{H}_2\text{O}$  (3 mL) and  $\text{CH}_2\text{Cl}_2$  (3 mL). The layers were separated and the aqueous layer was extracted with  $\text{CH}_2\text{Cl}_2$  (3 x 5 mL). The combined organic extracts were then dried over anhydrous  $\text{Na}_2\text{SO}_4$ , filtered and concentrated *in vacuo* to give the crude (*S*)-Mosher ester (**S**)-**S10**. In a separate flask, (*R*)-(+)- $\alpha$ -

methoxy- $\alpha$ -trifluoromethylphenylacetic acid was employed in an identical procedure to give (**R**)-**S10**. Both esters were then used in crude form for  $^1\text{H-NMR}$  analysis :

### Selected Proton Shifts:

(**S**)-**S10**:  $^1\text{H NMR}$  (400 MHz,  $\text{CDCl}_3$ )  $\delta$  5.62 (ddd,  $J = 17.1, 9.8, 9.6$  Hz, 1H, H(e)), 5.30–5.23 (m, 1H, H(a)), 5.15 (d,  $J = 2.4$  Hz, 1H H(f)), 3.76 (dd,  $J = 7.9, 7.8$  Hz, 1H, H(c)), 3.53 (dd,  $J = 10.1, 8.4$  Hz, 1H, H(d)), 2.55 (ddd,  $J = 16.5, 6.6, 2.5$  Hz, 1H, H(g)), 1.98 (dd,  $J = 2.5, 2.5$  Hz, 1H, H(h)), 0.44 (d,  $J = 7.0$  Hz, 3H, H(b))

(**R**)-**S10**:  $^1\text{H NMR}$  (400 MHz,  $\text{CDCl}_3$ )  $\delta$  5.63 (ddd,  $J = 17.1, 9.8, 9.6$  Hz, 1H, H(e)), 5.35–5.28 (m, 1H, H(a)), 5.16 (d,  $J = 2.4$  Hz, 1H, H(f)), 3.79 (dd,  $J = 7.7, 7.7$  Hz, 1H, H(c)), 3.69–3.63 (m, 1H, H(d)), 2.37 (ddd,  $J = 16.5, 8.0, 2.6$  Hz, 1H, H(g)), 1.93 (dd,  $J = 2.6, 2.5$  Hz, 1H, H(h)), 0.73 (d,  $J = 7.0$  Hz, 1H, H(b))

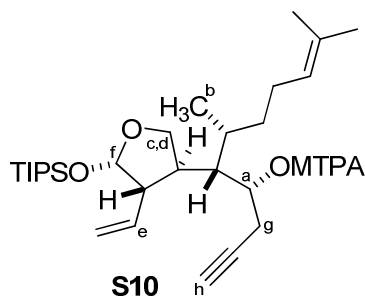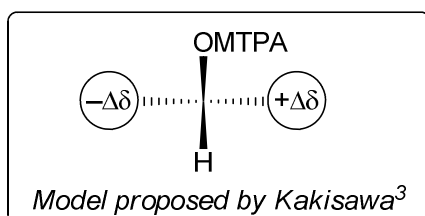

| Proton | $\delta_S$ (Hz) | $\delta_R$ (Hz) | $\Delta\delta$ ( $\delta_S - \delta_R$ ) |
|--------|-----------------|-----------------|------------------------------------------|
| a      | 2105            | 2126            | -21                                      |
| b      | 176             | 293             | -117                                     |
| c      | 1505            | 1517            | -12                                      |
| d      | 1412            | 1464            | -52                                      |
| e      | 2248            | 2251            | -3                                       |
| f      | 2058            | 2065            | -7                                       |
| g      | 1025            | 944             | +81                                      |
| h      | 793             | 770             | +23                                      |

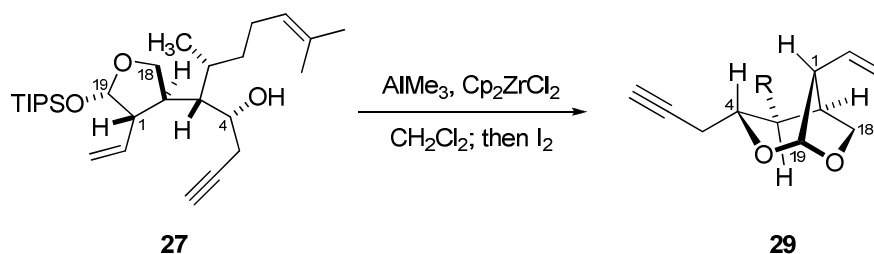

**(1R,3R,4S,5S,8S)-4-((R)-6-methylhept-5-en-2-yl)-3-(prop-2-ynyl)-8-vinyl-2,7-**

**dioxabicyclo[3.2.1]octane (29)** To a solution of  $\text{Cp}_2\text{ZrCl}_2$  (100 mg, 0.34 mmol) in  $\text{CH}_2\text{Cl}_2$  (0.85 mL) was added neat  $\text{AlMe}_3$  (100  $\mu\text{L}$ , 1.03 mmol). The resulting yellow solution was allowed to stir for 20 min at ambient temperature and was then cooled to  $-25\text{ }^\circ\text{C}$ . Next,  $\text{H}_2\text{O}$  (6  $\mu\text{L}$ , 0.34 mmol) and a solution of homopropargylic alcohol **27** (80 mg, 0.17 mmol) in  $\text{CH}_2\text{Cl}_2$  (0.75 mL) were added sequentially and the reaction was left to stir at  $-25\text{ }^\circ\text{C}$  for 18 h and then  $-5\text{ }^\circ\text{C}$  for 6 h. The reaction was then cooled to  $-20\text{ }^\circ\text{C}$  and a solution of  $\text{I}_2$  (431 mg, 1.7 mmol) in THF (1.7 mL) was added dropwise. The resulting mixture was warmed to  $0\text{ }^\circ\text{C}$  over 1 h and then quenched with the addition of ice. The mixture was diluted in saturated, aqueous  $\text{K}_2\text{CO}_3$  and then stirred for 30 min. The layers were separated and the aqueous layer was extracted with  $\text{CH}_2\text{Cl}_2$  (3 x 3 mL). The combined organic extracts were dried over anhydrous  $\text{Na}_2\text{SO}_4$ , filtered and concentrated to give an orange oil. The crude product was purified via flash chromatography (Hexanes/EtOAc (49:1)), providing **29** (31 mg, 62%) as a colorless oil:  $R_f$  0.35 (Hexanes/EtOAc (17:3));  $[\alpha]_D^{22} +59.8^\circ$  (c 0.67,  $\text{CHCl}_3$ ); IR (film) 3310, 2964, 2925, 1085  $\text{cm}^{-1}$ ;  $^1\text{H}$  NMR (400 MHz,  $\text{CDCl}_3$ )  $\delta$  5.66 (ddd,  $J = 17.5, 10.4, 7.3$  Hz, 1H), 5.27 (s, 1H), 5.19 (dt,  $J = 17.4, 1.1$  Hz, 1H), 5.12 (dt,  $J = 10.3, 1.1$  Hz, 1H), 5.10–5.04 (m, 1H), 3.99 (dd,  $J = 8.2, 4.4$  Hz, 1H), 3.68 (d,  $J = 8.2$  Hz, 1H), 3.68–3.61 (m, 1H), 2.77 (d,  $J = 7.2$  Hz, 1H), 2.54 (ddd,  $J = 17.0, 5.1, 2.6$  Hz, 1H), 2.44 (ddd,  $J = 17.0, 6.1, 2.6$  Hz, 1H), 2.29 (br. d,  $J = 4.3$  Hz, 1H), 2.16–2.04 (m, 1H), 2.03 (t,  $J = 2.6$  Hz, 1H), 1.98–1.86 (m, 1H), 1.76–1.70 (m, 1H), 1.70 (s, 3H), 1.61 (s,



3H), 1.62–1.50 (m, 2H), 1.23–1.11 (m, 1H), 1.00 (d,  $J = 6.8$  Hz, 3H);  $^{13}\text{C}$  NMR (101 MHz,  $\text{CDCl}_3$ )  $\delta$  134.8, 132.0, 124.1, 116.9, 101.5, 81.3, 73.0, 70.0, 68.7, 52.5, 45.9, 38.1, 34.2, 31.9, 26.1, 25.7 (2 C), 18.1, 17.7; HRMS-Cl (calcd for  $\text{C}_{19}\text{H}_{29}\text{O}_2$   $[\text{M}+\text{H}]^+$ ) 289.2162, found 289.2162.

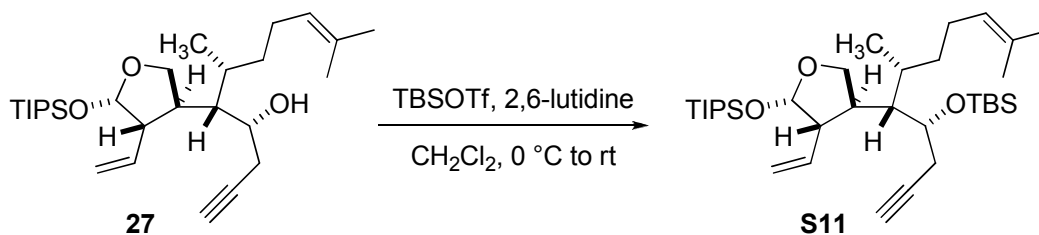

**tert-Butyl((4R,5S,6R)-6,10-dimethyl-5-((3S,4S,5S)-5-(triisopropylsilyloxy)-4-**

**vinyltetrahydrofuran-3-yl)undec-9-en-1-yn-4-yloxy)dimethylsilane (S11)**

To a solution of alcohol **27** (169 g, 0.37 mmol) in  $\text{CH}_2\text{Cl}_2$  (8.0 mL) at 0 °C were added 2,6-lutidine (0.51 mL, 4.38 mmol) and TBSOTf (0.49 mL, 1.83 mmol), sequentially. The reaction was then warmed to ambient temperature and stirred for an additional 3 h. The reaction was quenched with the addition of  $\text{H}_2\text{O}$  (10 mL), the layers were separated, and the aqueous layer was extracted with  $\text{CH}_2\text{Cl}_2$  (3 x 15 mL). The combined organic extracts were washed with a saturated aqueous solution of  $\text{CuSO}_4$  (3 x 15 mL),  $\text{H}_2\text{O}$  (20 mL) and brine (10 mL), dried over anhydrous  $\text{Na}_2\text{SO}_4$ , filtered and concentrated *in vacuo*. The crude product was purified via flash chromatography (Hexanes/EtOAc (99:1)), providing **S11** (196 mg, 93%) as a colorless oil:  $R_f$  0.70 (Hexanes/EtOAc (17:3));  $[\alpha]_D^{20} +22.0^\circ$  (c 0.96,  $\text{CHCl}_3$ ); IR (film) 3314, 2929, 2866, 2360, 2340, 1464, 1095  $\text{cm}^{-1}$ ;  $^1\text{H}$  NMR (400 MHz,  $\text{CDCl}_3$ )  $\delta$  5.72 (td,  $J = 17.0, 9.8$  Hz, 1H), 5.21 (d,  $J = 2.4$  Hz, 1H), 5.14–5.05 (m, 3H), 4.06–3.99 (m, 2H), 3.84 (dd,  $J = 10.3, 8.5$  Hz, 1H), 2.51 (dt,  $J = 9.1, 2.2$  Hz, 1H), 2.35 (ddd,  $J = 16.5, 7.6, 2.6$  Hz, 1H), 2.27 (ddd,  $J = 16.5, 6.0, 2.6$  Hz, 1H),

2.21-2.09 (m, 1H), 2.04–1.95 (m, 2H), 1.92 (t,  $J = 2.6$  Hz, 1H), 1.89-1.84 (m, 1H), 1.84-1.73 (m, 1H), 1.68 (s, 3H), 1.60 (s, 3H), 1.48-1.33 (m, 1H), 1.29-1.14 (m, 1H), 1.14-0.97 (m, 21H), 0.93 (d,  $J = 7.0$  Hz, 3H), 0.88 (s, 9H), 0.10 (s, 3H), 0.06 (s, 3H);  $^{13}\text{C}$  NMR (101 MHz,  $\text{CDCl}_3$ )  $\delta$  139.2, 131.4, 124.5, 116.5, 102.7, 81.9, 71.3, 70.1, 59.0, 46.6, 44.6, 35.8, 30.7, 26.1, 26.0 (3 C), 25.7, 25.6, 19.1, 18.1, 17.9 (3 C), 17.8 (3 C), 17.7, 12.0 (3 C), -3.9, -4.3; HRMS-Cl (calcd for  $\text{C}_{34}\text{H}_{63}\text{O}_3\text{Si}_2$   $[\text{M}-\text{H}]^+$ ) 575.4310, found 575.4318.

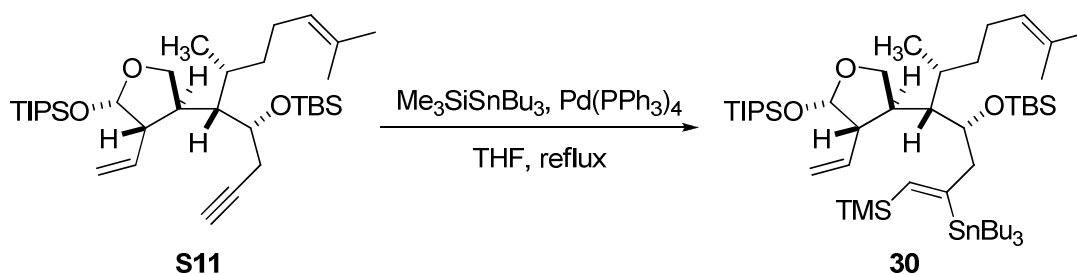

**tert-Butyl((4R,5S,6R,Z)-6,10-dimethyl-2-(tributylstannyl)-5-((3S,4S,5S)-5-**

**(triisopropylsilyloxy)-4-vinyltetrahydrofuran-3-yl)-1-(trimethylsilyl)undeca-1,9-dien-4-**

**yl)oxy)dimethylsilane (30)** To a solution of alkyne **S11** (195 g, 0.34 mmol) in THF (3.5 mL)

were added  $\text{Me}_3\text{SiSnBu}_3$  (0.59 mL, 1.69 mmol) and  $\text{Pd}(\text{PPh}_3)_4$  (78 mg, 0.07 mmol), sequentially.

The reaction was heated to reflux for 12 h and then cooled to ambient temperature, diluted in

hexanes (10 mL) and filtered through a plug of silica. The filtrate was concentrated *in vacuo* to

give crude **30** as a orange oil. The crude product was purified via flash chromatography

(Hexanes/EtOAc (99:1)), providing **30** (271 mg, 85%) as a colorless oil:  $R_f$  0.41

(Hexanes/EtOAc (19:1));  $[\alpha]_D^{23} +24.9^\circ$  (c 1.24,  $\text{CHCl}_3$ ); IR (film) 2956, 2971, 2867, 1463, 1247,

$1047\text{ cm}^{-1}$ ;  $^1\text{H}$  NMR (400 MHz,  $\text{CDCl}_3$ )  $\delta$  6.46 (s, 1H), 5.67 (dt,  $J = 17.1, 9.8$  Hz, 1H), 5.18 (d,

$J = 2.5$  Hz, 1H), 5.15–4.96 (m, 3H), 4.24–4.17 (m, 1H), 4.07 (t,  $J = 7.9$  Hz, 1H), 3.87 (dd,  $J =$

10.4, 8.6 Hz, 1H), 2.51 (ddd,  $J = 18.4, 9.2, 2.3$  Hz, 1H), 2.48-2.34 (m, 2H), 2.22-2.11 (m, 1H),

2.10–1.98 (m, 1H), 1.98–1.79 (m, 2H), 1.71–1.63 (m, 1H), 1.67 (s, 3H), 1.60 (s, 3H), 1.56–1.39 (m, 7H), 1.39–1.25 (m, 7H), 1.11–1.03 (m, 21H), 0.99–0.85 (m, 27H), 0.13–0.06 (m, 15H);  $^{13}\text{C}$  NMR (101 MHz,  $\text{CDCl}_3$ )  $\delta$  162.2, 145.0, 139.6, 131.2, 124.7, 116.6, 102.7, 71.1, 70.2, 59.2, 44.9, 36.5, 30.9, 29.3, 29.2 (3 C), 29.1, 27.5 (3 C), 26.3, 26.2 (3 C), 25.6, 19.5, 18.2, 17.9 (3 C), 17.8 (3 C), 17.7, 13.6 (3 C), 12.1 (3 C), 11.4 (3 C), 0.4 (3 C), –3.4, –3.6; HRMS-Cl (calcd for  $\text{C}_{49}\text{H}_{99}\text{O}_3\text{Si}_3\text{Sn}$   $[\text{M}-\text{H}]^+$ ) 939.5918, found 939.5945.

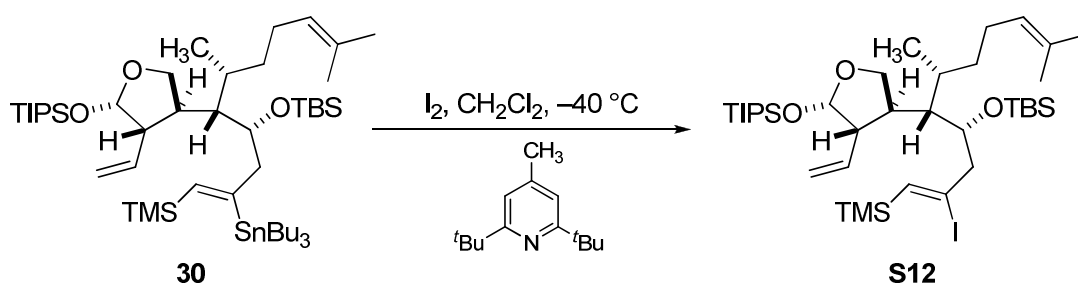

**tert-Butyl((4R,5S,6R,Z)-2-iodo-6,10-dimethyl-5-((3S,4S,5S)-5-(triisopropylsilyloxy)-4-vinyltetrahydrofuran-3-yl)-1-(trimethylsilyl)undeca-1,9-dien-4-yloxy)dimethylsilane (S12)**

Di-*t*-butyl-4-methylpyridine (187 mg, 0.91 mmol) and I<sub>2</sub> (77 mg, 0.30 mmol) were sequentially added to a solution of vinylstannane **30** (286 mg, 0.30 mmol) in CH<sub>2</sub>Cl<sub>2</sub> (6.0 mL) at –40 °C. The reaction was allowed to stir for 3 h and was then quenched with a saturated aqueous solution of Na<sub>2</sub>S<sub>2</sub>O<sub>3</sub> (10 mL). The layers were separated and the aqueous layer was extracted with CH<sub>2</sub>Cl<sub>2</sub> (3 x 15 mL). The combined organic extracts were dried over anhydrous Na<sub>2</sub>SO<sub>4</sub>, filtered and concentrated *in vacuo*. The crude product was purified via flash chromatography (Hexanes/EtOAc (199:1)), providing **S12** (220 mg, 93%) as a colorless oil:  $R_f$  0.55 (Hexanes/EtOAc (19:5));  $[\alpha]_D^{22}$  +23.8° (c, CHCl<sub>3</sub>); IR (film) 2927, 2865, 2360, 1463, 1249, 1028 cm<sup>-1</sup>;  $^1\text{H}$  NMR (400 MHz,  $\text{CDCl}_3$ )  $\delta$  6.40 (s, 1H), 5.73 (td,  $J$  = 17.0, 9.8 Hz, 1H), 5.20 (d,  $J$  = 2.5 Hz, 1H), 5.15–5.03 (m, 3H), 4.17 (t,  $J$  = 6.6 Hz, 1H), 4.06 (t,  $J$  = 7.9 Hz, 1H), 3.86 (dd,  $J$

= 10.4, 8.7 Hz, 1H), 2.65 (d,  $J = 6.6$  Hz, 2H), 2.47 (dt,  $J = 9.3, 2.3$  Hz, 1H), 2.22–2.11 (m, 1H), 2.03–1.89 (m, 2H), 1.87–1.77 (m, 1H), 1.68 (s, 3H), 1.66–1.63 (m, 1H), 1.61 (s, 3H), 1.47–1.35 (m, 1H), 1.31–1.19 (m, 1H), 1.11–1.04 (m, 21H), 0.95 (d,  $J = 6.9$  Hz, 3H), 0.90–0.85 (s, 9H), 0.16 (s, 9H), 0.15 (s, 3H), 0.11 (s, 3H);  $^{13}\text{C}$  NMR (101 MHz,  $\text{CDCl}_3$ )  $\delta$  141.6, 139.8, 131.7, 124.7, 118.6, 117.3, 102.5, 70.7, 69.9, 59.4, 56.1, 45.3, 37.1, 30.4, 30.2, 26.4 (3 C), 26.2, 25.9, 19.4, 18.3, 18.1 (3 C), 18.0 (3 C), 18.0, 12.3 (3 C), –1.1 (3 C), –3.3, –3.5; HRMS-Cl (calcd for  $\text{C}_{37}\text{H}_{72}\text{O}_3\text{Si}_3\text{I} [\text{M}-\text{H}]^+$ ) 775.3828, found 775.3812.

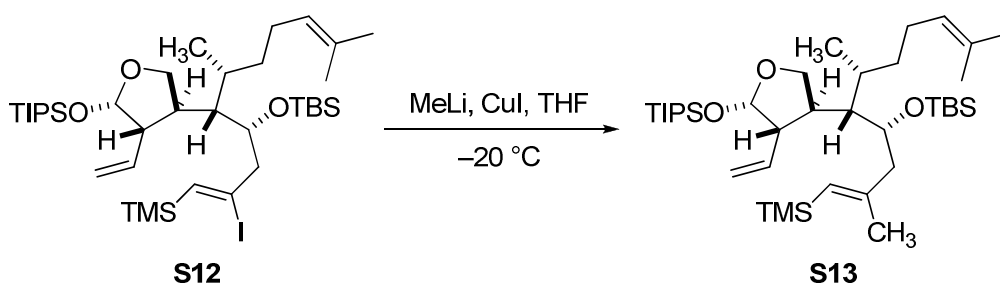

**tert-Butyldimethyl((4R,5S,6R,E)-2,6,10-trimethyl-5-((3S,4S,5S)-5-(triisopropylsilyloxy)-4-vinyltetrahydrofuran-3-yl)-1-(trimethylsilyl)undeca-1,9-dien-4-yloxy)silane (S13)** To a flame-dried flask under argon was added CuI (2.61 g, 13.72 mmol) and  $\text{Et}_2\text{O}$  (13.5 mL). The suspension was then cooled to  $-20\text{ }^\circ\text{C}$  and MeLi (1.6 M in  $\text{Et}_2\text{O}$ , 17.3 mL, 27.70 mmol) was added dropwise. Next, a solution of vinyl iodide **S12** (2.09 g, 2.69 mmol) in  $\text{Et}_2\text{O}$  (13.5 mL) was added dropwise via syringe. The reaction was allowed to warm slowly to  $0\text{ }^\circ\text{C}$  and then stirred an additional 1 h at this temperature. Filtration through a plug of silica gel and concentration of the filtrate provided crude **S13** as a yellow oil. The crude product was purified via flash chromatography (Hexanes/ $\text{EtOAc}$  (99:1)), providing **S13** (1.73g, 98%) as a colorless oil:  $R_f$  0.55 (Hexanes/ $\text{EtOAc}$  (19:1));  $[\alpha]_D^{20} +32.4^\circ$  (c 1.13,  $\text{CHCl}_3$ ); IR (film) 2956, 2866, 1463, 1248, 836  $\text{cm}^{-1}$ ;  $^1\text{H}$  NMR (400 MHz,  $\text{CDCl}_3$ )  $\delta$  5.72 (td,  $J = 17.0, 9.8$  Hz, 1H), 5.22 (s, 1H), 5.19 (d,  $J =$

2.4 Hz, 1H), 5.13–5.02 (m, 3H), 4.06 (t,  $J = 7.8$  Hz, 1H), 4.03–3.97 (m, 1H), 3.85 (dd,  $J = 10.4$ , 8.6 Hz, 1H), 2.49 (dt,  $J = 9.4$ , 2.1 Hz, 1H), 2.29–2.10 (m, 3H), 2.05–1.88 (m, 2H), 1.87–1.79 (m, 1H), 1.74 (s, 3H), 1.68 (s, 3H), 1.66–1.62 (m, 1H), 1.60 (s, 3H), 1.37–1.24 (m, 1H), 1.19–0.99 (m, 22H), 0.94 (d,  $J = 7.0$  Hz, 3H), 0.88 (s, 9H), 0.09–0.04 (m, 15H);  $^{13}\text{C}$  NMR (101 MHz,  $\text{CDCl}_3$ )  $\delta$  151.8, 139.7, 131.5, 127.7, 124.6, 116.8, 102.6, 70.9, 70.1, 59.4, 48.5, 44.9, 36.4, 30.2, 30.0, 26.2 (3 C), 26.1, 25.7, 22.2, 19.6, 18.1, 17.9 (3 C), 17.8 (3 C), 17.7, 12.1 (3 C), 0.0 (3 C), –3.8, –3.9; HRMS-Cl (calcd for  $\text{C}_{37}\text{H}_{73}\text{O}_3\text{Si}_3$   $[\text{M}-\text{CH}_3]^+$ ) 649.4862, found 649.4842.

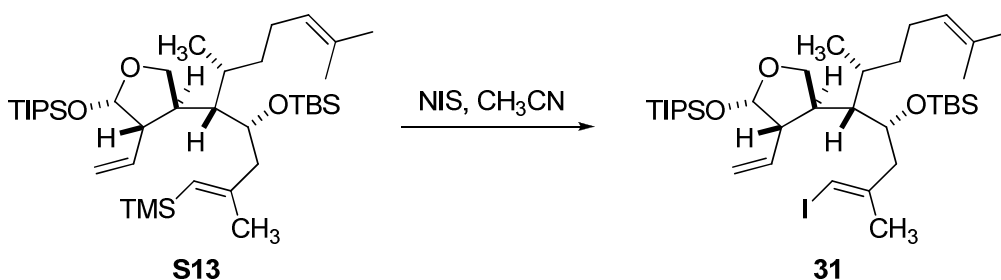

**tert-butyl((4R,5S,6R,E)-1-iodo-2,6,10-trimethyl-5-((3S,4S,5S)-5-(triisopropylsilyloxy)-4-vinyltetrahydrofuran-3-yl)undeca-1,9-dien-4-yloxy)dimethylsilane (31)** To a solution of vinylsilane **S13** (1.73 g, 2.60 mmol) in  $\text{CH}_3\text{CN}$  (52 mL) was added NIS (878 mg, 3.90 mmol). The reaction flask was capped, covered in tin foil, and stirred for 12 h. A saturated aqueous solution of  $\text{Na}_2\text{S}_2\text{O}_3$  (40 mL) was then added and the mixture was diluted in EtOAc (50 mL). The layers were separated and the aqueous layer was extracted with EtOAc (3 x 50 mL). The combined organic extracts were dried over anhydrous  $\text{Na}_2\text{SO}_4$ , filtered and concentrated. The crude product was purified via flash chromatography (Hexanes/EtOAc (199:1)), providing **31** (1.54g, 82%) as a colorless oil:  $R_f$  0.66 (Hexanes/EtOAc (9:1));  $[\alpha]_D^{25} +36.4^\circ$  (c 0.99,  $\text{CHCl}_3$ ); IR (film) 2928, 2865, 1638, 1463, 1255, 1047  $\text{cm}^{-1}$ ;  $^1\text{H}$  NMR (400 MHz,  $\text{CDCl}_3$ )  $\delta$  ;  $^{13}\text{C}$  NMR (101 MHz,  $\text{CDCl}_3$ )  $\delta$  144.9, 140.1, 131.9, 124.6, 117.0, 102.9, 78.8, 70.6, 70.5, 59.8, 45.0, 35.8,

30.1, 26.4, 26.2 (3 C), 25.9, 24.5, 20.5, 18.2, 18.1 (3 C), 18.0 (6 C), 12.2 (3 C), -3.8, -3.9;  
 HRMS-Cl (calcd for C<sub>35</sub>H<sub>66</sub>O<sub>3</sub>Si<sub>2</sub>I [M-H]<sup>+</sup>) 717.3590, found 717.3619.

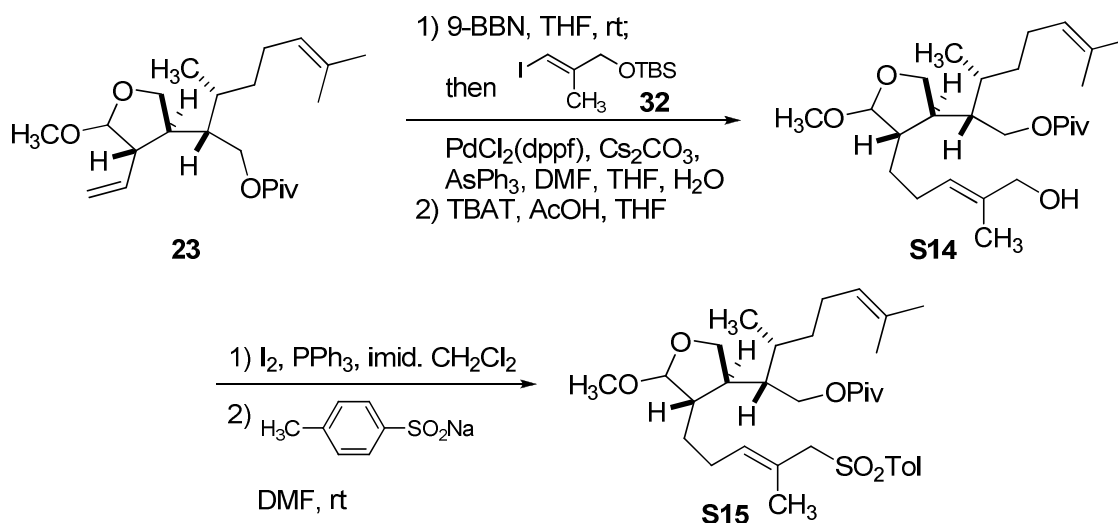

**(2S,3R)-2-((3S,4S)-5-methoxy-4-((E)-4-methyl-5-tosylpent-3-enyl)tetrahydrofuran-3-yl)-**

**3,7-dimethyloct-6-enyl pivalate (S15)** To a solution of 9-BBN dimer (91 mg, 0.37 mmol) in THF (0.9 mL), was added a solution of alkene **23** (137 mg, 0.37 mmol) in THF (0.6 mL). After stirring for 3 h at ambient temperature, TLC analysis revealed complete consumption of **23** and H<sub>2</sub>O (0.1 mL) was added. The resulting mixture was allowed to stir vigorously for 15 min and was then transferred via cannula to a flask containing vinyl iodide **32**<sup>4</sup> (175 mg, 0.56 mmol), PdCl<sub>2</sub>(dppf) (61 mg, 0.2 mmol), Cs<sub>2</sub>CO<sub>3</sub> (244 mg, 0.75 mmol), and AsPh<sub>3</sub> (23 mg, 0.075 mmol) in H<sub>2</sub>O (0.2 mL) and DMF (2.5 mL). The reaction was allowed to stir for 2 h and was then diluted in Et<sub>2</sub>O (10 mL) and washed with H<sub>2</sub>O (3 x 5 mL) and brine (5 mL). The organic layer was then dried over anhydrous Na<sub>2</sub>SO<sub>4</sub>, filtered and concentrated *in vacuo* to give an orange oil which was taken up in THF (2.2 mL) and cooled to 0 °C. To the solution were added AcOH (40 μL, 0.72 mmol) and TBAT (287 mg, 0.53 mmol). The reaction was allowed to warm slowly and was stirred overnight at ambient temperature. Dilution with H<sub>2</sub>O (3 mL) and CH<sub>2</sub>Cl<sub>2</sub> (5 mL) was followed by separation of the layers and extraction of the aqueous layer with CH<sub>2</sub>Cl<sub>2</sub> (3 x 5 mL).

The combined organic extracts were then dried over anhydrous  $\text{Na}_2\text{SO}_4$ , filtered and concentrated *in vacuo* to afford crude **S14** as an orange oil. Filtration through a plug of silica gel then gave **S14** (92 mg, 56% from **23**) as an oil of moderate purity that could be utilized without further purification in the next reaction.

**S14**:  $^1\text{H}$  NMR (400 MHz,  $\text{CDCl}_3$ )  $\delta$  5.44–5.35 (m, 1H), 5.10–5.02 (m, 1H), 4.86 (d,  $J = 4.7$  Hz, 0.4H), 4.69 (br. s, 0.6H), 4.21–4.13 (m, 1H), 4.06–3.95 (m, 4H), 3.64 (dd,  $J = 8.4, 6.5$  Hz, 0.4H), 3.56 (dd,  $J = 8.9, 8.6$  Hz, 0.6H), 3.35 (s, 1.2H), 3.32 (s, 1.8H), 2.20–1.85 (m, 7H), 1.78–1.55 (m, 3H), 1.68 (s, 3H), 1.65 (s, 3H), 1.60 (s, 3H), 1.53–1.30 (m, 2H), 1.21–1.17 (m, 9H), 0.94–0.84 (m, 3H).

Imidazole (23 mg, 0.33 mmol),  $\text{PPh}_3$  (67 mg, 0.26 mmol) and  $\text{I}_2$  (84 mg, 0.33 mmol) were sequentially added to a solution of alcohol **S14** (56 mg, 0.128 mmol) in  $\text{CH}_2\text{Cl}_2$  (2.6 mL) at  $0^\circ\text{C}$ . The reaction was allowed to stir for 10 min in the dark and was then diluted in hexanes and passed through a plug of silica gel. The filtrate was washed with saturated, aqueous  $\text{Na}_2\text{S}_2\text{O}_3$ , dried over anhydrous  $\text{Na}_2\text{SO}_4$ , filtered and concentrated *in vacuo*. The resulting oil was then taken up in DMF (2.6 mL) and sodium tolylsulfinate was added. The reaction was covered in aluminum foil, stirred overnight, diluted in  $\text{Et}_2\text{O}$  (15 mL), and washed with  $\text{H}_2\text{O}$  (3 x 10 mL) and brine (15 mL). The organic layer was then dried over anhydrous  $\text{Na}_2\text{SO}_4$ , filtered and concentrated *in vacuo*. The crude product was purified via flash chromatography (Hexanes/ $\text{EtOAc}$  (17:3)), providing **S15** (63 mg, 86% from **S14**) as a 58:42 inseparable mixture of C-19 diastereomers:  $R_f$  0.58 (Hexanes/ $\text{EtOAc}$  (3:1)); IR (film) 2921, 1725, 1480, 1456, 1316, 1285, 1157, 1033  $\text{cm}^{-1}$ ;  $^1\text{H}$  NMR (400 MHz,  $\text{CDCl}_3$ )  $\delta$  7.74–7.69 (m, 2H), 7.34–7.30 (m, 2H), 5.12–5.01 (m, 2H), 4.78 (d,  $J = 4.7$  Hz, 0.4H), 4.63 (d,  $J = 0.9$  Hz, 0.6H), 4.09–3.96 (m, 3H), 3.71–3.67 (m, 2H), 3.63 (dd,  $J = 8.5, 6.6$  Hz, 0.4H), 3.55 (dd,  $J = 8.9, 8.9$  Hz, 0.6H), 3.32 (s,

1.2H), 3.30 (s, 1.8H), 2.44 (s, 3H), 2.20–2.09 (m, 0.6H), 2.08–1.77 (m, 6.4H), 1.74 (s, 1.2H), 1.73 (s, 1.8H), 1.68 (s, 3H), 1.59 (s, 3H), 1.64–1.55 (m, 1H), 1.44–1.20 (m, 4H), 1.78–1.64 (m, 9H), 0.87 (d,  $J = 6.9$  Hz, 1.2H), 8.86 (d,  $J = 6.8$  Hz, 1.8H);  $^{13}\text{C}$  NMR (101 MHz,  $\text{CDCl}_3$ )  $\delta$  178.4, 144.4, 135.8, 135.1, 131.8, 131.7, 129.6, 128.5, 124.2, 123.8, 109.8, 105.4, 70.8, 70.4, 66.2, 63.8, 63.7, 54.6, 45.4, 49.6, 47.1, 44.9, 44.5, 44.4, 42.6, 38.7, 36.3, 35.9, 33.4, 33.3, 29.7, 28.2, 27.2, 27.0, 26.0, 25.8, 25.7, 21.6, 17.7, 16.8, 16.6, 15.8, 15.4; HRMS-CI (calcd for  $\text{C}_{32}\text{H}_{49}\text{O}_5\text{S} [\text{M}-\text{OCH}_3]^+$ ) 545.3295, found 545.3275.

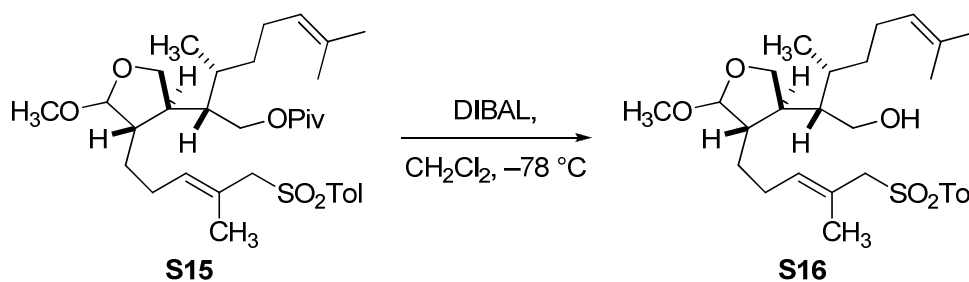

**(2S,3R)-2-((3S,4S)-5-methoxy-4-((E)-4-methyl-5-tosylpent-3-enyl)tetrahydrofuran-3-yl)-**

**3,7-dimethyloct-6-en-1-ol (S16)** To a solution of **S15** (73 mg, 0.126 mmol) in  $\text{CH}_2\text{Cl}_2$  (2.5 mL)

at  $-78\text{ }^\circ\text{C}$  was added DIBAL (1.0M in Hexanes, 316  $\mu\text{L}$ , 0.316 mmol). The reaction was allowed to stir for 30 min and was then quenched at  $-78\text{ }^\circ\text{C}$  with a saturated aqueous solution of sodium potassium tartrate (3 mL). The mixture was allowed to warm to ambient temperature and was then allowed to stir vigorously for 3 h. The layers were separated and the aqueous layer was extracted with  $\text{CH}_2\text{Cl}_2$  (3 x 10 mL). The combined organic extracts were then dried over anhydrous  $\text{Na}_2\text{SO}_4$ , filtered and concentrated *in vacuo*. The crude product was purified via flash chromatography (Hexanes/EtOAc (3:1)), providing **S16** (61 mg, 98%) as a 58:42 inseparable mixture of C-19 diastereomers:  $R_f$  0.63 (Hexanes/EtOAc (1:1)); IR (film) 3504 (br), 2923, 1457, 1314, 1133, 1086  $\text{cm}^{-1}$ ;  $^1\text{H}$  NMR (400 MHz,  $\text{CDCl}_3$ )  $\delta$  7.75–7.71 (m, 2H), 7.35–7.31 (m,



2H), 5.26–5.19 (m, 1H), 5.11–5.04 (m, 1H), 4.79 (d,  $J = 4.7$  Hz, 0.4H), 4.65 (d,  $J = 0.5$  Hz, 0.6H), 4.05–3.97 (m, 1H), 3.73–3.57 (m, 5H), 3.33 (s, 1.2H), 3.32 (s, 1.8H), 2.44 (s, 3H), 2.19–1.84 (m, 7H), 1.73 (s, 1.2H), 1.71 (s, 1.8H), 1.68 (s, 3H), 1.60 (s, 3H), 1.61–1.24 (m, 6H), 0.89–0.83 (m, 3H);  $^{13}\text{C}$  NMR (101 MHz,  $\text{CDCl}_3$ )  $\delta$  144.5, 136.3, 136.0, 135.9, 135.5, 131.6, 131.6, 129.6, 128.5, 124.4, 124.3, 123.9, 123.4, 109.9, 105.6, 76.3, 71.4, 71.2, 66.3, 62.0, 61.9, 54.6, 54.4, 48.4, 47.9, 47.8, 46.4, 45.3, 42.6, 36.4, 35.8, 34.0, 33.3, 27.9, 27.1, 27.0, 26.0, 25.9, 25.7, 21.6, 17.7, 16.8, 16.7, 15.8, 15.4; HRMS-CI (calcd for  $\text{C}_{27}\text{H}_{41}\text{O}_4\text{S} [\text{M}-\text{OCH}_3]^+$ ) 461.2720, found 461.2702.

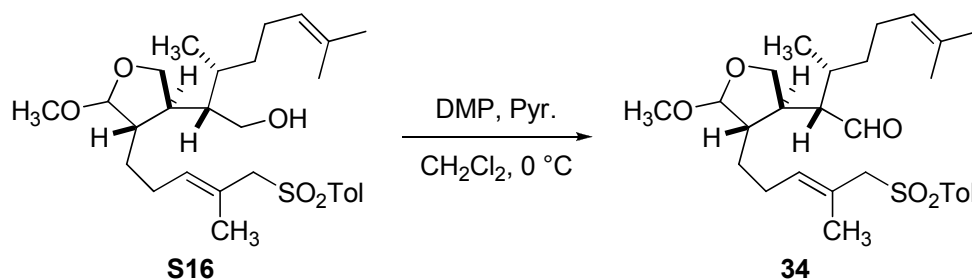

**(2S,3R)-2-((3R,4S)-5-methoxy-4-((E)-4-methyl-5-tosylpent-3-enyl)tetrahydrofuran-3-yl)-**

**3,7-dimethyloct-6-enal (34)** Pyridine (25  $\mu\text{L}$ , 0.31 mmol) and Dess-Martin periodinane (20 mg, 0.05 mmol) were sequentially added to a solution of alcohol **S16** (15 mg, 0.03 mmol) in  $\text{CH}_2\text{Cl}_2$  (0.7 mL) at 0  $^\circ\text{C}$  and the reaction was allowed to stir 1 h. The reaction was diluted in  $\text{Et}_2\text{O}$  (3 mL) and washed with a saturated, aqueous solutions of  $\text{NaHCO}_3$  (2 x 2 mL),  $\text{Na}_2\text{S}_2\text{O}_3$  (2 x 2 mL),  $\text{CuSO}_4$  (3 mL),  $\text{H}_2\text{O}$  (3 mL), and brine (3 mL). The organic layer was dried over anhydrous  $\text{Na}_2\text{SO}_4$ , filtered, and concentrated *in vacuo*. The crude product was purified via flash chromatography (Hexanes/ $\text{EtOAc}$  (17:3)), providing **34** (14.3 mg, 96%) as a 58:42 inseparable mixture of C-19 diastereomers:  $R_f$  0.50 (Hexanes/ $\text{EtOAc}$  (3:1)); IR (film) 2959, 2922, 2854, 1717, 1315, 1133, 1087  $\text{cm}^{-1}$ ;  $^1\text{H}$  NMR (400 MHz,  $\text{CDCl}_3$ )  $\delta$  9.74 (d,  $J = 3.3$  Hz, 0.6H), 9.69 (d,



chromatography (Hexanes/EtOAc (3:1)), providing **S17** (34 mg, 97%) as a 58:42 inseparable mixture of C-19 diastereomers:  $R_f$  0.34 (Hexanes/EtOAc (1:1)); IR (film) 3393 (br), 2920, 2359, 2342, 1449, 1375, 1021  $\text{cm}^{-1}$ ;  $^1\text{H}$  NMR (400 MHz,  $\text{CDCl}_3$ )  $\delta$  5.47–5.38 (m, 1H), 5.11–5.04 (m, 1H), 4.87 (d,  $J = 4.7$  Hz, 0.4H), 4.72 (br. s, 0.6H), 4.07–3.96 (m, 3H), 3.75–3.57 (m, 3H), 3.35 (s, 1.2H), 3.34 (s, 1.8H), 2.24–1.80 (m, 7H), 1.68 (br. s, 3H), 1.67 (s, 3H), 1.61 (s, 3H), 1.59–1.20 (m, 6H), 0.93–0.80 (m, 3H);  $^{13}\text{C}$  NMR (101 MHz,  $\text{CDCl}_3$ )  $\delta$  135.6, 135.1, 131.6, 126.2, 125.4, 124.4, 110.0, 110.0, 105.7, 71.5, 71.0, 69.0, 68.9, 62.1, 62.0, 54.7, 54.4, 48.0, 47.9, 47.7, 46.6, 45.3, 42.6, 39.2, 36.5, 35.7, 34.1, 33.9, 33.2, 28.5, 26.4, 26.1, 26.0, 25.9, 25.7, 17.7, 15.9, 15.4, 13.7, 13.6; HRMS-Cl (calcd for  $\text{C}_{21}\text{H}_{37}\text{O}_3$   $[\text{M}-\text{OH}]^+$ ) 337.2737, found 337.2731.

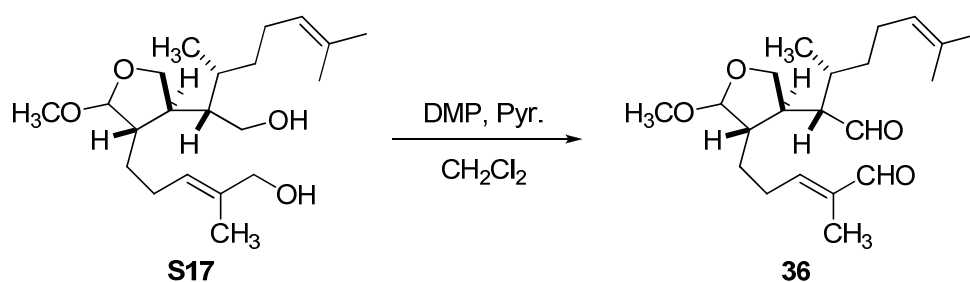

**(2S,3R)-2-((3R,4S)-5-methoxy-4-((E)-4-methyl-5-oxopent-3-enyl)tetrahydrofuran-3-yl)-3,7-dimethyloct-6-enal (36)** Pyridine (103  $\mu\text{L}$ , 1.29 mmol) and Dess-Martin periodinane (90 mg, 0.212 mmol) were sequentially added to a solution of diol **S17** (12.0 mg, 0.043 mmol) in  $\text{CH}_2\text{Cl}_2$  (0.86 mL) at 0  $^\circ\text{C}$  and the reaction was allowed to stir 1 h. The reaction was diluted in  $\text{Et}_2\text{O}$  (3 mL) and washed with saturated, aqueous solutions of  $\text{Na}_2\text{S}_2\text{O}_3$  (2 x 2 mL),  $\text{CuSO}_4$  (3 mL),  $\text{H}_2\text{O}$  (3 mL), and brine (3 mL). The organic layer was dried over anhydrous  $\text{Na}_2\text{SO}_4$ , filtered, and concentrated *in vacuo*. The crude product was purified via flash chromatography (Hexanes/EtOAc (22:3)), providing **36** (11.0 mg, 92%) as a 58:42 inseparable mixture of C-19 diastereomers:  $R_f$  0.55 (Hexanes/EtOAc (3:1)); IR (film) 2925, 2359, 2342, 1720, 1687, 1450,

1378, 1103, 1024  $\text{cm}^{-1}$ ;  $^1\text{H}$  NMR (400 MHz,  $\text{CDCl}_3$ )  $\delta$  9.80 (d,  $J = 2.9$  Hz, 0.6H), 9.75 (d,  $J = 4.9$  Hz, 0.4H), 9.40 (s, 0.6H), 9.39 (s, 0.4H), 6.47–6.40 (m, 1H), 5.11–5.01 (m, 1H), 4.84 (d,  $J = 4.6$  Hz, 0.4H), 4.70 (br. s, 0.6H), 4.11 (dd,  $J = 8.5, 8.4$  Hz, 0.4H), 4.04 (dd,  $J = 8.4, 8.4$  Hz, 0.6H), 3.60 (dd,  $J = 8.6, 6.9$  Hz, 0.4H), 3.56 (dd,  $J = 8.7, 8.5$  Hz, 0.6H), 3.35 (s, 1.2H), 3.30 (s, 1.8H), 2.65–2.58 (m, 1H), 2.43–2.17 (m, 3H), 2.15–1.95 (m, 3H), 1.88–1.46 (m, 3H), 1.74 (s, 1.8H), 1.73 (s, 1.2H), 1.69 (s, 1.8H), 1.68 (s, 1.2H), 1.62 (s, 1.8H), 1.60 (s, 1.2H), 1.45–1.20 (m, 2H), 1.04 (d,  $J = 7.1$  Hz, 1.2H), 0.94 (d,  $J = 7.0$  Hz, 1.8H);  $^{13}\text{C}$  NMR (101 MHz,  $\text{CDCl}_3$ )  $\delta$  205.1, 195.2, 153.3, 139.8, 132.3, 123.5, 109.2, 104.9, 69.3, 59.5, 54.5, 50.5, 41.6, 35.8, 33.5, 32.0, 27.5, 25.8, 25.7, 25.4, 22.6, 17.7, 15.3, 9.2; HRMS-Cl (calcd for  $\text{C}_{20}\text{H}_{31}\text{O}_3$   $[\text{M}-\text{OCH}_3]^+$ ) 319.2268, found 319.2263.

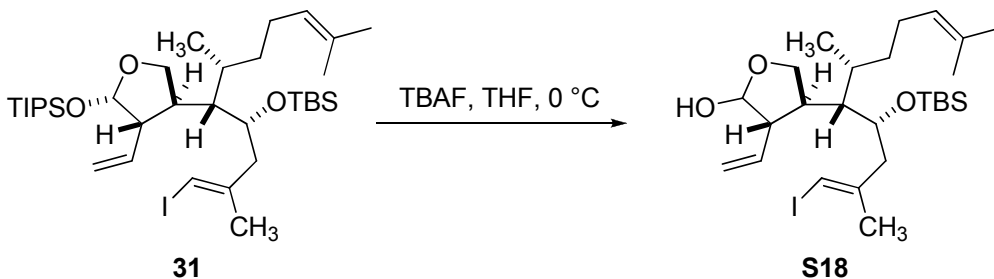

**(3S,4S)-4-((4R,5S,6R,E)-4-(tert-butyldimethylsilyloxy)-1-iodo-2,6,10-trimethylundeca-1,9-dien-5-yl)-3-vinyltetrahydrofuran-2-ol (S18)** To a solution of acetal **31** (1.21 g, 1.68 mmol) in THF (35 mL) at  $-40$  °C was added TBAF (1.0 M in THF, 1.68 mL, 1.68 mmol) dropwise. The reaction was allowed to warm to  $-15$  °C over 3 h and then quenched with  $\text{H}_2\text{O}$  (30 mL). The mixture was diluted with  $\text{Et}_2\text{O}$  (30 mL) and the layers were separated. The aqueous layer was extracted with  $\text{Et}_2\text{O}$  (3 x 25 mL) and the combined organic extracts were dried over  $\text{Na}_2\text{SO}_4$ , filtered and concentrated *in vacuo*. The crude product was purified via flash chromatography





min. The mixture was diluted in degassed THF (2.25 mL) and then added via syringe to a solution of Pd(PPh<sub>3</sub>)<sub>4</sub> (78 mg, 0.068 mmol) and NaOH (27 mg, 0.676 mmol) in degassed CH<sub>3</sub>CN (25.3 mL) and degassed H<sub>2</sub>O (1.70 mL) at ambient temperature. The reaction was then heated to 85 °C and was stirred for 18 h. The reaction was cooled to ambient temperature and filtered through Celite. The filtrate was washed with H<sub>2</sub>O (3 x 10 mL) and brine (3 x 10 mL). The organic layer was then dried over anhydrous Na<sub>2</sub>SO<sub>4</sub>, filtered and concentrated *in vacuo*. The crude mixture was taken up in hexanes (30 mL), filtered and concentrated *in vacuo* to give an orange oil. This crude material was dissolved in THF (3.8 mL) and to the resulting solution was added H<sub>2</sub>O (5.7 mL) and glacial acetic acid (1.9 mL). The mixture was heated to 85 °C, stirred for 4 h, cooled to 0 °C and slowly quenched with a saturated aqueous solution of NaHCO<sub>3</sub> (5 mL). The mixture was diluted in Et<sub>2</sub>O (10 mL), the layers were separated and the aqueous layer was extracted with Et<sub>2</sub>O (3 x 10 mL). The combined organic extracts were then washed with saturated aqueous NaHCO<sub>3</sub> (2 x 20 mL), H<sub>2</sub>O (20 mL) and brine (20 mL). The organic layer was dried over anhydrous Na<sub>2</sub>SO<sub>4</sub>, filtered and concentrated *in vacuo*. The crude product was purified via flash chromatography (Hexanes/EtOAc (50:1 to 93:7)), providing **38** (39 mg, 66%) as a 80:20 inseparable mixture of C-19 diastereomers: *R<sub>f</sub>* 0.32 (Hexanes/EtOAc (17:3)); IR (film) 3389, 2928, 2856, 2359, 2342, 1462, 1253, 1050 cm<sup>-1</sup>; <sup>1</sup>H NMR (400 MHz, CDCl<sub>3</sub>) δ 5.35–5.27 (m, 1H), 5.24 (dd, *J* = 9.0, 6.3 Hz, 0.2H), 5.17–5.09 (m, 0.8H), 5.09–5.05 (m, 0.2H), 5.01 (br. s, 0.8H), 4.20–4.06 (m, 1H), 4.02 (t, *J* = 8.6 Hz, 0.2H), 3.94 (t, *J* = 8.3 Hz, 0.8H), 3.87 (dd, *J* = 9.2, 8.7 Hz, 0.8H), 3.68 (dd, *J* = 8.3, 6.3 Hz, 0.2H), 2.68–2.51 (m, 1H), 2.51–2.30 (m, 2H), 2.26–2.12 (m, 1.6H), 2.11–1.86 (m, 4.4H), 1.83–1.65 (m, 4H), 1.79 (s, 3H), 1.68 (s, 3H), 1.62 (s, 3H), 1.47–1.31 (m, 1H), 1.29–1.09 (m, 1H), 0.93–0.87 (m, 9H), 0.85 (d, *J* = 6.7 Hz, 3H), 0.19–0.14 (m, 3H), 0.09–0.04 (m, 3H); <sup>13</sup>C NMR (101 MHz, CDCl<sub>3</sub>) δ 134.8, 134.0, 131.4,

131.3, 128.1, 126.3, 124.6, 124.5, 104.6, 100.1, 71.6, 71.4, 69.6, 68.7, 54.4, 49.9, 48.4, 48.3, 47.4, 46.9, 43.8, 39.4, 37.1, 36.9, 31.7, 31.5, 31.4, 29.7, 26.5, 26.2, 26.1, 26.0, 25.7, 24.8, 20.2, 18.6, 18.3, 18.0, 17.7, -2.3, -2.6, -5.0, ; HRMS-ESI (calcd for C<sub>26</sub>H<sub>48</sub>O<sub>3</sub>SiNa [M+Na]<sup>+</sup>) 459.3270, found 459.3274.

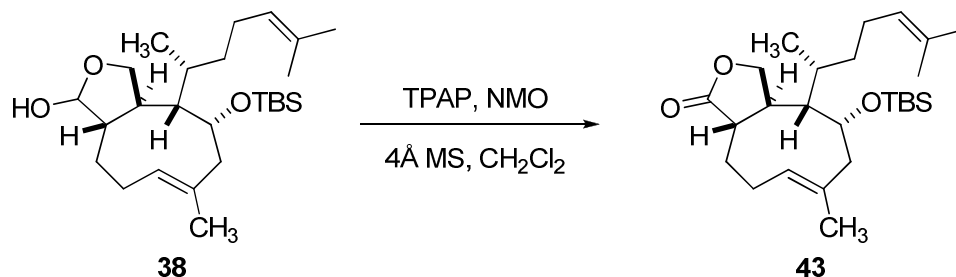

**(3a*S*,4*S*,5*R*,10a*S*,*E*)-5-(tert-butyldimethylsilyloxy)-7-methyl-4-((*R*)-6-methylhept-5-en-2-yl)-3,3a,4,5,6,9,10,10a-octahydro-1*H*-cyclonona[*c*]furan-1-one (43)** To a solution of lactol **38** (47 mg, 0.108 mmol) in CH<sub>2</sub>Cl<sub>2</sub> (11 mL) were added powdered, activated 4 Å MS (60 mg) and NMO (19 mg, 0.162 mmol). The suspension was allowed to stir for 10 min and then TPAP (3.8 mg, 0.011 mmol) was added in one portion. The reaction was allowed to stir for 45 minutes and was then filtered through a plug of silica gel. The filtrate was concentrated *in vacuo* to give a dark oil. The crude product was purified via flash chromatography (Hexanes/EtOAc (50:1)), providing **43** (37 mg, 79%) as a colorless oil: *R*<sub>f</sub> 0.46 (Hexanes/EtOAc (17:3)); [α]<sub>D</sub><sup>22</sup> -24.0° (c 0.59, CHCl<sub>3</sub>); IR (film) 2956, 2927, 2856, 2359, 1770, 1039 cm<sup>-1</sup>; <sup>1</sup>H NMR (400 MHz, CDCl<sub>3</sub>) δ 5.30–5.19 (m, 1H), 5.13–5.02 (m, 1H), 4.26 (t, *J* = 9.5 Hz, 1H), 4.23–4.19 (m, 1H), 4.04 (dd, *J* = 8.8, 7.5 Hz, 1H), 2.72–2.60 (m, 1H), 2.54–2.42 (m, 1H), 2.40–2.23 (m, 2H), 2.28–2.23 (m, 1H), 2.23–2.10 (m, 1H), 2.09–1.97 (m, 3H), 1.97–1.84 (m, 2H), 1.79 (s, 3H), 1.69–1.63 (m, 1H), 1.68 (s, 3H), 1.60 (s, 3H), 1.28–1.14 (m, 1H), 1.12–1.01 (m, 1H), 0.94 (d, *J* = 6.4 Hz, 3H), 0.89 (s, 9H), 0.14 (s, 3H), 0.05 (s, 3H); <sup>13</sup>C NMR (101 MHz, CDCl<sub>3</sub>) δ 180.7, 135.1, 132.3, 126.2,



123.7, 71.8, 69.6, 50.1, 48.0, 47.7, 39.3, 35.4, 31.0, 29.8, 26.0 (3 C), 25.6, 25.6, 25.0, 20.3, 18.3, 17.9, 17.7, -3.3, -4.5; HRMS-ESI (calcd for C<sub>26</sub>H<sub>46</sub>O<sub>3</sub>SiNa [M+Na]<sup>+</sup>) 457.3114, found 457.3135.

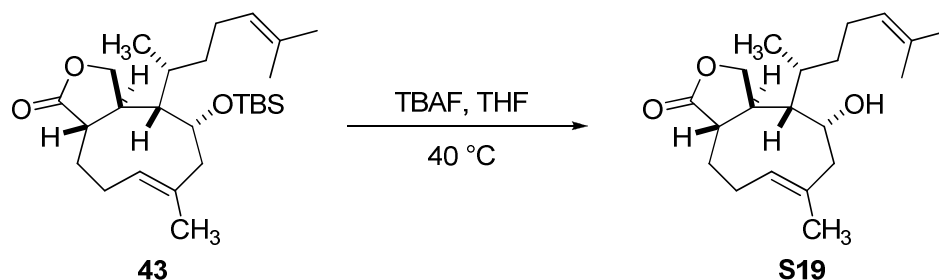

**(3a*S*,4*S*,5*R*,10a*S*,*E*)-5-hydroxy-7-methyl-4-((*R*)-6-methylhept-5-en-2-yl)-3,3a,4,5,6,9,10,10a-octahydro-1*H*-cyclonona[*c*]furan-1-one (S19)** To a solution of **43** (11.8 mg, 0.027 mmol) in THF (1.0 mL) at ambient temperature was added TBAF (1.0 M in THF, 0.20 mL, 0.200 mmol). The reaction was then warmed to 40 °C and stirred for 10 h. The reaction was cooled to ambient temperature and quenched with H<sub>2</sub>O (1 mL) and diluted in Et<sub>2</sub>O (2 mL). The layers were separated and the aqueous layer was extracted with Et<sub>2</sub>O (3 x 2 mL). The combined organic extracts were dried over anhydrous Na<sub>2</sub>SO<sub>4</sub>, filtered and concentrated *in vacuo*. The crude product was purified via flash chromatography (Hexanes/EtOAc (50:1 to 93:7)), providing **S19** (7.2 mg, 83%) as a colorless oil: *R*<sub>f</sub> 0.30 (Hexanes/EtOAc (3:1)); [α]<sub>D</sub><sup>25</sup> +14.0° (c 0.72, CHCl<sub>3</sub>); IR (film) 3477 (br), 2916, 2854, 1756, 1445, 1003 cm<sup>-1</sup>; <sup>1</sup>H NMR (400 MHz, CDCl<sub>3</sub>) δ 5.18–5.03 (m, 2H), 4.33 (t, *J* = 8.1 Hz, 1H), 4.20–4.13 (m, 1H), 3.96 (dd, *J* = 9.7, 8.6 Hz, 1H), 2.74–2.61 (m, 1H), 2.42–2.04 (m, 8H), 2.03–1.95 (m, 2H), 1.82 (s, 3H), 1.80–1.74 (m, 1H), 1.69 (s, 3H), 1.68–1.64 (m, 1H), 1.62 (s, 3H), 1.35–1.17 (m, 2H), 0.90 (d, *J* = 6.7 Hz, 3H); <sup>13</sup>C NMR (101 MHz, CDCl<sub>3</sub>) δ 179.3, 133.7, 132.1, 128.9, 123.9, 70.2 (2 C), 49.1, 44.8, 44.1, 39.1, 36.9, 31.2,

27.1, 26.1, 25.7, 25.4, 20.2, 17.8, 17.6; HRMS-Cl (calcd for C<sub>20</sub>H<sub>33</sub>O<sub>3</sub> [M+H]<sup>+</sup>) 321.2424, found 321.2411.

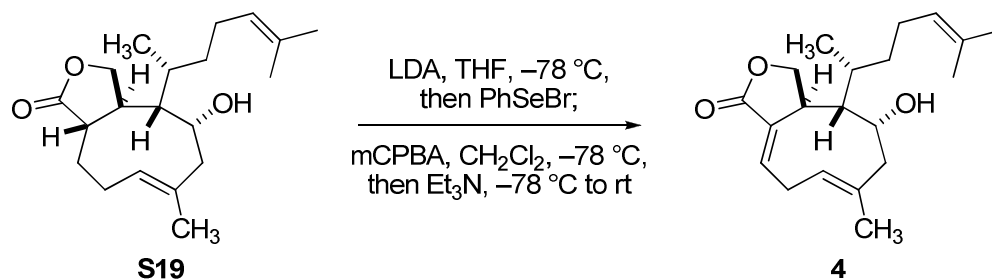

**4-Hydroxydictyolactone (4)** To a solution of **S19** (7.2 mg, 0.022 mmol) in THF (440  $\mu\text{L}$ ) at  $-78^\circ\text{C}$  was added freshly prepared lithium diisopropylamide (1.0M in THF, 135  $\mu\text{L}$ , 0.135 mmol) dropwise. The reaction was allowed to stir for 30 min and then a solution of PhSeBr (13 mg, 0.055 mmol) in THF (50  $\mu\text{L}$ ) was added slowly. After 45 minutes at  $-78^\circ\text{C}$ , the reaction was diluted with a saturated aqueous solution of  $\text{NH}_4\text{Cl}$  (500  $\mu\text{L}$ ) and  $\text{Et}_2\text{O}$  (1 mL). The layers were separated and the aqueous layer was extracted with  $\text{Et}_2\text{O}$  (3 x 2 mL). The combined organic extracts were dried over anhydrous  $\text{Na}_2\text{SO}_4$ , filtered and concentrated *in vacuo* to afford the crude  $\alpha$ -selenylester that was used without purification in the next reaction.

To a solution of the  $\alpha$ -selenylester in  $\text{CH}_2\text{Cl}_2$  (1.3 mL) at  $-78^\circ\text{C}$  was added a solution of *m*CPBA (3.4 mg, 0.020 mmol) in  $\text{CH}_2\text{Cl}_2$  (100  $\mu\text{L}$ ). The reaction was allowed to stir for 1 h and then  $\text{Et}_3\text{N}$  (50  $\mu\text{L}$ ) was added. The reaction was allowed to warm to ambient temperature and was stirred for 24 h. The reaction was partitioned between  $\text{H}_2\text{O}$  (1 mL) and  $\text{Et}_2\text{O}$  (2 mL) and the layers were separated. The aqueous layer was extracted with  $\text{Et}_2\text{O}$  (3 x 2 mL) and the combined organic extracts were dried over anhydrous  $\text{Na}_2\text{SO}_4$ , filtered and concentrated *in vacuo*. The crude product was then purified by preparative TLC (Hexanes/ $\text{EtOAc}$  (13:7)) to give synthetic 4-hydroxydictyolactone (**4**) (3.4 mg, 55% from **S19**) as a white foam:  $R_f$  0.21 (Hexanes/ $\text{EtOAc}$

(3:1));  $[\alpha]_{\text{D}}^{23} -175.2$  (c 0.13,  $\text{CCl}_4$ ); IR (film) 3448 (br), 2917, 1735, 1637, 1183  $\text{cm}^{-1}$ ;  $^1\text{H}$  NMR (400 MHz,  $\text{CDCl}_3$ )  $\delta$  6.92 (dt,  $J = 7.6, 2.0$  Hz, 1H), 5.30 (br. dd,  $J = 11.7, 4.1$  Hz, 1H), 5.01 (appt. t,  $J = 7.0$  Hz, 1H), 4.43 (dd,  $J = 9.5, 1.0$  Hz, 1H), 4.31–4.27 (m, 1H), 4.08 (dd,  $J = 9.7, 7.9$  Hz, 1H), 3.39 (br. d,  $J = 7.3$  Hz, 1H), 3.18 (ddt,  $J = 17.5, 11.6, 1.8$  Hz, 1H), 2.95 (ddd,  $J = 17.4, 7.3, 4.3$  Hz, 1H), 2.31 (br. d,  $J = 12.8$  Hz, 1H), 2.17 (dd,  $J = 13.0, 4.0$  Hz, 1H), 2.02 (br. s, 1H), 1.95–1.84 (m, 2H), 1.88 (br. s, 3H), 1.71–1.63 (m, 1H), 1.65 (br. s, 3H), 1.55 (br. s, 3H), 1.22–1.10 (m, 2H), 1.06 (d,  $J = 6.7$  Hz, 3H);  $^{13}\text{C}$  NMR (101 MHz,  $\text{CDCl}_3$ )  $\delta$  173.4, 139.4, 136.1, 135.4, 131.9, 125.3, 123.9, 72.7, 68.7, 51.0, 49.1, 37.9, 35.7, 32.3, 29.4, 25.9, 25.6, 20.0, 18.1, 17.7; HRMS-Cl (calcd for  $\text{C}_{20}\text{H}_{31}\text{O}_3$   $[\text{M}+\text{H}]^+$ ) 319.2268, found 319.2255.

## Comparison of $^1\text{H}$ and $^{13}\text{C}$ NMR Spectra of Natural and Synthetic 4-Hydroxydictyolactone (**4**) (Major Conformer)

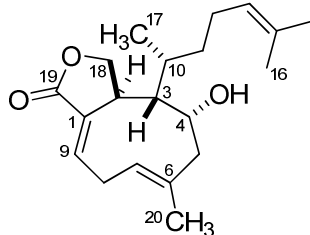

**4** (4-hydroxydictyolactone)

| H           | Natural <sup>5</sup>                 | Synthetic                            |
|-------------|--------------------------------------|--------------------------------------|
| 2           | 3.39 (br. d, $J = 7.8$ Hz)           | 3.39 (br. d, $J = 7.3$ Hz)           |
| 3           | 2.02 (br. s)                         | 2.02 (br. s)                         |
| 4           | 4.28 (m)                             | 4.31–4.27 (m)                        |
| 5 $\alpha$  | 2.17 (dd, $J = 12.8, 2.0$ Hz)        | 2.17 (dd, $J = 13.0, 4.0$ Hz)        |
| 5 $\beta$   | 2.32 (dd, $J = 12.8, 4.3$ Hz)        | 2.31 (br. d, $J = 12.8$ Hz)          |
| 7           | 5.30 (br. dd, $J = 11.4, 4.2$ Hz)    | 5.30 (br. dd, $J = 11.7, 4.1$ Hz)    |
| 8 $\alpha$  | 3.19 (ddt, $J = 17.6, 11.4, 2.3$ Hz) | 3.18 (ddt, $J = 17.5, 11.6, 1.8$ Hz) |
| 8 $\beta$   | 2.94 (ddd, $J = 17.6, 7.5, 4.2$ Hz)  | 2.95 (ddd, $J = 17.4, 7.3, 4.3$ Hz)  |
| 9           | 6.92 (dt, $J = 7.5, 2.3$ Hz)         | 6.92 (dt, $J = 7.6, 2.0$ Hz)         |
| 10          | 1.61 (m)                             | 1.71–1.63 (m)                        |
| 11          | 1.22–1.17 (m)                        | 1.22–1.10 (m)                        |
| 12          | 1.92 (m)                             | 1.95–1.84 (m)                        |
| 13          | 5.02 (sept. t, $J = 7.2, 1.5$ Hz)    | 5.01 (appt. t, $J = 7.0$ Hz)         |
| 15          | 1.66 (br. s)                         | 1.65 (br. s)                         |
| 16          | 1.56 (br. s)                         | 1.55 (br. s)                         |
| 17          | 1.06 (d, $J = 6.7$ Hz)               | 1.06 (d, $J = 6.7$ Hz)               |
| 18 $\alpha$ | 4.09 (dd, $J = 9.5, 7.8$ Hz)         | 4.08 (dd, $J = 9.7, 7.9$ Hz)         |
| 18 $\beta$  | 4.44 (dd, $J = 9.5, 1.2$ Hz)         | 4.43 (dd, $J = 9.5, 1.0$ Hz)         |
| 20          | 1.89 (d, $J = 1.3$ Hz)               | 1.88 (br. s)                         |

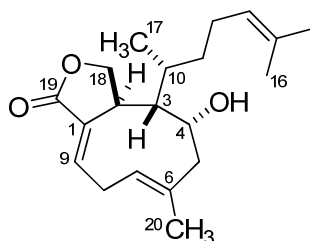

4 (4-hydroxydictyolactone)

| C  | Natural <sup>5</sup> | Synthetic | $\Delta$ ( $\delta$ ppm) |
|----|----------------------|-----------|--------------------------|
| 1  | 136.08               | 136.07    | 0.01                     |
| 2  | 35.74                | 35.75     | 0.01                     |
| 3  | 50.97                | 50.99     | 0.02                     |
| 4  | 72.71                | 72.74     | 0.03                     |
| 5  | 49.05                | 49.06     | 0.01                     |
| 6  | 135.36               | 135.38    | 0.02                     |
| 7  | 125.28               | 125.30    | 0.02                     |
| 8  | 29.42                | 29.43     | 0.01                     |
| 9  | 139.39               | 139.36    | 0.03                     |
| 10 | 32.25                | 32.26     | 0.01                     |
| 11 | 37.86                | 37.88     | 0.02                     |
| 12 | 25.87                | 25.89     | 0.02                     |
| 13 | 123.90               | 123.91    | 0.01                     |
| 14 | 131.87               | 131.87    | 0.00                     |
| 15 | 25.64                | 25.64     | 0.00                     |
| 16 | 17.69                | 17.69     | 0.00                     |
| 17 | 18.13                | 18.14     | 0.01                     |
| 18 | 68.73                | 68.72     | 0.01                     |
| 19 | 173.39               | 173.36    | 0.03                     |
| 20 | 20.00                | 19.99     | 0.01                     |

## References

- (1) Marshall, J. M.; Trometer, J. D.; Cleary, D. G. *Tetrahedron* **1989**, *45*, 391–402.
- (2) Hopf, H.; Böhm, I.; Kleinschroth, J. *Org. Synth.* **1981**, *60*, 41.
- (3) Ohtani, I.; Kusumi, T.; Kashman, Y.; Kakisawa, H. *J. Am. Chem. Soc.* **1991**, *113*, 4092–4096.
- (4) Lipshutz, B. H.; Lee, C.-T.; Servesko, J. M. *Org. Lett.* **2007**, *9*, 4713–4716.
- (5) Guella, G.; Chiasera, G.; N'Diaye, I.; Pietra, F. *Helv. Chim. Acta* **1994**, *77*, 1203–1221.

3-37-1H

Archive directory: /i400/dob/vnmrSYS/data  
File:

Pulse Sequence: s2pul

Solvent: cdc13

Temp. 25.0 C / 298.1 K

User: 1-12-87

File:

INOVA-400 "nrmrSun3"

Relax. delay 1.000 sec

Pulse 45.0 degrees

Acq. time 2.003 sec

Width 6402.0 Hz

16 repetitions

OBSERVE H1, 400.1180371 MHz

DATA PROCESSING

Line broadening 0.5 Hz

FT size 65536

Total time 0 min, 48 sec

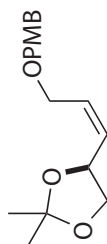

S2

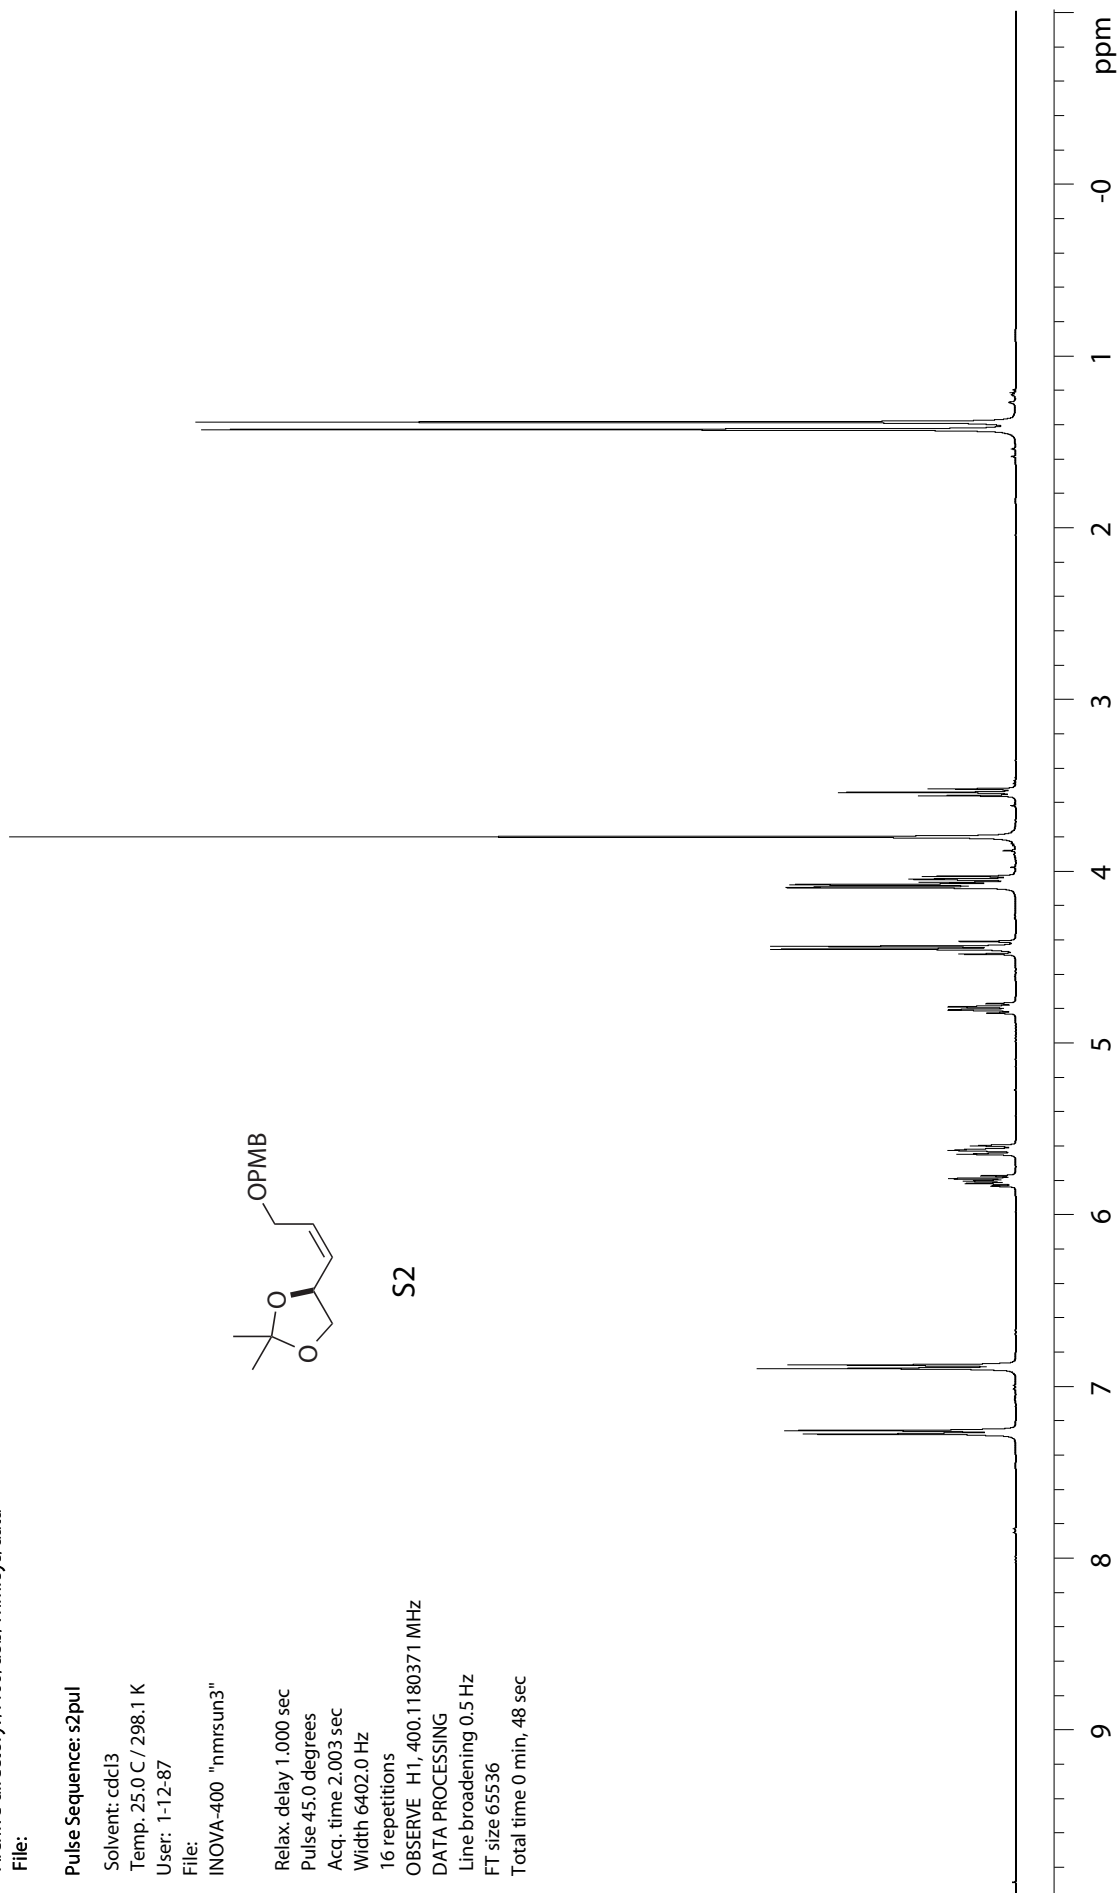

3-37-13C

Archive directory: /i400/dob/vnmrsys/data  
File:

Pulse Sequence: s2pul

Solvent: cdc13

Temp. 25.0 C / 298.1 K

File:

INOVA-400 "nmsun3"

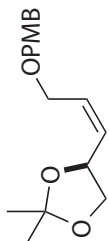

S2

Relax. delay 1.500 sec

Pulse 29.8 degrees

Acq. time 0.651 sec

Width 25157.2 Hz

130 repetitions

OBSERVE C13, 100.6097722 MHz

DECOUPLE H1, 400.1200527 MHz

Power 41 dB

continuously on

WALTZ-16 modulated

DATA PROCESSING

Line broadening 2.0 Hz

FT size 65536

Total time 9 min, 12 sec

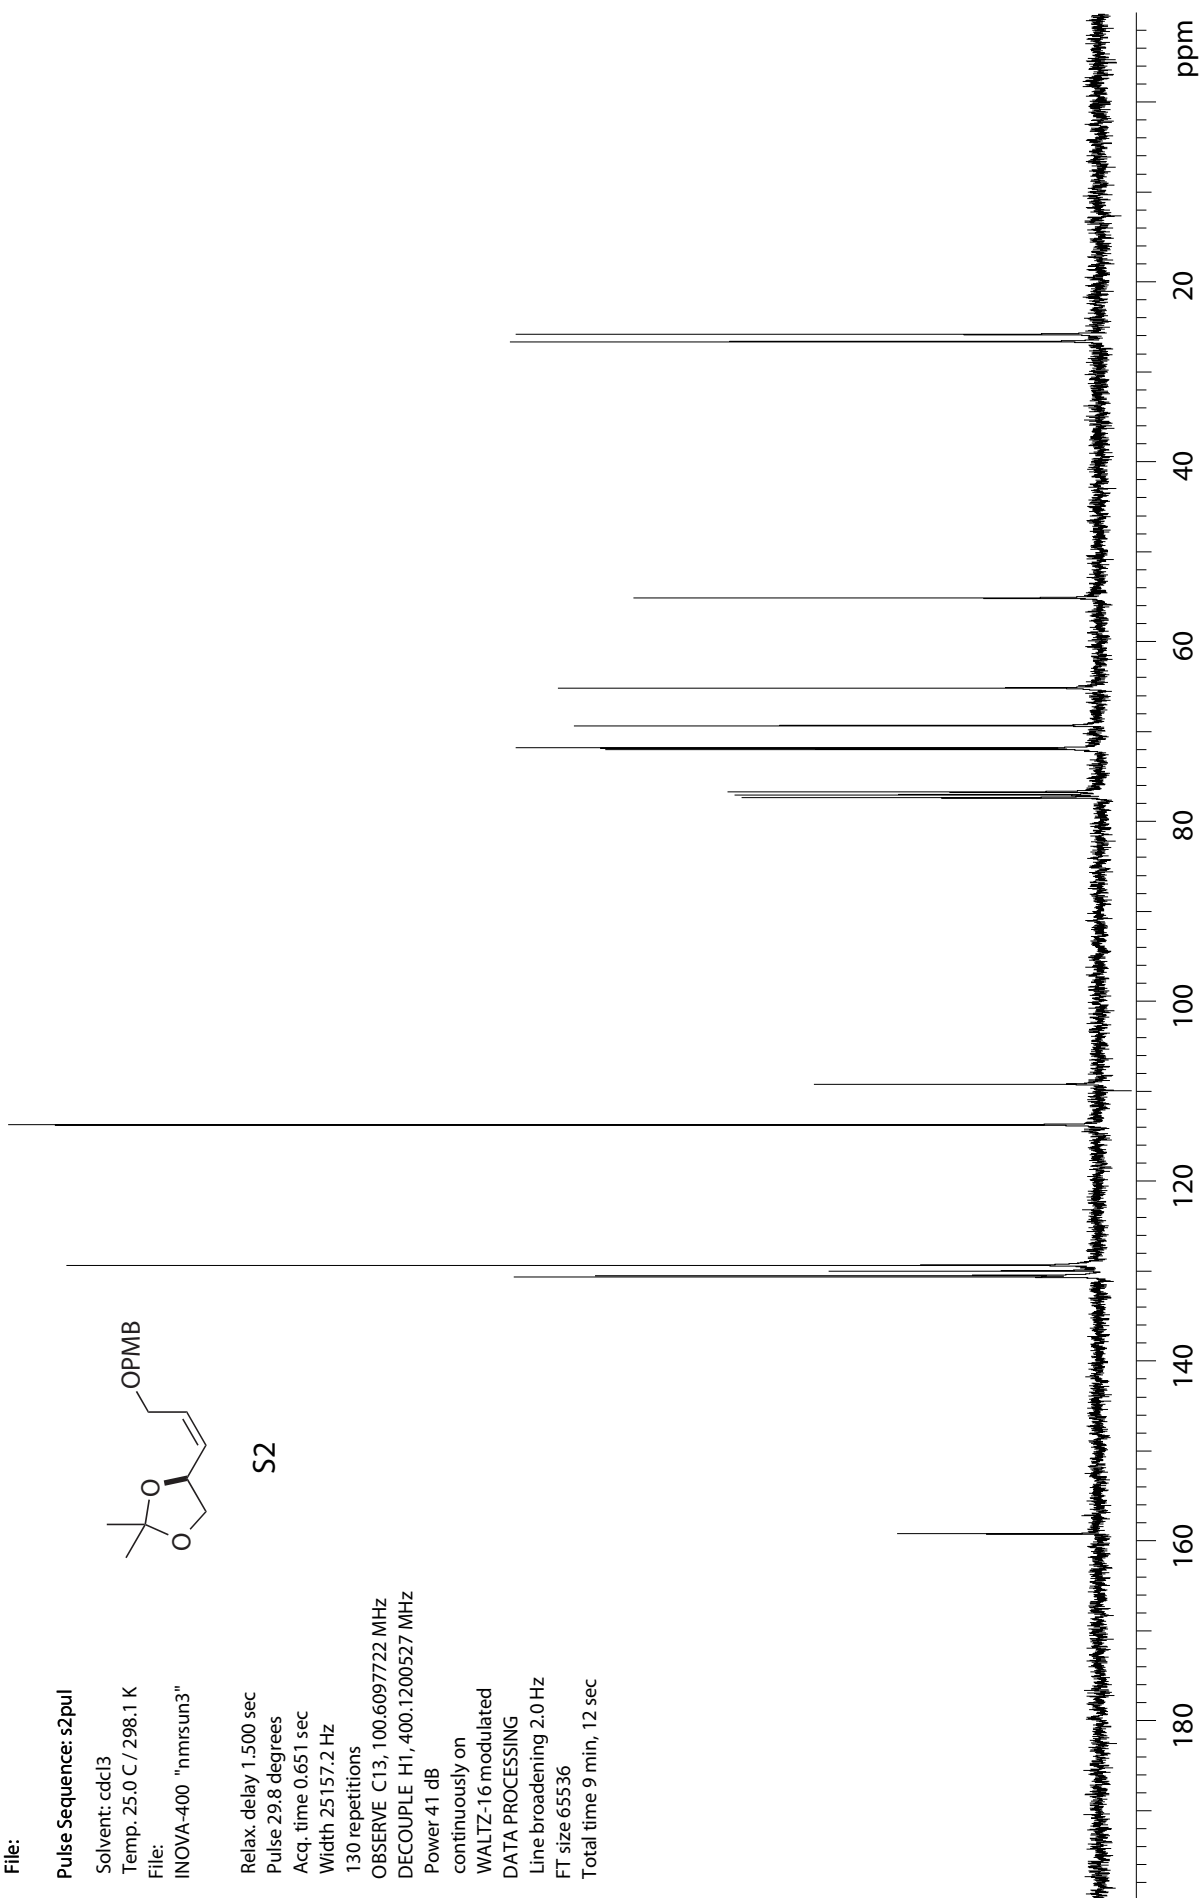

5-299-1H

Archive directory: /vxr400/vnmr1/vnmrsys/data  
File:

Pulse Sequence: s2pul

Solvent: cdcl3

Temp. 25.0 C / 298.1 K

Operator: maw

File:

INOVA-400 "nrmisun3"

Relax. delay 1.000 sec

Pulse 45.0 degrees

Acq. time 2.730 sec

Width 6000.6 Hz

16 repetitions

OBSERVE H1, 400.1083663 MHz

DATA PROCESSING

Line broadening 0.3 Hz

FT size 65536

Total time 0 min, 59 sec

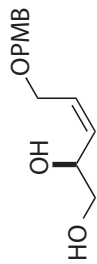

S3

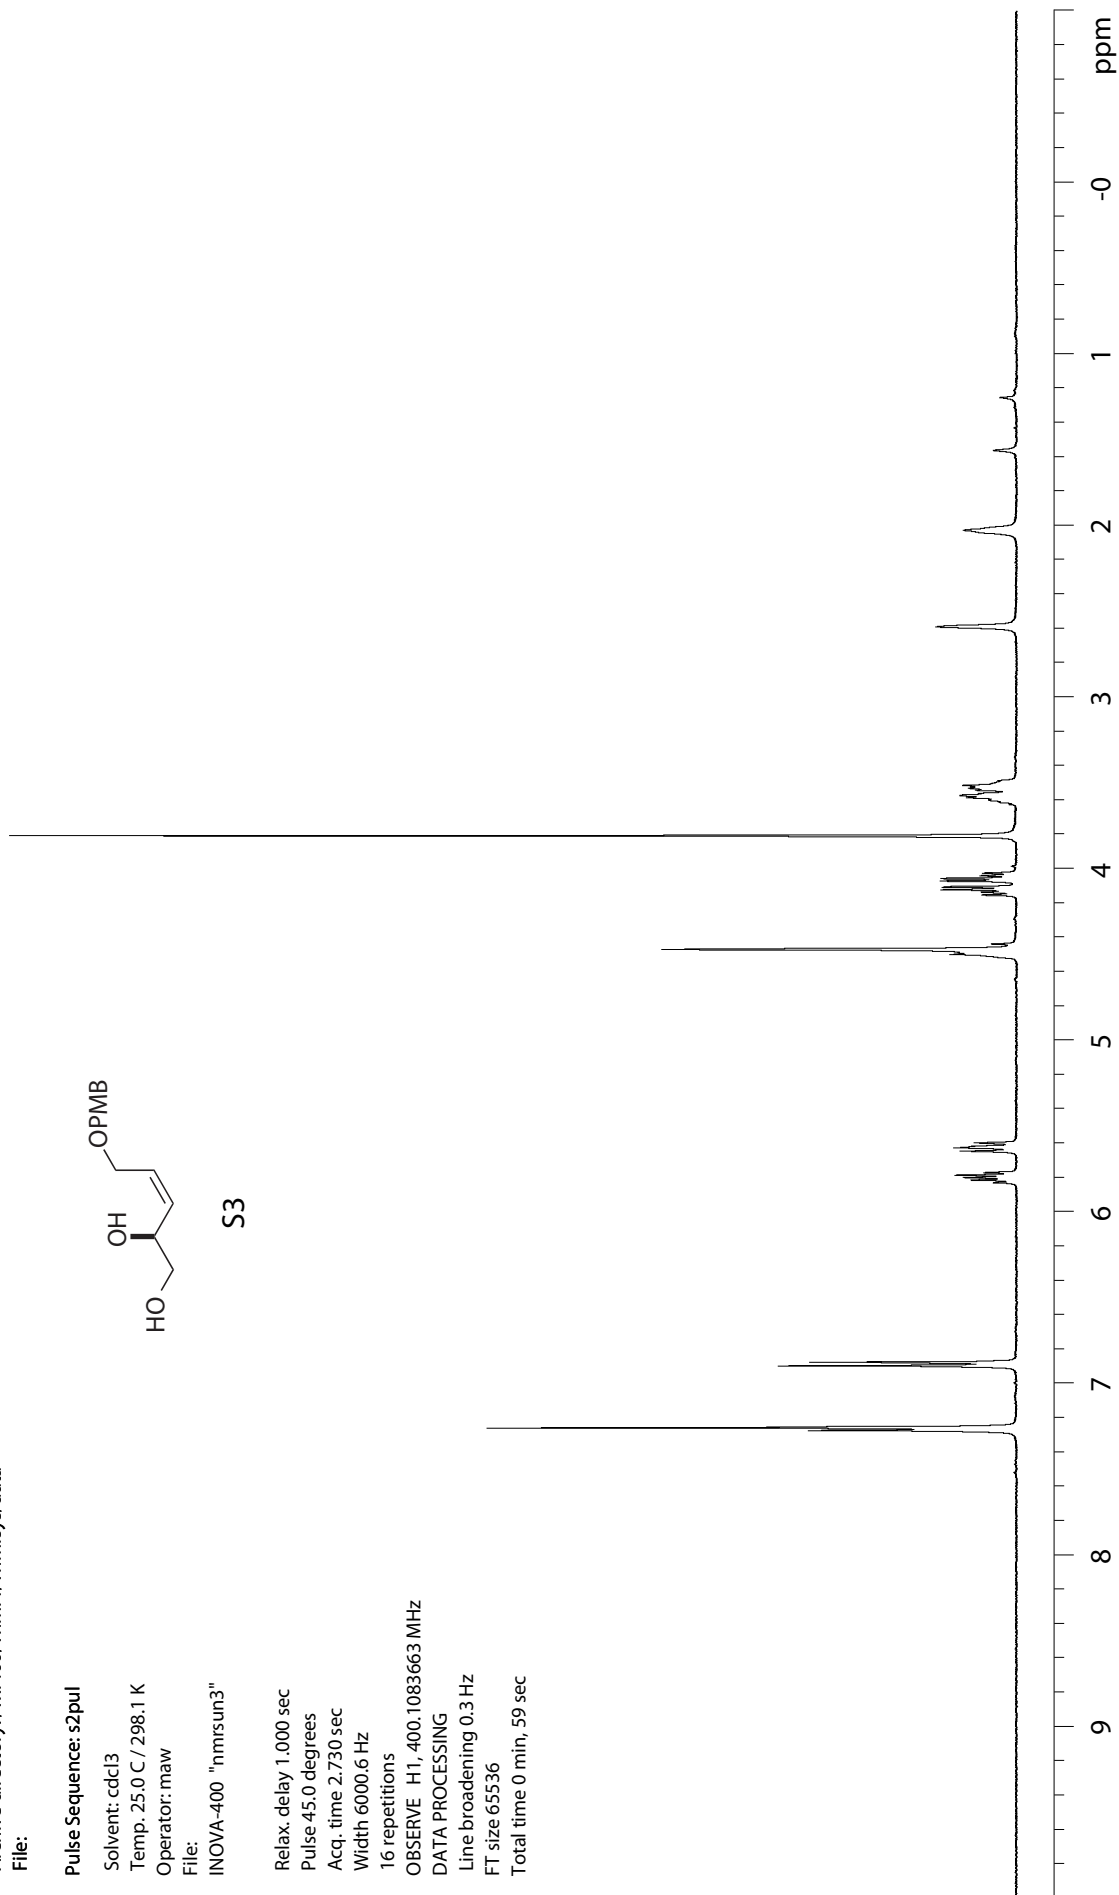



5-299-13C

Archive directory: /i400/dob/vnmrSYS/data  
File:

Pulse Sequence: s2pul

Solvent: cdc13

Temp. 25.0 C / 298.1 K

Operator: maw

File:

INOVA-400 "nmrSun3"

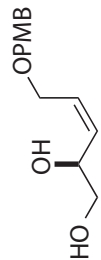

S3

Relax. delay 1.500 sec

Pulse 29.7 degrees

Acq. time 0.651 sec

Width 25157.2 Hz

610 repetitions

OBSERVE C13, 100.6073327 MHz

DECOUPLE H1, 400.1103789 MHz

Power 43 dB

continuously on

WALTZ-16 modulated

DATA PROCESSING

Line broadening 2.0 Hz

FT size 65536

Total time 1 hr, 32 min, 9 sec

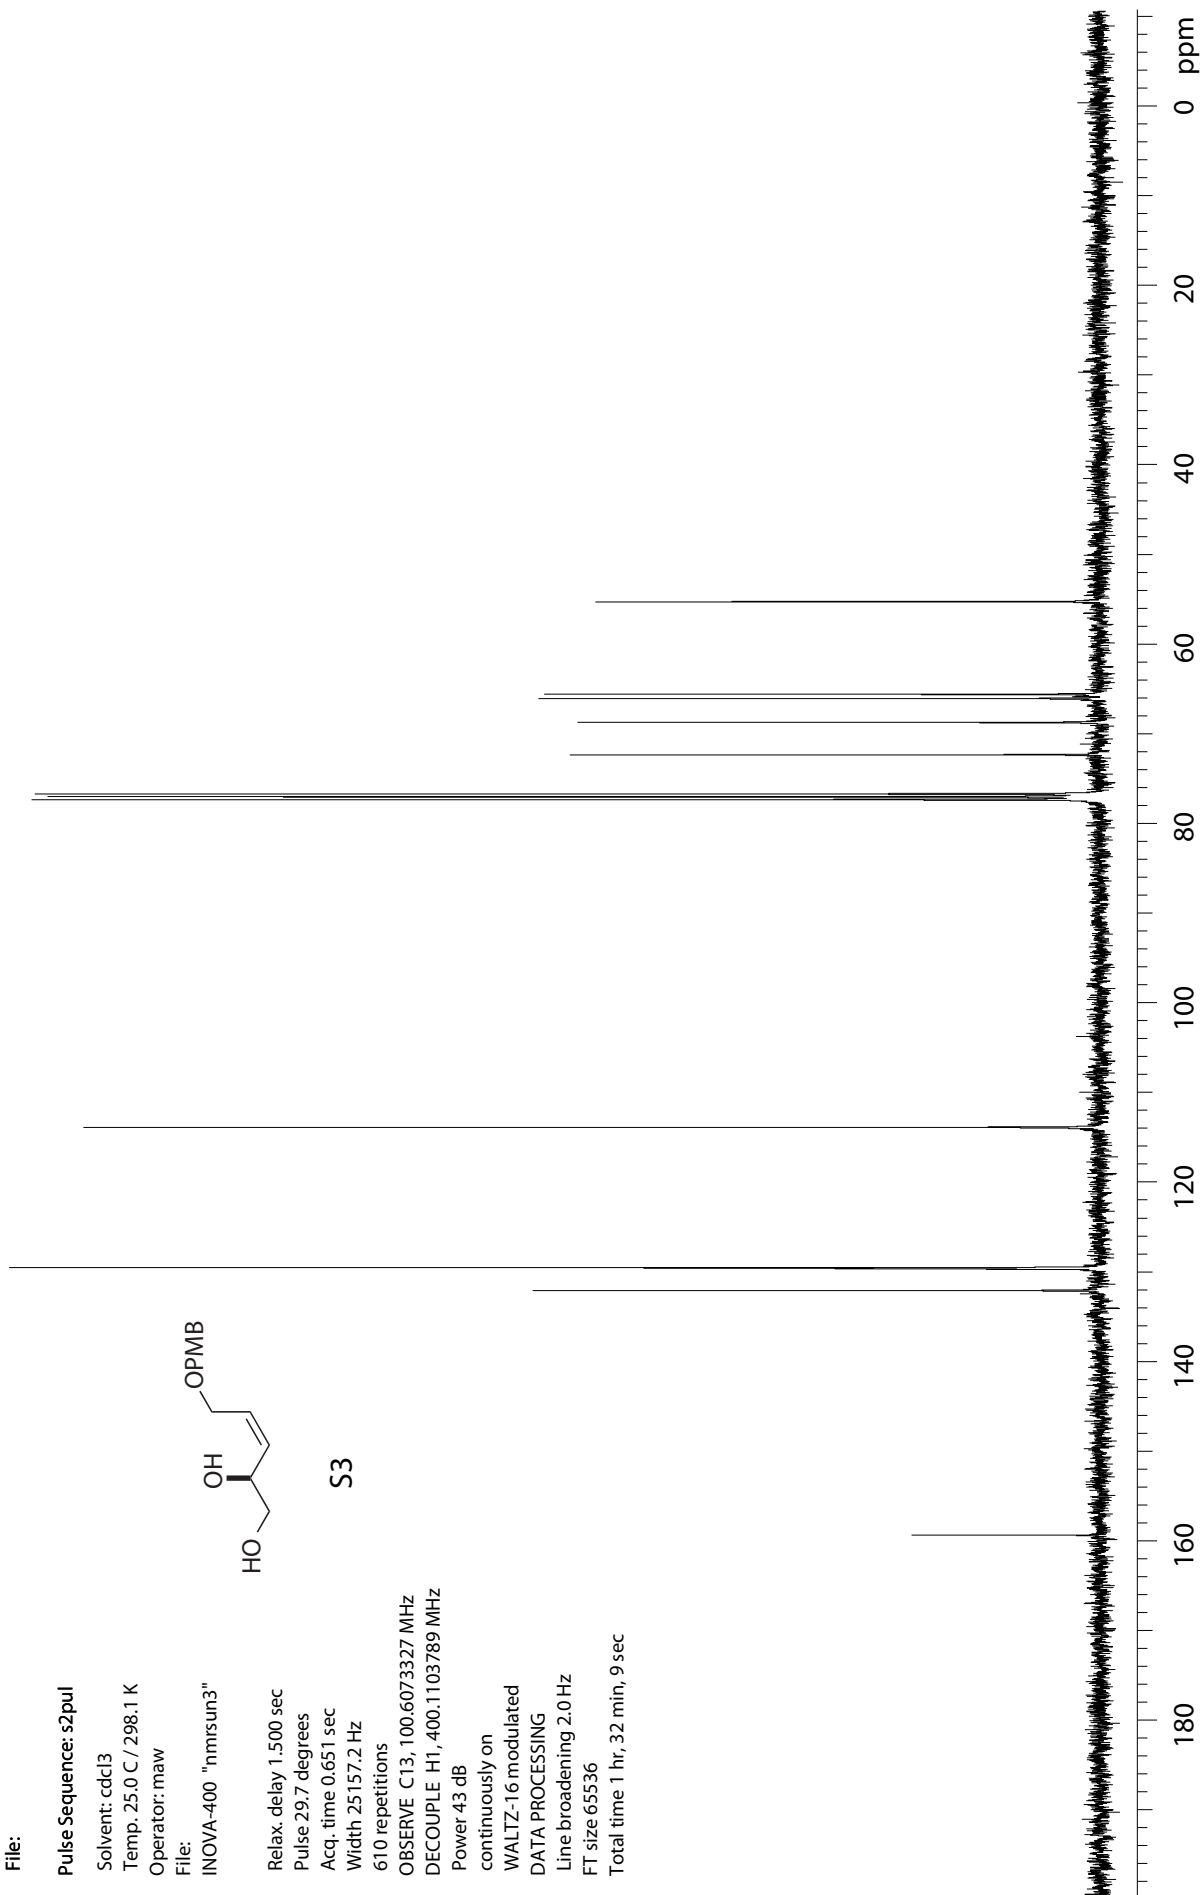

5-301-1H

Archive directory: /vxr400/vnmr1/vnmr1sys/data  
File:

Pulse Sequence: s2pul

Solvent: cdcl3  
Temp. 25.0 C / 298.1 K  
Operator: maw  
File:  
INOVA-400 "nrm1sun3"

Relax. delay 1.000 sec  
Pulse 45.0 degrees  
Acq. time 2.730 sec  
Width 6000.6 Hz  
16 repetitions  
OBSERVE H1, 400.1083661 MHz  
DATA PROCESSING  
Line broadening 0.3 Hz  
FT size 65536  
Total time 0 min, 59 sec

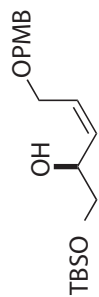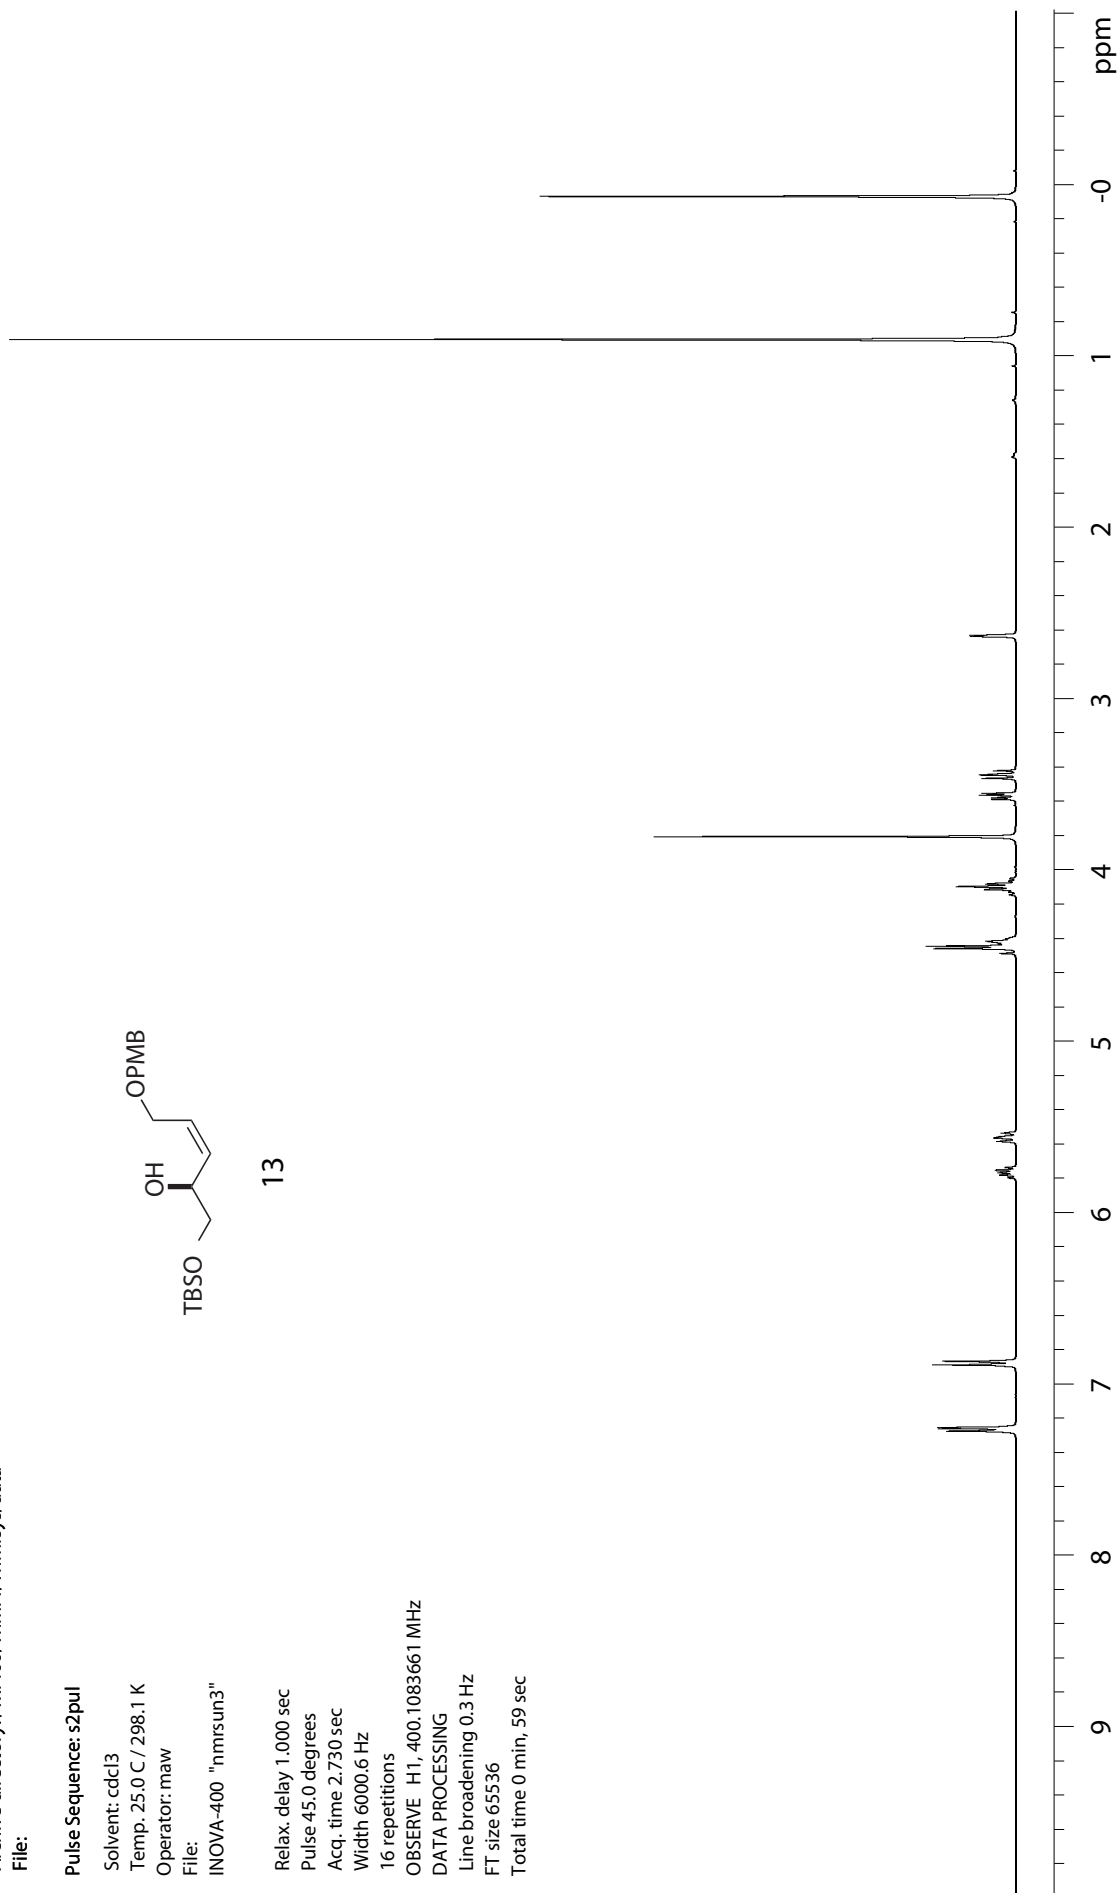



5-251-1H

Archive directory: /vxr400/vnmr1/vnmrsys/data  
File:

Pulse Sequence: s2pul

Solvent: cdc13  
Temp. 25.0 C / 298.1 K  
Operator: maw  
File:  
INOVA-400 "nrmr3"

Relax. delay 1.000 sec  
Pulse 45.0 degrees  
Acq. time 2.730 sec  
Width 6000.6 Hz  
16 repetitions  
OBSERVE H1, 400.1083682 MHz  
DATA PROCESSING  
Line broadening 0.3 Hz  
FT size 65536  
Total time 0 min, 59 sec

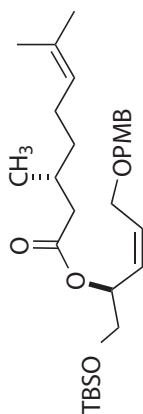

15

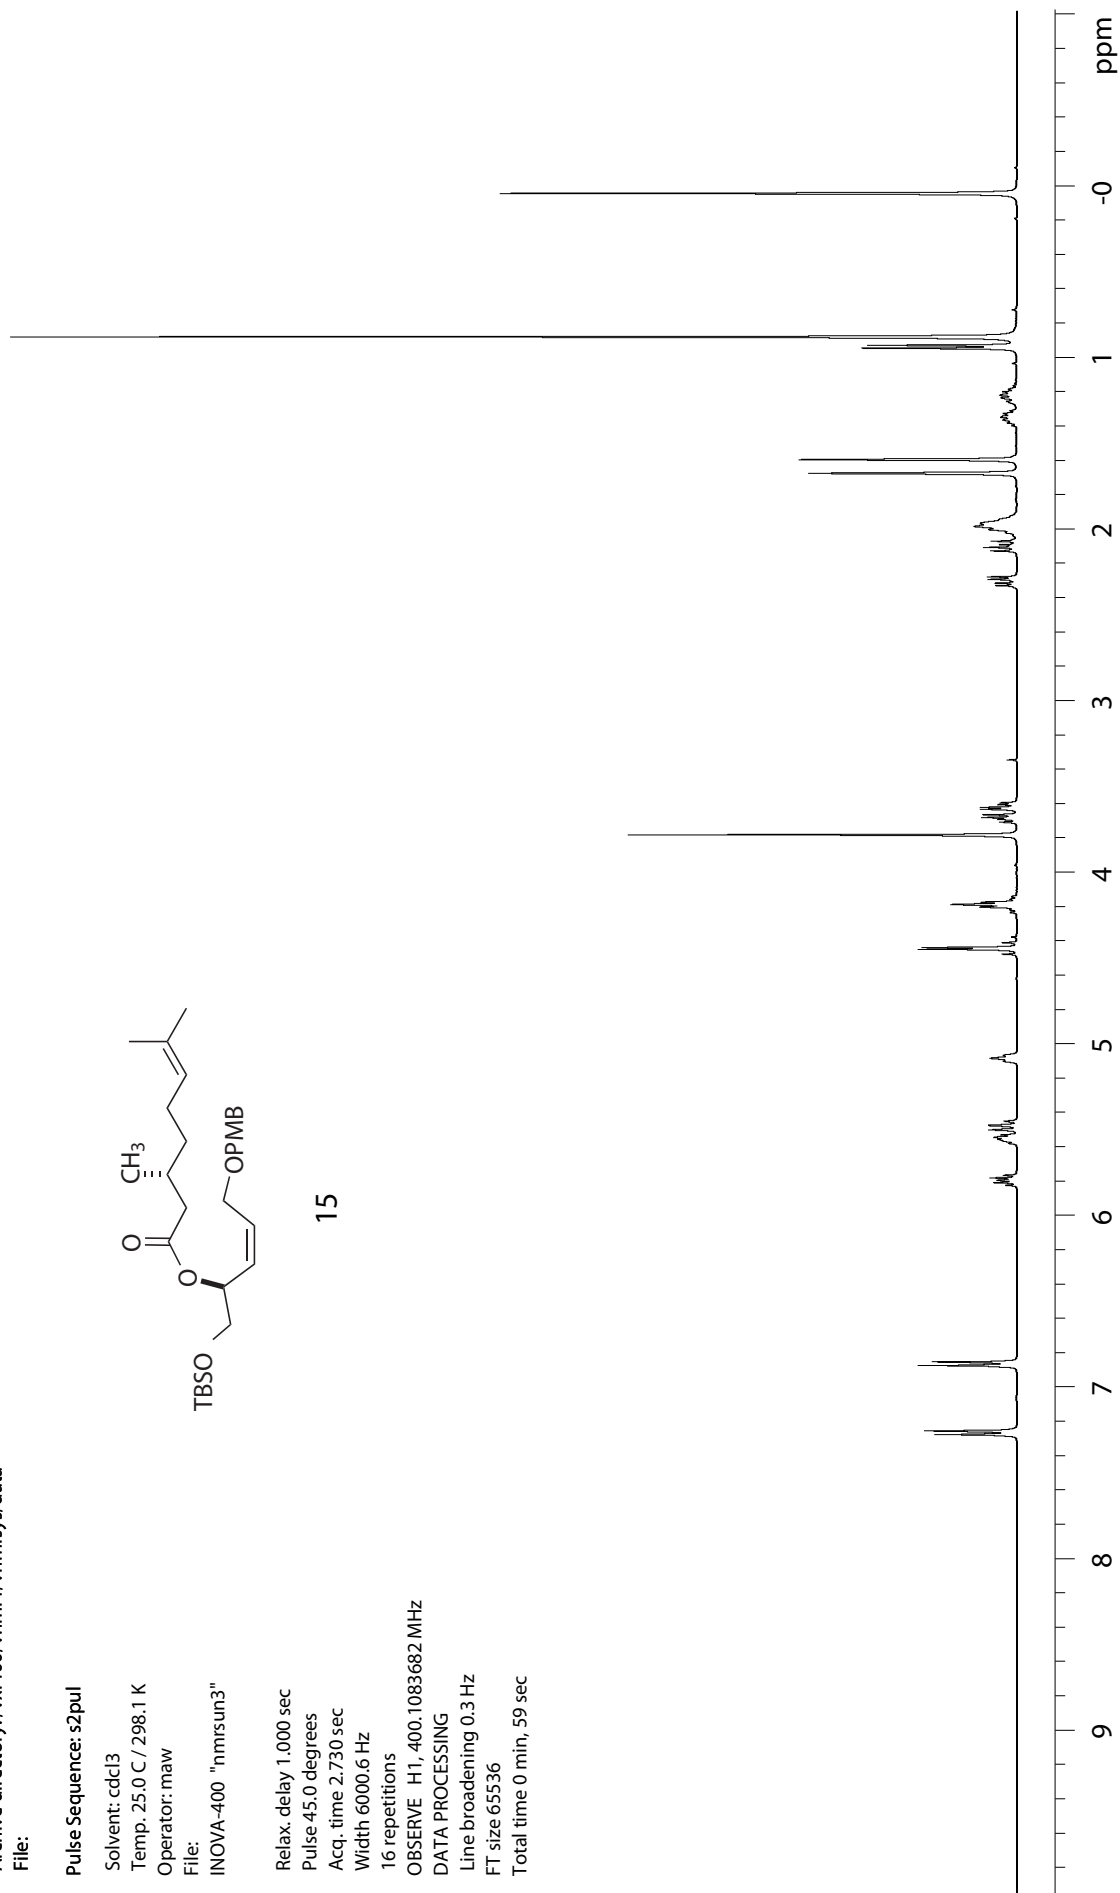

5-251-13C

Archive directory: /i400/dob/vnmrSYS/data  
File:

Pulse Sequence: s2pul

Solvent: CDCl3

Temp. 25.0 C / 298.1 K

Operator: maw

File:

INOVA-400 "nmrSun3"

15

Relax. delay 1.500 sec

Pulse 29.7 degrees

Acq. time 0.651 sec

Width 25157.2 Hz

87 repetitions

OBSERVE C13, 100.6073373 MHz

DECOUPLE H1, 400.1103789 MHz

Power 43 dB

continuously on

WALTZ-16 modulated

DATA PROCESSING

Line broadening 2.0 Hz

FT size 65536

Total time 9 min, 12 sec

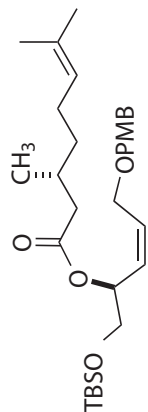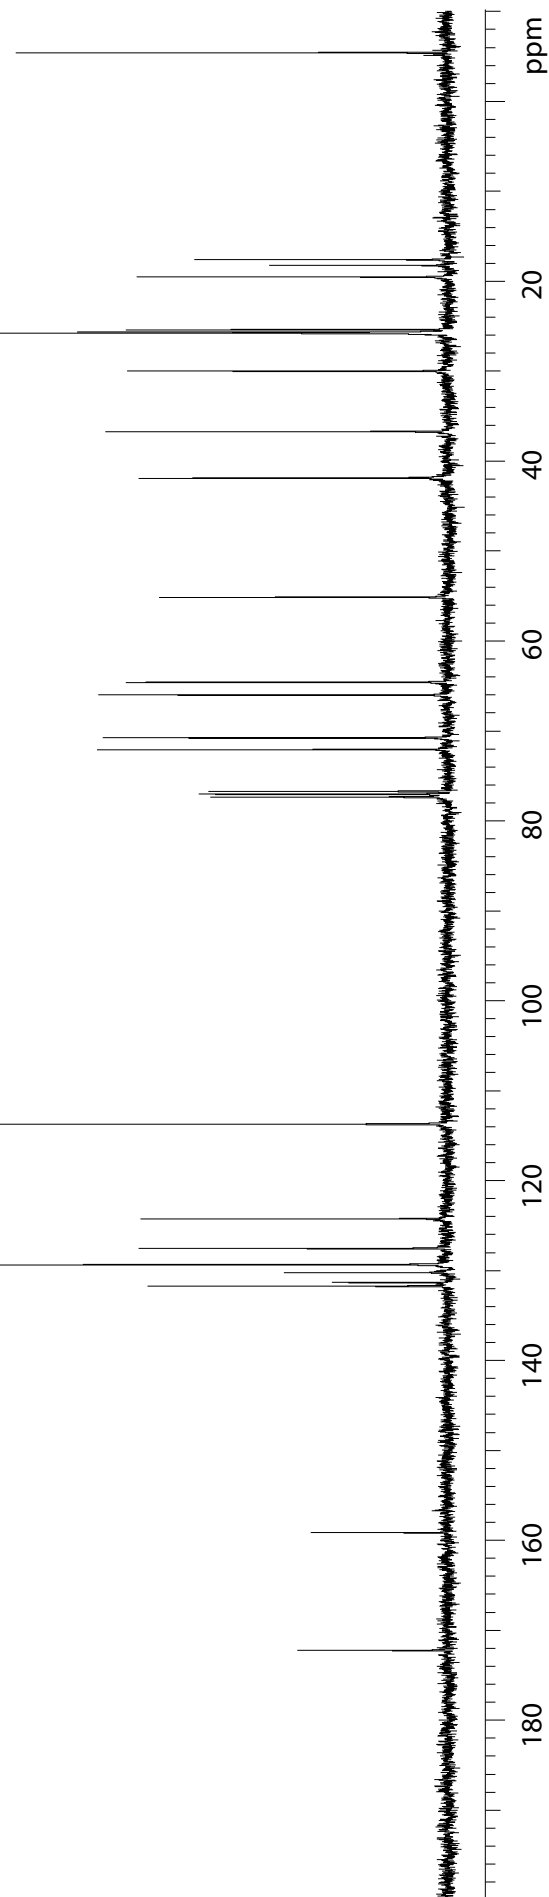

4-295-1H

Archive directory: /vxr400/vnmr1/vnmr1sys/data  
File:

Pulse Sequence: s2pul

Solvent: cdcl3

Temp. 25.0 C / 298.1 K

Operator: maw

File:

INOVA-400 "nrmisun3"

Relax. delay 1.000 sec

Pulse 45.0 degrees

Acq. time 2.730 sec

Width 6000.6 Hz

16 repetitions

OBSERVE H1, 400.1137399 MHz

DATA PROCESSING

Line broadening 0.3 Hz

FT size 65536

Total time 0 min, 59 sec

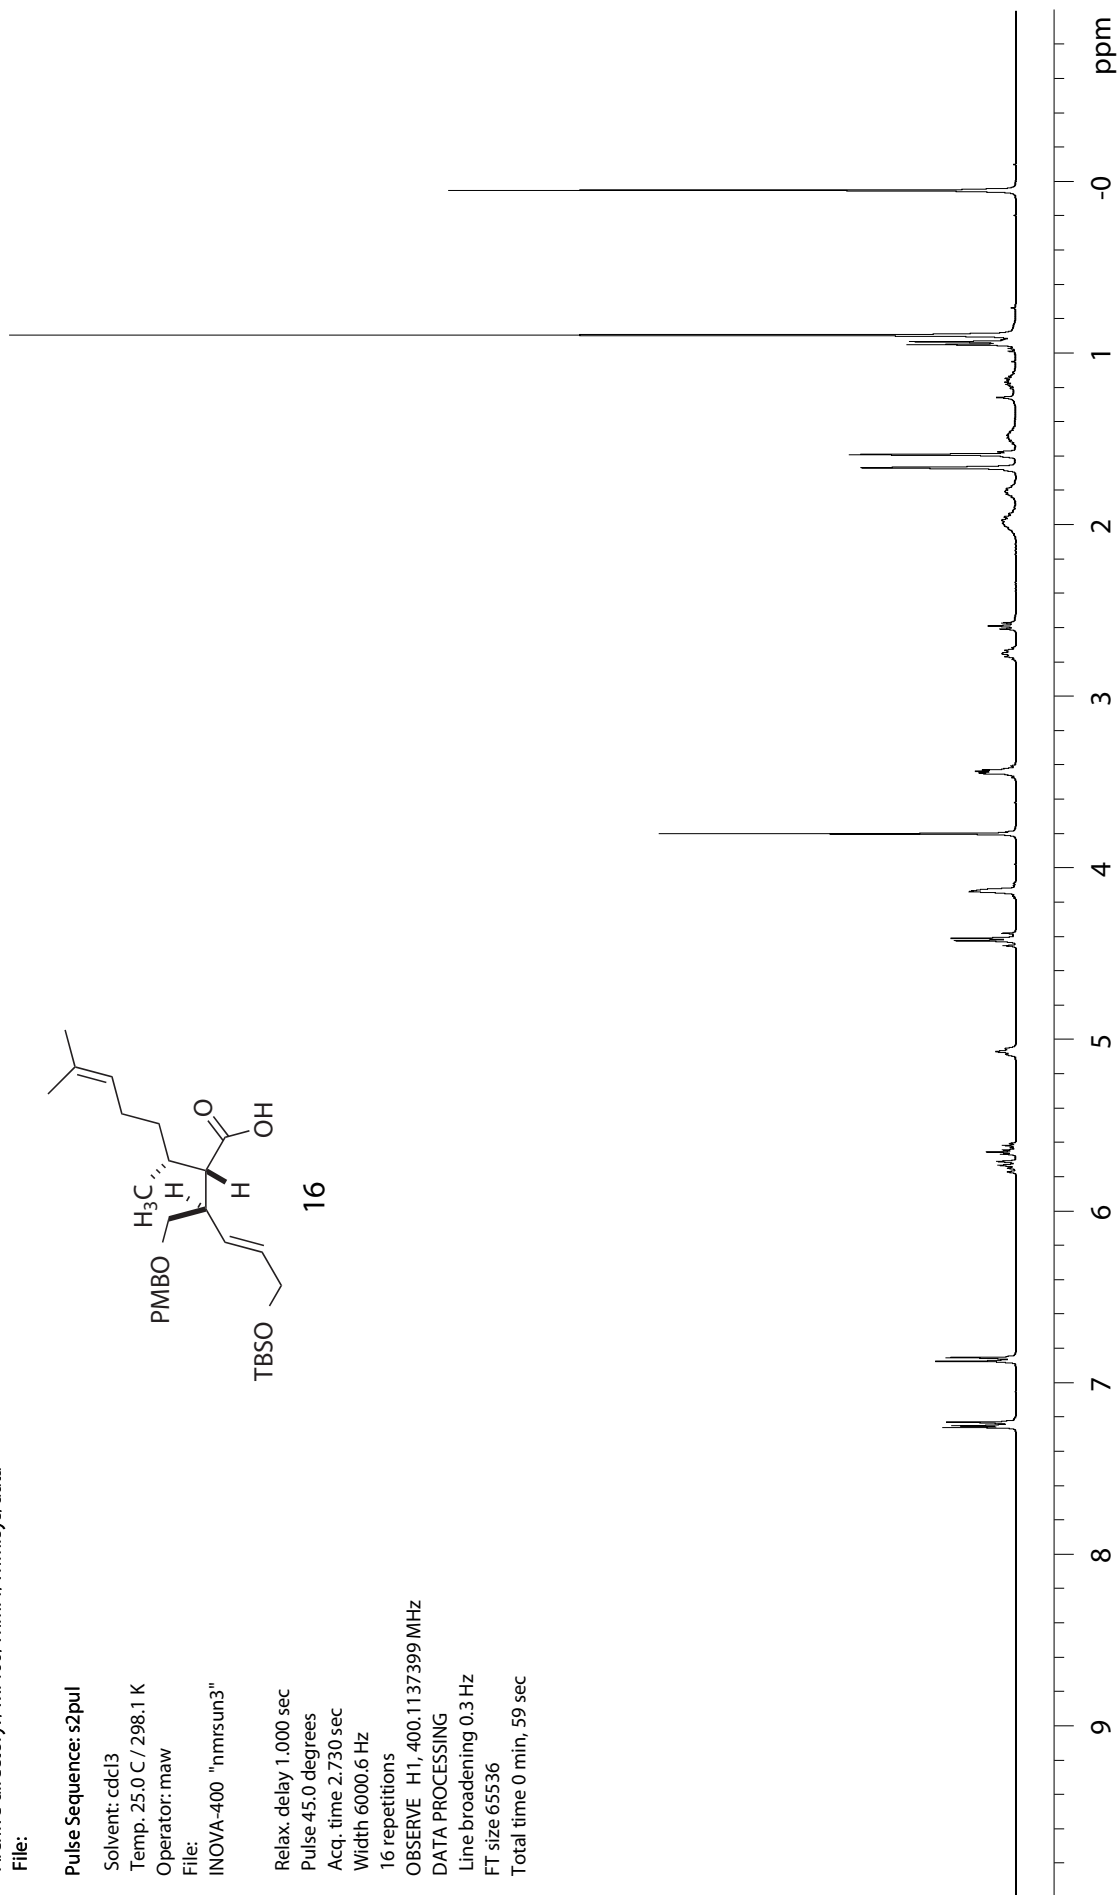

5-101-13C

Archive directory: /i400/dob/vnmrSYS/data  
File:

Pulse Sequence: s2pul

Solvent: CDCl<sub>3</sub>

Temp. 25.0 C / 298.1 K

Operator: maw

File:

INOVA-400 "nrmrSun3"

Relax. delay 1.500 sec

Pulse 29.7 degrees

Acq. time 0.651 sec

Width 25157.2 Hz

2560 repetitions

OBSERVE C13, 100.6073297 MHz

DECOUPLE H1, 400.1103789 MHz

Power 43 dB

continuously on

WALTZ-16 modulated

DATA PROCESSING

Line broadening 2.0 Hz

FT size 65536

Total time 1 hr, 32 min, 9 sec

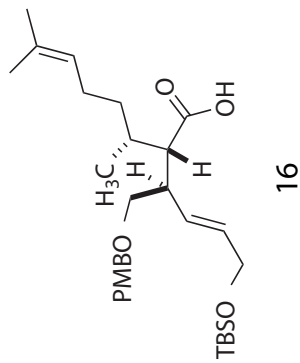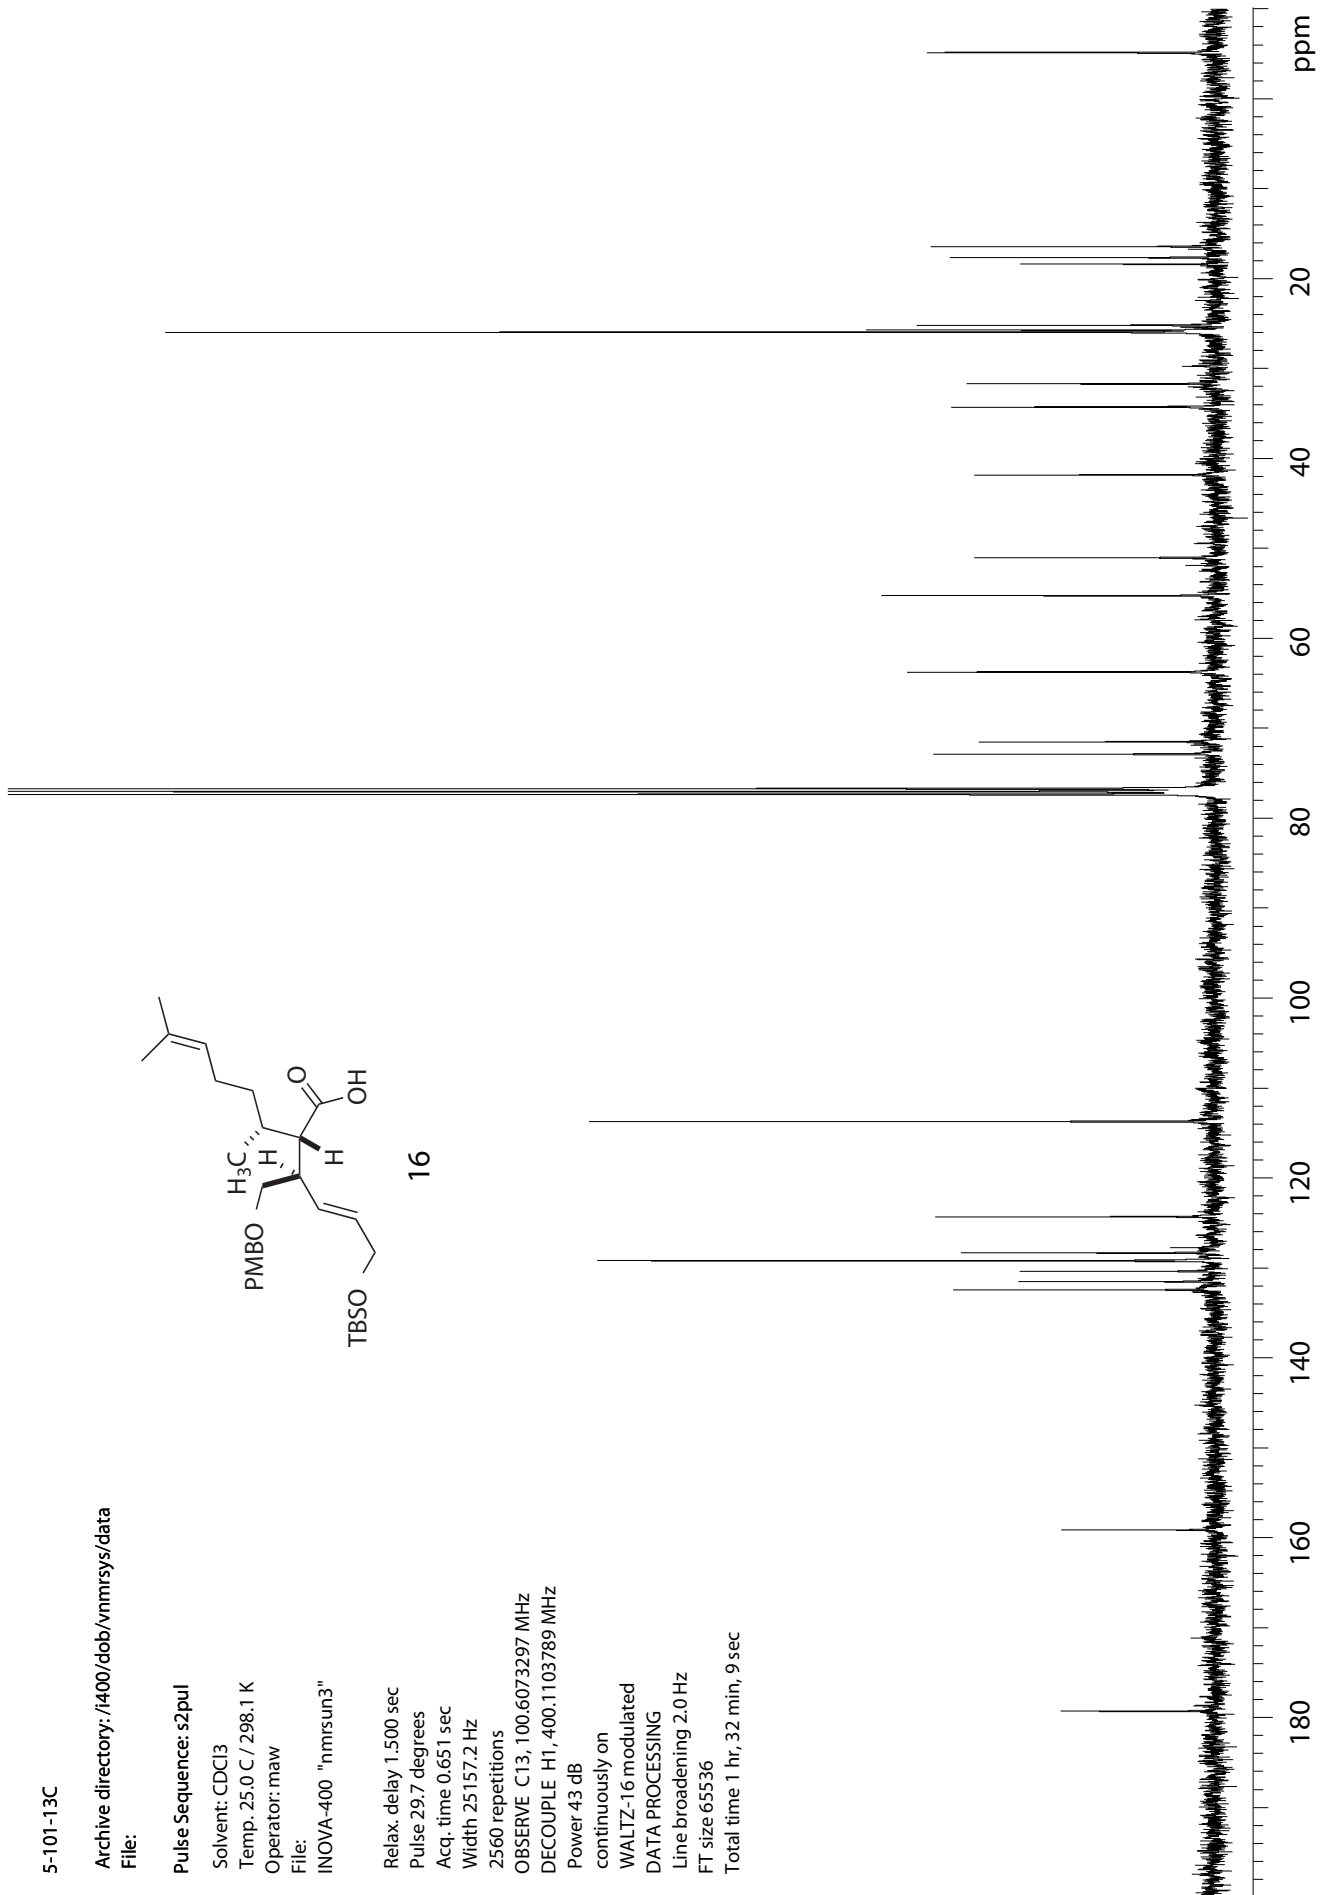

2-173-1H

Pulse Sequence: s2pul

Solvent: cdcl3

Temp. 25.0 C / 298.1 K

File:

INOVA-400 "nmrsum3"

Relax. delay 1.000 sec

Pulse 45.0 degrees

Acq. time 1.998 sec

Width 4500.5 Hz

16 repetitions

OBSERVE H1, 300.0574170 MHz

DATA PROCESSING

Line broadening 0.5 Hz

FT size 65536

Total time 0 min, 48 sec

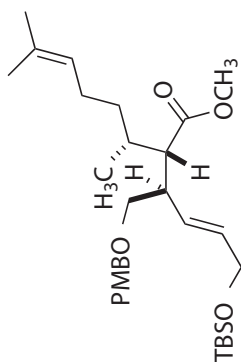

S4

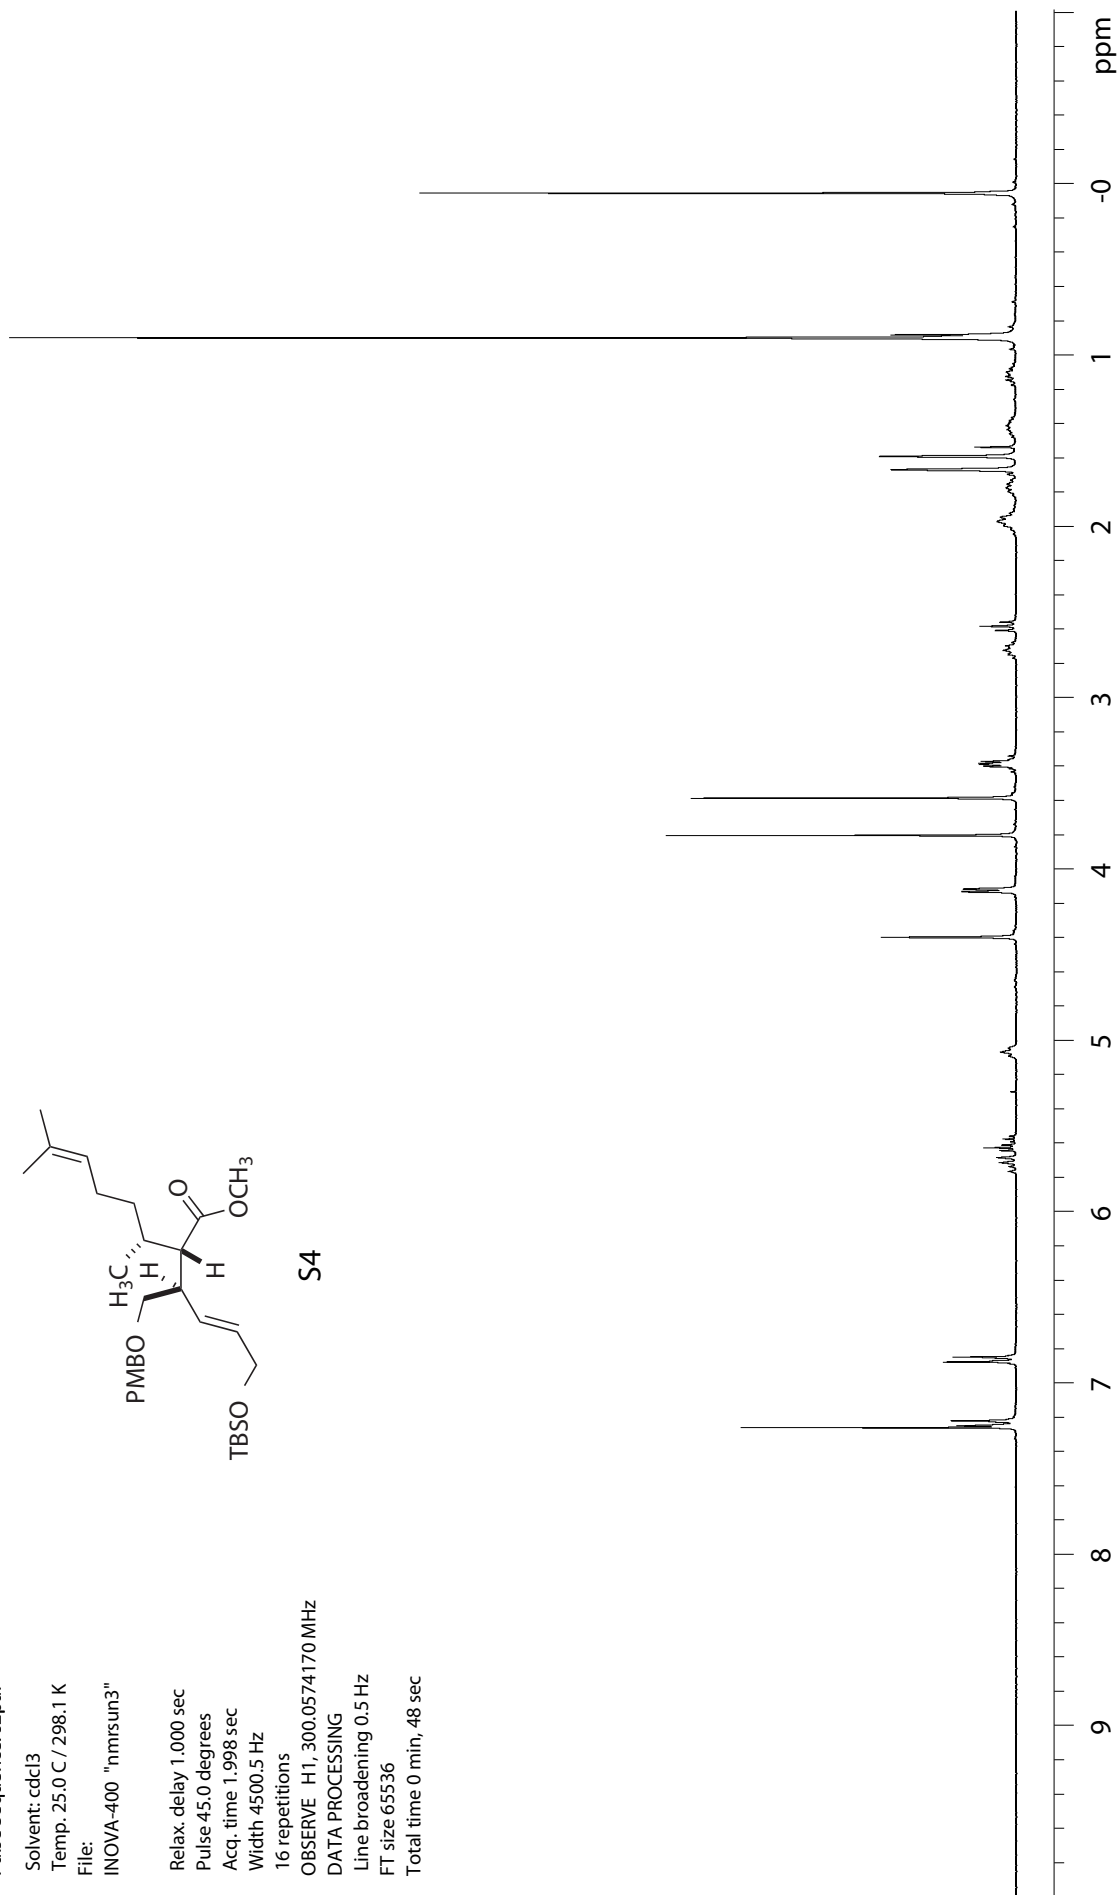



6-16-13C

Archive directory: /i400/dob/vnmrSYS/data  
File:

Pulse Sequence: s2pul

Solvent: cdc13

Temp. 25.0 C / 298.1 K

Operator: maw

File:

INOVA-400 "nrmrSun3"

Relax. delay 1.500 sec

Pulse 29.7 degrees

Acq. time 0.651 sec

Width 25157.2 Hz

159 repetitions

OBSERVE C13, 100.6073312 MHz

DECOUPLE H1, 400.1103789 MHz

Power 43 dB

continuously on

WALTZ-16 modulated

DATA PROCESSING

Line broadening 2.0 Hz

FT size 65536

Total time 9 min, 12 sec

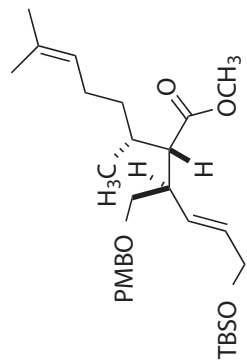

S4

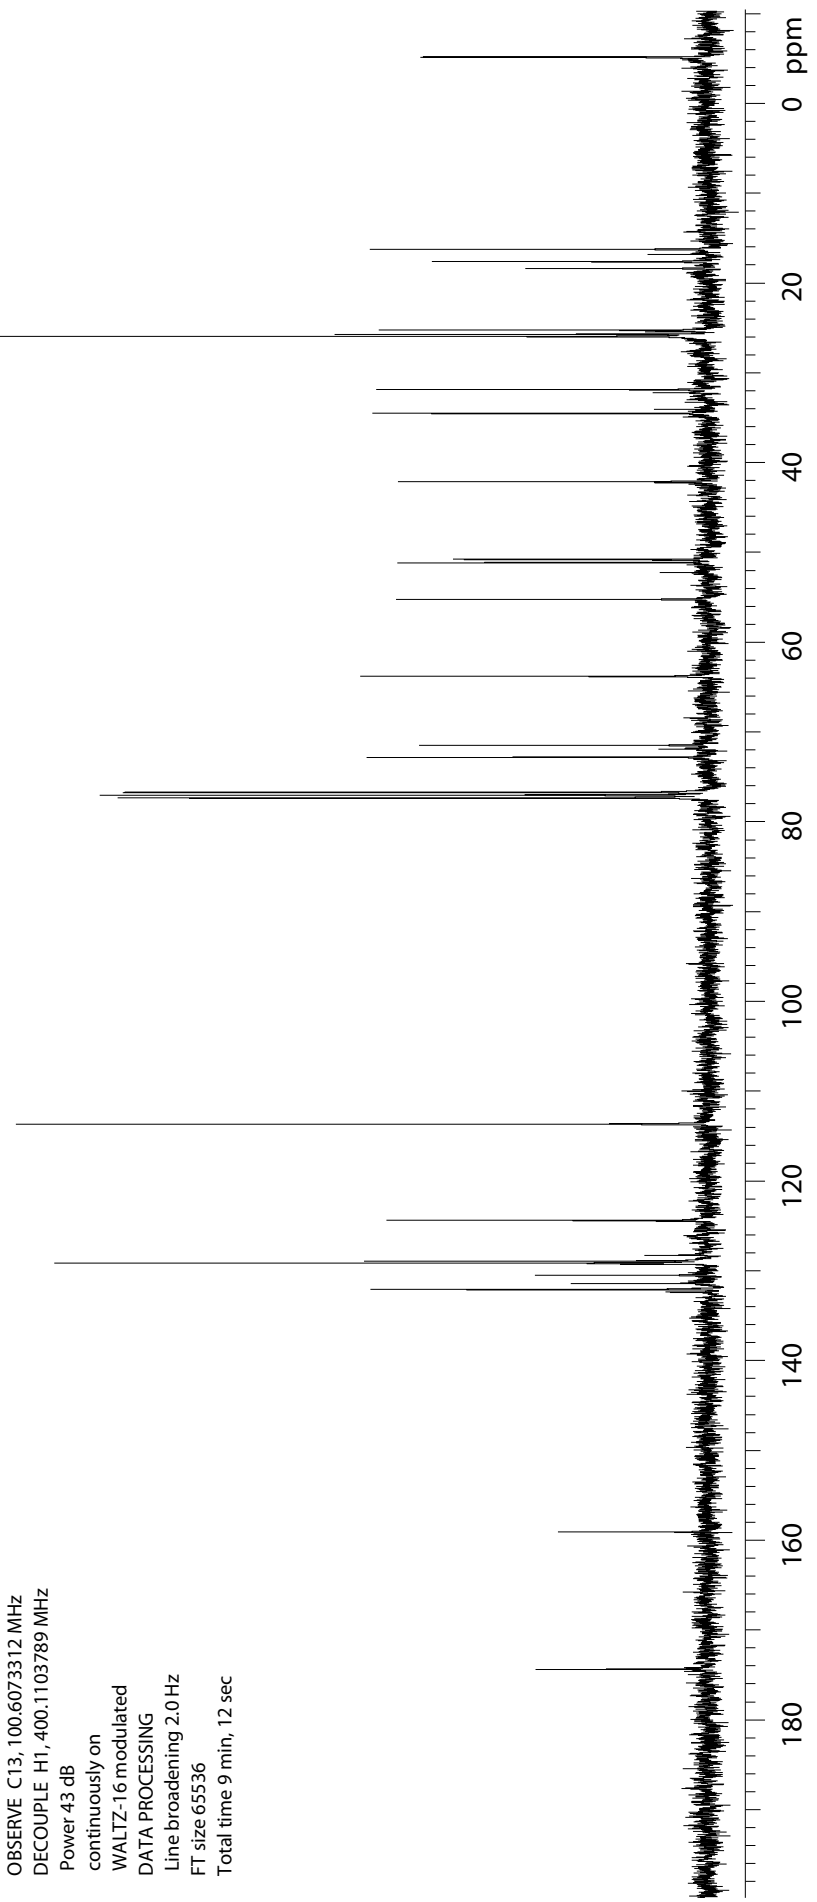

2-231-1H

Archive directory: /i400/dob/vnmrSYS/data  
File:

Pulse Sequence: s2pul

Solvent: cdcl3

Temp. 25.0 C / 298.1 K

User: 1-12-87

File:

INOVA-400 "nrmrSun3"

Relax. delay 1.000 sec

Pulse 45.0 degrees

Acq. time 2.003 sec

Width 6402.0 Hz

16 repetitions

OBSERVE H1, 400.1180423 MHz

DATA PROCESSING

Line broadening 0.5 Hz

FT size 65536

Total time 0 min, 48 sec

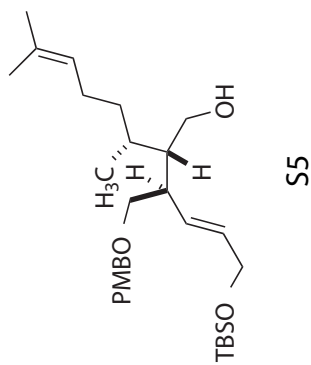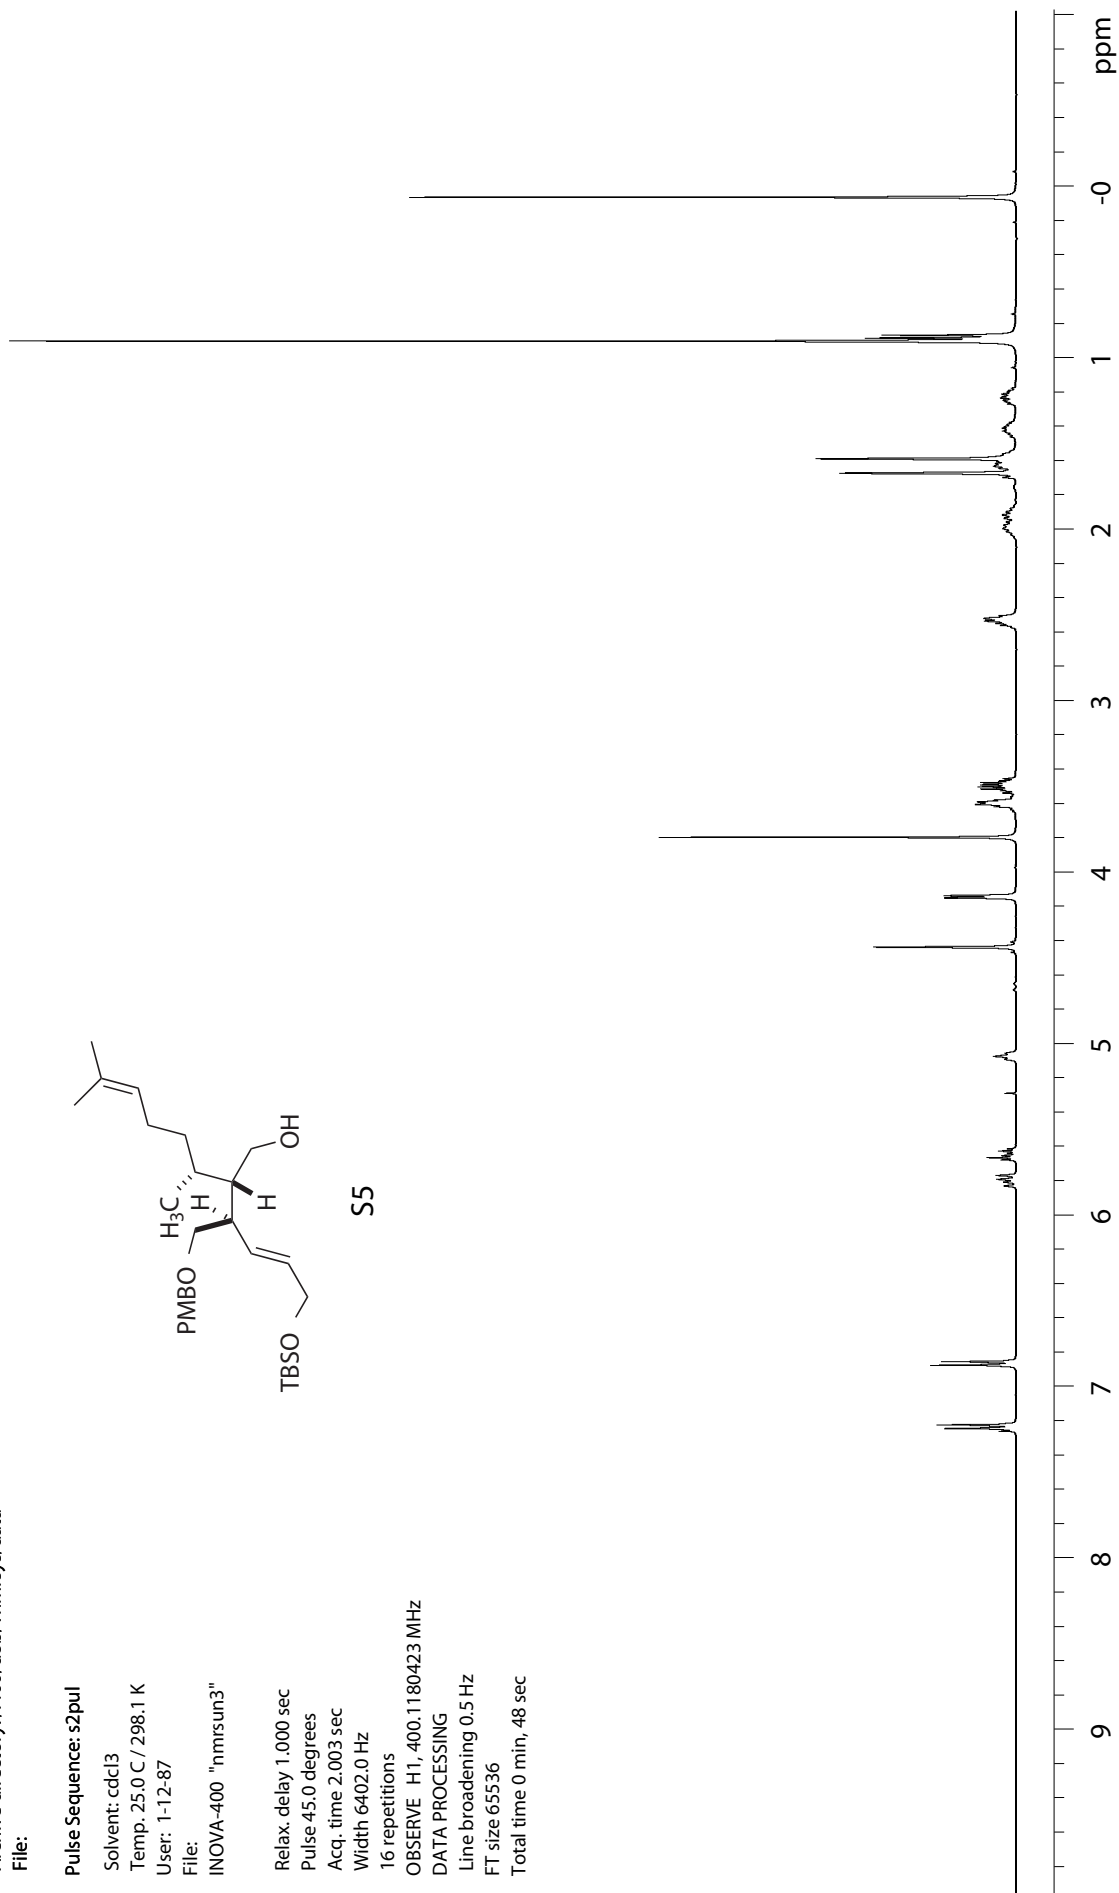

2-187-13C

Archive directory: /i400/dob/vnmrSYS/data  
File:

Pulse Sequence: s2pul

Solvent: cdcl3

Temp. 25.0 C / 298.1 K

File:

INOVA-400 "nmsun3"

Relax. delay 1.500 sec

Pulse 29.8 degrees

Acq. time 0.651 sec

Width 25157.2 Hz

2624 repetitions

OBSERVE C13, 100.6097614 MHz

DECOUPLE H1, 400.1200527 MHz

Power 41 dB

continuously on

WALTZ-16 modulated

DATA PROCESSING

Line broadening 2.0 Hz

FT size 65536

Total time 6 hr, 1 sec

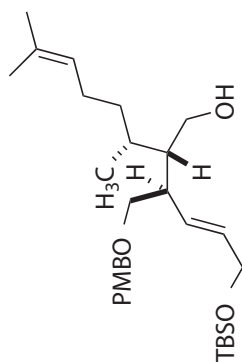

S5

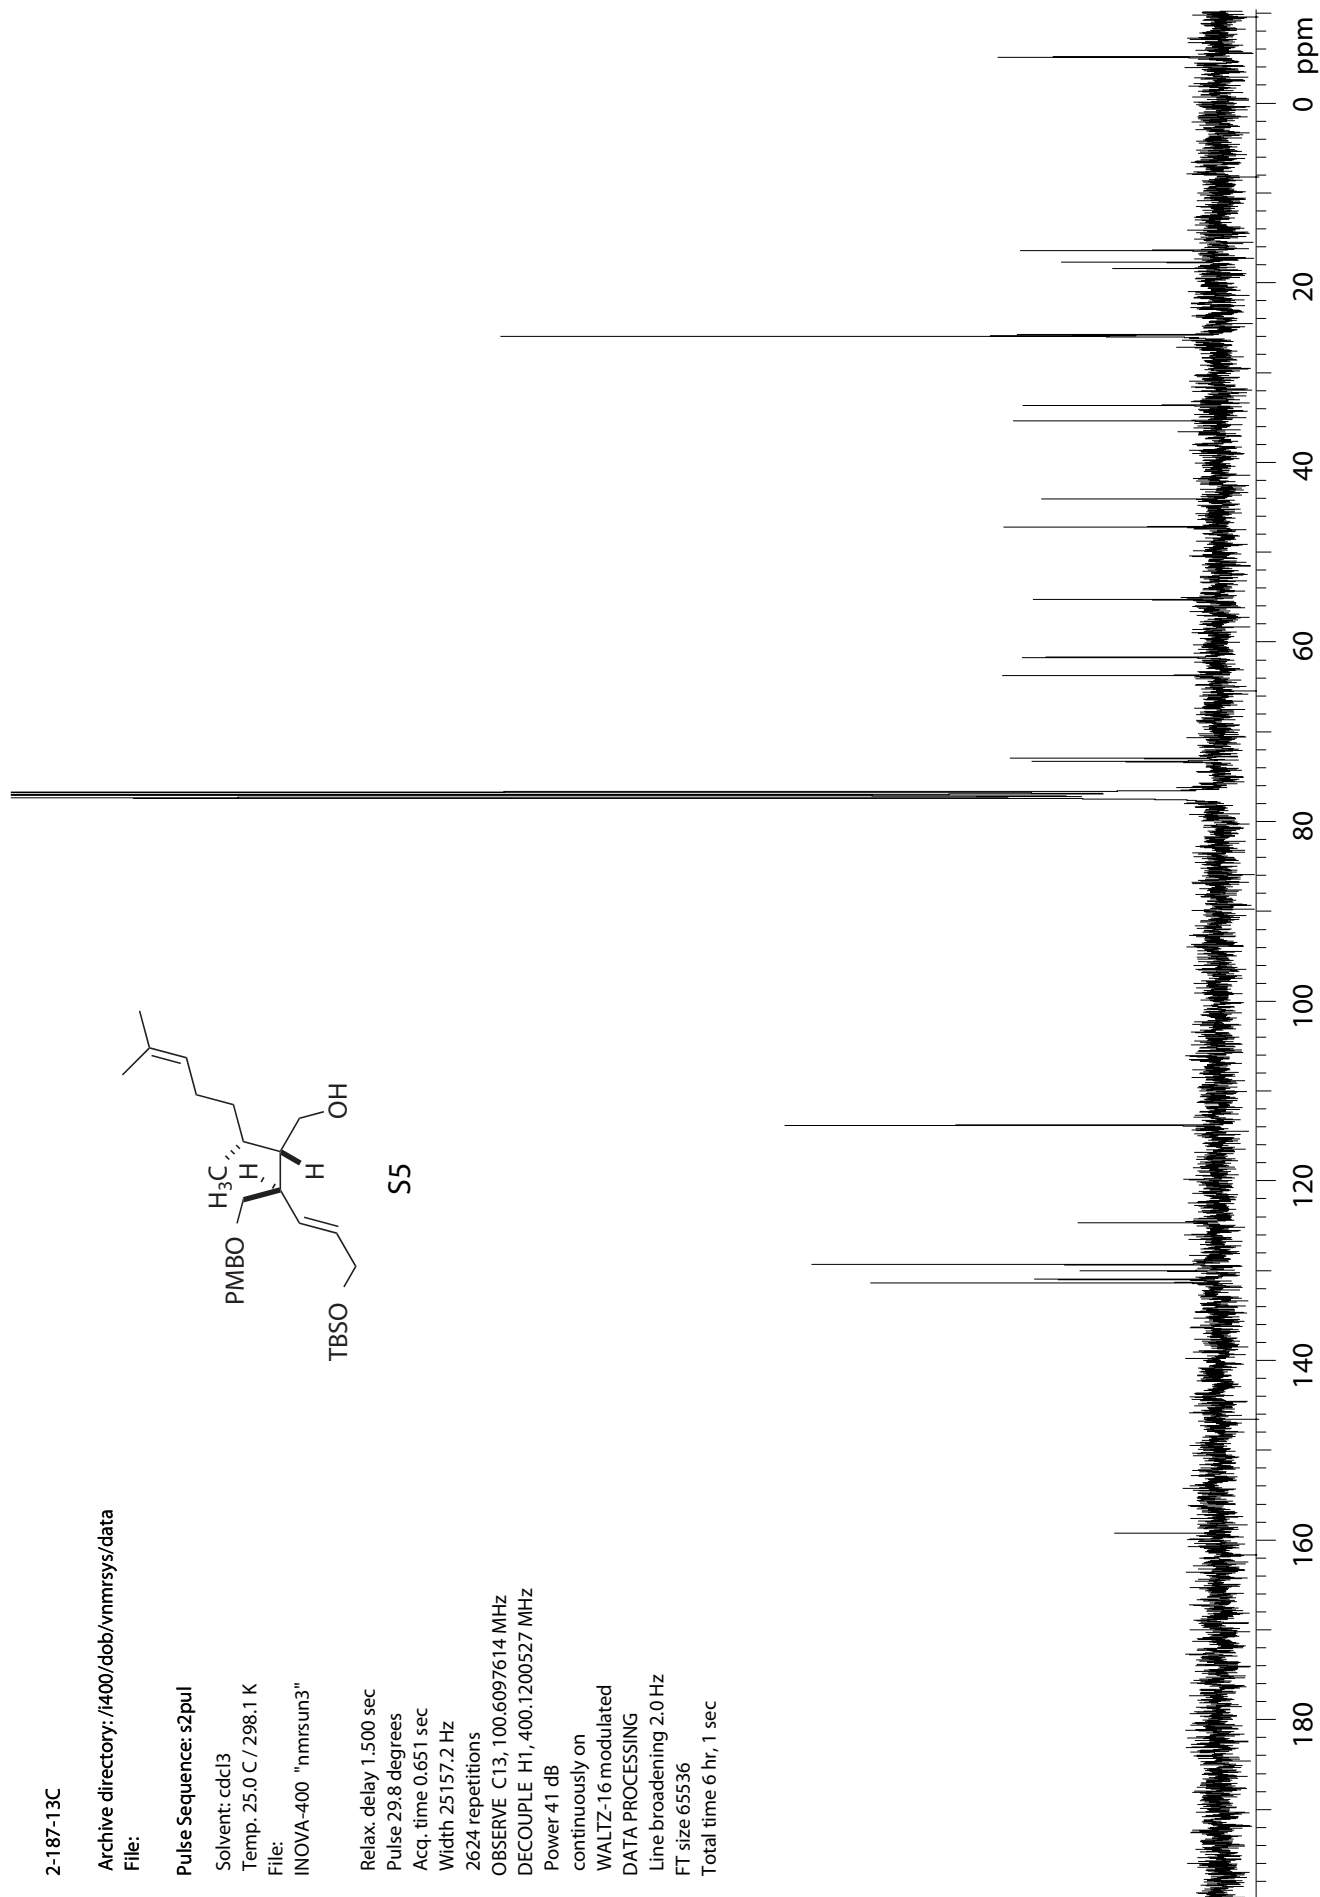

3-221-1H

Archive directory: /vxr400/dob/vnmr/ys/data  
File:

Pulse Sequence: s2pul

Solvent: cdcl3

Temp. 25.0 C / 298.1 K

File:

INOVA-400 "nmsun3"

Relax. delay 1.000 sec

Pulse 45.0 degrees

Acq. time 2.000 sec

Width 5999.7 Hz

16 repetitions

OBSERVE H1, 399.7206759 MHz

DATA PROCESSING

Line broadening 0.5 Hz

FT size 65536

Total time 0 min, 48 sec

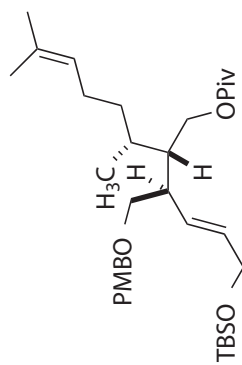

S6

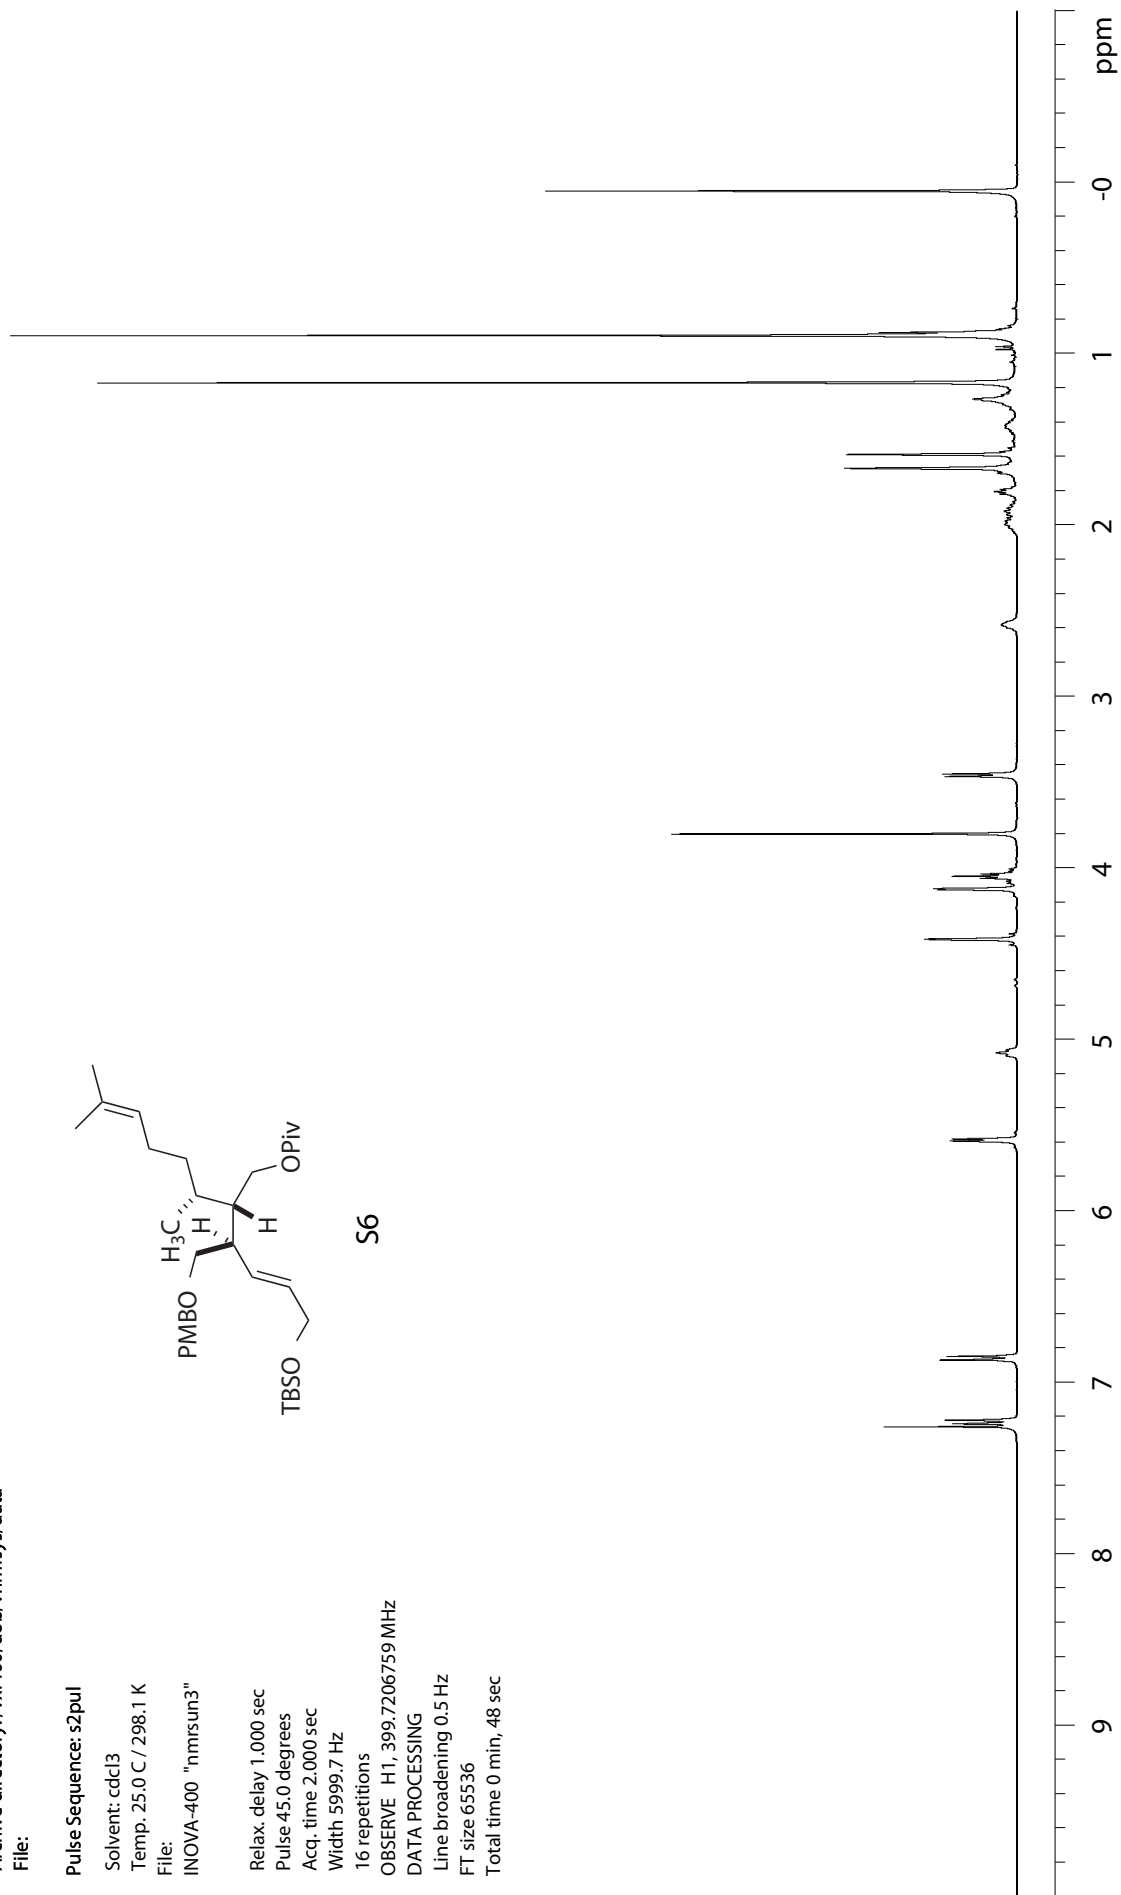

6-22-13C

Archive directory: /i400/dob/vnmrSYS/data  
 File: mjw6\_22\_13C\_p

Pulse Sequence: s2pul

Solvent: cdc13  
 Temp. 25.0 C / 298.1 K  
 Operator: maw  
 File: mjw6\_22\_13C\_p  
 INOVA-400 "nmsun3"

Relax. delay 1.500 sec  
 Pulse 29.7 degrees  
 Acq. time 0.651 sec  
 Width 25157.2 Hz  
 75 repetitions  
 OBSERVE C13, 100.6073320 MHz  
 DECOUPLE H1, 400.1103789 MHz  
 Power 43 dB  
 continuously on  
 WALTZ-16 modulated  
 DATA PROCESSING  
 Line broadening 2.0 Hz  
 FT size 65536  
 Total time 9 min, 12 sec

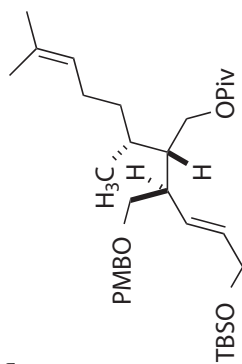

S6

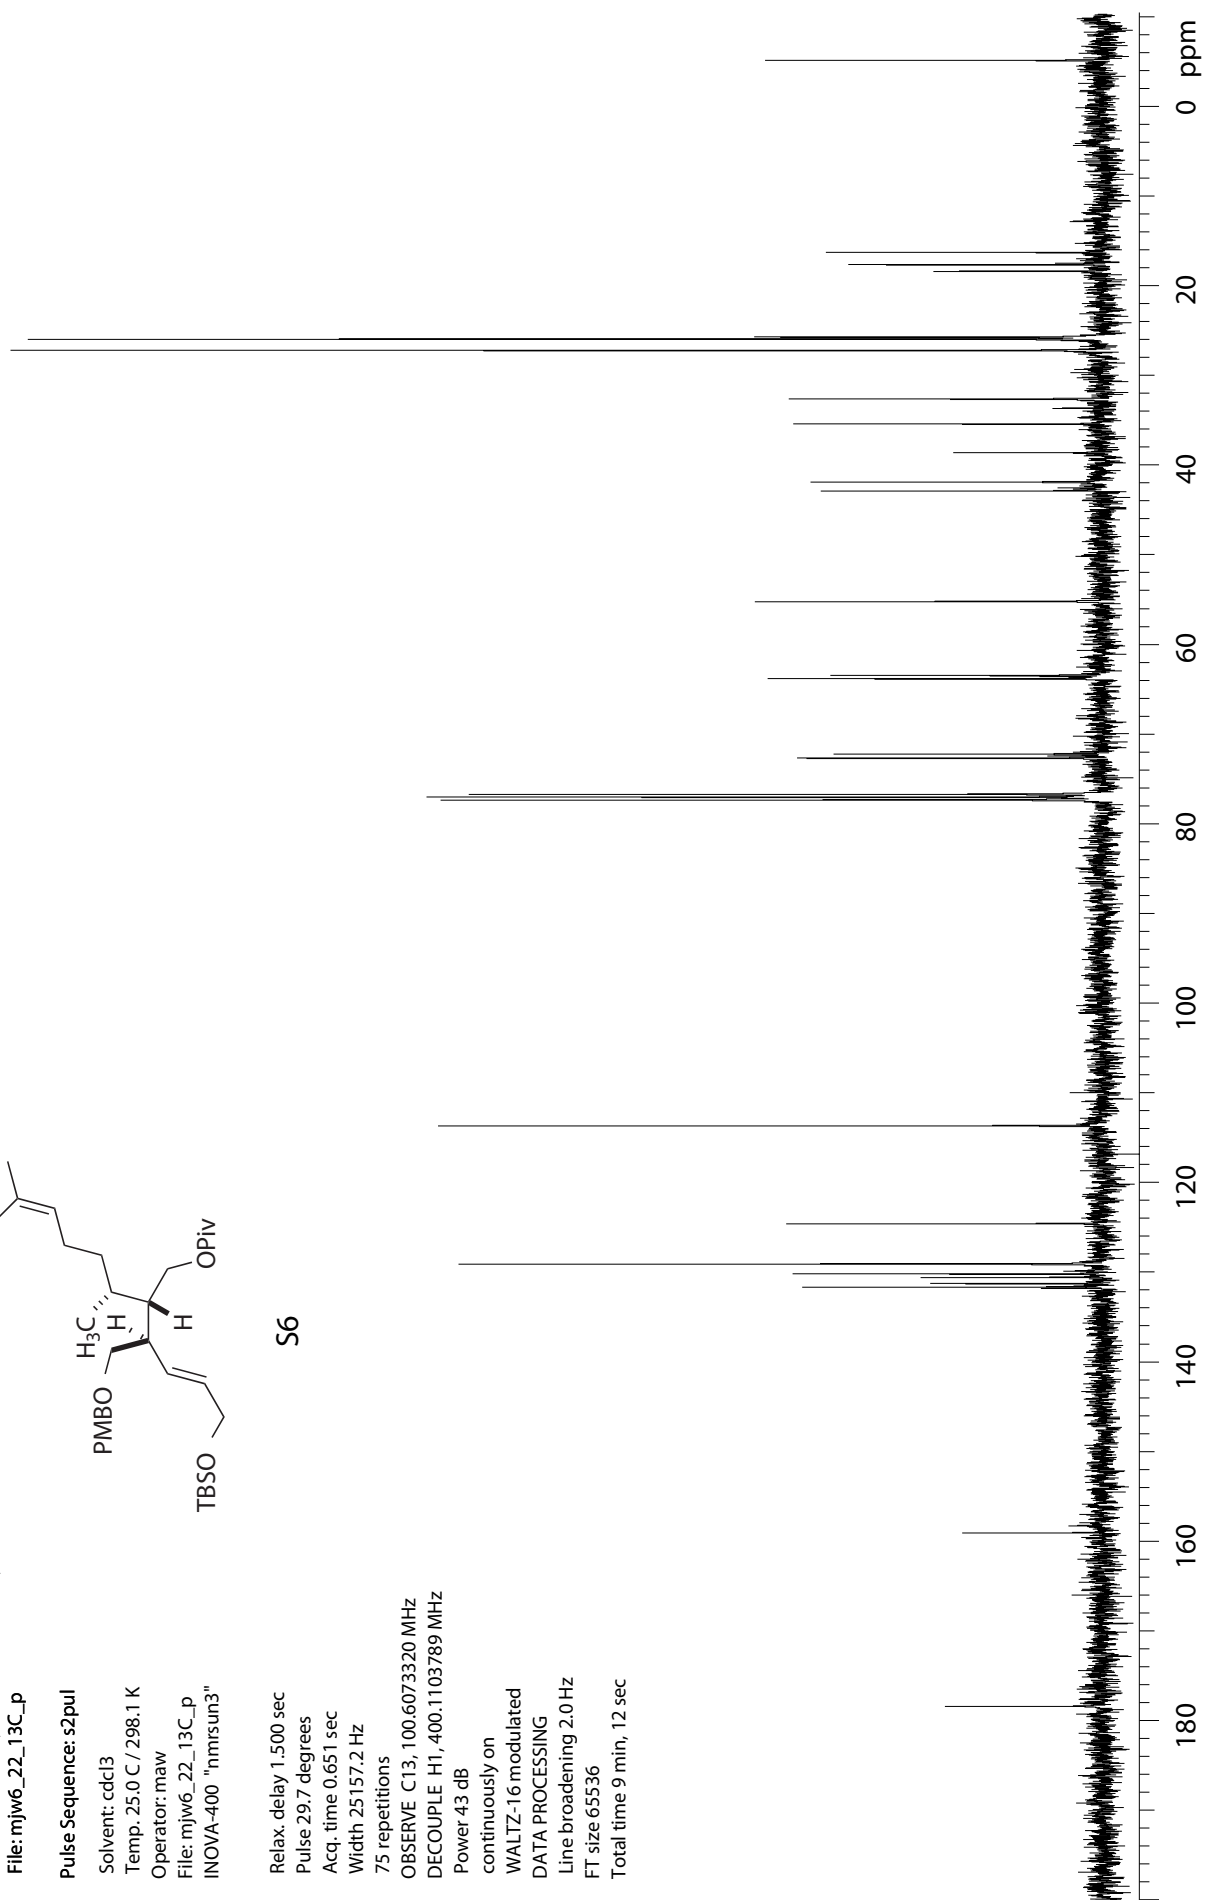

3-251-1H

Archive directory: /i400/dob/vnmrSYS/data  
File:

Pulse Sequence: s2pul

Solvent: cdcl3

Temp. 25.0 C / 298.1 K

User: 1-12-87

File:

INOVA-400 "nrmrSun3"

Relax. delay 1.000 sec

Pulse 45.0 degrees

Acq. time 2.003 sec

Width 6402.0 Hz

16 repetitions

OBSERVE H1, 400.1137398 MHz

DATA PROCESSING

Line broadening 0.5 Hz

FT size 65536

Total time 0 min, 48 sec

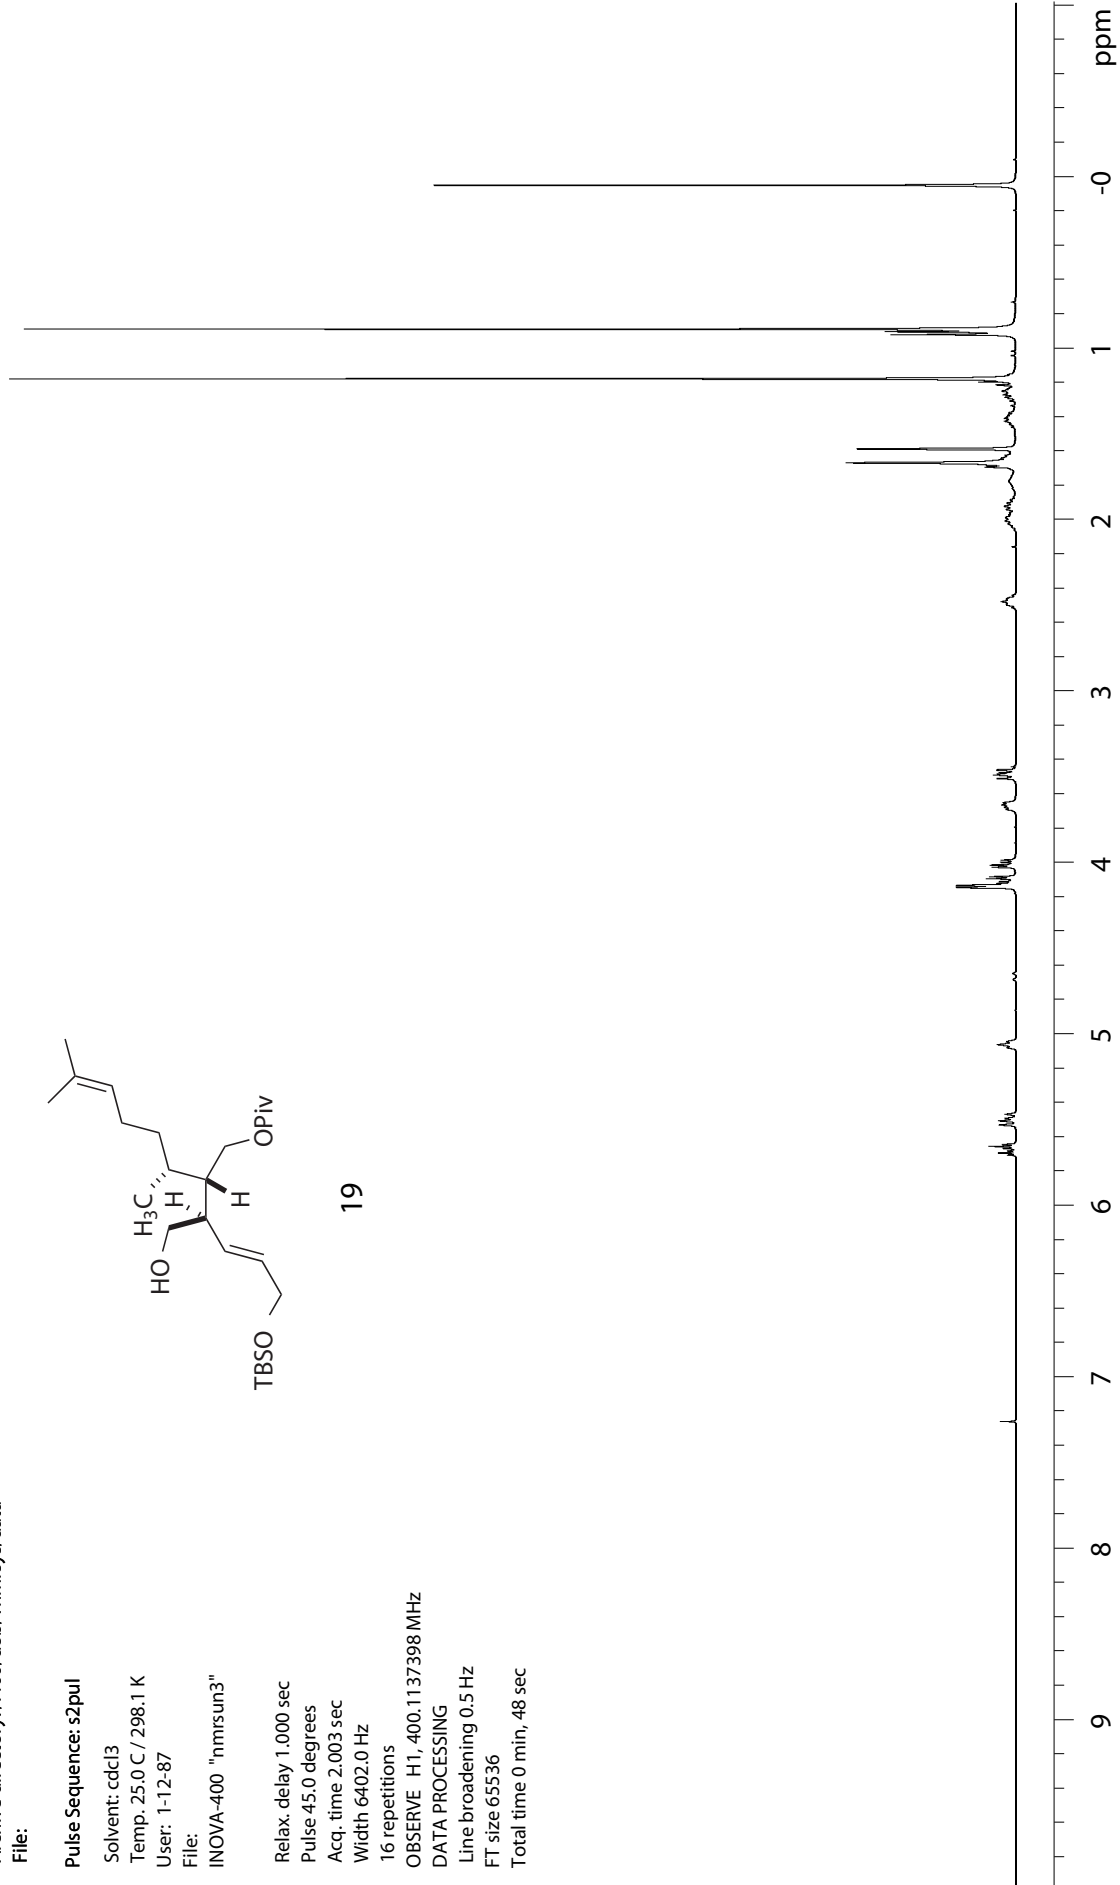

3-250-13C

Archive directory: /i400/dob/vnmrSYS/data  
File:

Pulse Sequence: s2pul

Solvent: cdc13

Temp. 25.0 C / 298.1 K

File:

INOVA-400 "nmsun3"

Relax. delay 1.500 sec

Pulse 29.7 degrees

Acq. time 0.651 sec

Width 25157.2 Hz

1209 repetitions

OBSERVE C13, 100.6086810 MHz

DECOUPLE H1, 400.1157467 MHz

Power 42 dB

continuously on

WALTZ-16 modulated

DATA PROCESSING

Line broadening 2.0 Hz

FT size 65536

Total time 55 min, 17 sec

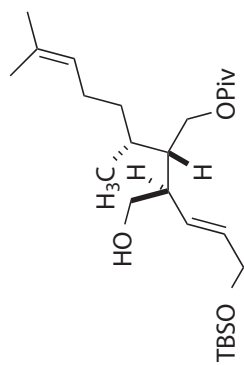

19

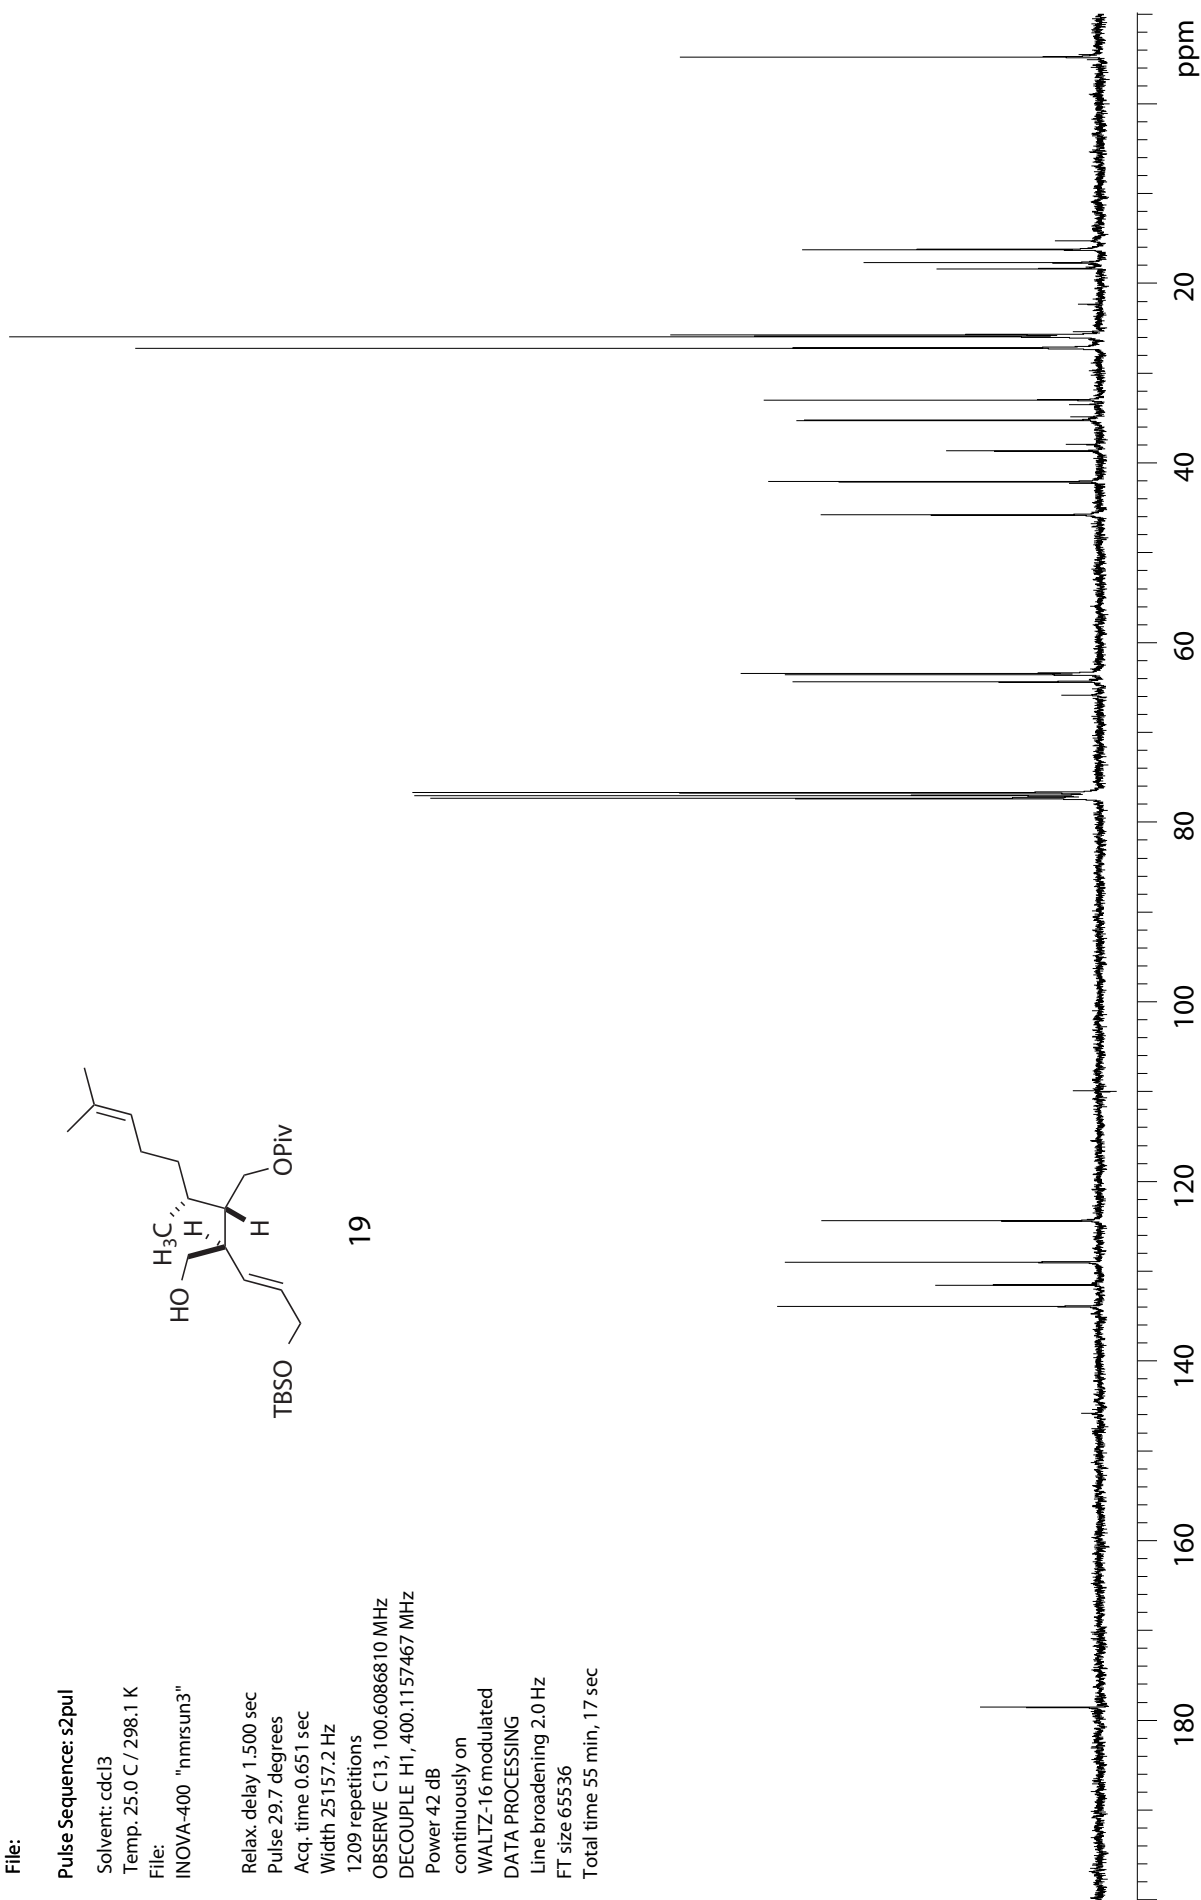

3-252-1H

Archive directory: /i400/dob/vnmrsys/data  
File:

Pulse Sequence: s2pul

Solvent: cdcl3

Temp. 25.0 C / 298.1 K

User: 1-12-87

File:

INOVA-400 "nrmr3"

Relax. delay 1.000 sec

Pulse 45.0 degrees

Acq. time 2.003 sec

Width 6402.0 Hz

16 repetitions

OBSERVE H1, 400.1137398 MHz

DATA PROCESSING

Line broadening 0.5 Hz

FT size 65536

Total time 0 min, 48 sec

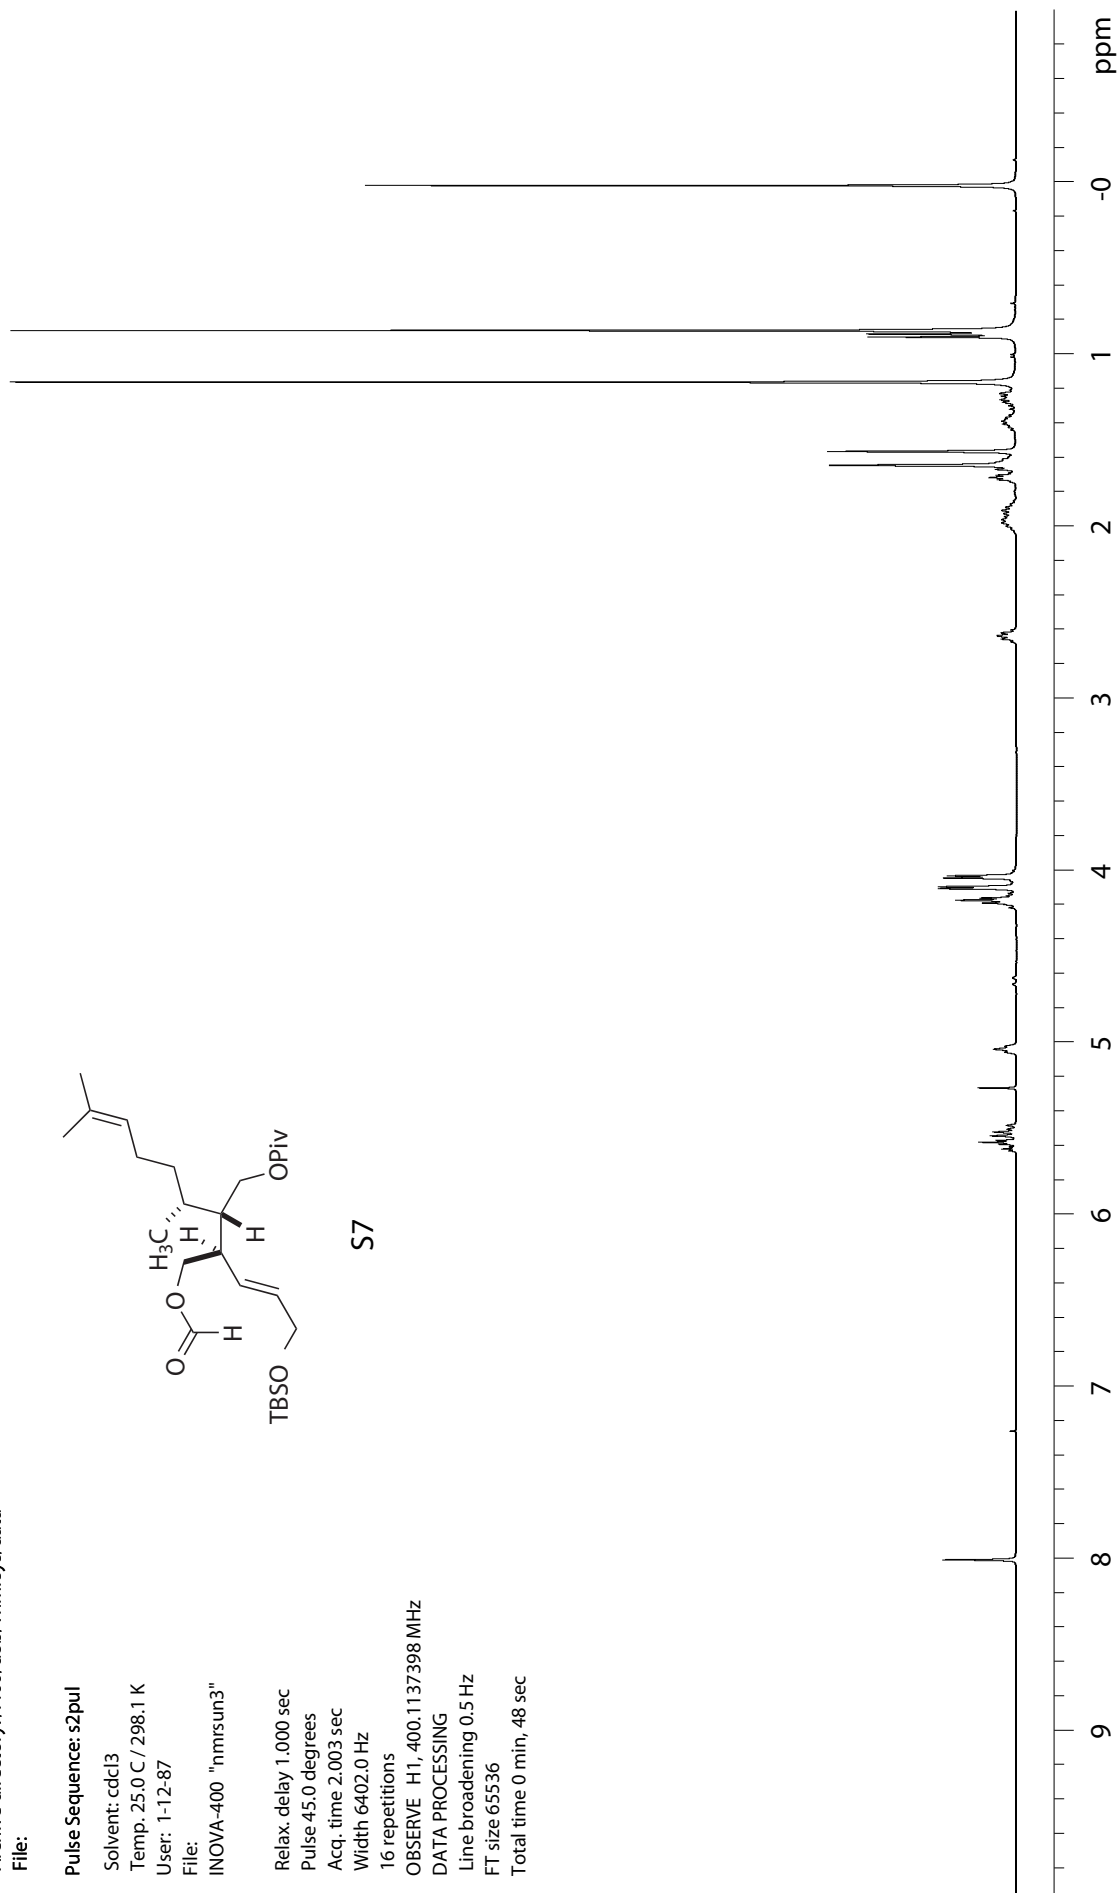



3-252-13C

Archive directory: /i400/dob/vnmrsys/data  
File:

Pulse Sequence: s2pul

Solvent: cdc13

Temp. 25.0 C / 298.1 K

File:

INOVA-400 "nmsun3"

Relax. delay 1.500 sec

Pulse 29.7 degrees

Acq. time 0.651 sec

Width 25157.2 Hz

87 repetitions

OBSERVE C13, 100.6086841 MHz

DECOUPLE H1, 400.1157467 MHz

Power 42 dB

continuously on

WALTZ-16 modulated

DATA PROCESSING

Line broadening 2.0 Hz

FT size 65536

Total time 18 min, 25 sec

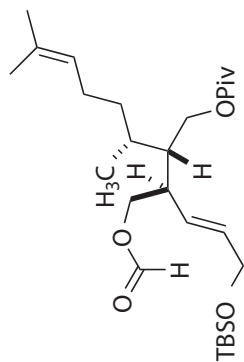

S7

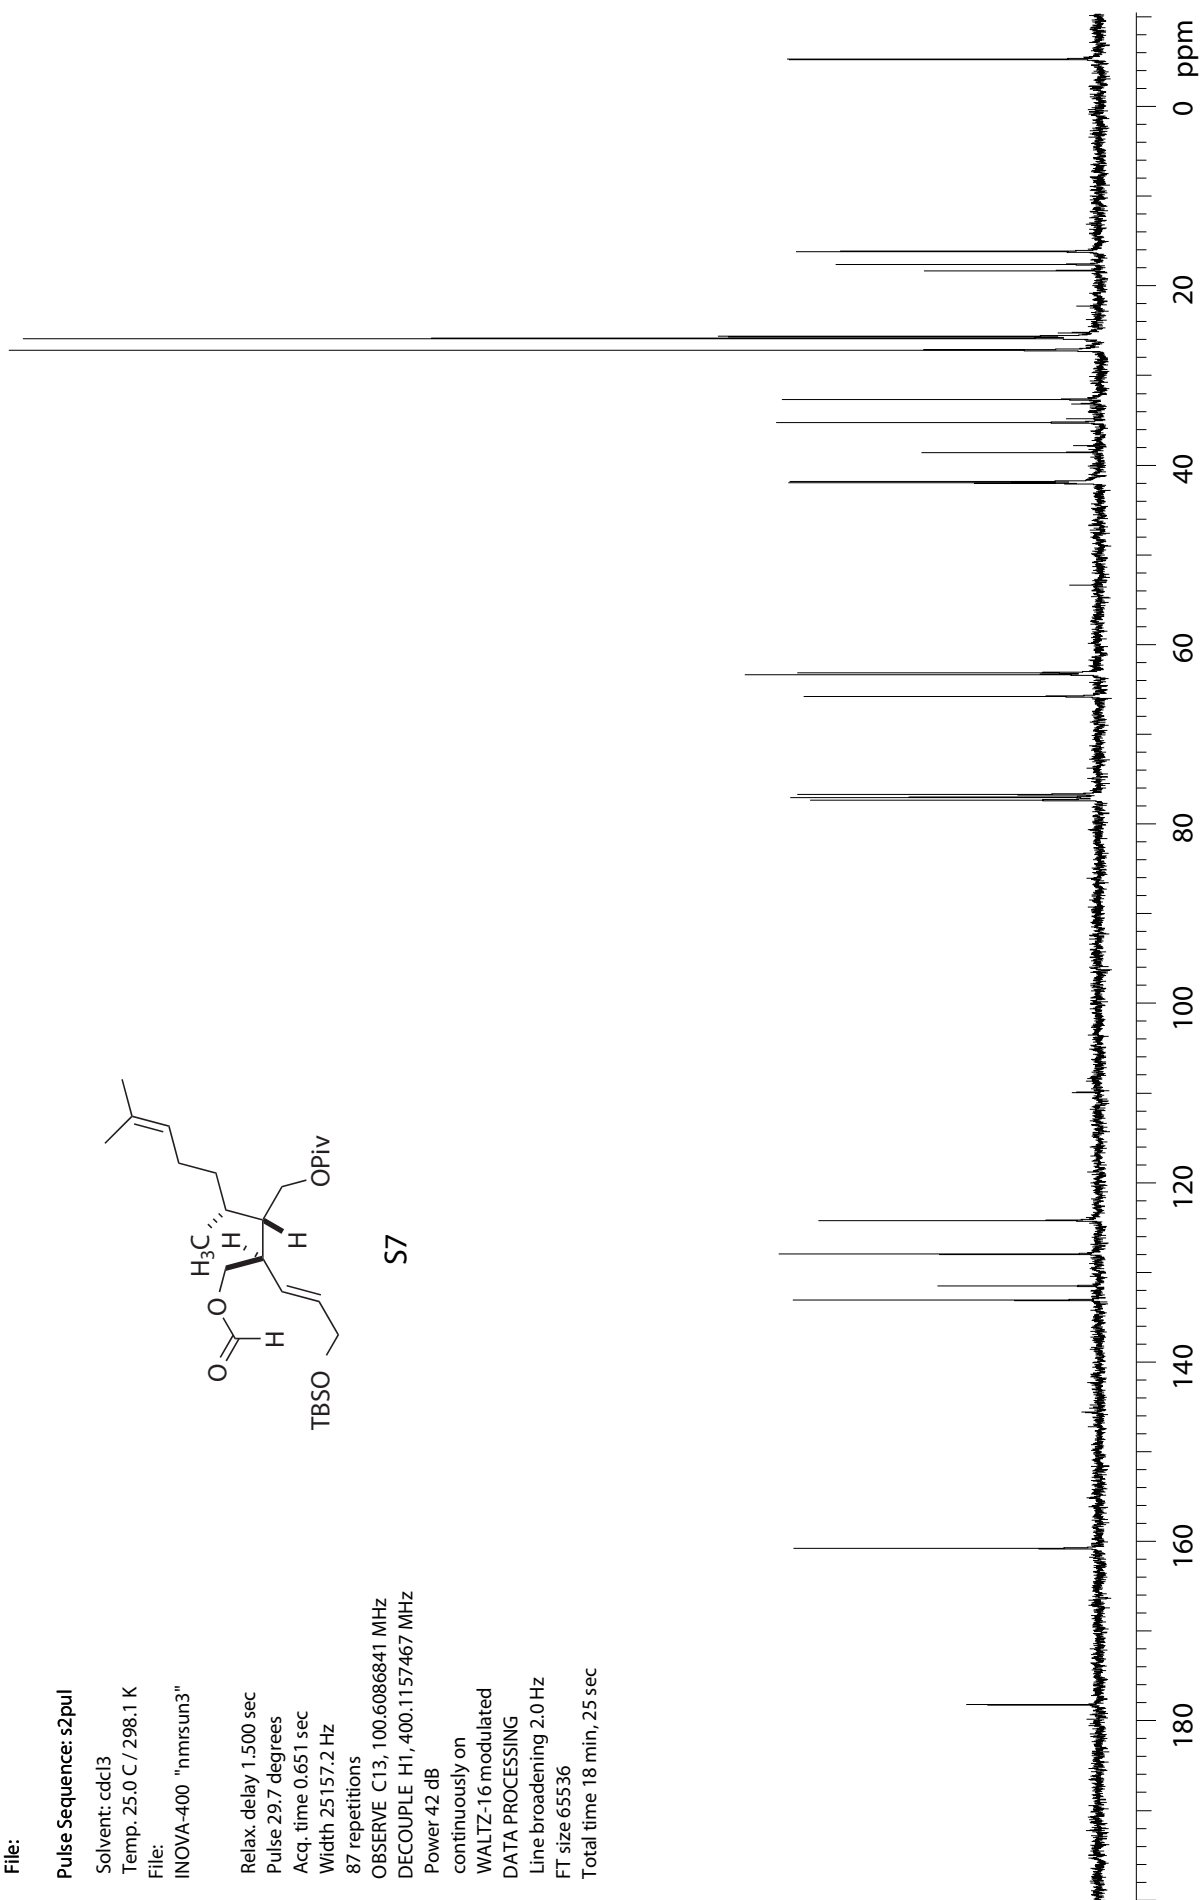

3-254-1H

Archive directory: /i400/dob/vnmrSYS/data  
File:

Pulse Sequence: s2pul

Solvent: cdcl3

Temp. 25.0 C / 298.1 K

User: 1-12-87

File:  
INOVA-400 "nrmr3"

Relax. delay 1.000 sec

Pulse 45.0 degrees

Acq. time 2.003 sec

Width 6402.0 Hz

16 repetitions

OBSERVE H1, 400.1137398 MHz

DATA PROCESSING

Line broadening 0.5 Hz

FT size 65536

Total time 0 min, 48 sec

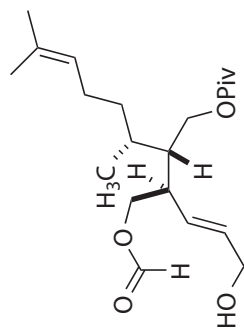

S8

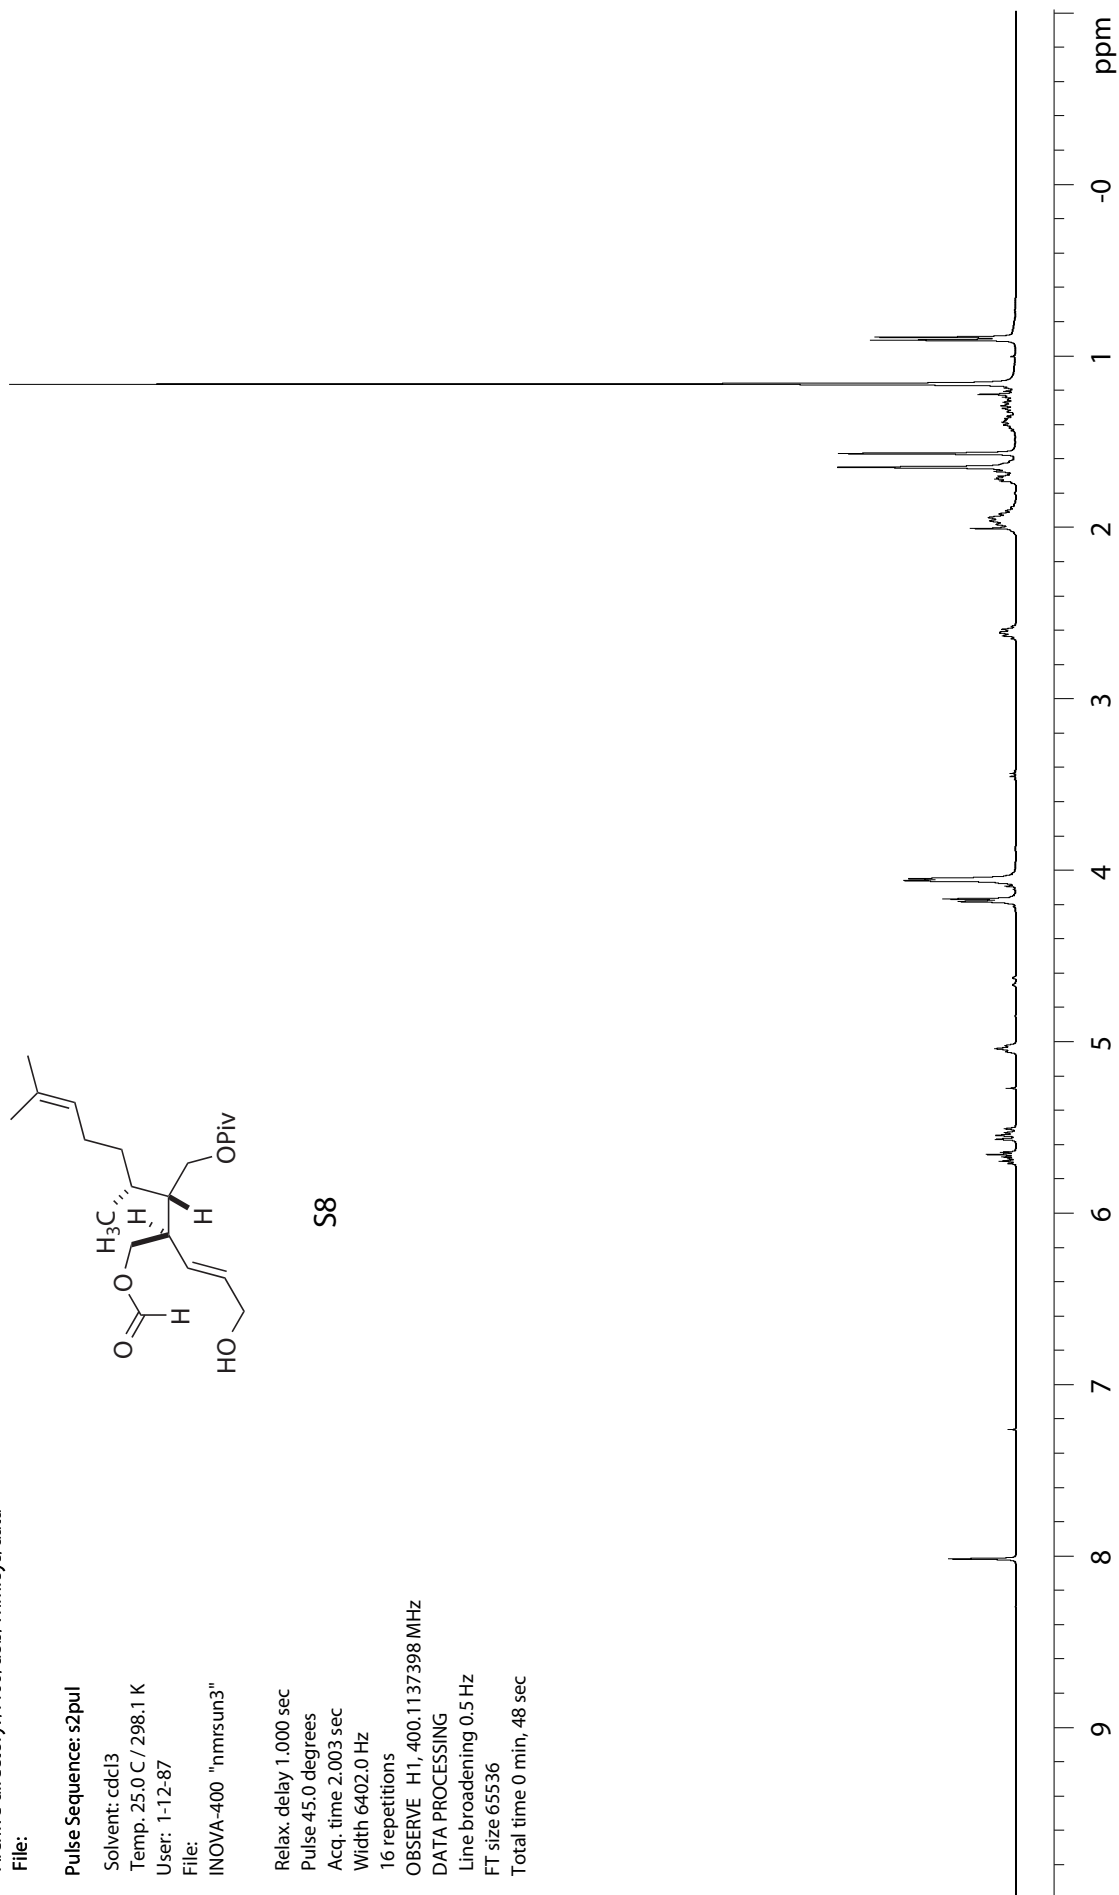

3-227-13C

Archive directory: /i400/dob/vnmrsys/data  
File:

Pulse Sequence: s2pul

Solvent: cdc13

Temp: 25.0 C / 298.1 K

File:

INOVA-400 "nmsun3"

Relax. delay 1.500 sec

Pulse 29.7 degrees

Acq. time 0.651 sec

Width 25157.2 Hz

104 repetitions

OBSERVE C13, 100.6086841 MHz

DECOUPLE H1, 400.1157467 MHz

Power 42 dB

continuously on

WALTZ-16 modulated

DATA PROCESSING

Line broadening 2.0 Hz

FT size 65536

Total time 1 hr, 32 min, 9 sec

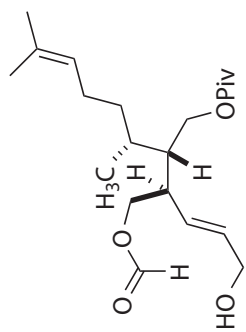

S8

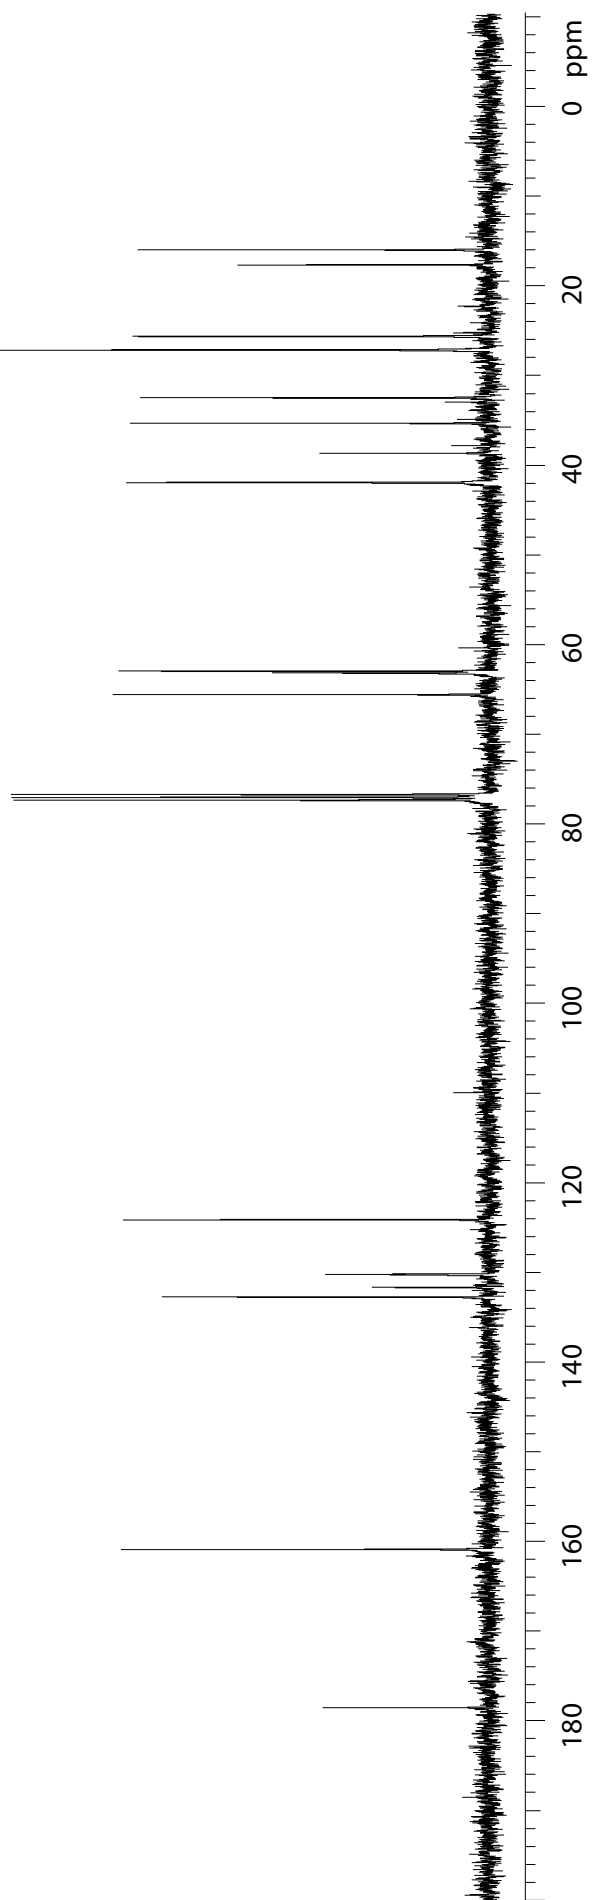

3-261-1H

Archive directory: /i400/dob/vnmrSYS/data  
File:

Pulse Sequence: s2pul

Solvent: cdc13

Temp. 25.0 C / 298.1 K

User: 1-12-87

File:  
INOVA-400 "nrmr3"

Relax. delay 1.000 sec

Pulse 45.0 degrees

Acq. time 2.003 sec

Width 6402.0 Hz

16 repetitions

OBSERVE H1, 400.1137398 MHz

DATA PROCESSING

Line broadening 0.5 Hz

FT size 65536

Total time 0 min, 48 sec

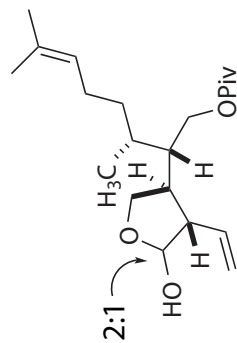

22

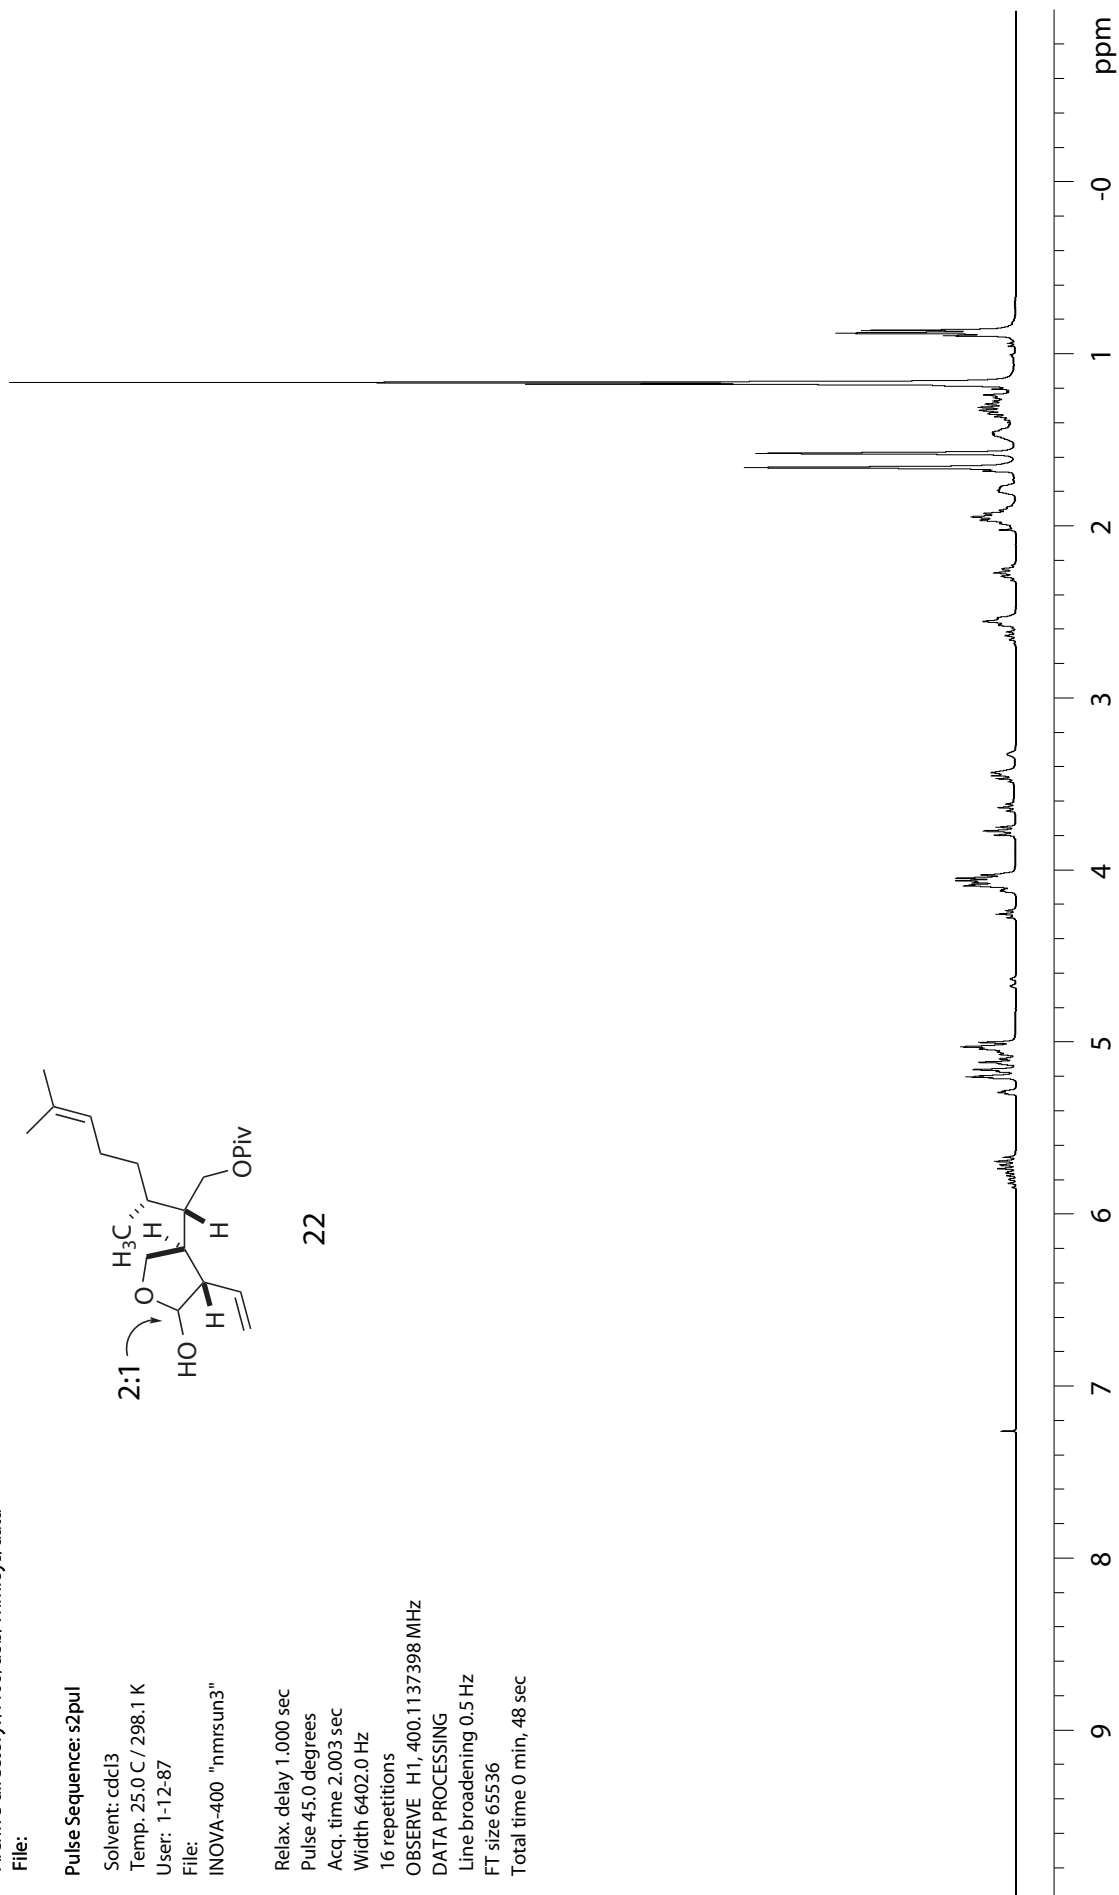

3-261-13C

Archive directory: /i400/dob/vnmrsys/data  
File:

Pulse Sequence: s2pul

Solvent: cdcl3

Temp. 25.0 C / 298.1 K

File:

INOVA-400 "nmsun3"

Relax. delay 1.500 sec

Pulse 29.7 degrees

Acq. time 0.651 sec

Width 25157.2 Hz

234 repetitions

OBSERVE C13, 100.6086833 MHz

DECOUPLE H1, 400.1157467 MHz

Power 42 dB

continuously on

WALTZ-16 modulated

DATA PROCESSING

Line broadening 2.0 Hz

FT size 65536

Total time 9 min, 12 sec

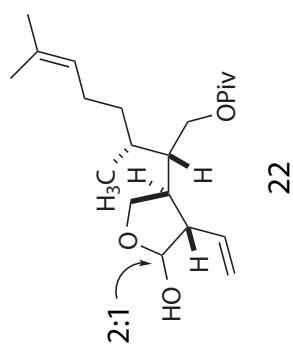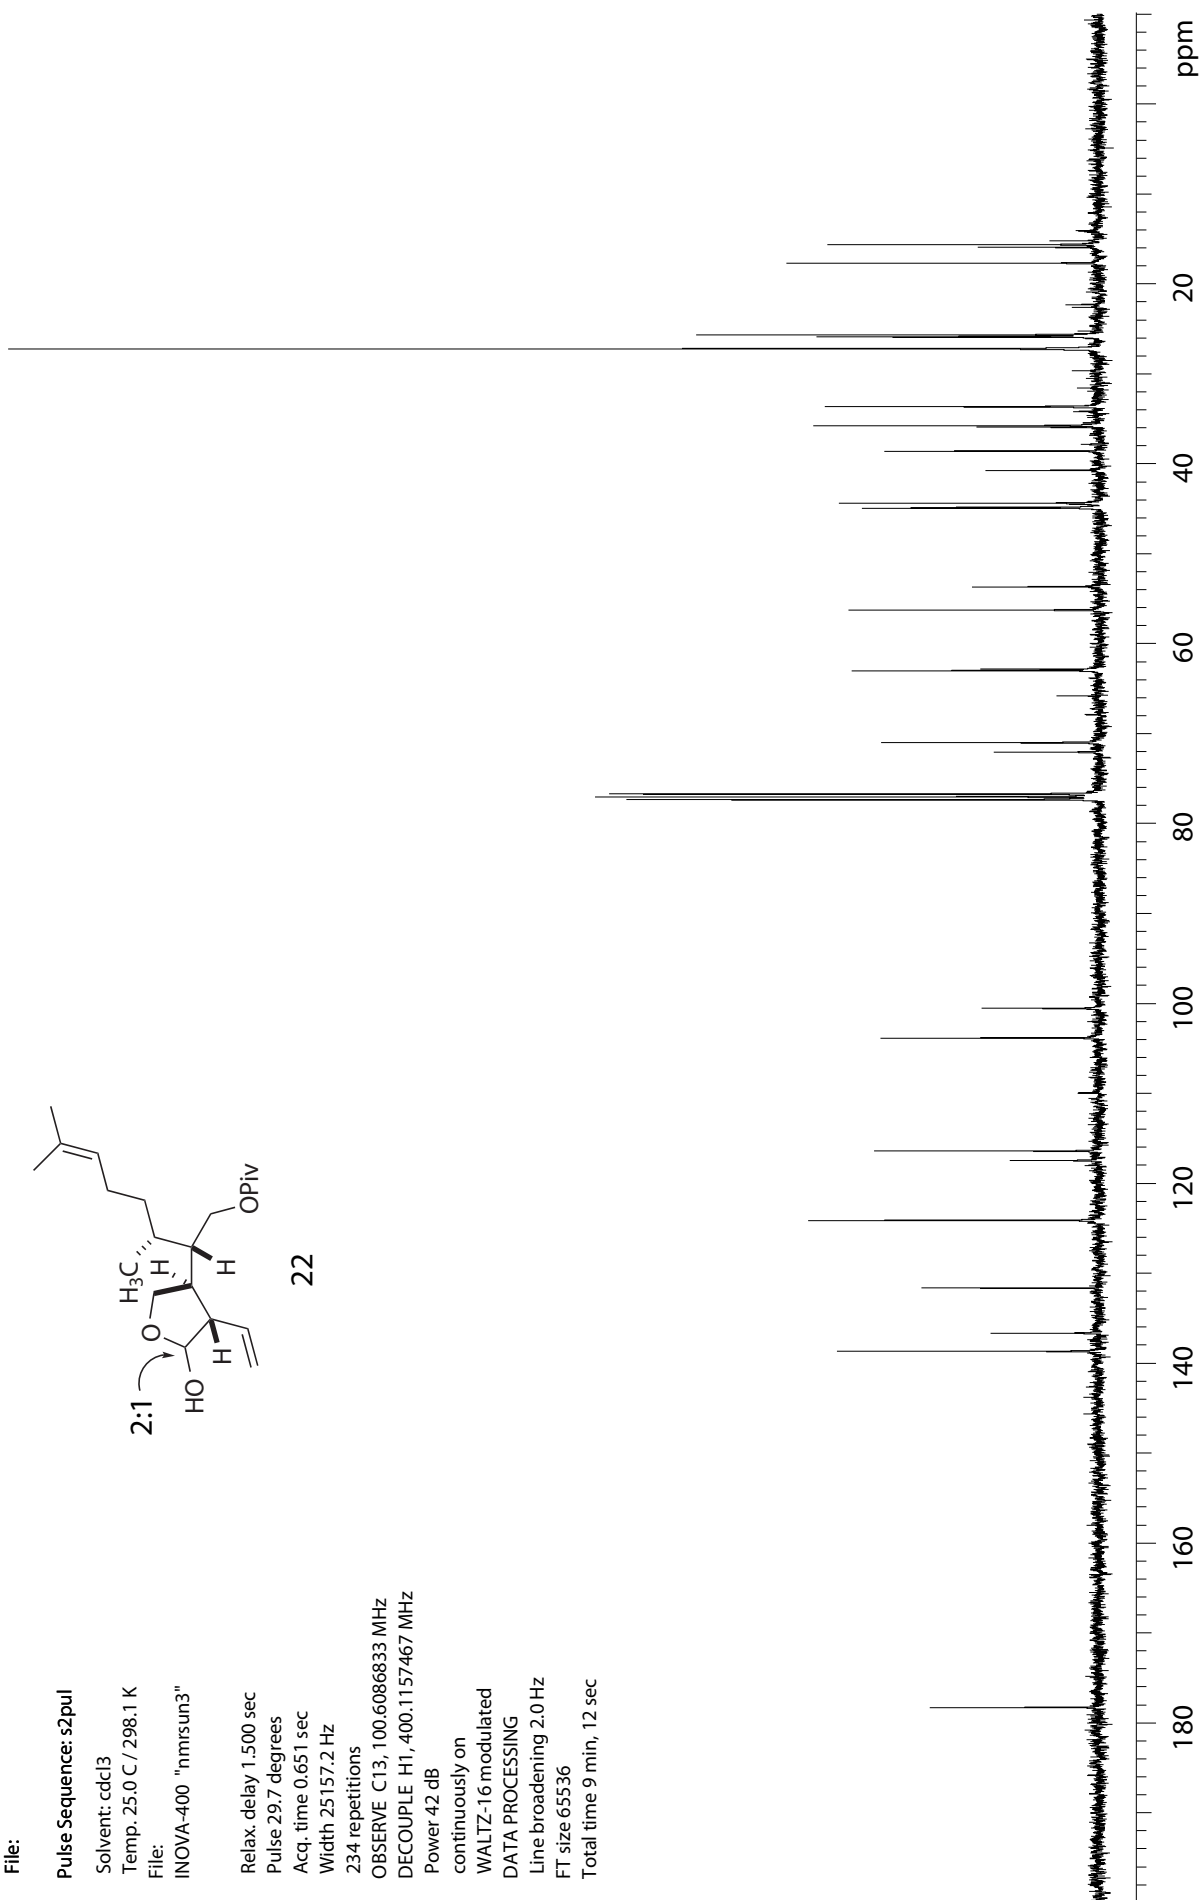

4-165-1H

Archive directory: /vxr400/dob/vnmr/ys/data  
File:

Pulse Sequence: s2pul

Solvent: cdcl3

Temp. 25.0 C / 298.1 K

File: INOVA-400 "nrmisun3"

Relax. delay 1.000 sec

Pulse 45.0 degrees

Acq. time 2.000 sec

Width 5999.7 Hz

16 repetitions

OBSERVE H1, 399.7076472 MHz

DATA PROCESSING

Line broadening 0.5 Hz

FT size 65536

Total time 0 min, 48 sec

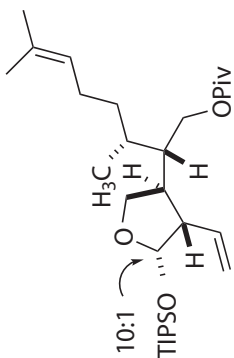

24

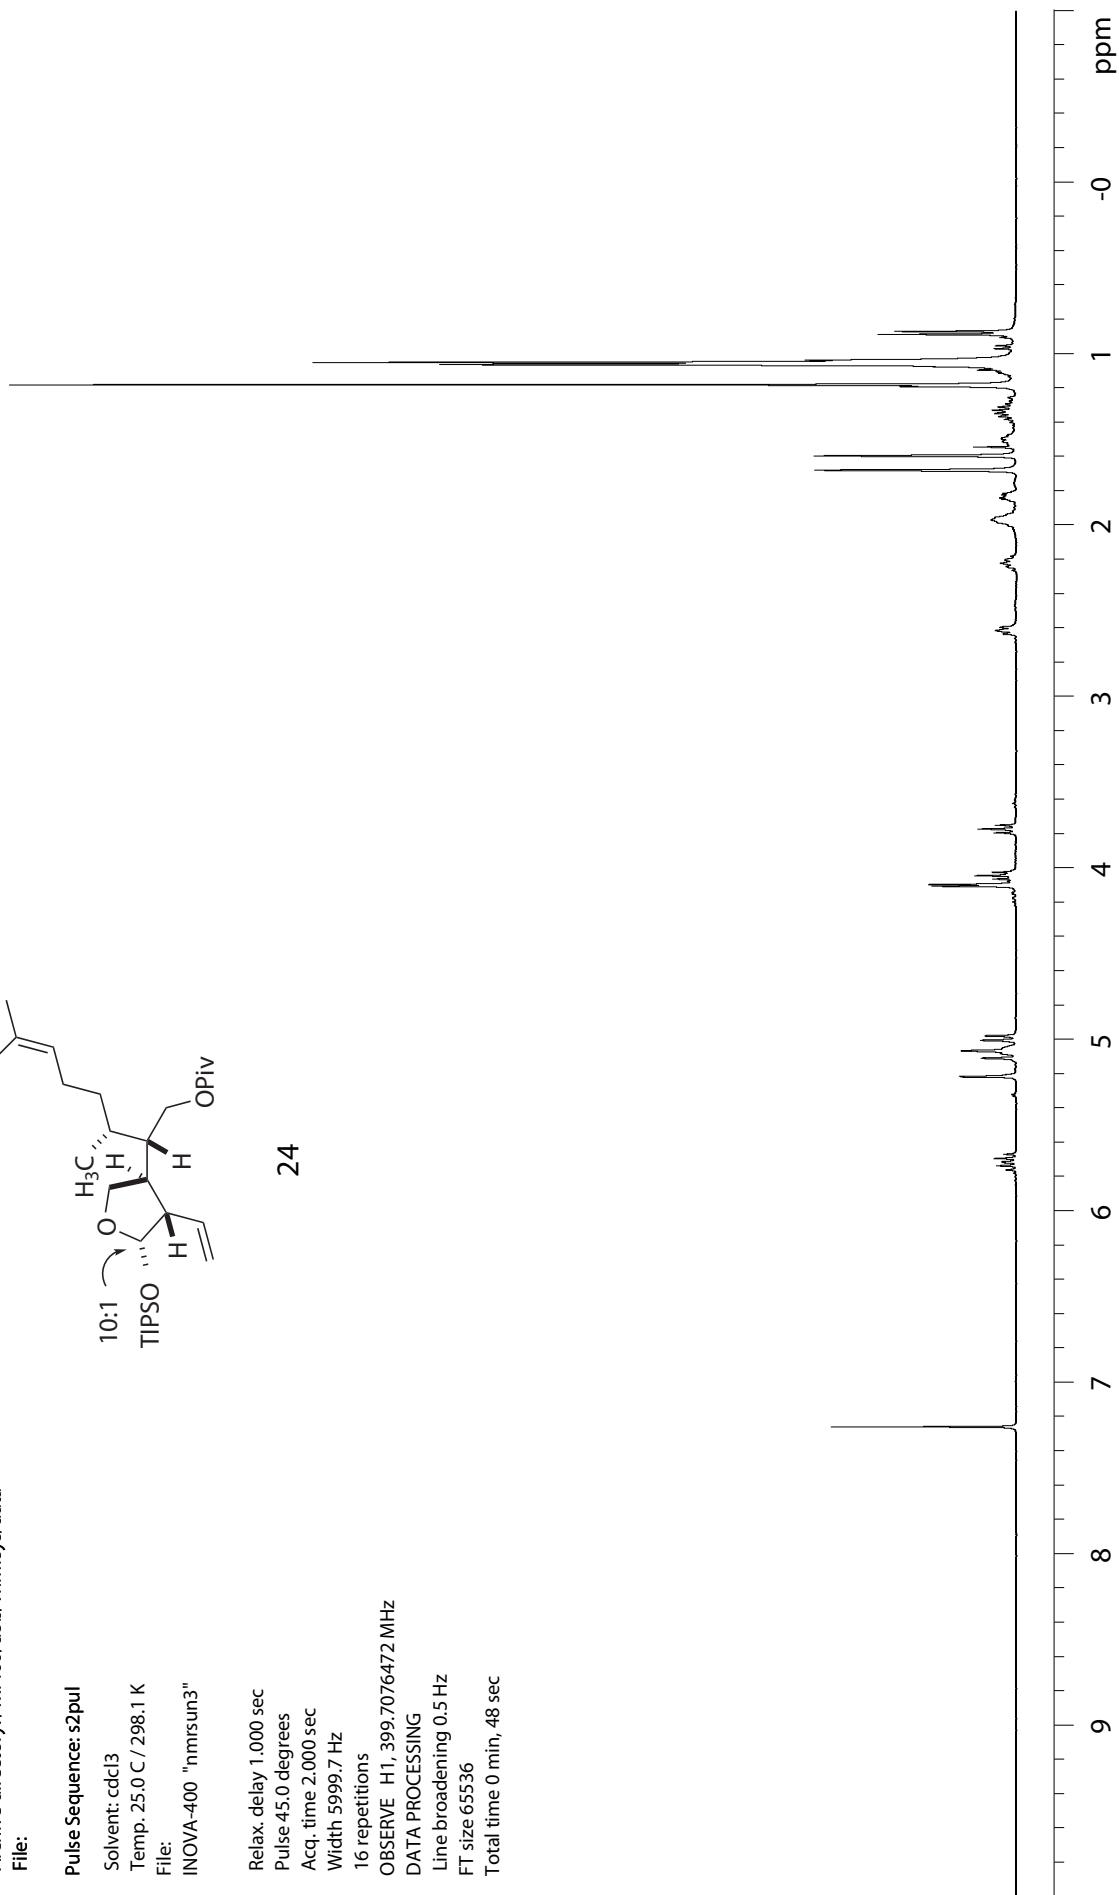

4-66-13C

## File:

Pulse Sequence: s2pul

Solvent: cdd13

Temp. 25.0 C / 298.1 K

Operator: maw

File:

INOVA-400 "nmsun3"

Relax. delay 3.000 sec

Pulse 30.0 degrees

Acq. time 1.300 sec

Width 30165.9 Hz

128 repetitions

OBSERVE C13, 125.6759644 MHz

DECOUPLE H1, 499.8070831 MHz

Power 45 dB

continuously on

WALTZ-16 modulated

DATA PROCESSING

Line broadening 2.5 Hz

FT size 131072

Total time 2 hr, 27 min, 5 sec

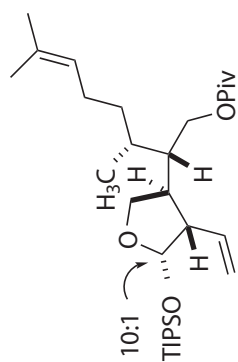

24

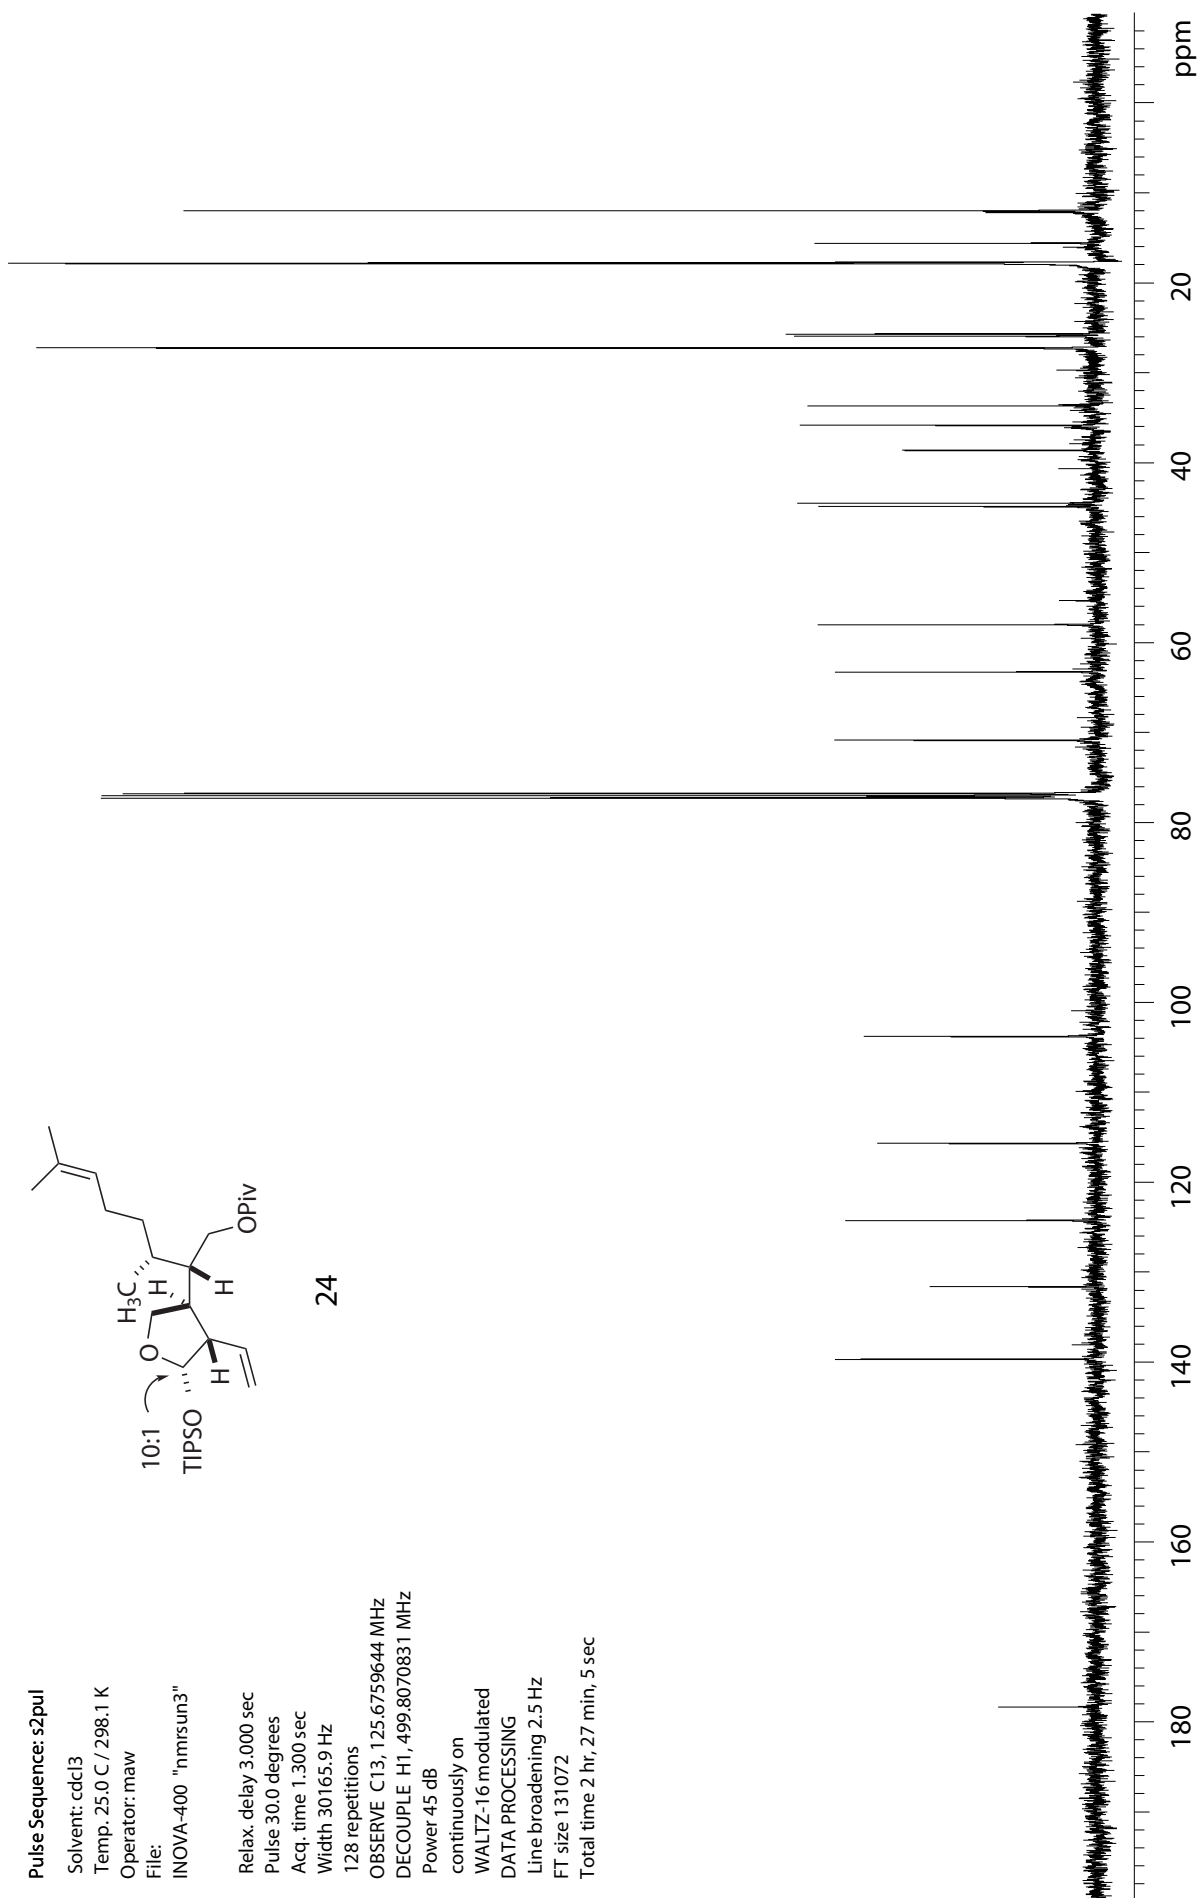

4-280-1H

Archive directory: /vxr400/vnmr1/vnmr1sys/data  
File:

Pulse Sequence: s2pul

Solvent: cdcl3

Temp. 25.0 C / 298.1 K

Operator: maw

File:

INOVA-400 "nrmisun3"

Relax. delay 1.000 sec

Pulse 45.0 degrees

Acq. time 2.730 sec

Width 6000.6 Hz

16 repetitions

OBSERVE H1, 400.1137399 MHz

DATA PROCESSING

Line broadening 0.3 Hz

FT size 65536

Total time 0 min, 59 sec

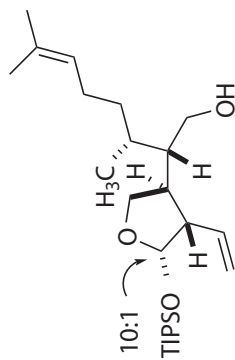

S9

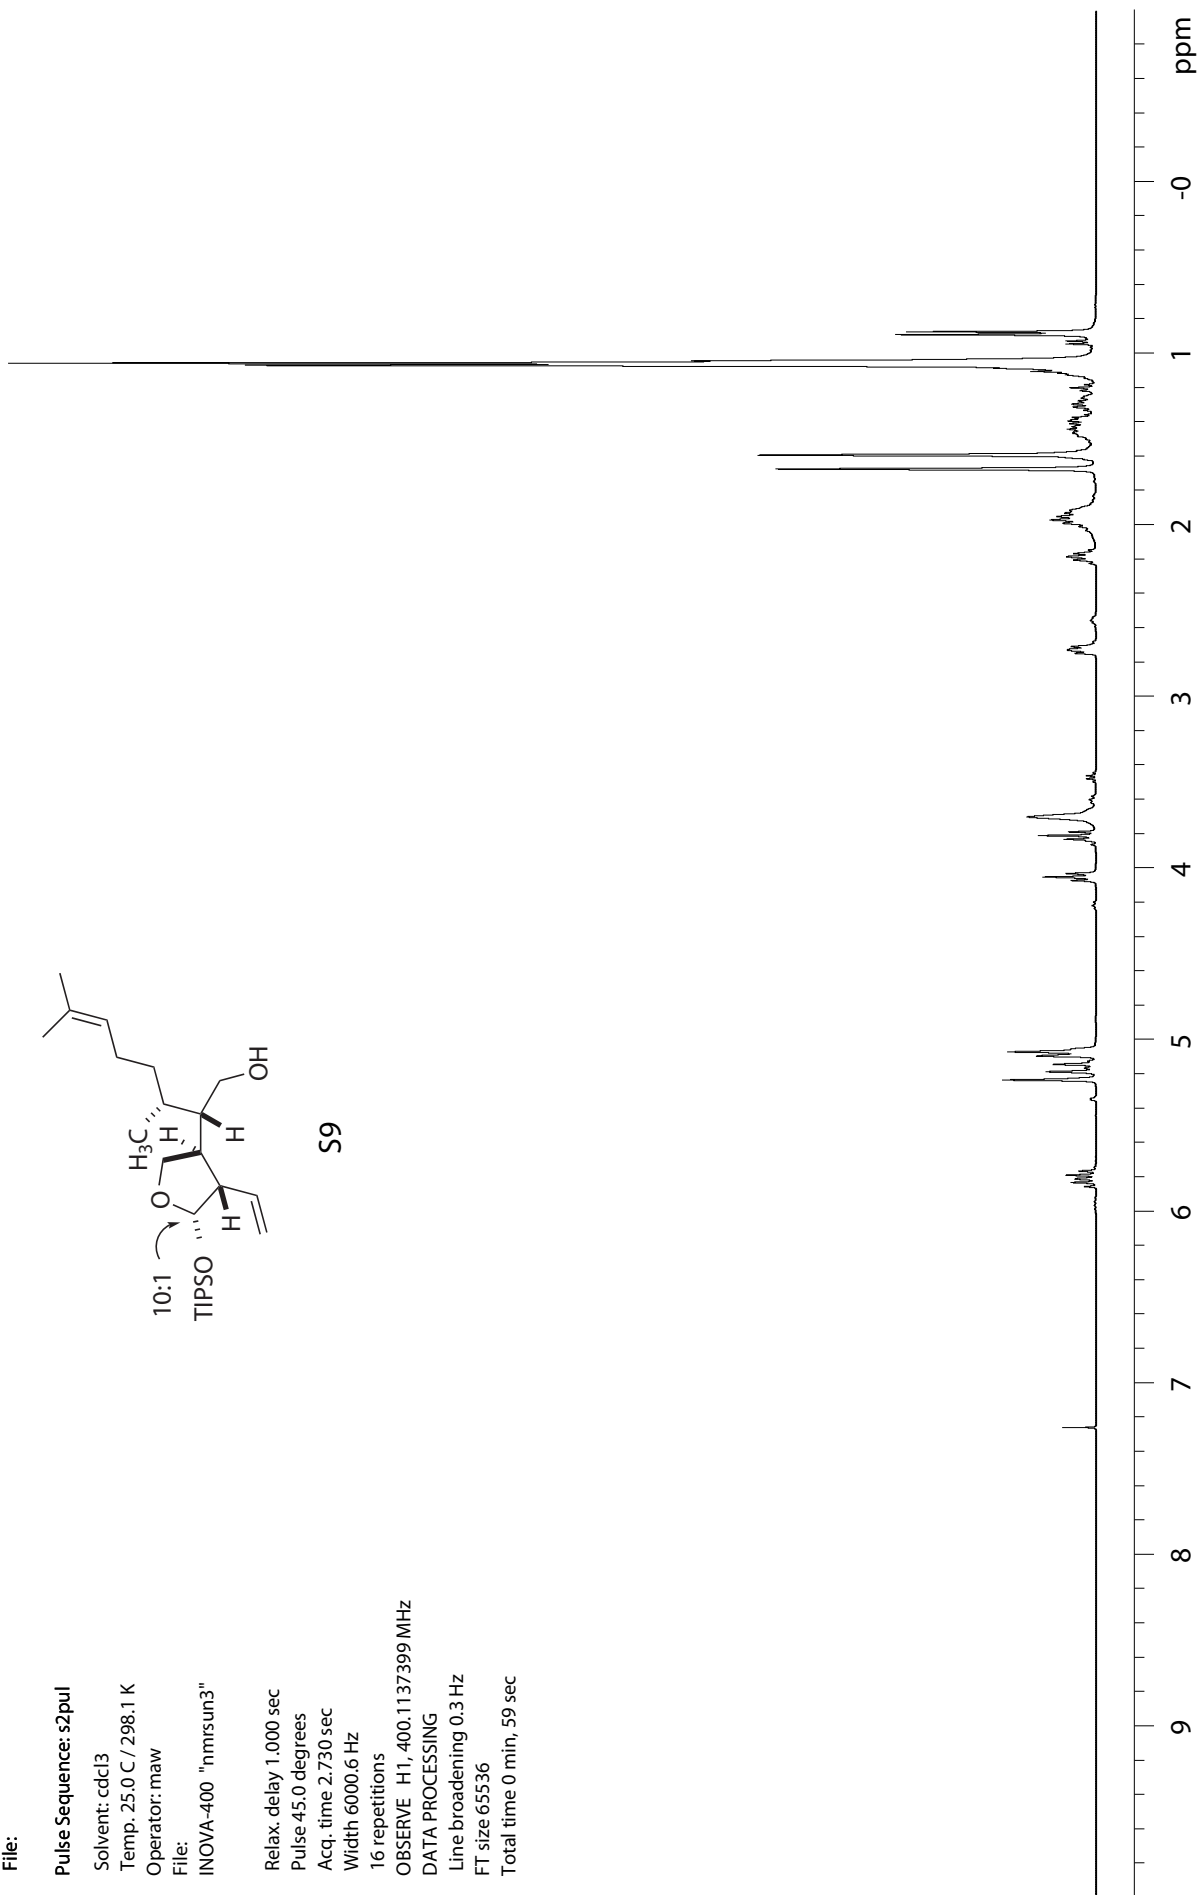



4-280-13C

Archive directory: /i400/dob/vnmrSYS/data  
File:

Pulse Sequence: s2pul

Solvent: cdc13

Temp. 25.0 C / 298.1 K

Operator: maw

File:

INOVA-400 "nrmisun3"

Relax. delay 1.500 sec

Pulse 29.7 degrees

Acq. time 0.651 sec

Width 25157.2 Hz

256 repetitions

OBSERVE C13, 100.6086574 MHz

DECOUPLE H1, 400.1157467 MHz

Power 42 dB

continuously on

WALTZ-16 modulated

DATA PROCESSING

Line broadening 2.0 Hz

FT size 65536

Total time 9 min, 12 sec

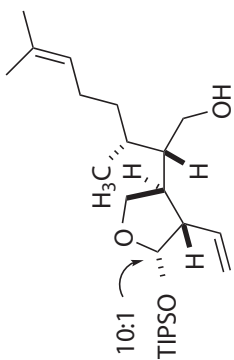

S9

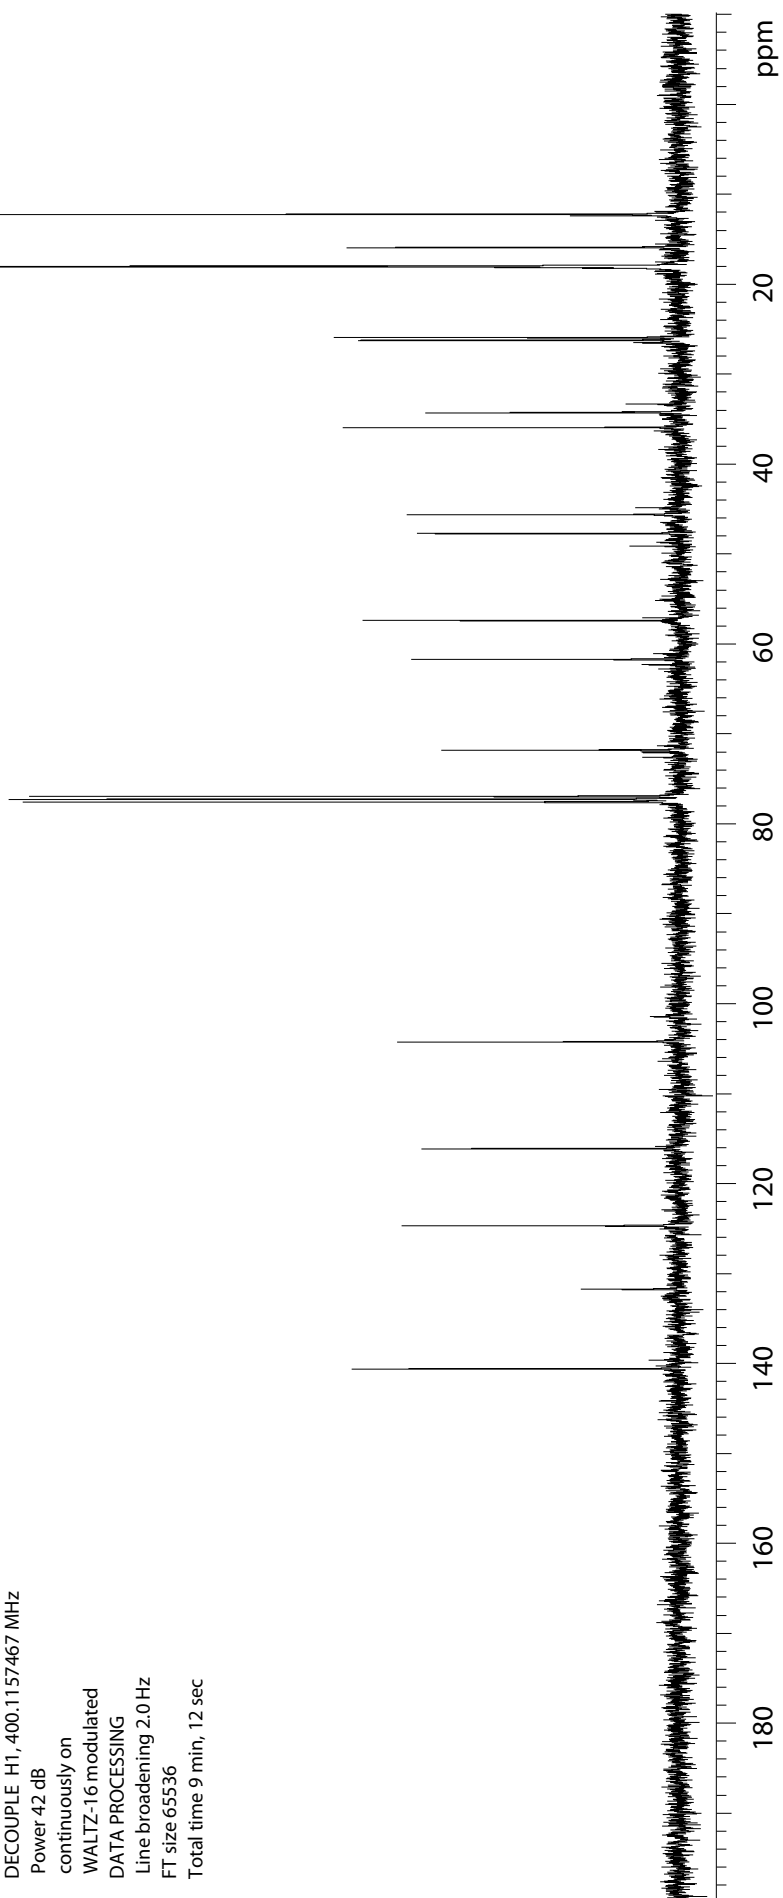

4-82-1H

Archive directory: /i400/dob/vnmrSYS/data  
File:

Pulse Sequence: s2pul

Solvent: cdcl3

Temp. 25.0 C / 298.1 K

User: 1-12-87

File:

INOVA-400 "nrmrSun3"

Relax. delay 1.000 sec

Pulse 45.0 degrees

Acq. time 2.003 sec

Width 6402.0 Hz

16 repetitions

OBSERVE H1, 400.1137400 MHz

DATA PROCESSING

Line broadening 0.5 Hz

FT size 65536

Total time 0 min, 48 sec

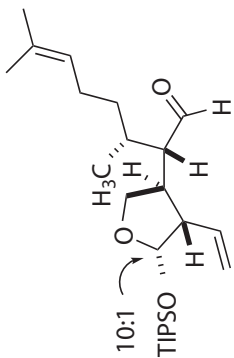

25

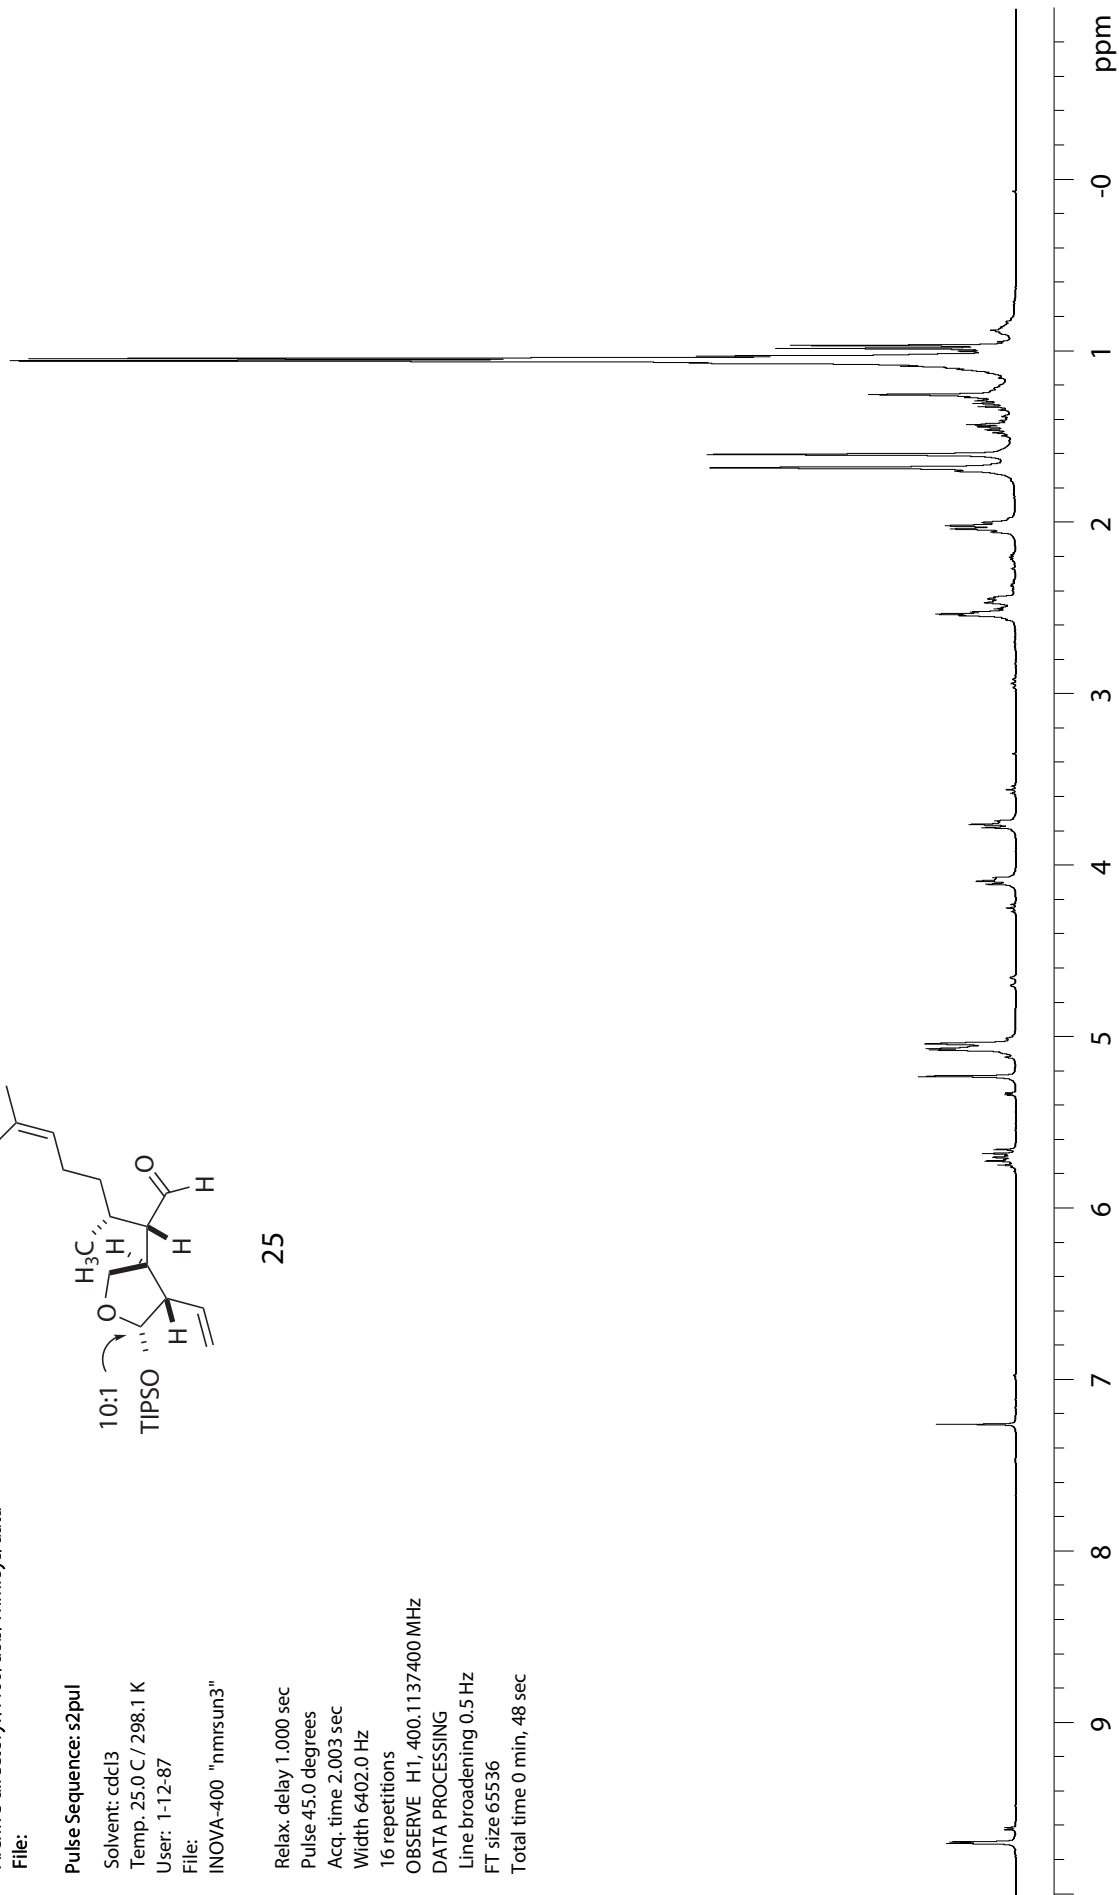

4-224-13C

Archive directory: /i400/dob/vnmrsys/data  
File:

Pulse Sequence: s2pul

Solvent: cdcl3

Temp. 25.0 C / 298.1 K

Operator: maw

File:

INOVA-400 "nrmr3"

Relax. delay 1.500 sec

Pulse 29.7 degrees

Acq. time 0.651 sec

Width 25157.2 Hz

1988 repetitions

OBSERVE C13, 100.6086795 MHz

DECOUPLE H1, 400.1157467 MHz

Power 42 dB

continuously on

WALTZ-16 modulated

DATA PROCESSING

Line broadening 2.0 Hz

FT size 65536

Total time 1 hr, 13 min, 43 sec

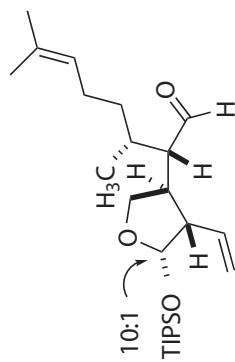

25

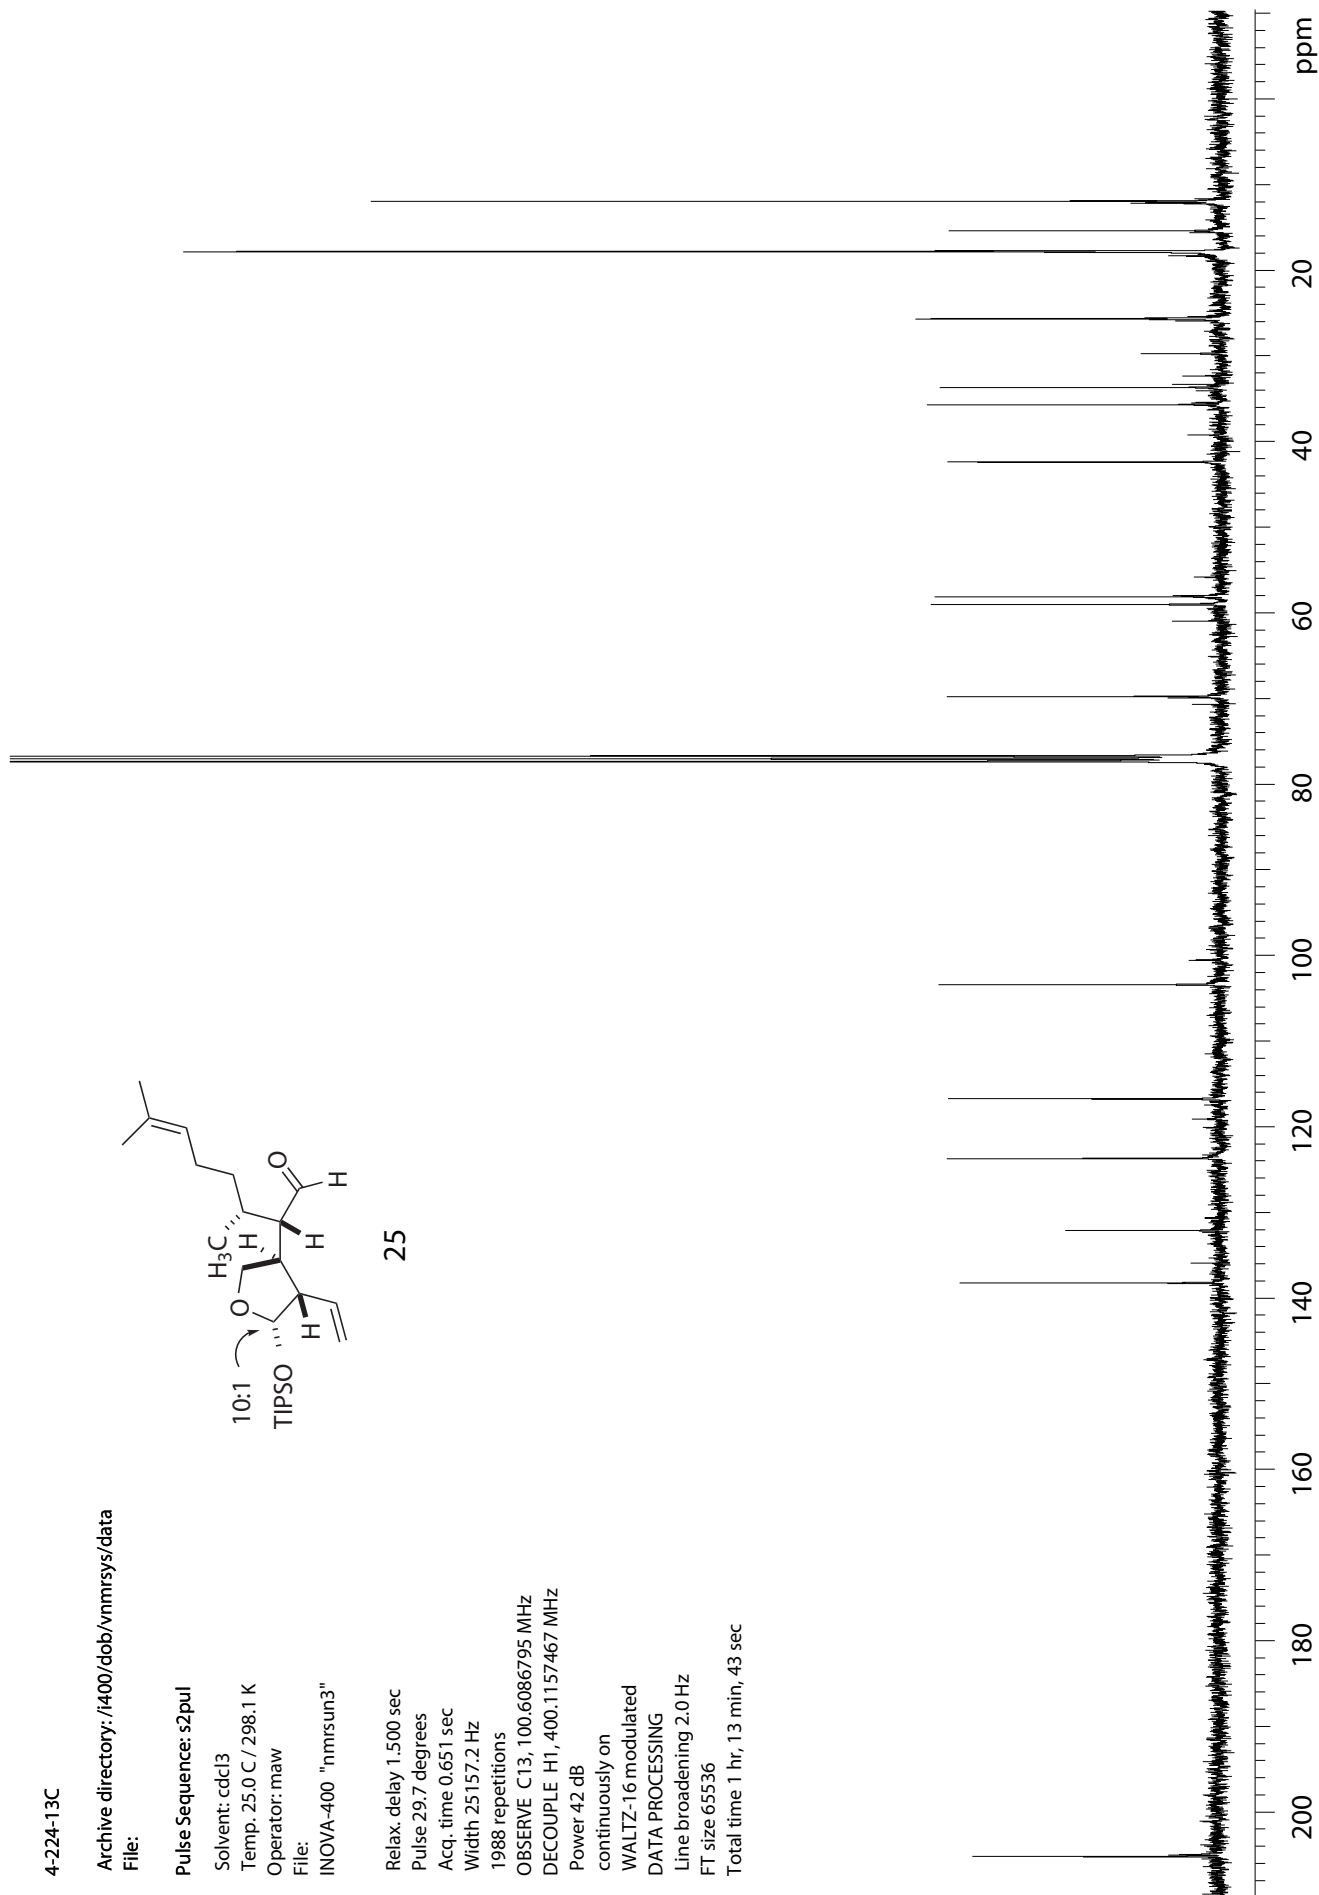

4-179-1H

Archive directory: /i400/dob/vnmrSYS/data  
File:

Pulse Sequence: s2pul

Solvent: cdc13

Temp. 25.0 C / 298.1 K

Operator: maw

File:

INOVA-400 "nrmrSun3"

Relax. delay 1.000 sec

Pulse 45.0 degrees

Acq. time 2.003 sec

Width 6402.0 Hz

16 repetitions

OBSERVE H1, 400.1137400 MHz

DATA PROCESSING

Line broadening 0.5 Hz

FT size 65536

Total time 0 min, 48 sec

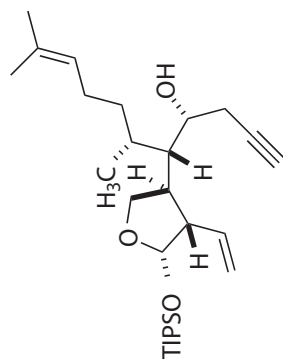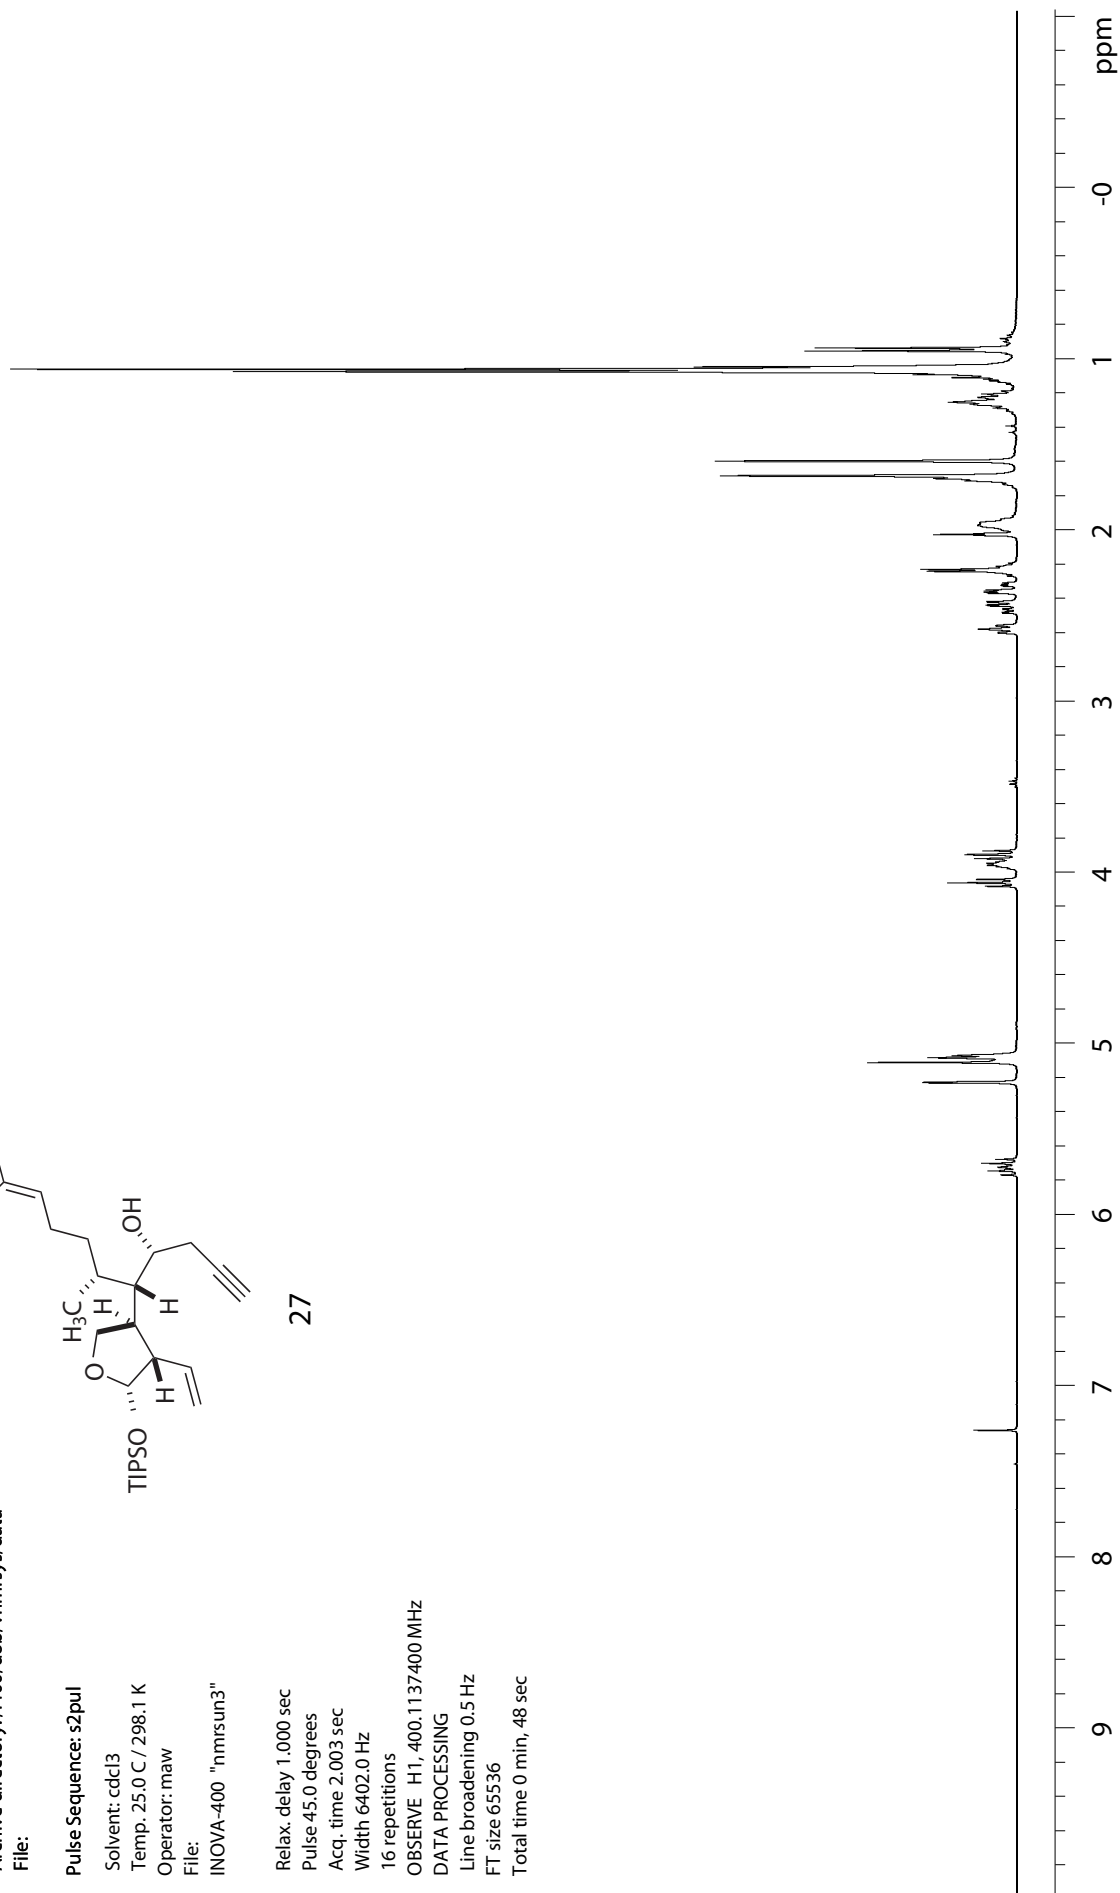

4-179-13C

Archive directory: /i400/dob/vnmrSYS/data  
File:

Pulse Sequence: s2pul

Solvent: cdcl3

Temp. 25.0 C / 298.1 K

Operator: maw

File:

INOVA-400 "nrmrSun3"

Relax. delay 1.500 sec

Pulse 29.7 degrees

Acq. time 0.651 sec

Width 25157.2 Hz

256 repetitions

OBSERVE C13, 100.6086802 MHz

DECOUPLE H1, 400.1157467 MHz

Power 42 dB

continuously on

WALTZ-16 modulated

DATA PROCESSING

Line broadening 2.0 Hz

FT size 65536

Total time 9 min, 12 sec

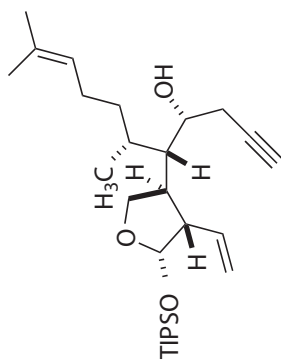

27

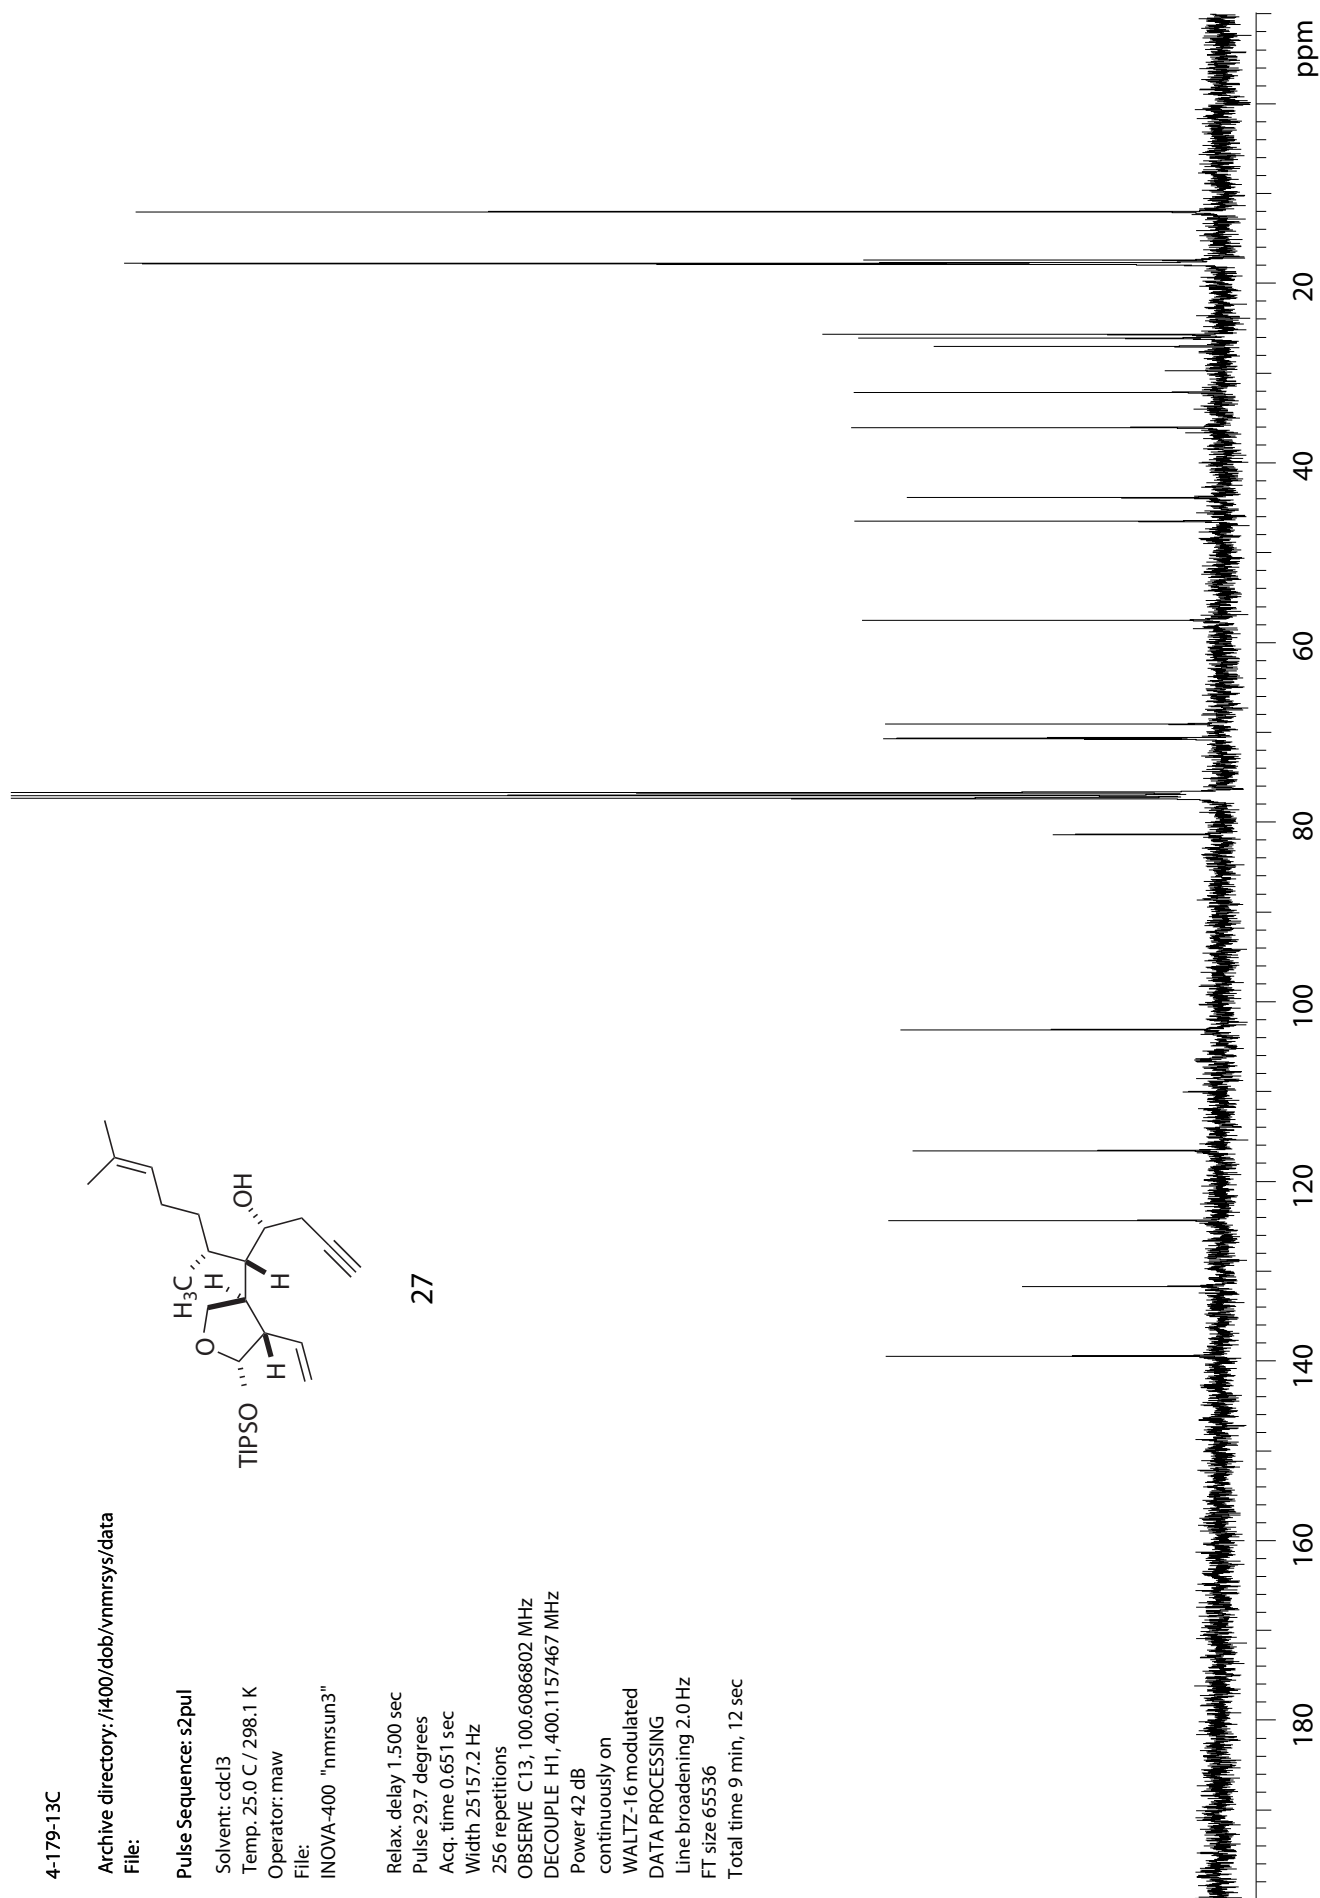

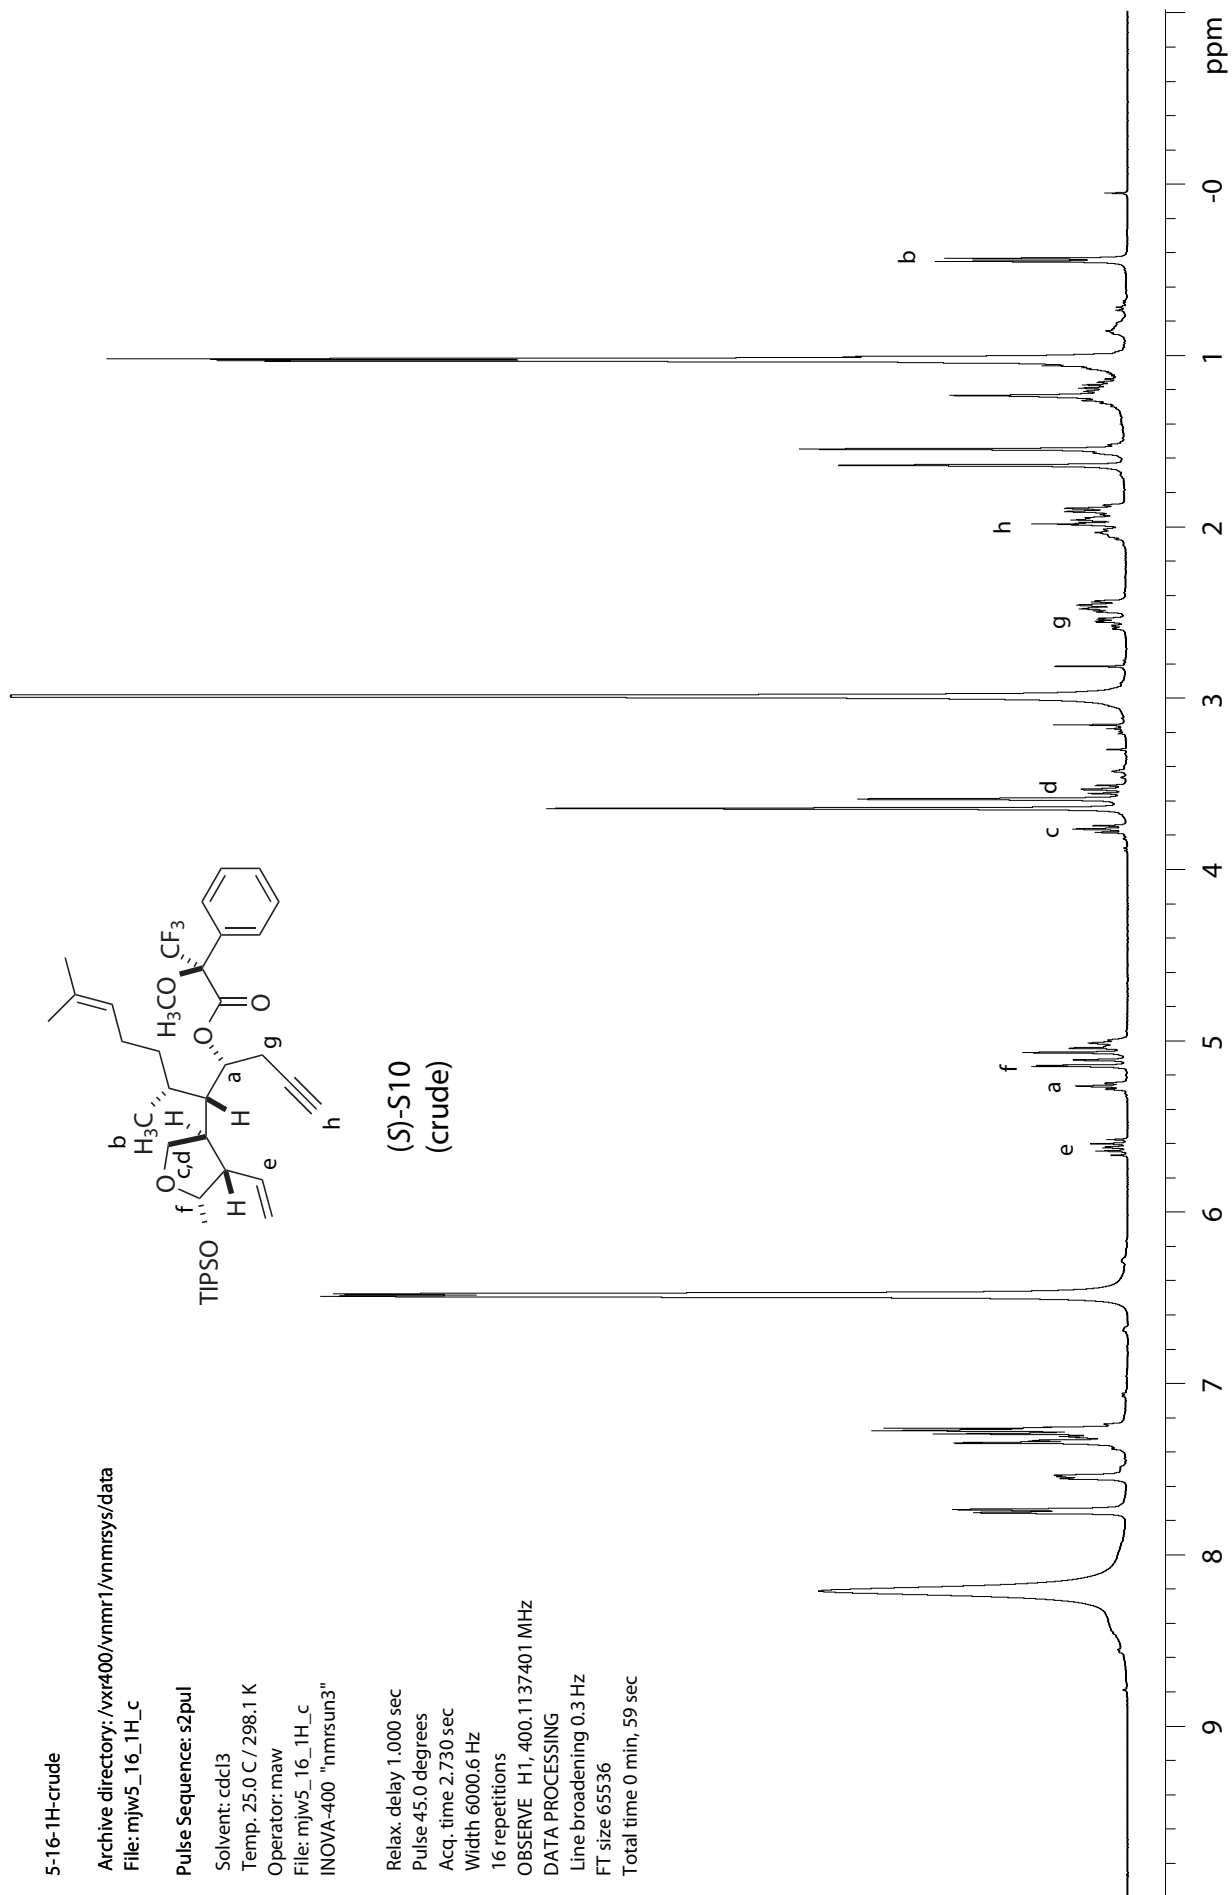

5-15-1H-crude

Archive directory: /vxr400/vnmr1/vnmr1/data  
 File: mjw5\_15\_1H\_c

Pulse Sequence: s2pul  
 Solvent: cdcl3  
 Temp: 25.0 C / 298.1 K  
 Operator: maw  
 File: mjw5\_15\_1H\_c  
 INOVA-400 "nmsun3"

Relax. delay 1.000 sec  
 Pulse 45.0 degrees  
 Acq. time 2.730 sec  
 Width 6000.6 Hz  
 16 repetitions  
 OBSERVE H1, 400.1137395 MHz  
 DATA PROCESSING  
 Line broadening 0.3 Hz  
 FT size 65536  
 Total time 0 min, 59 sec

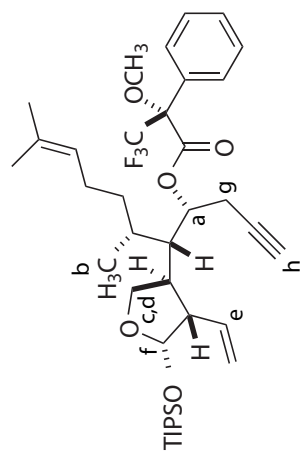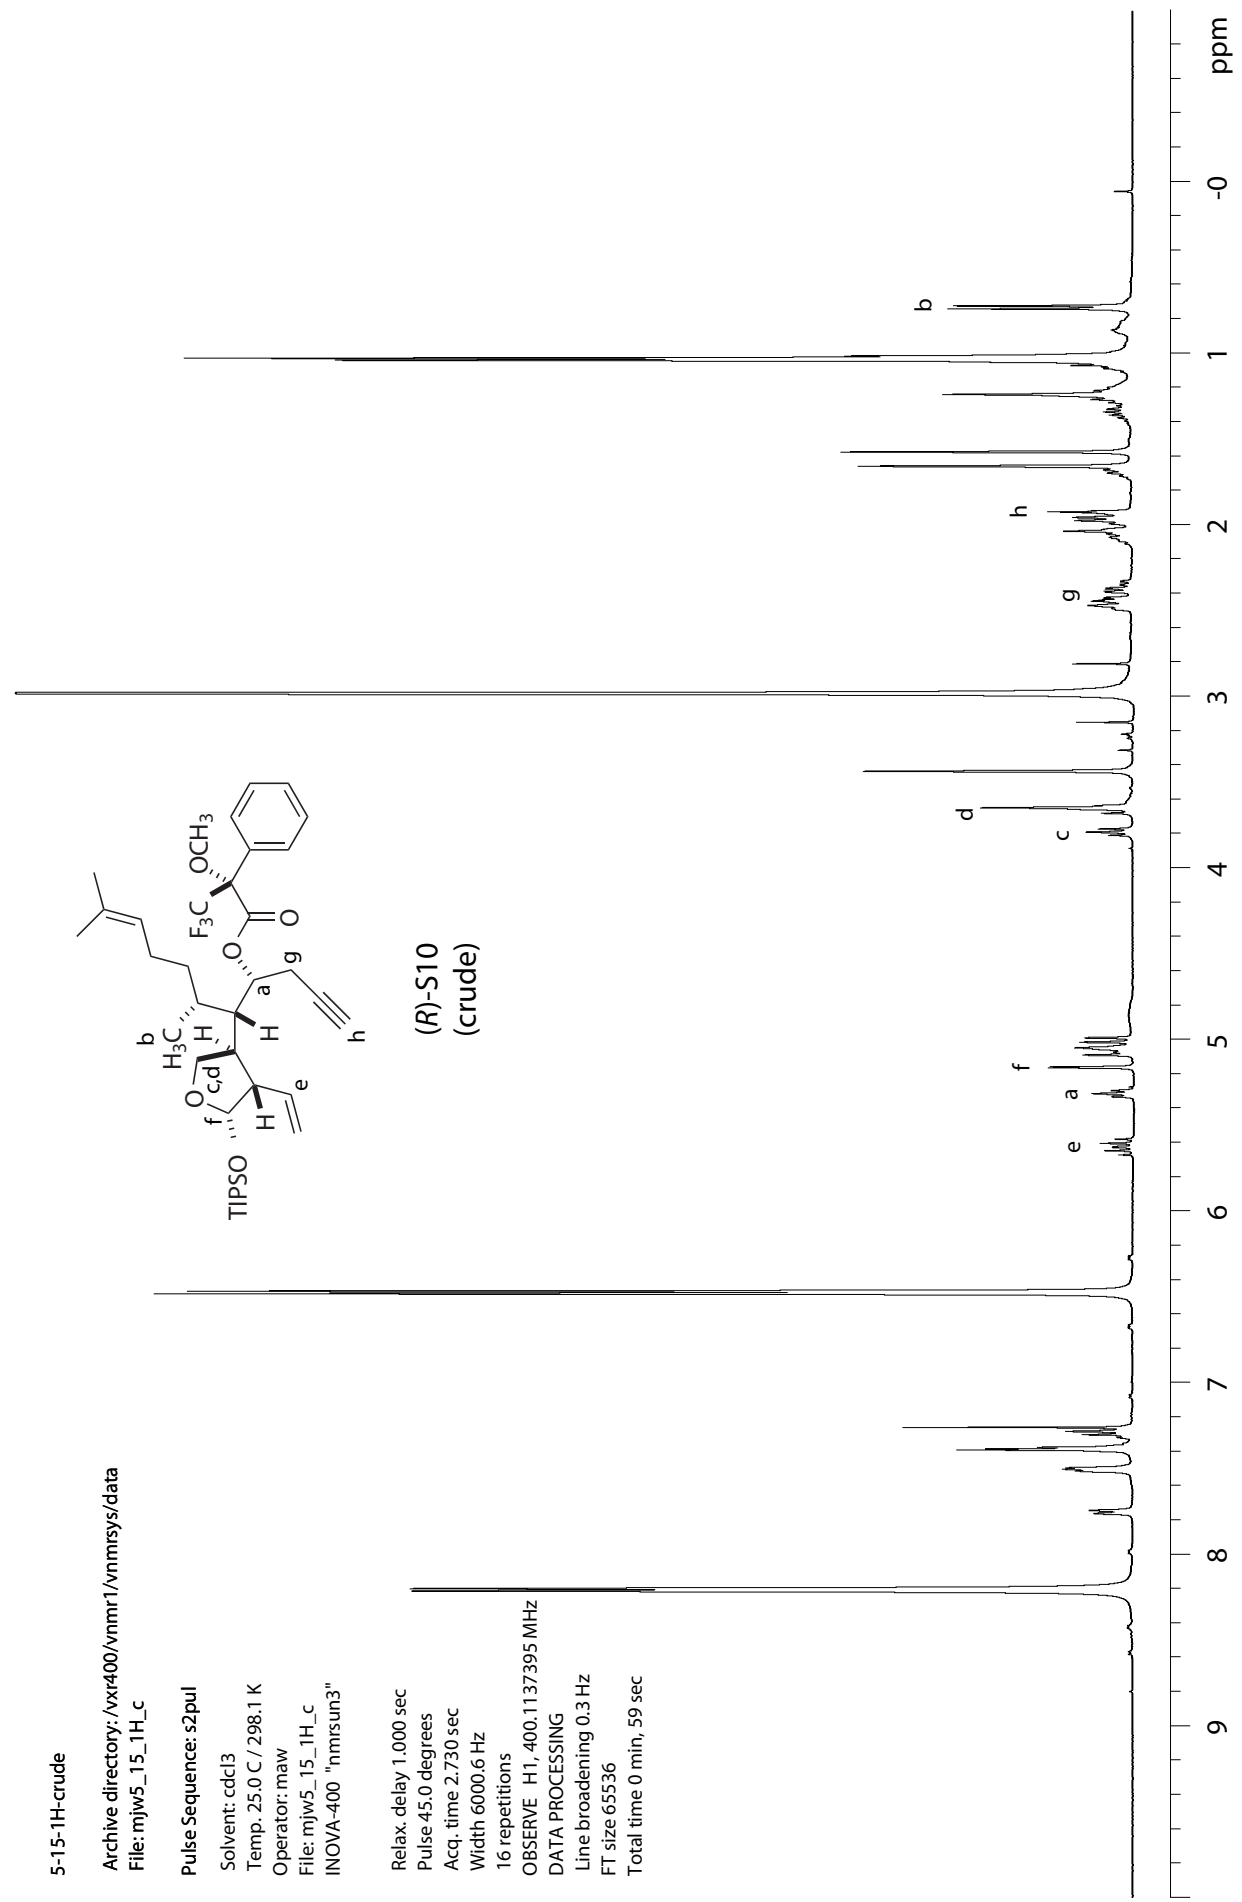

4-184-1H

Archive directory: /i400/dob/vnmrSYS/data

File: mjlw4\_184\_1H\_B

Pulse Sequence: s2pul

Solvent: cdc13

Temp. 25.0 C / 298.1 K

Operator: maw

File: mjlw4\_184\_1H\_B

INOVA-400 "nrmisun3"

Relax. delay 1.000 sec

Pulse 45.0 degrees

Acq. time 2.003 sec

Width 6402.0 Hz

16 repetitions

OBSERVE H1, 400.1137400 MHz

DATA PROCESSING

Line broadening 0.5 Hz

FT size 65536

Total time 0 min, 48 sec

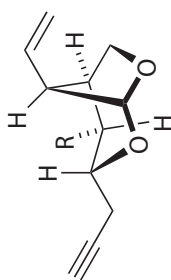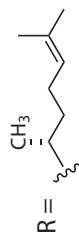

29

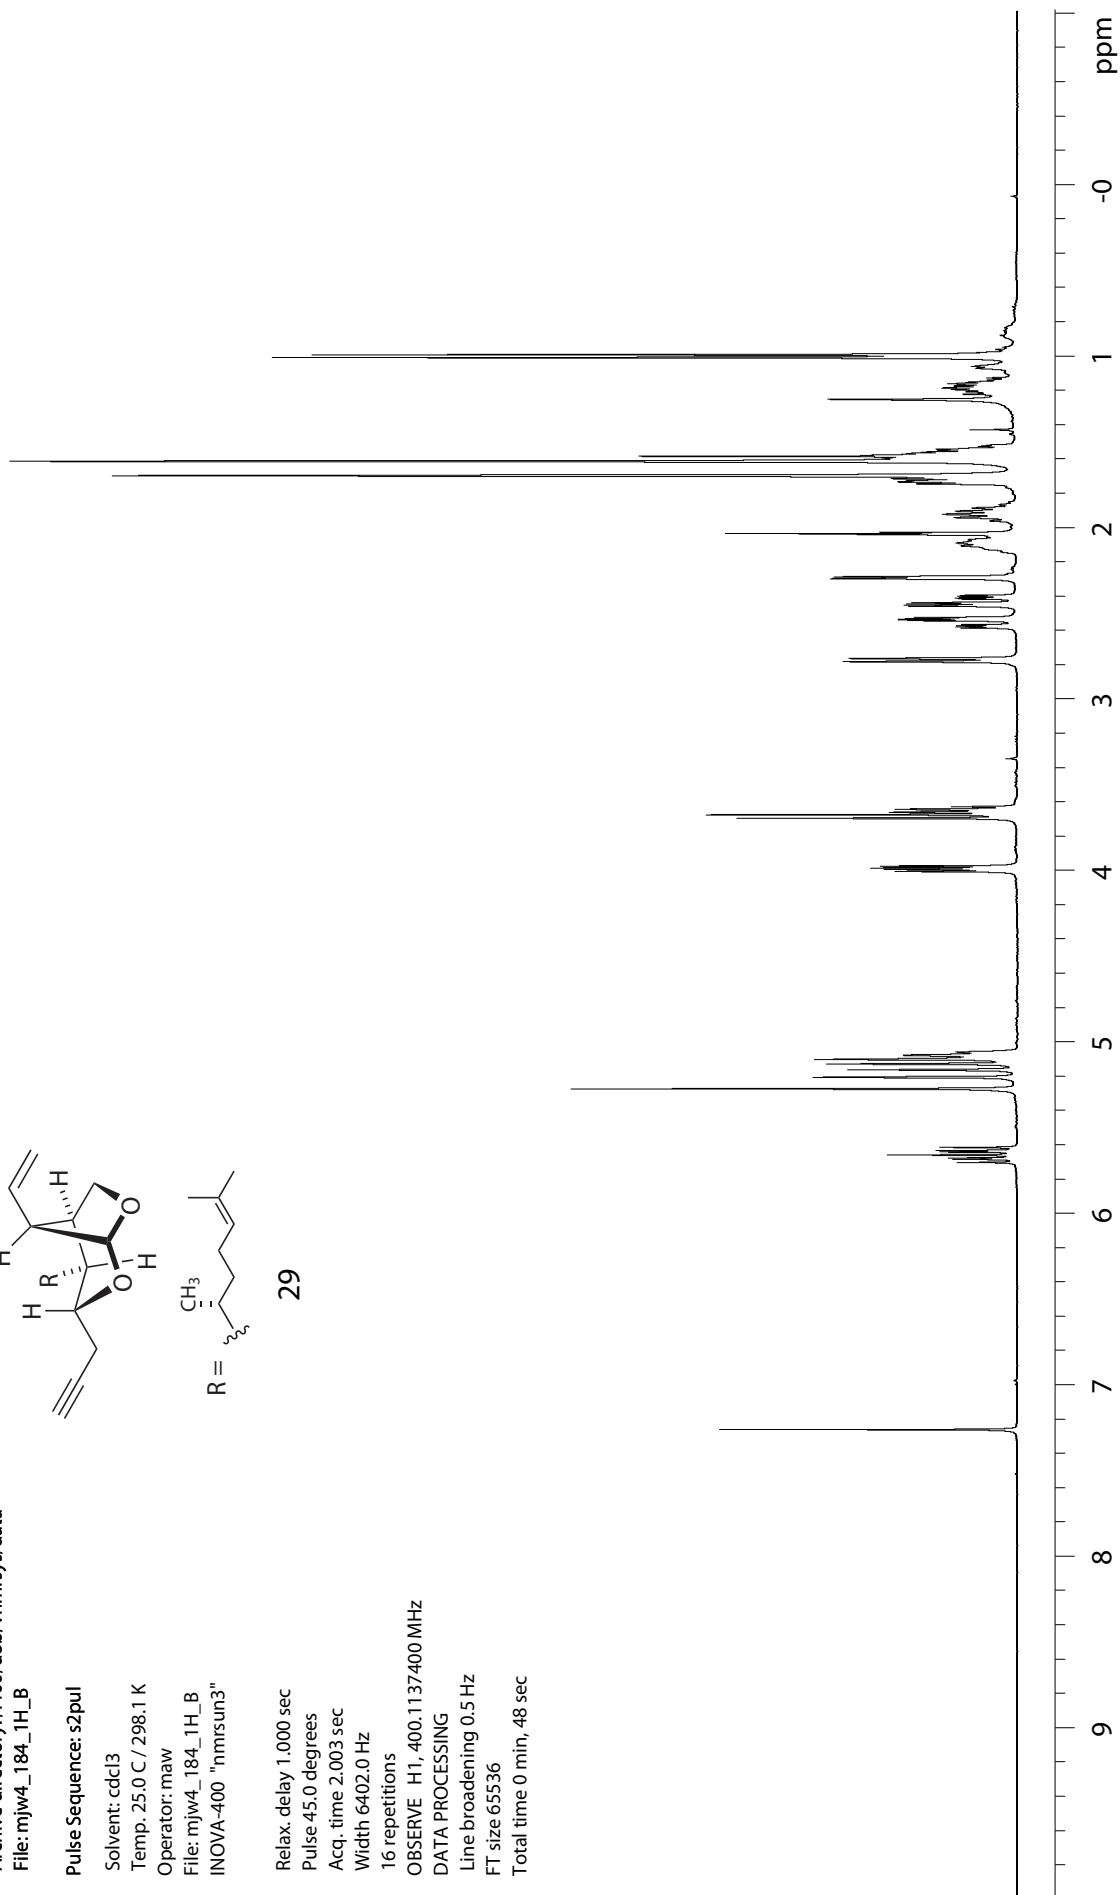



4-184-13C

Archive directory: /i400/dob/vnmrsys/data  
 File: mjjw4\_184\_B\_13C

Pulse Sequence: s2pul

Solvent: cdc13  
 Temp. 25.0 C / 298.1 K  
 Operator: maw  
 File: mjjw4\_184\_B\_13C  
 INOVA-400 "nmrsun3"

Relax. delay 1.500 sec  
 Pulse 29.7 degrees  
 Acq. time 0.651 sec  
 Width 25157.2 Hz  
 5120 repetitions  
 OBSERVE C13, 100.6086795 MHz  
 DECOUPLE H1, 400.1157467 MHz  
 Power 42 dB  
 continuously on  
 WALTZ-16 modulated  
 DATA PROCESSING  
 Line broadening 2.0 Hz  
 FT size 65536  
 Total time 3 hr, 4 min, 19 sec

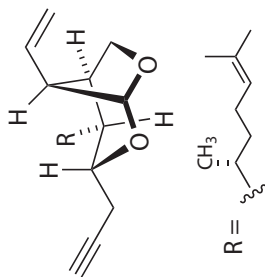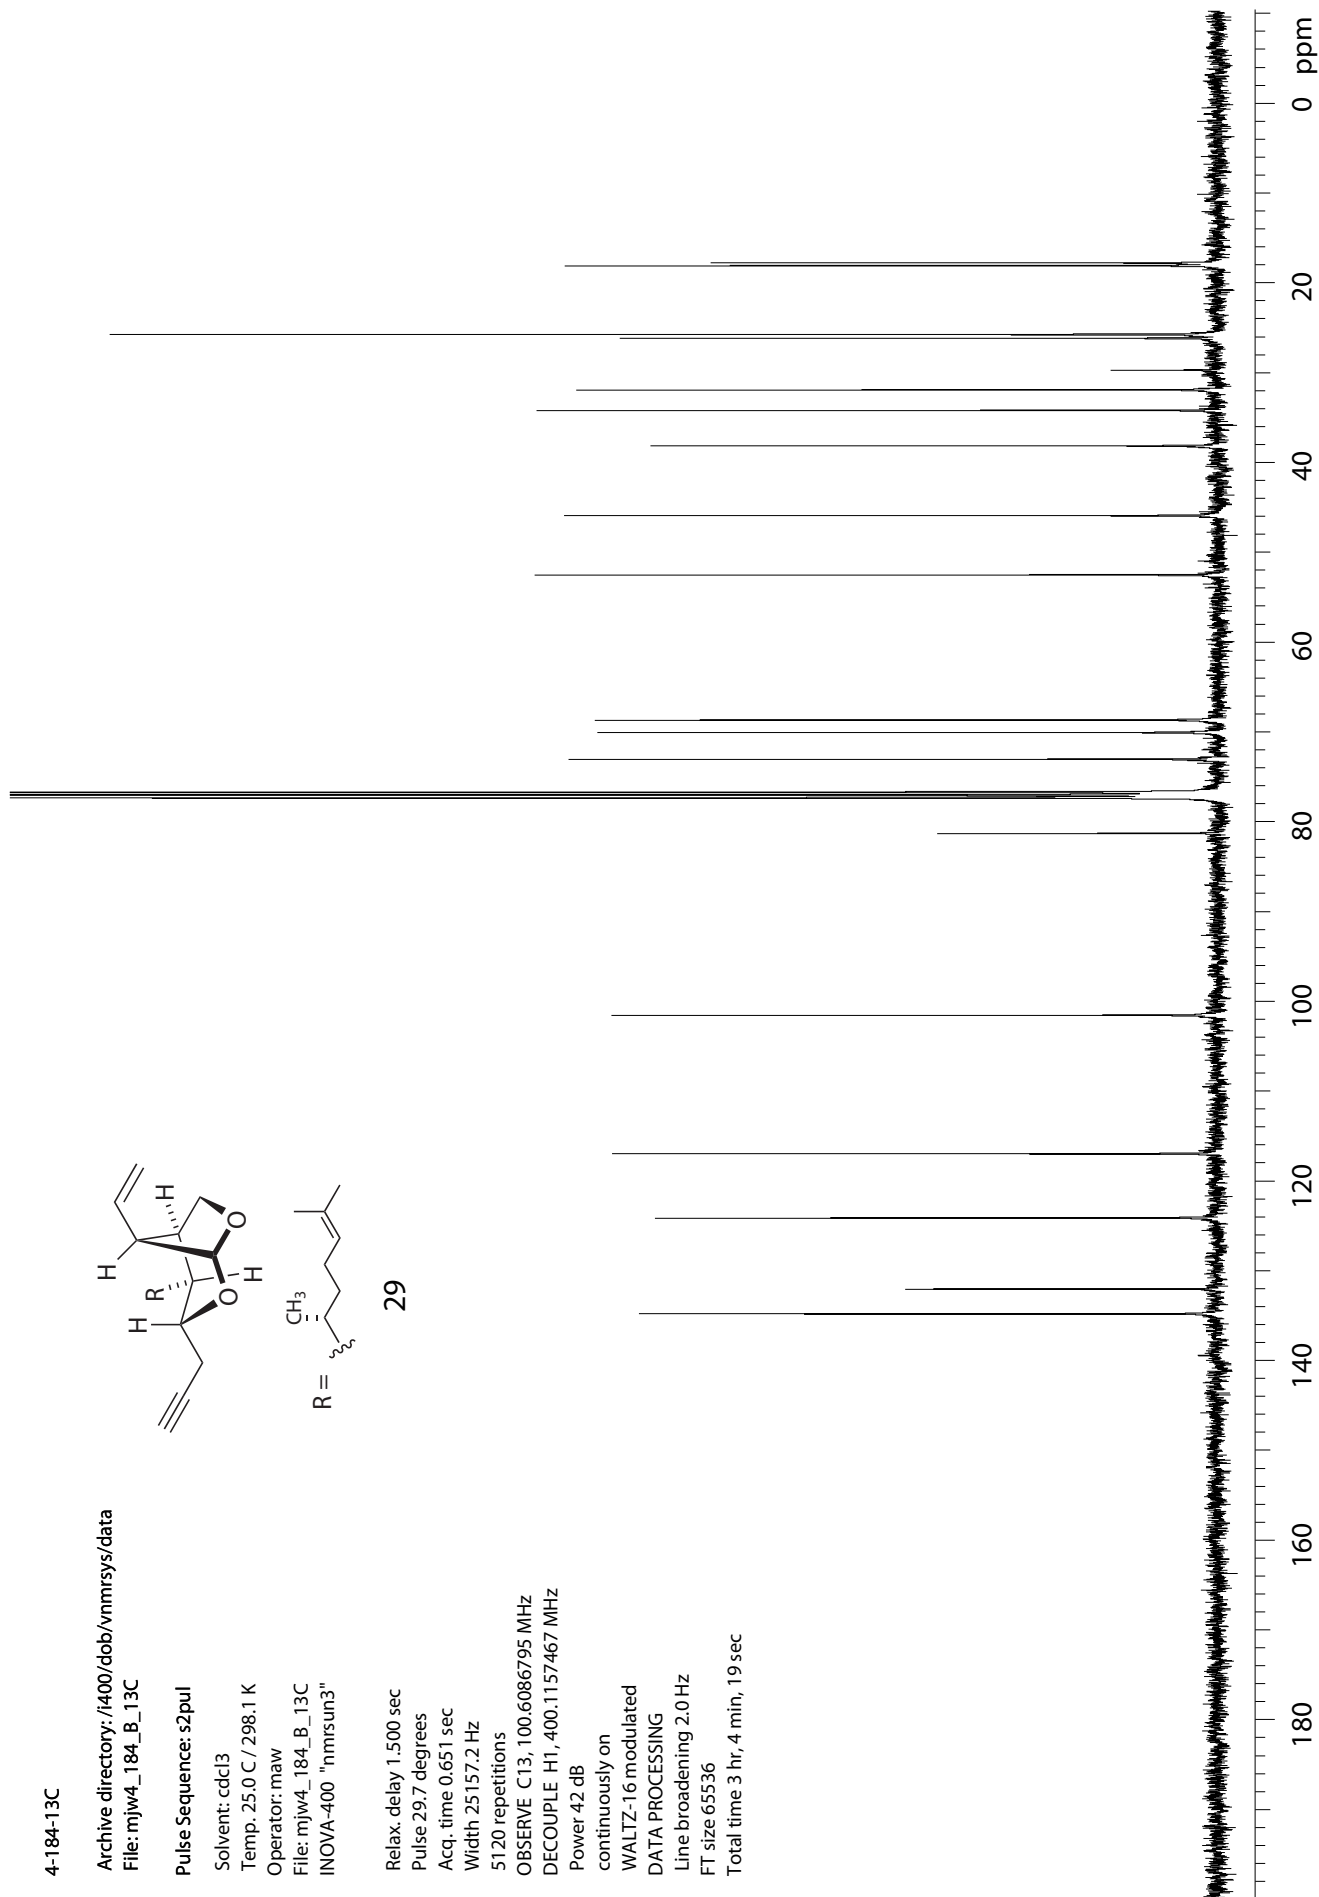

4-240-1H

Archive directory: /i400/dob/vnmrSYS/data  
File:

Pulse Sequence: s2pul

Solvent: cddcl3

Temp. 25.0 C / 298.1 K

Operator: maw

File:

INOVA-400 "nrmrSun3"

Relax. delay 1.000 sec

Pulse 45.0 degrees

Acq. time 2.003 sec

Width 6402.0 Hz

16 repetitions

OBSERVE H1, 400.1137400 MHz

DATA PROCESSING

Line broadening 0.5 Hz

FT size 65536

Total time 0 min, 48 sec

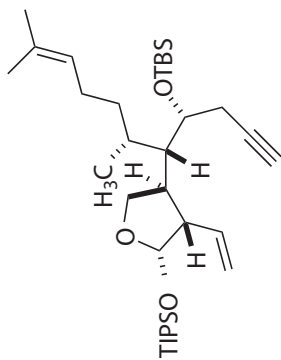

S11

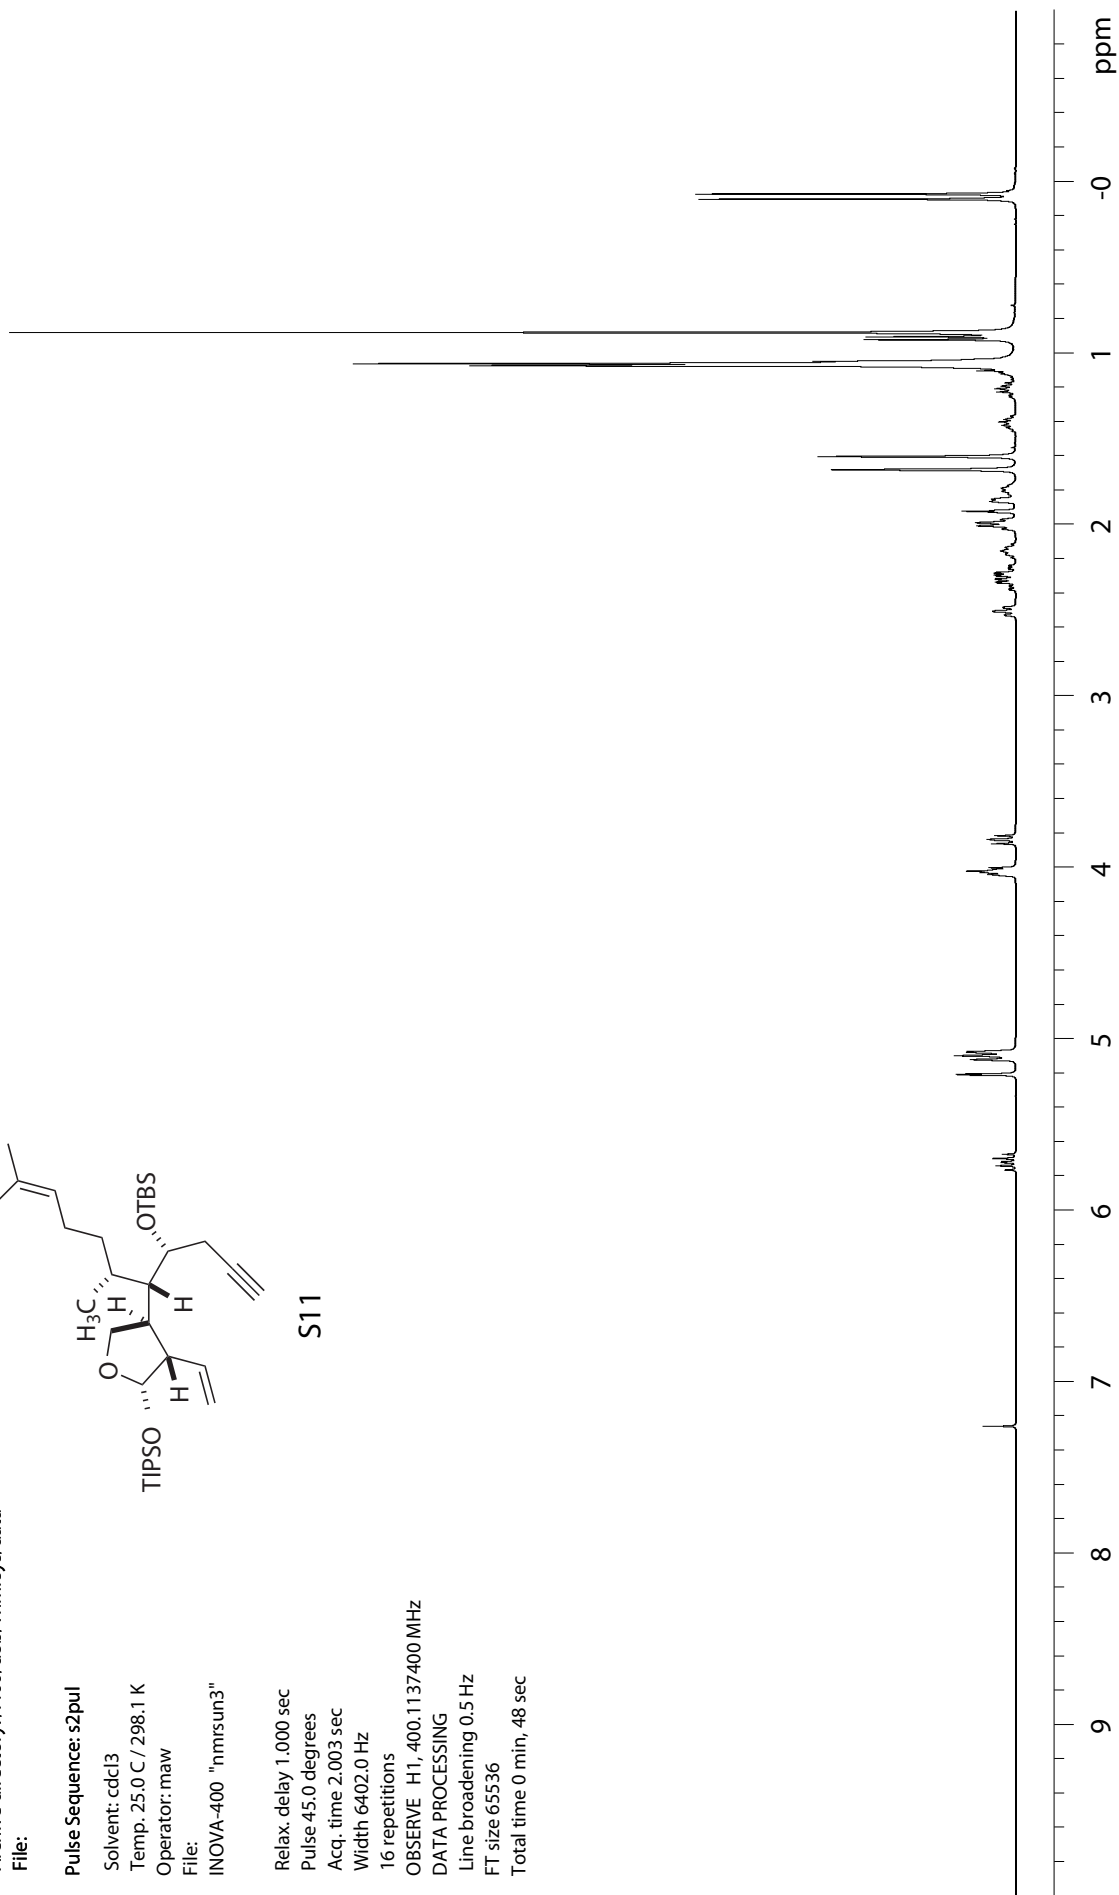

4-240-13C

Archive directory: /i400/dob/vnmrSYS/data  
File:

Pulse Sequence: s2pul

Solvent: cdc13

Temp. 25.0 C / 298.1 K

Operator: maw

File:

INOVA-400 "nrmrSun3"

Relax. delay 1.500 sec

Pulse 29.7 degrees

Acq. time 0.651 sec

Width 25157.2 Hz

512 repetitions

OBSERVE C13, 100.6086795 MHz

DECOUPLE H1, 400.1157467 MHz

Power 42 dB

continuously on

WALTZ-16 modulated

DATA PROCESSING

Line broadening 2.0 Hz

FT size 65536

Total time 18 min, 25 sec

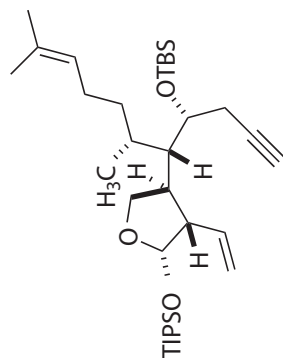

S11

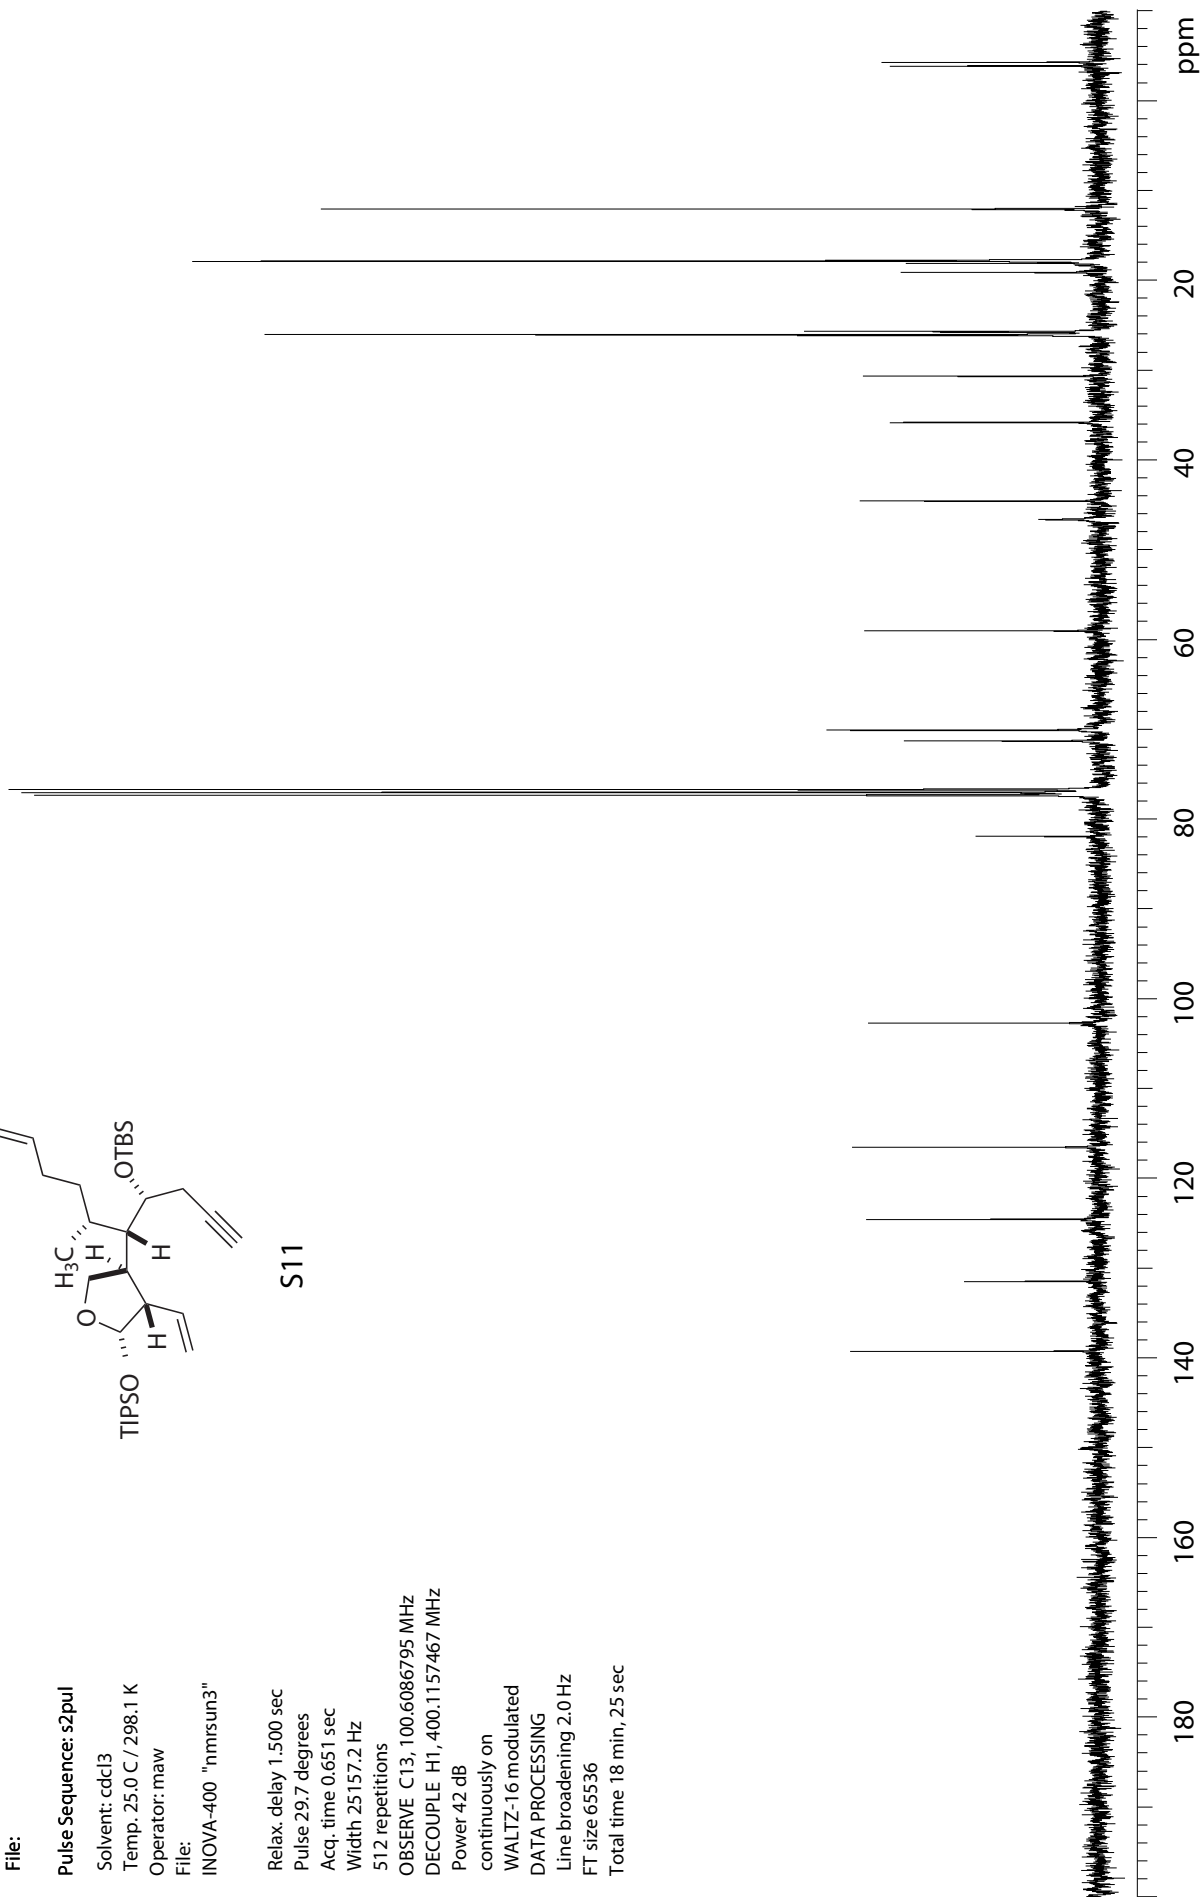

4-284-1H

Archive directory: /vxr400/vnmr1/vnmrsys/data  
File:

Pulse Sequence: s2pul

Solvent: cdcl3

Temp. 25.0 C / 298.1 K

File:

INOVA-400 "nmsun3"

Relax. delay 1.000 sec

Pulse 45.0 degrees

Acq. time 2.730 sec

Width 6000.6 Hz

16 repetitions

OBSERVE H1, 399.7076397 MHz

DATA PROCESSING

Line broadening 0.3 Hz

FT size 65536

Total time 0 min, 59 sec

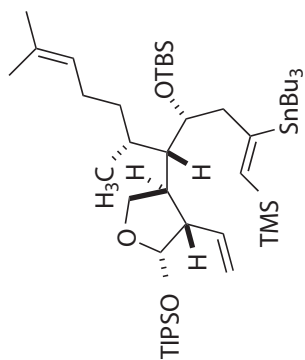

30

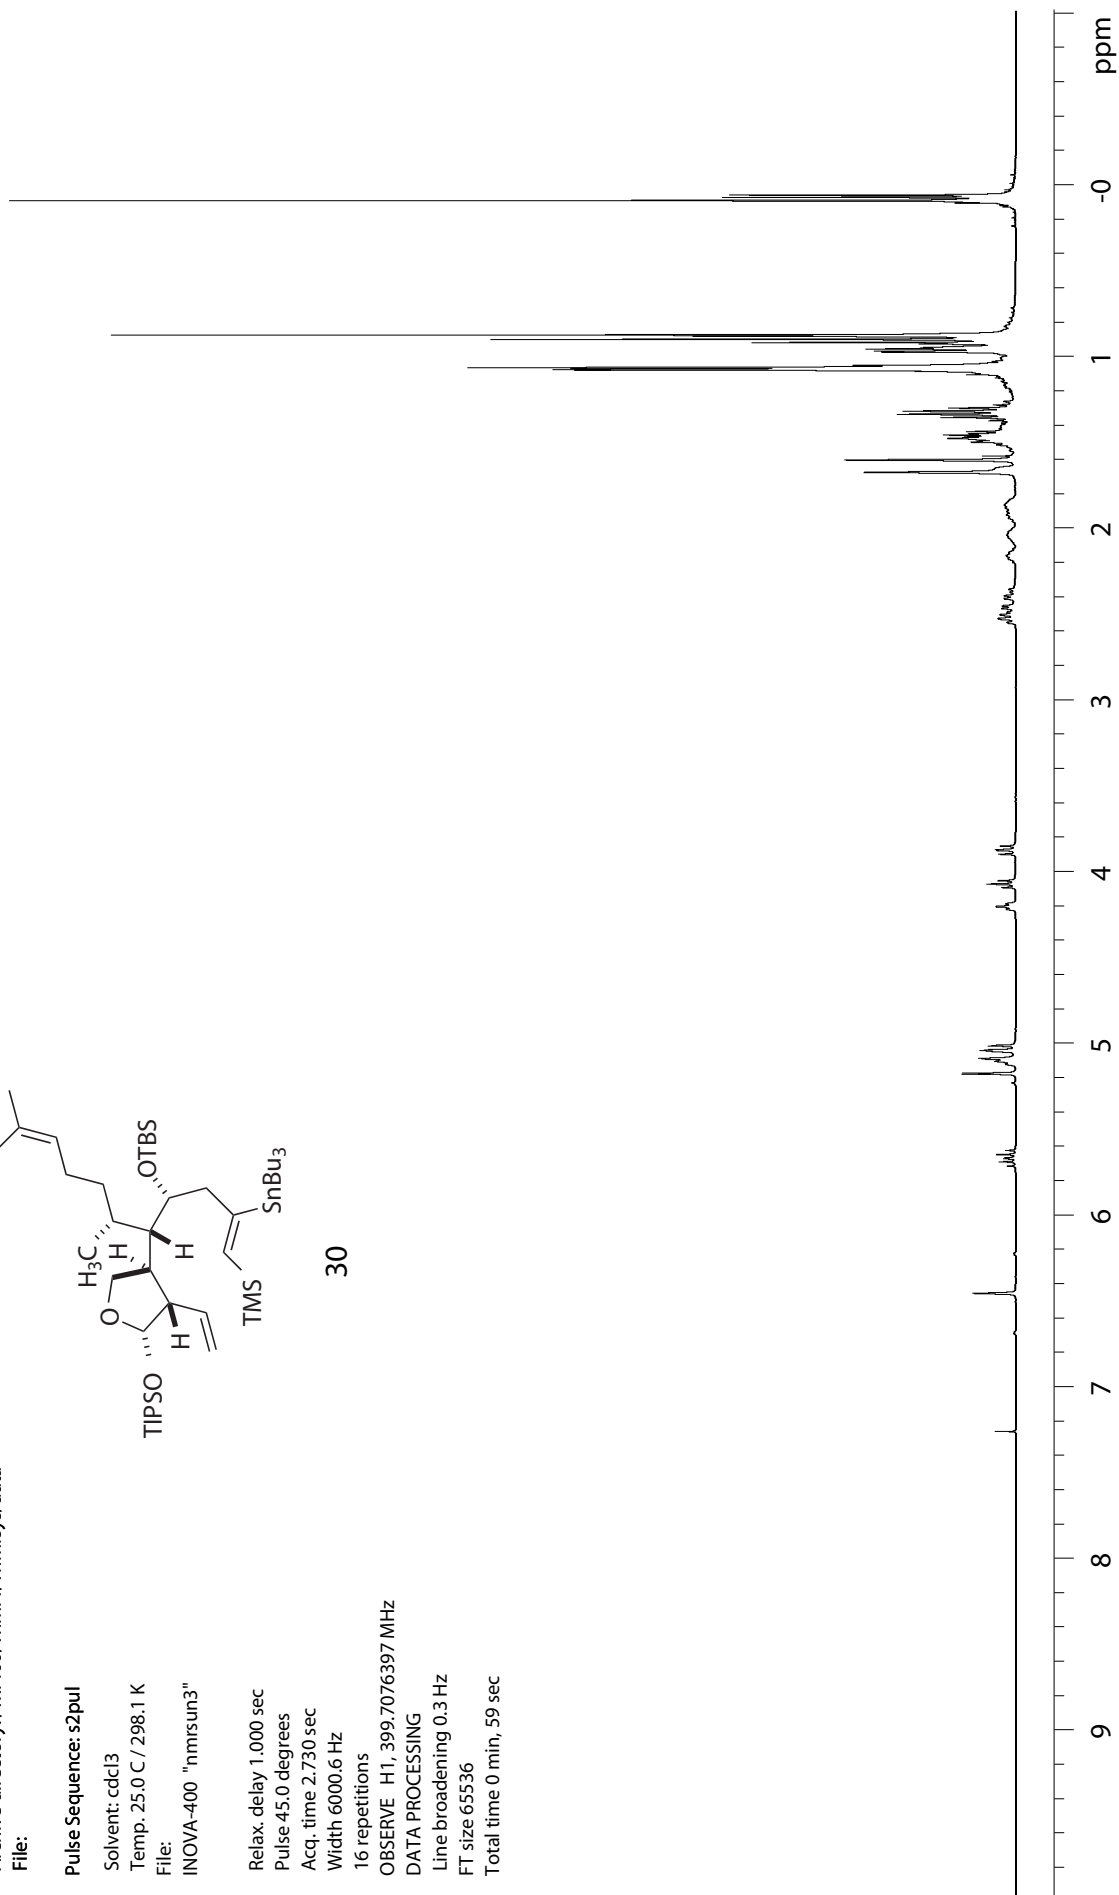

4-284-13C

Archive directory: /vxr400/maw/vnmrsys/data  
File:

Pulse Sequence: s2pul

Solvent: cdc13

Temp. 25.0 C / 298.1 K

File:

INOVA-400 "nmsun3"

Relax. delay 1.500 sec

Pulse 29.6 degrees

Acq. time 0.655 sec

Width 25000.0 Hz

469 repetitions

OBSERVE C13, 100.5065640 MHz

DECOUPLE H1, 399.7096465 MHz

Power 43 dB

continuously on

WALTZ-16 modulated

DATA PROCESSING

Line broadening 1.0 Hz

FT size 65536

Total time 18 min, 28 sec

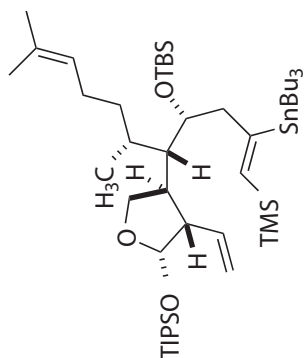

30

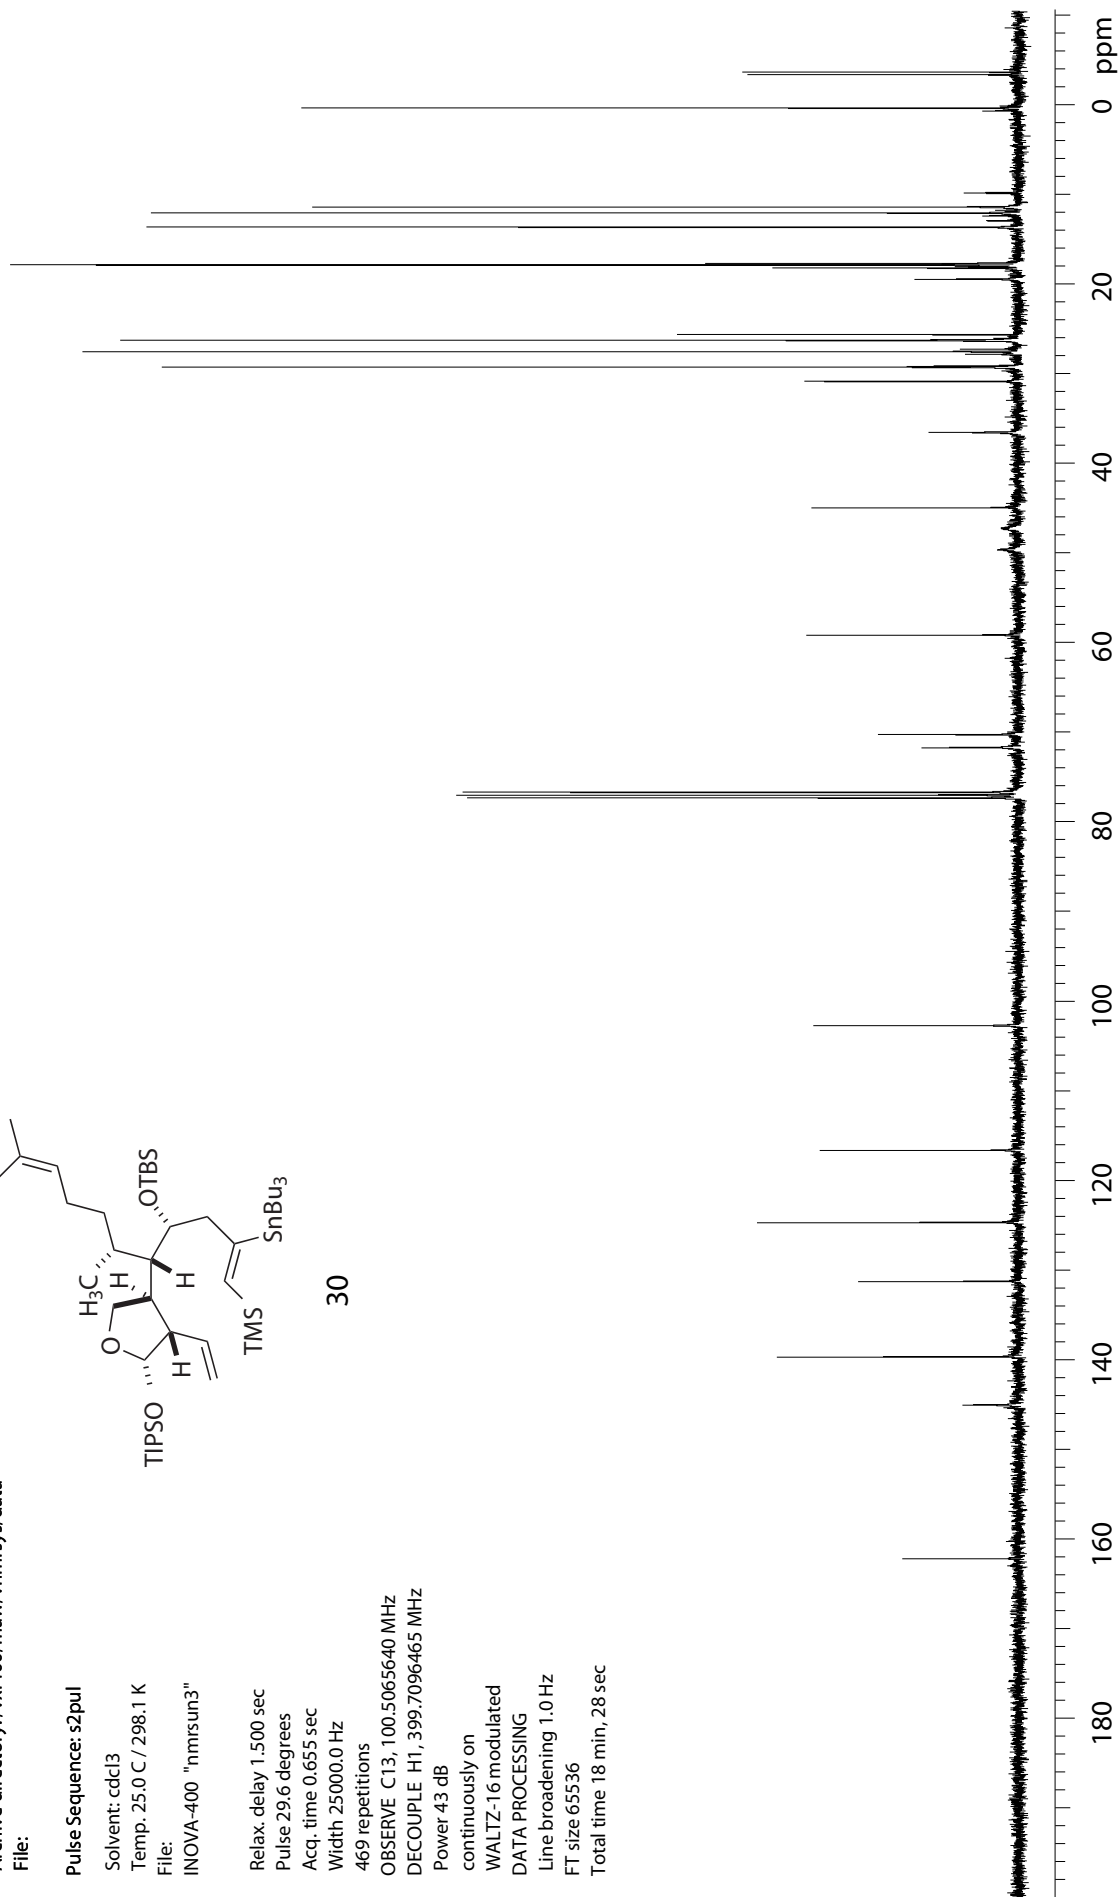

4-239-1H

File: mjaw4\_239\_1H\_p

Pulse Sequence: s2pul

Solvent: cddcl3

Temp. 25.0 C / 298.1 K

Operator: maw

File: mjaw4\_239\_1H\_p

INOVA-400 "nmsun3"

Relax. delay 1.000 sec

Pulse 45.0 degrees

Acq. time 2.049 sec

Width 7996.8 Hz

16 repetitions

OBSERVE H1, 499.8045942 MHz

DATA PROCESSING

Line broadening 0.2 Hz

FT size 65536

Total time 0 min, 55 sec

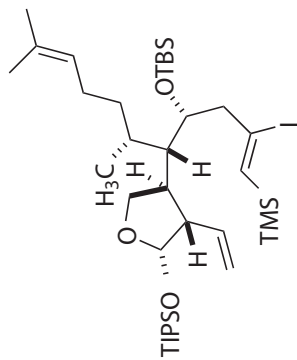

S12

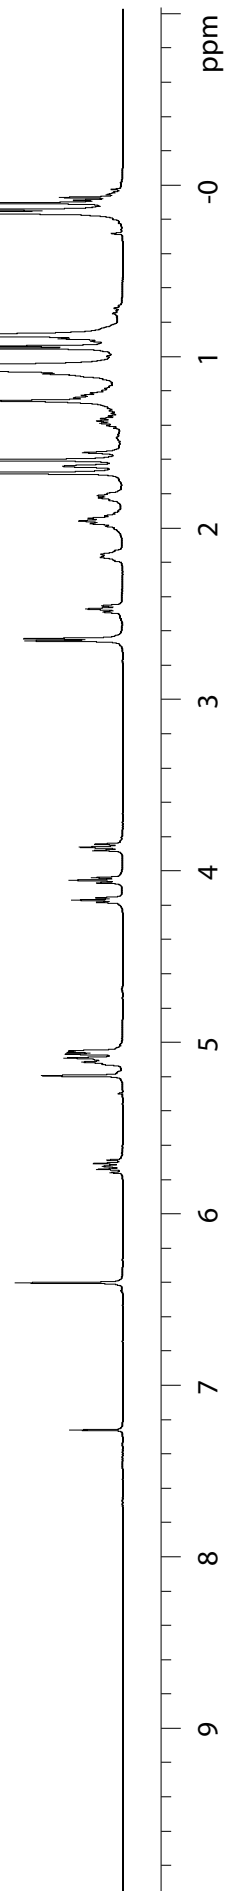

4-285-13C

Archive directory: /i400/dob/vnmrSYS/data  
File: mjlw4\_285\_13C\_p

Pulse Sequence: s2pul

Solvent: cdc13  
Temp. 25.0 C / 298.1 K  
Operator: maw  
File: mjlw4\_285\_13C\_p  
INOVA-400 "nmrSun3"

Relax. delay 1.500 sec  
Pulse 29.7 degrees  
Acq. time 0.651 sec  
Width 25157.2 Hz  
256 repetitions  
OBSERVE C13, 100.6086795 MHz  
DECOUPLE H1, 400.1157467 MHz  
Power 42 dB  
continuously on  
WALTZ-16 modulated  
DATA PROCESSING  
Line broadening 2.0 Hz  
FT size 65536  
Total time 9 min, 12 sec

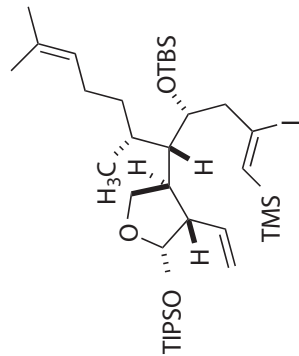

S12

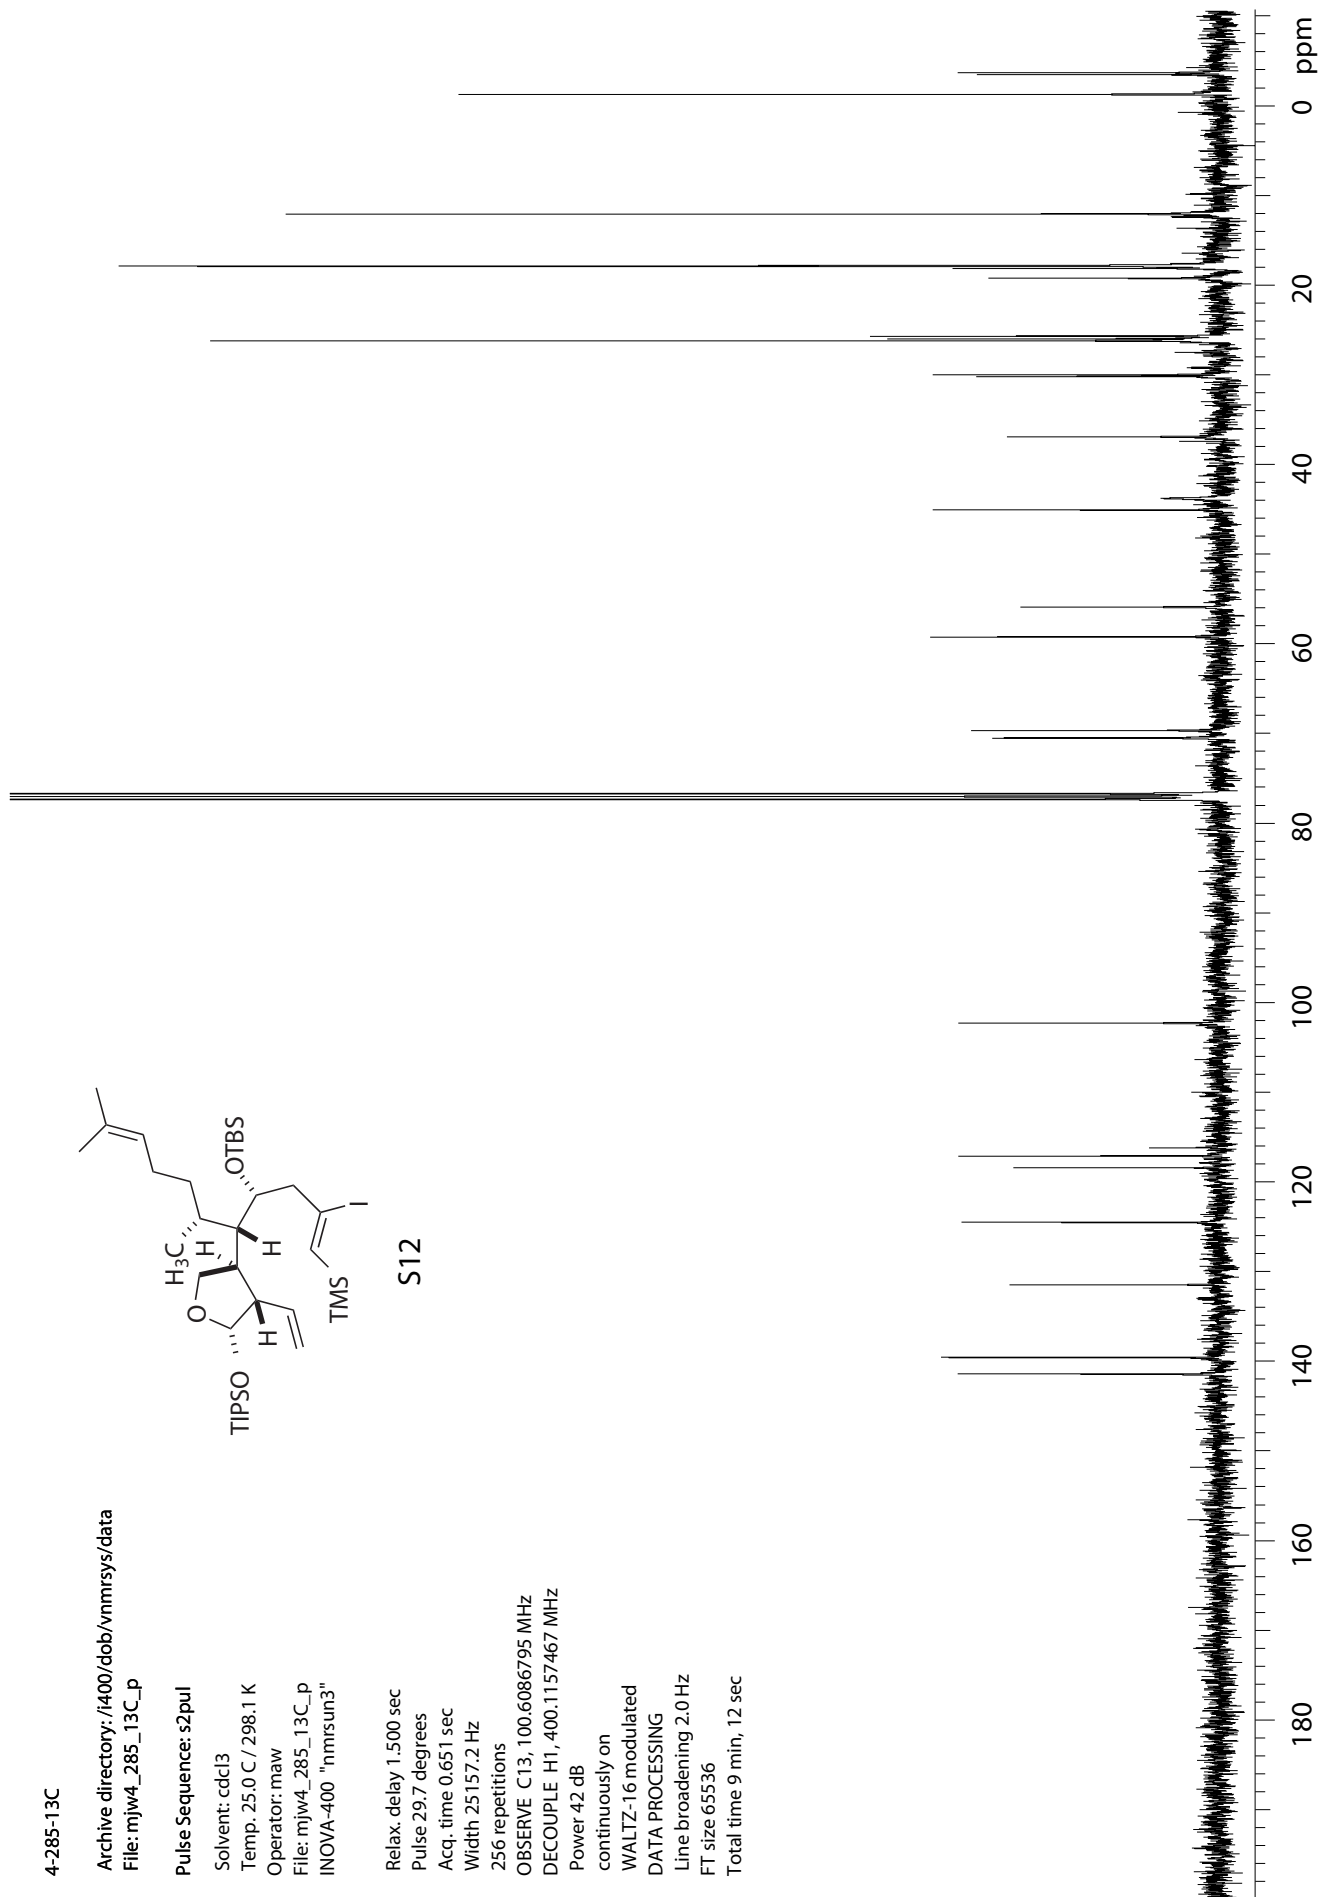

4-238-1H

Archive directory: /i400/dob/vnmrSYS/data  
File:

Pulse Sequence: s2pul

Solvent: cdc13

Temp. 25.0 C / 298.1 K

Operator: maw

File:

INOVA-400 "nrmrSun3"

Relax. delay 1.000 sec

Pulse 45.0 degrees

Acq. time 2.003 sec

Width 6402.0 Hz

16 repetitions

OBSERVE H1, 400.1137400 MHz

DATA PROCESSING

Line broadening 0.5 Hz

FT size 65536

Total time 0 min, 48 sec

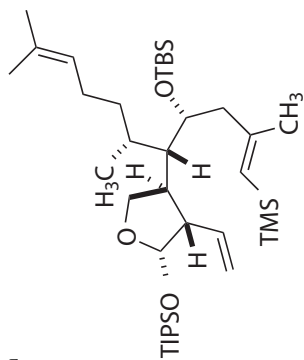

S13

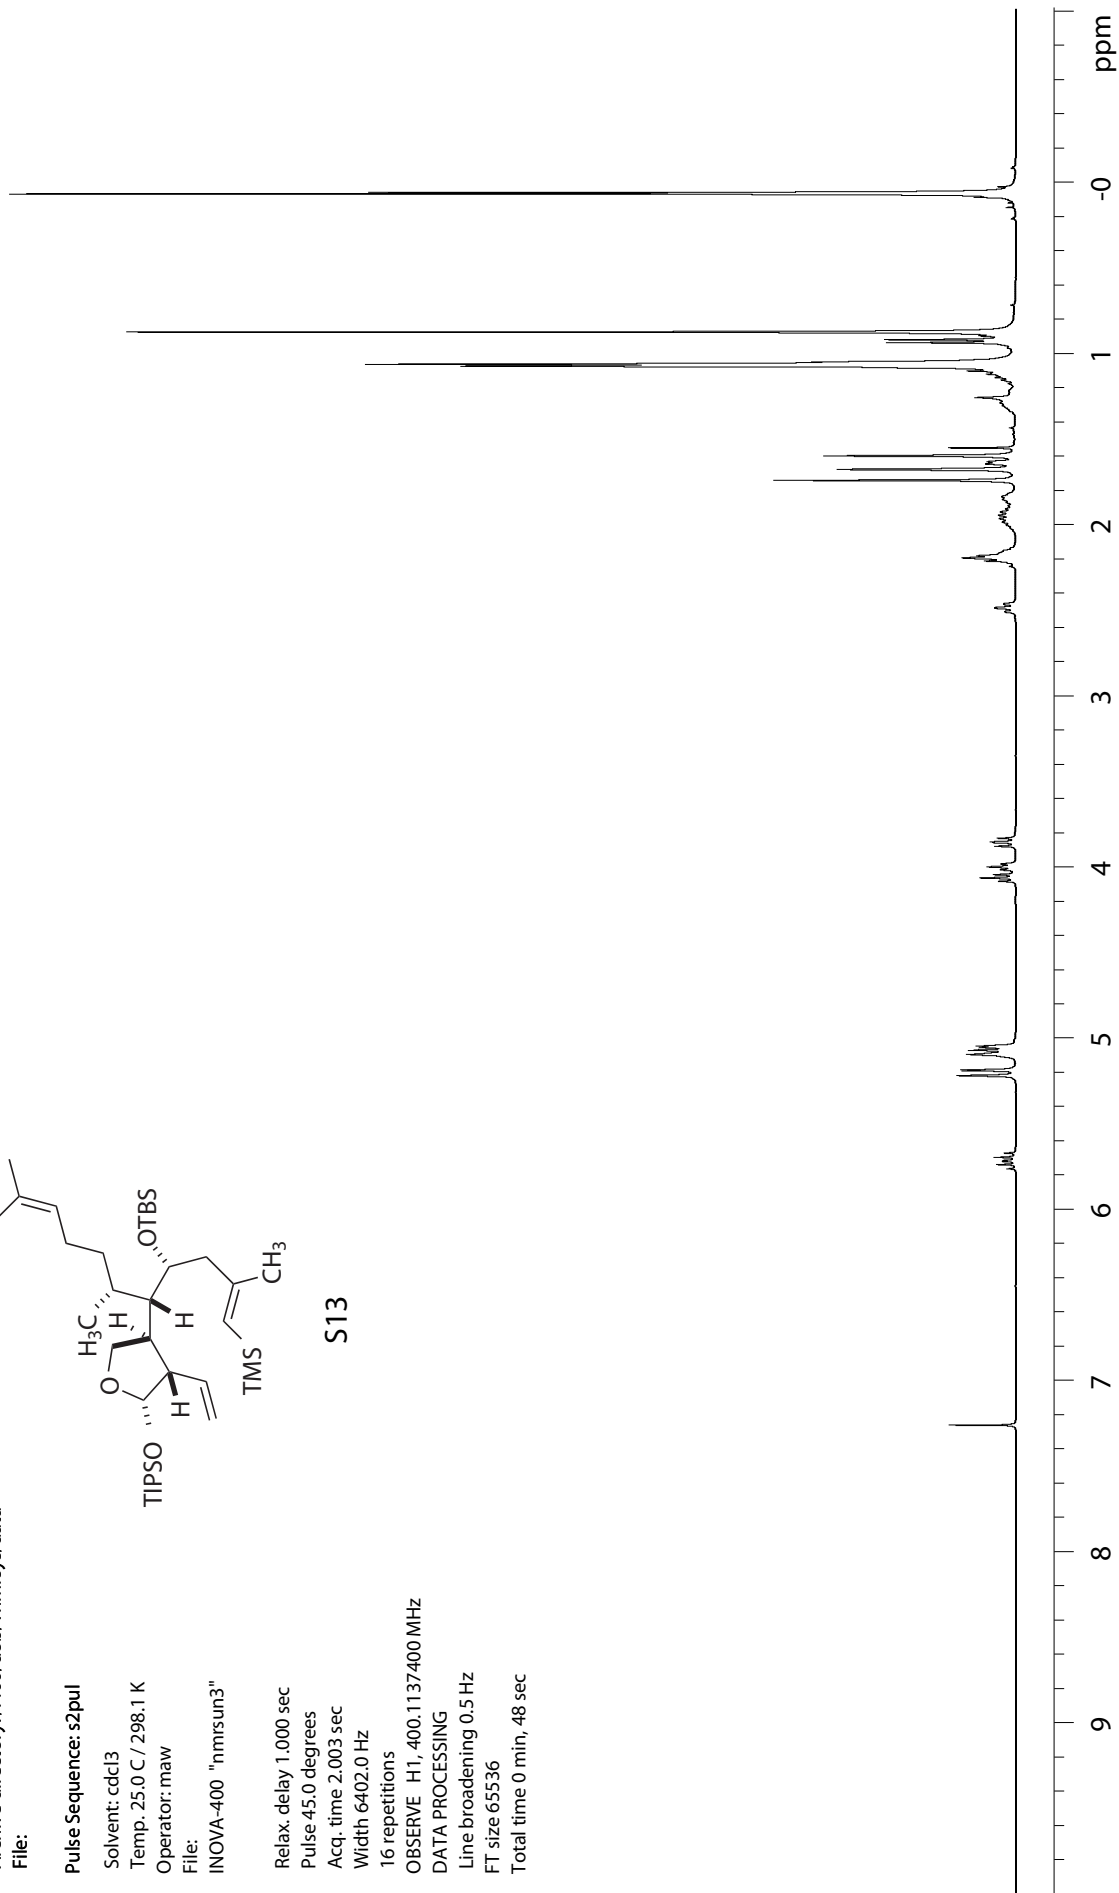



4-238-13C

Archive directory: /i400/dob/vnmrSYS/data  
File:

Pulse Sequence: s2pul

Solvent: cdcl3

Temp. 25.0 C / 298.1 K

Operator: maw

File:

INOVA-400 "nmrSun3"

Relax. delay 1.500 sec

Pulse 29.7 degrees

Acq. time 0.651 sec

Width 25157.2 Hz

1024 repetitions

OBSERVE C13, 100.6082852 MHz

DECOUPLE H1, 400.1157467 MHz

Power 42 dB

continuously on

WALTZ-16 modulated

DATA PROCESSING

Line broadening 2.0 Hz

FT size 65536

Total time 36 min, 51 sec

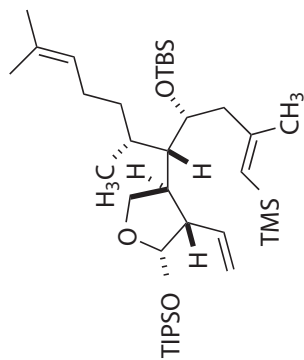

S13

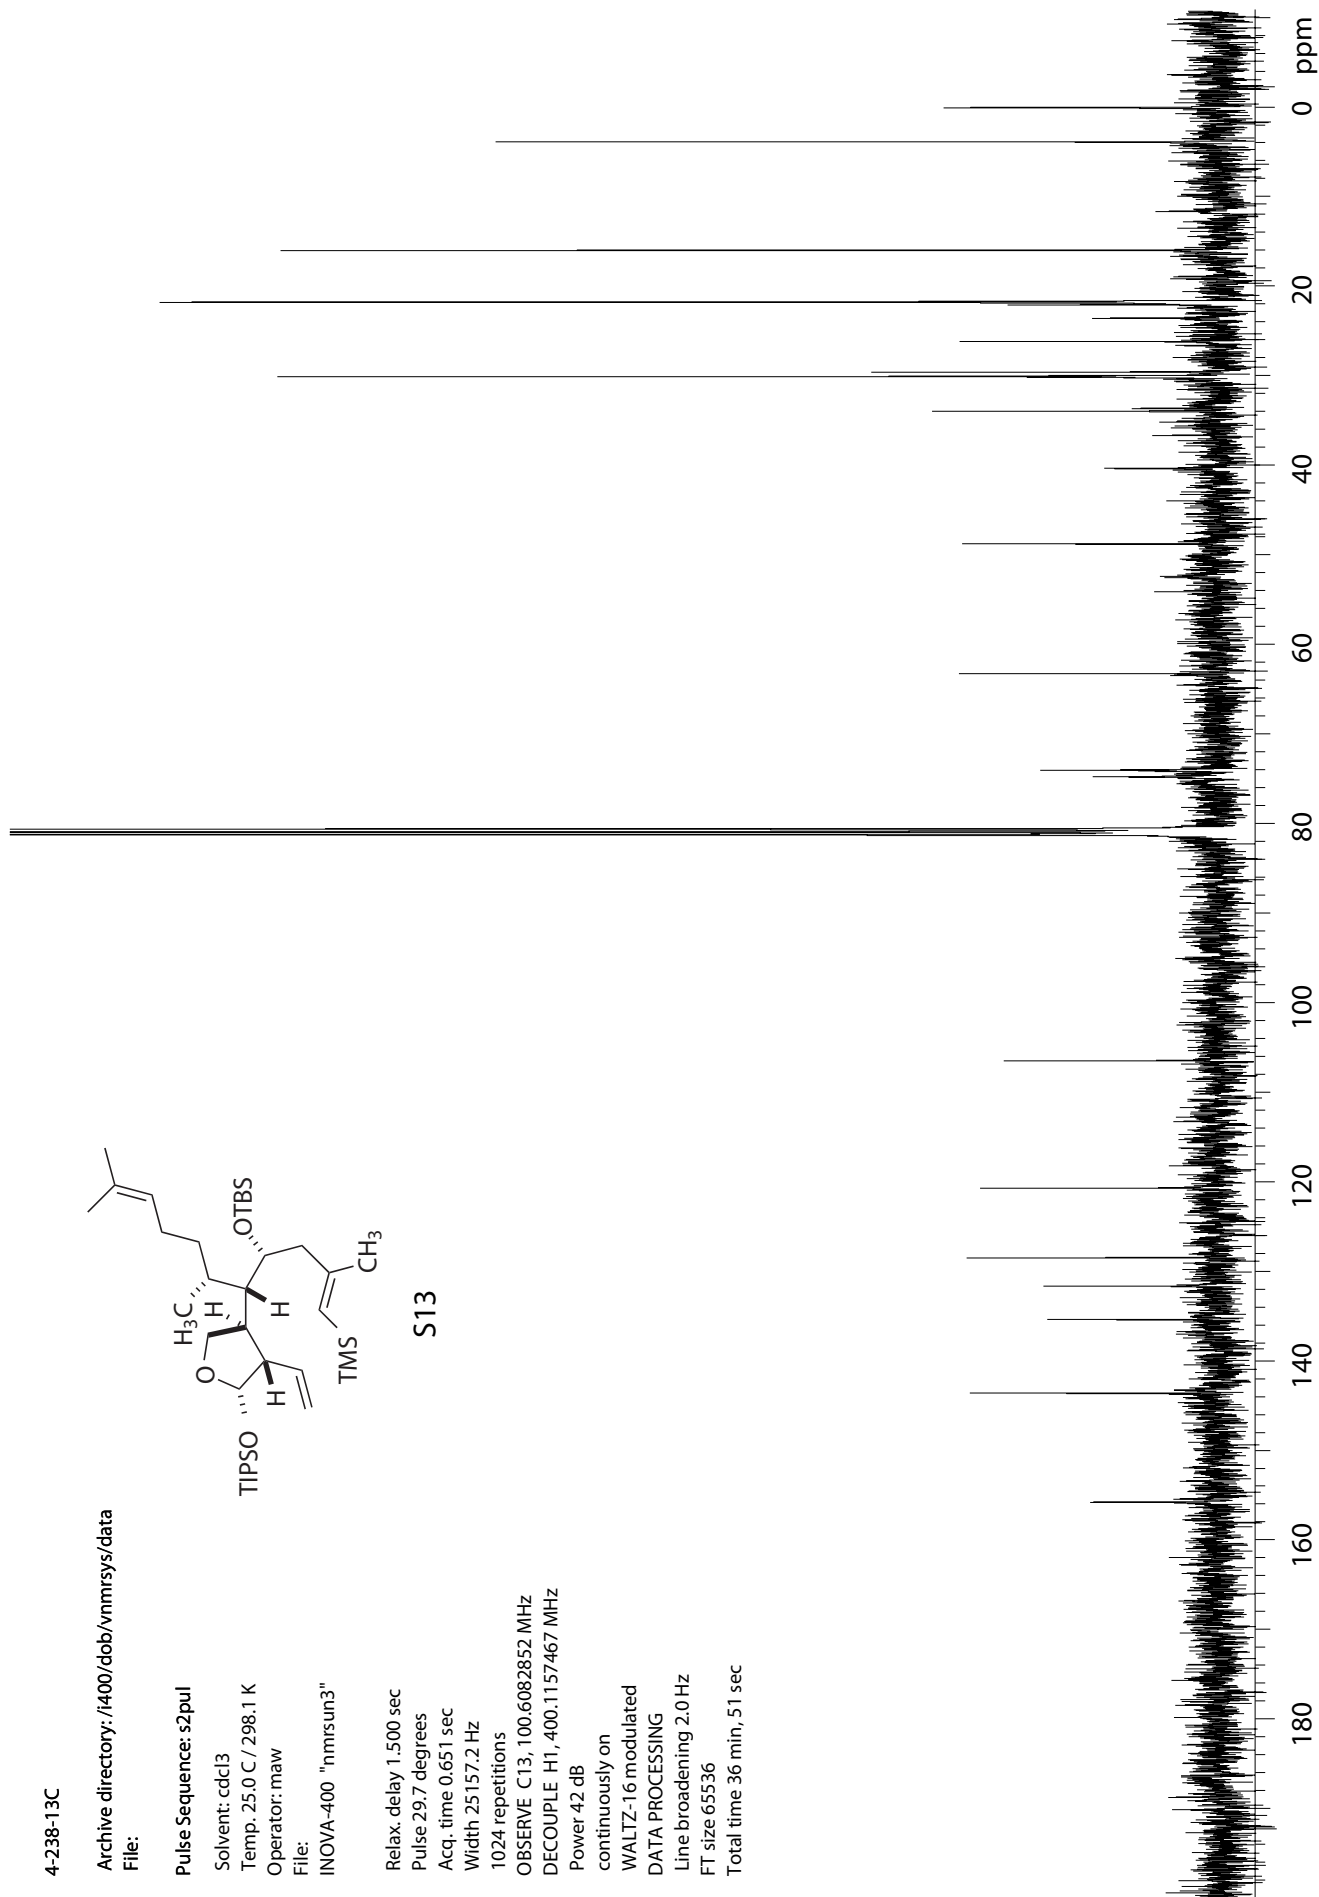

5-24-1H

Archive directory: /vxr400/vnmr1/vnmrsys/data  
File:

Pulse Sequence: s2pul

Solvent: ccdcl3

Temp. 25.0 C / 298.1 K

File:  
INOVA-400 "nmsun3"

Relax. delay 1.000 sec

Pulse 45.0 degrees

Acq. time 2.730 sec

Width 6000.6 Hz

16 repetitions

OBSERVE H1, 399.7076397 MHz

DATA PROCESSING

Line broadening 0.3 Hz

FT size 65536

Total time 0 min, 59 sec

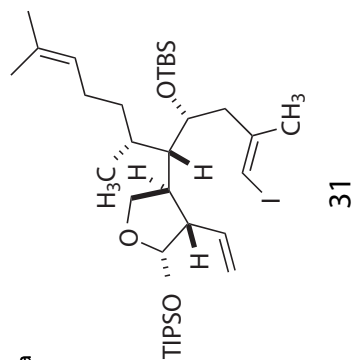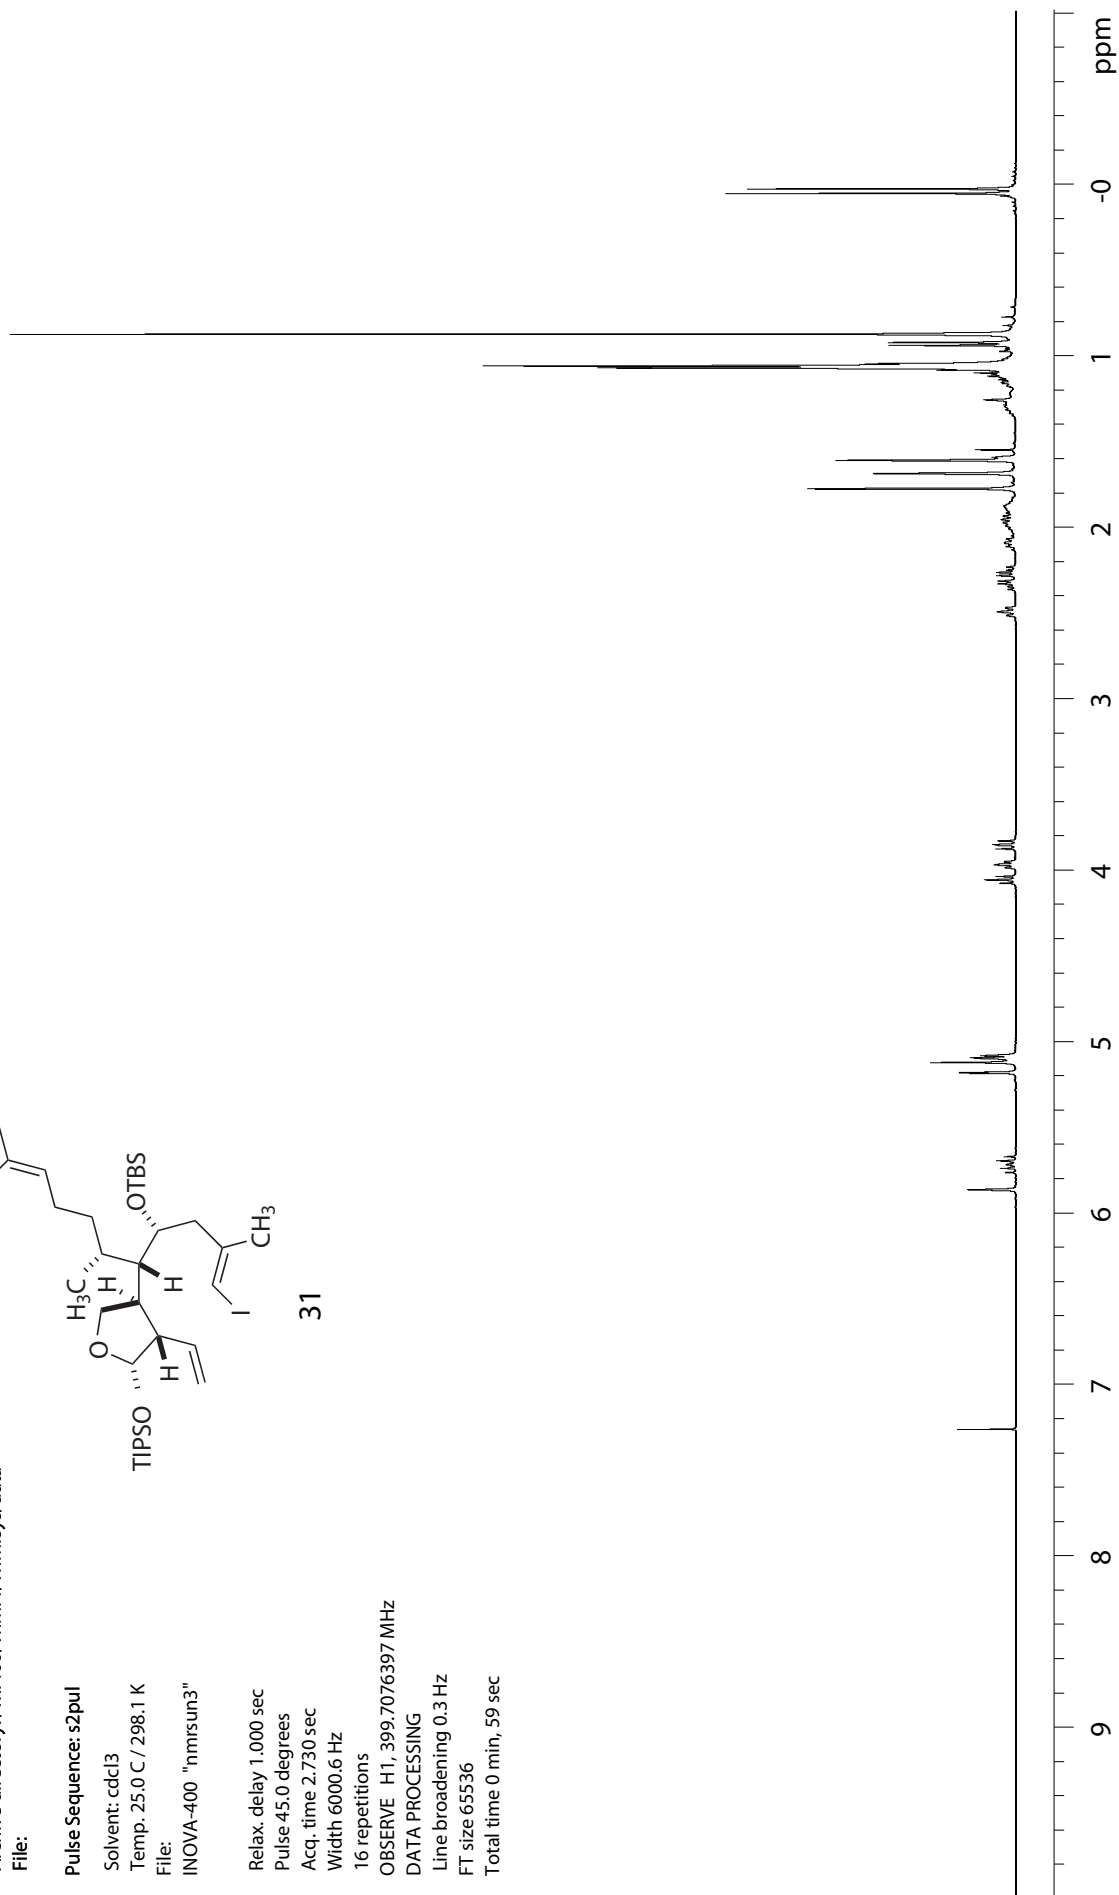

4-278-13C

Archive directory: /vxr400/maw/vnmrsys/data  
File:

Pulse Sequence: s2pul

Solvent: cdc13

Temp. 25.0 C / 298.1 K

File:

INOVA-400 "nmsun3"

Relax. delay 1.500 sec

Pulse 29.6 degrees

Acq. time 0.655 sec

Width 25000.0 Hz

393 repetitions

OBSERVE C13, 100.5065655 MHz

DECOUPLE H1, 399.7096465 MHz

Power 43 dB

continuously on

WALTZ-16 modulated

DATA PROCESSING

Line broadening 1.0 Hz

FT size 65536

Total time 36 min, 56 sec

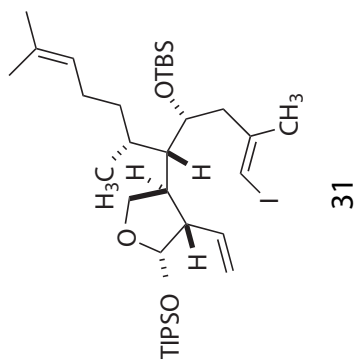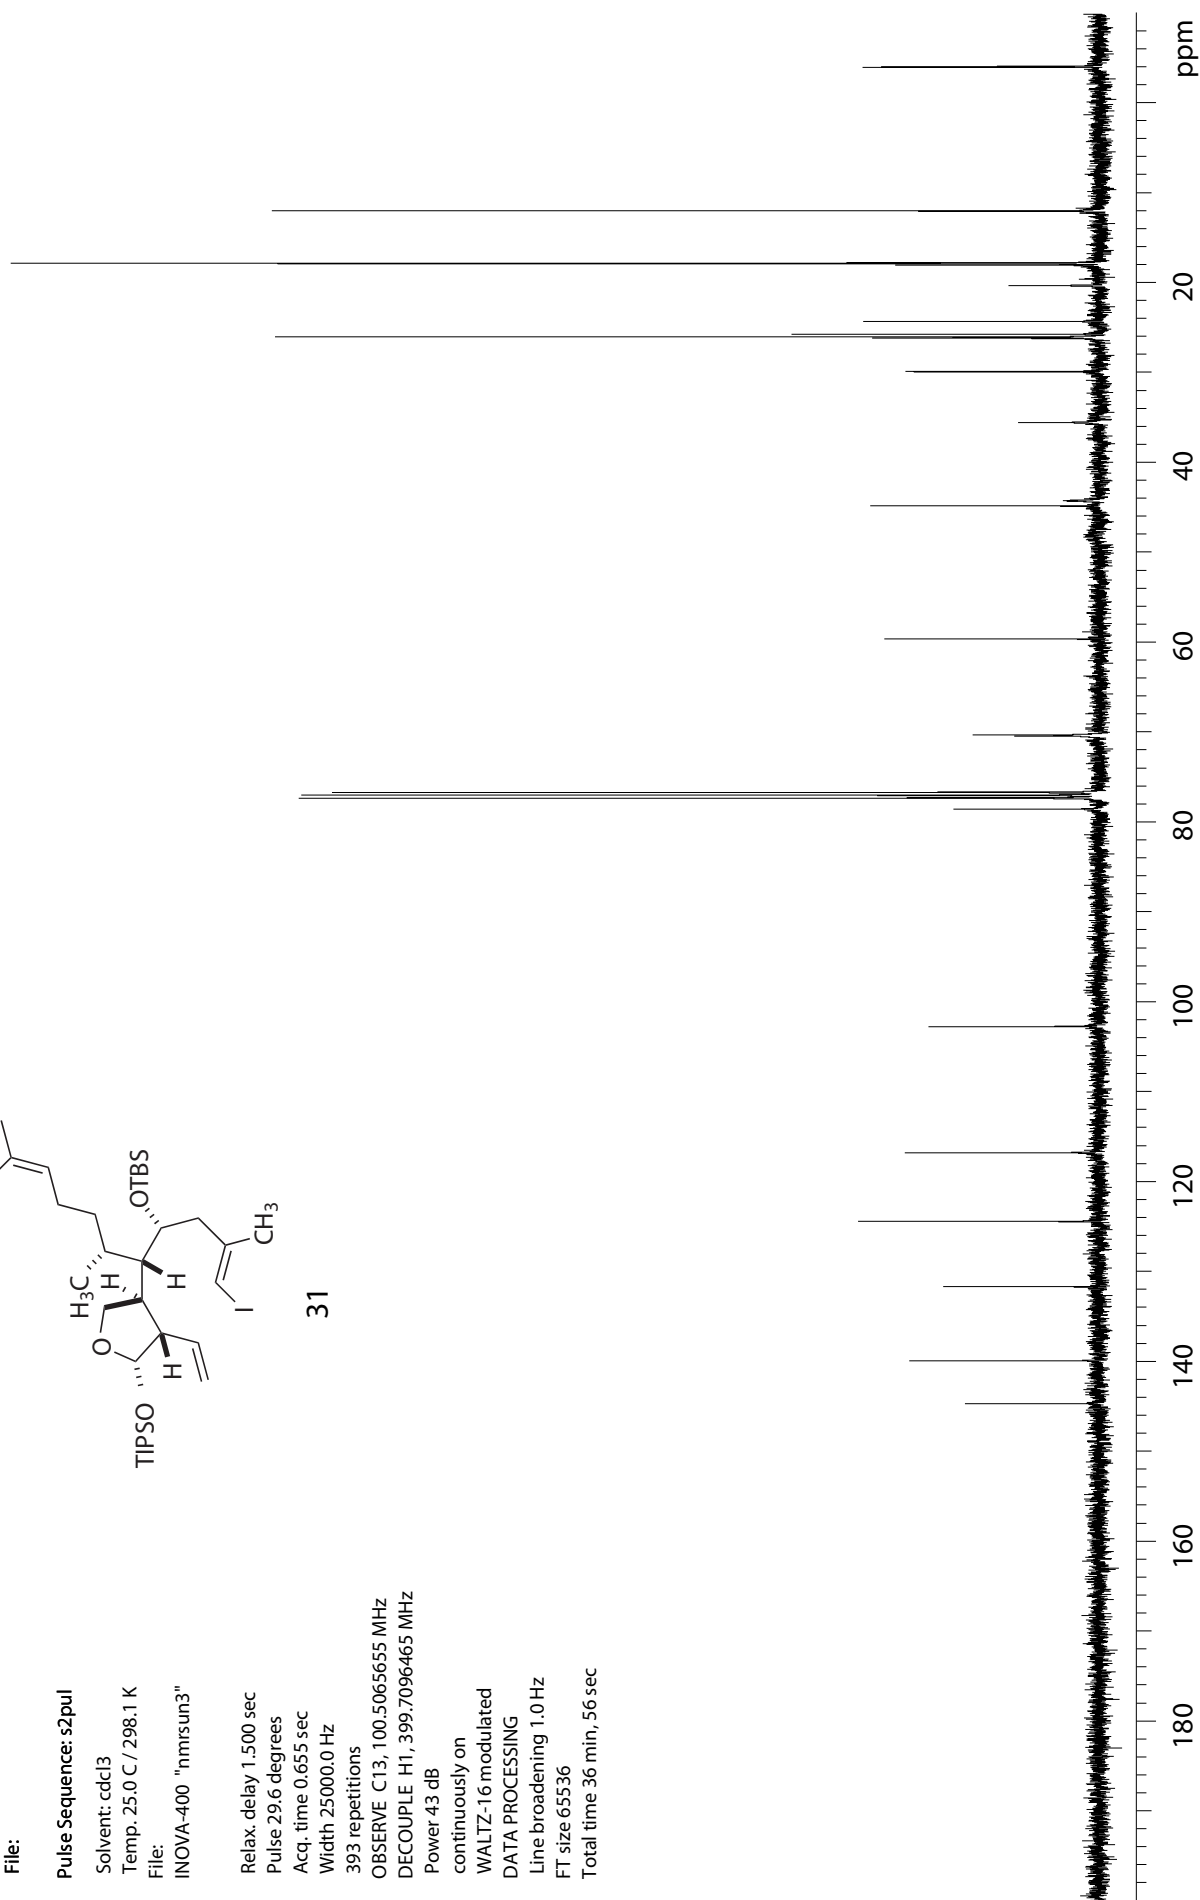

5-163-1H

Archive directory: /vxr400/vnmr1/vnmrsys/data  
File:

Pulse Sequence: s2pul

Solvent: cdc13

Temp. 25.0 C / 298.1 K

Operator: maw

File:

INOVA-400 "nrmisun3"

Relax. delay 1.000 sec

Pulse 45.0 degrees

Acq. time 2.730 sec

Width 6000.6 Hz

16 repetitions

OBSERVE H1, 400.1085059 MHz

DATA PROCESSING

Line broadening 0.3 Hz

FT size 65536

Total time 0 min, 59 sec

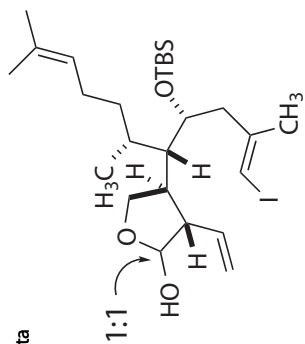

S18

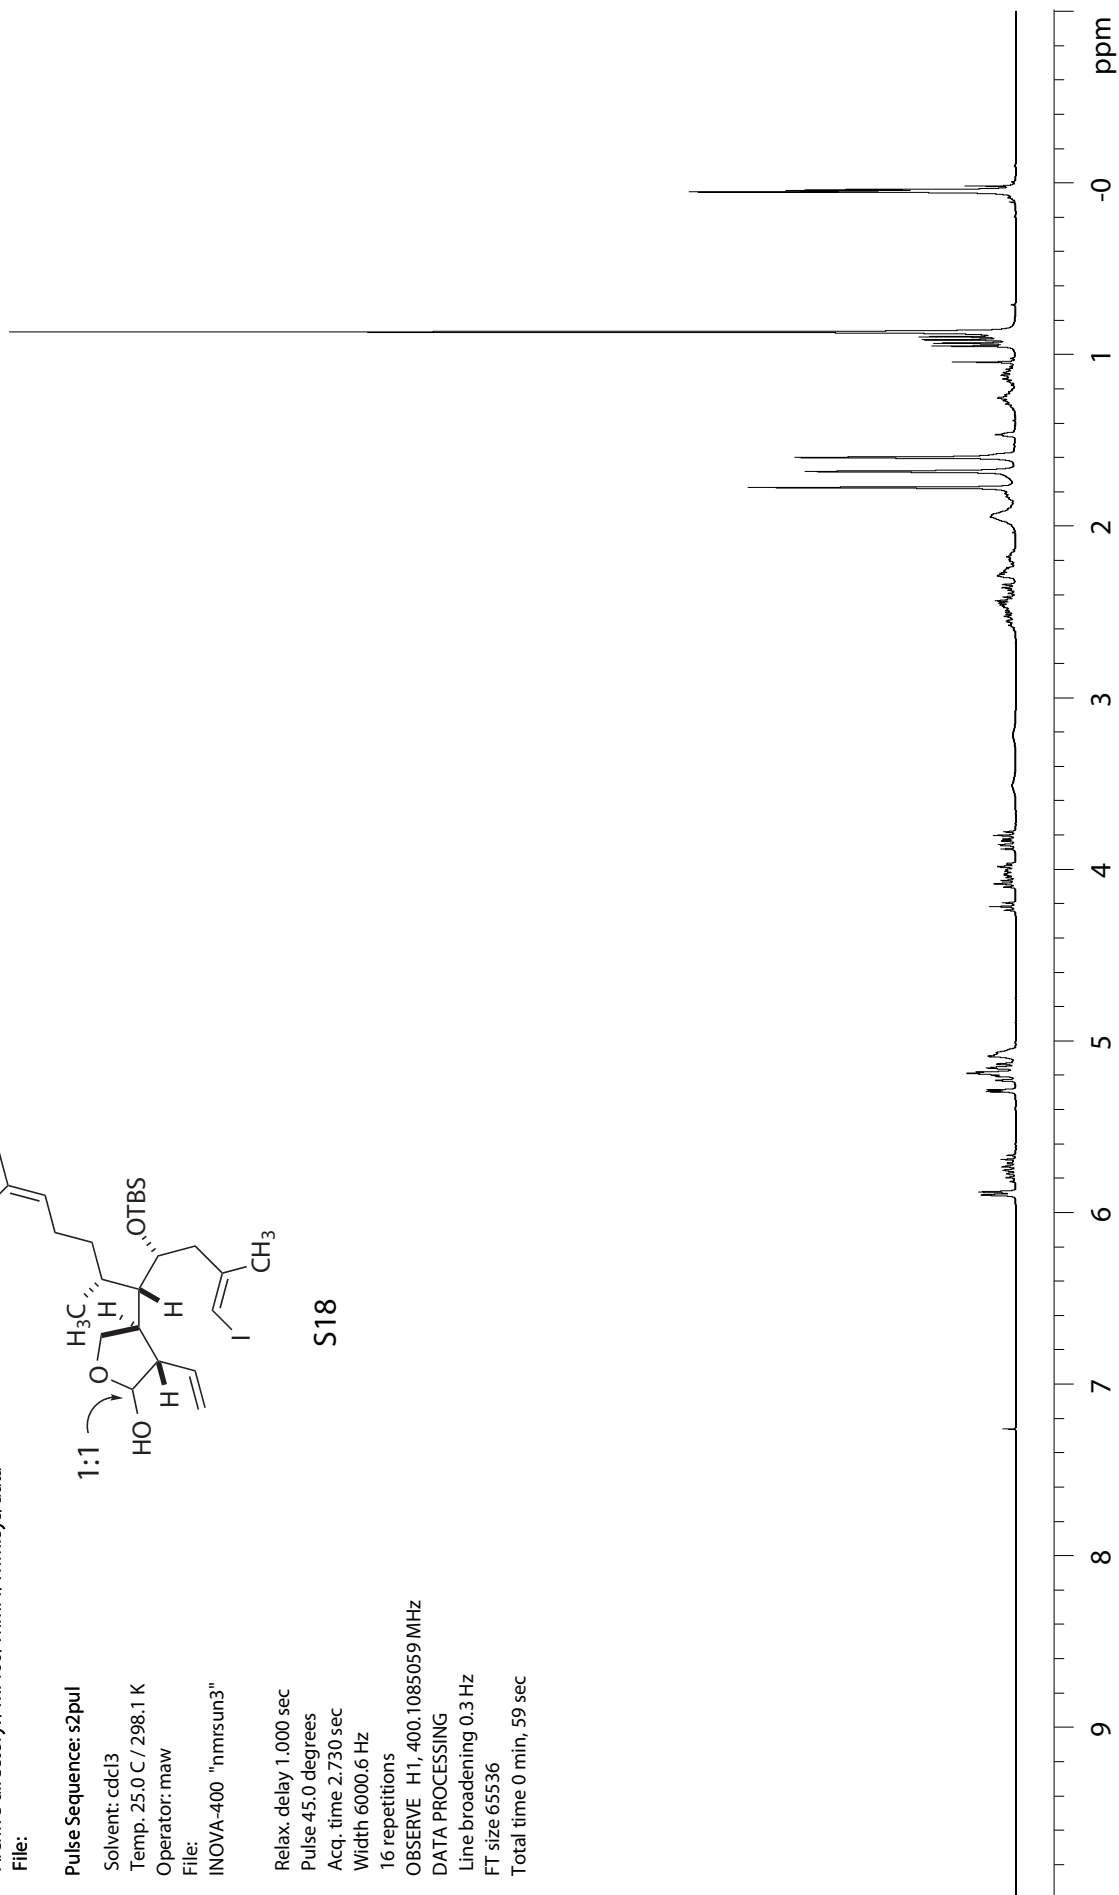

5-163-13C

Archive directory: /i400/dob/vnmrSYS/data  
File:

Pulse Sequence: s2pul

Solvent: cdc13

Temp. 25.0 C / 298.1 K

Operator: maw

File:

INOVA-400 "nrmrSun3"

Relax. delay 1.500 sec

Pulse 29.7 degrees

Acq. time 0.651 sec

Width 25157.2 Hz

274 repetitions

OBSERVE C13, 100.6073671 MHz

DECOUPLE H1, 400.1105092 MHz

Power 43 dB

continuously on

WALTZ-16 modulated

DATA PROCESSING

Line broadening 2.0 Hz

FT size 65536

Total time 18 min, 25 sec

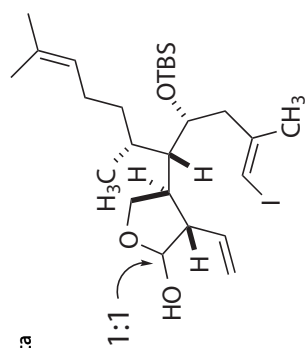

S18

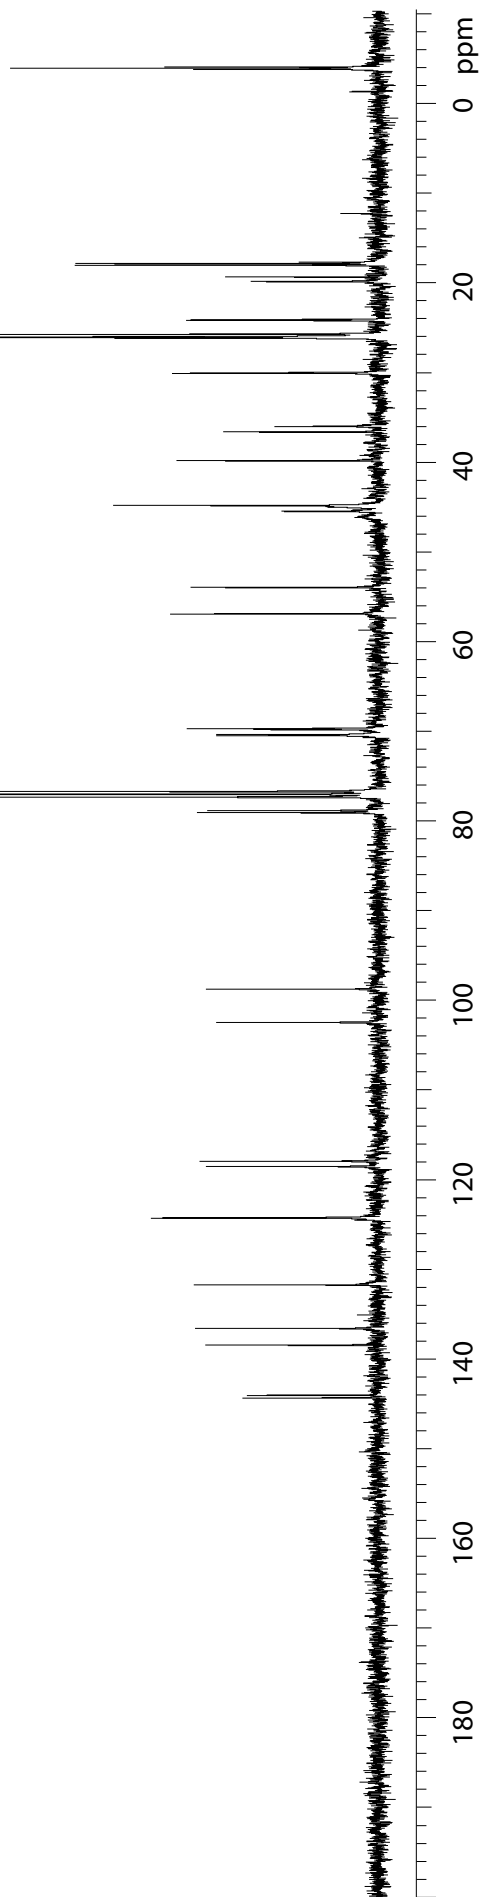



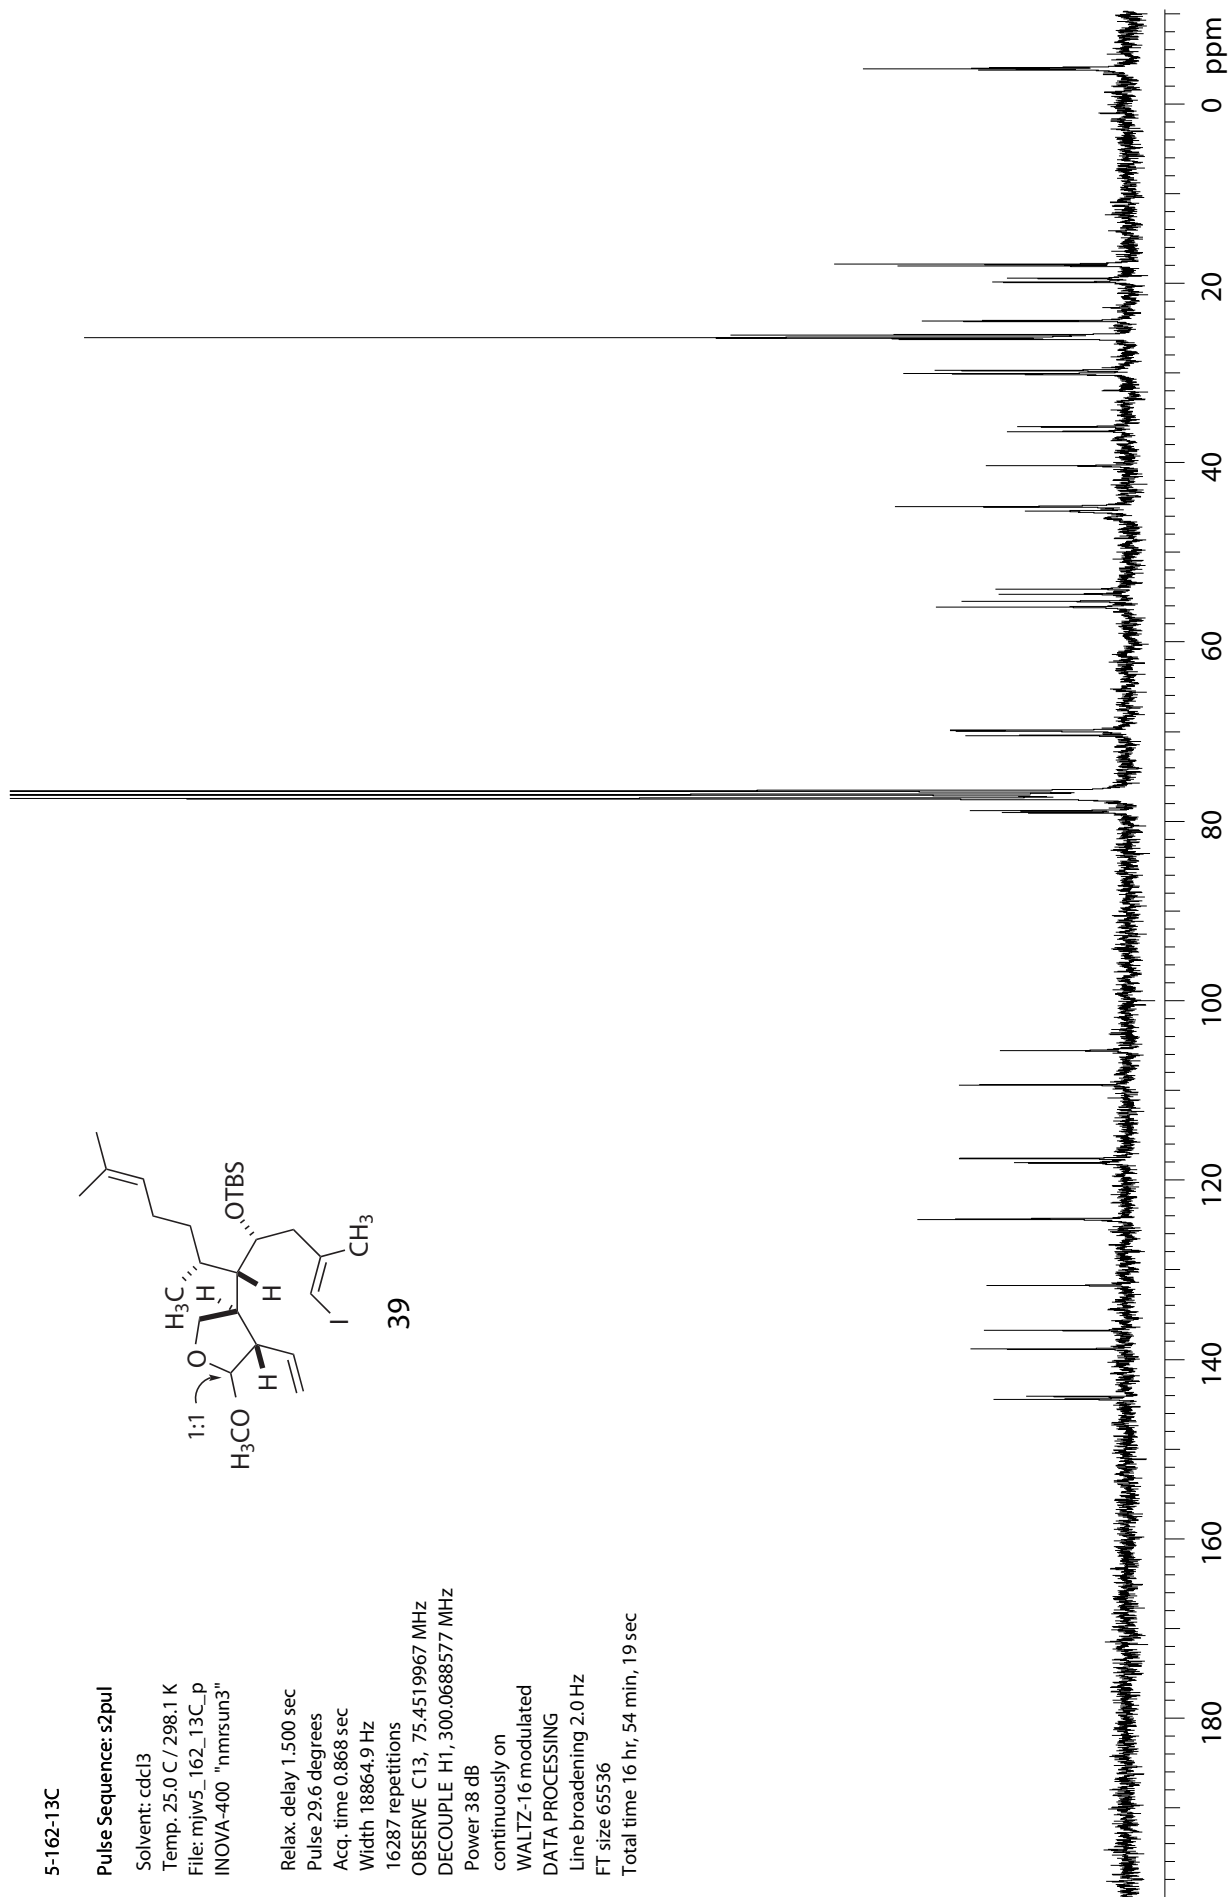

6-17-1H

Archive directory: /vxr400/vnmr1/vnmr1sys/data

File:

Pulse Sequence: s2pul

Solvent: cdc13

Temp. 25.0 C / 298.1 K

Operator: maw

File:

INOVA-400 "nrm1sun3"

Relax. delay 1.000 sec

Pulse 45.0 degrees

Acq. time 2.730 sec

Width 6000.6 Hz

16 repetitions

OBSERVE H1, 400.1083663 MHz

DATA PROCESSING

Line broadening 0.3 Hz

FT size 65536

Total time 0 min, 59 sec

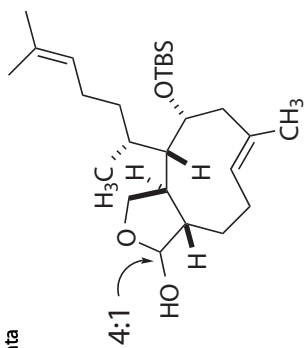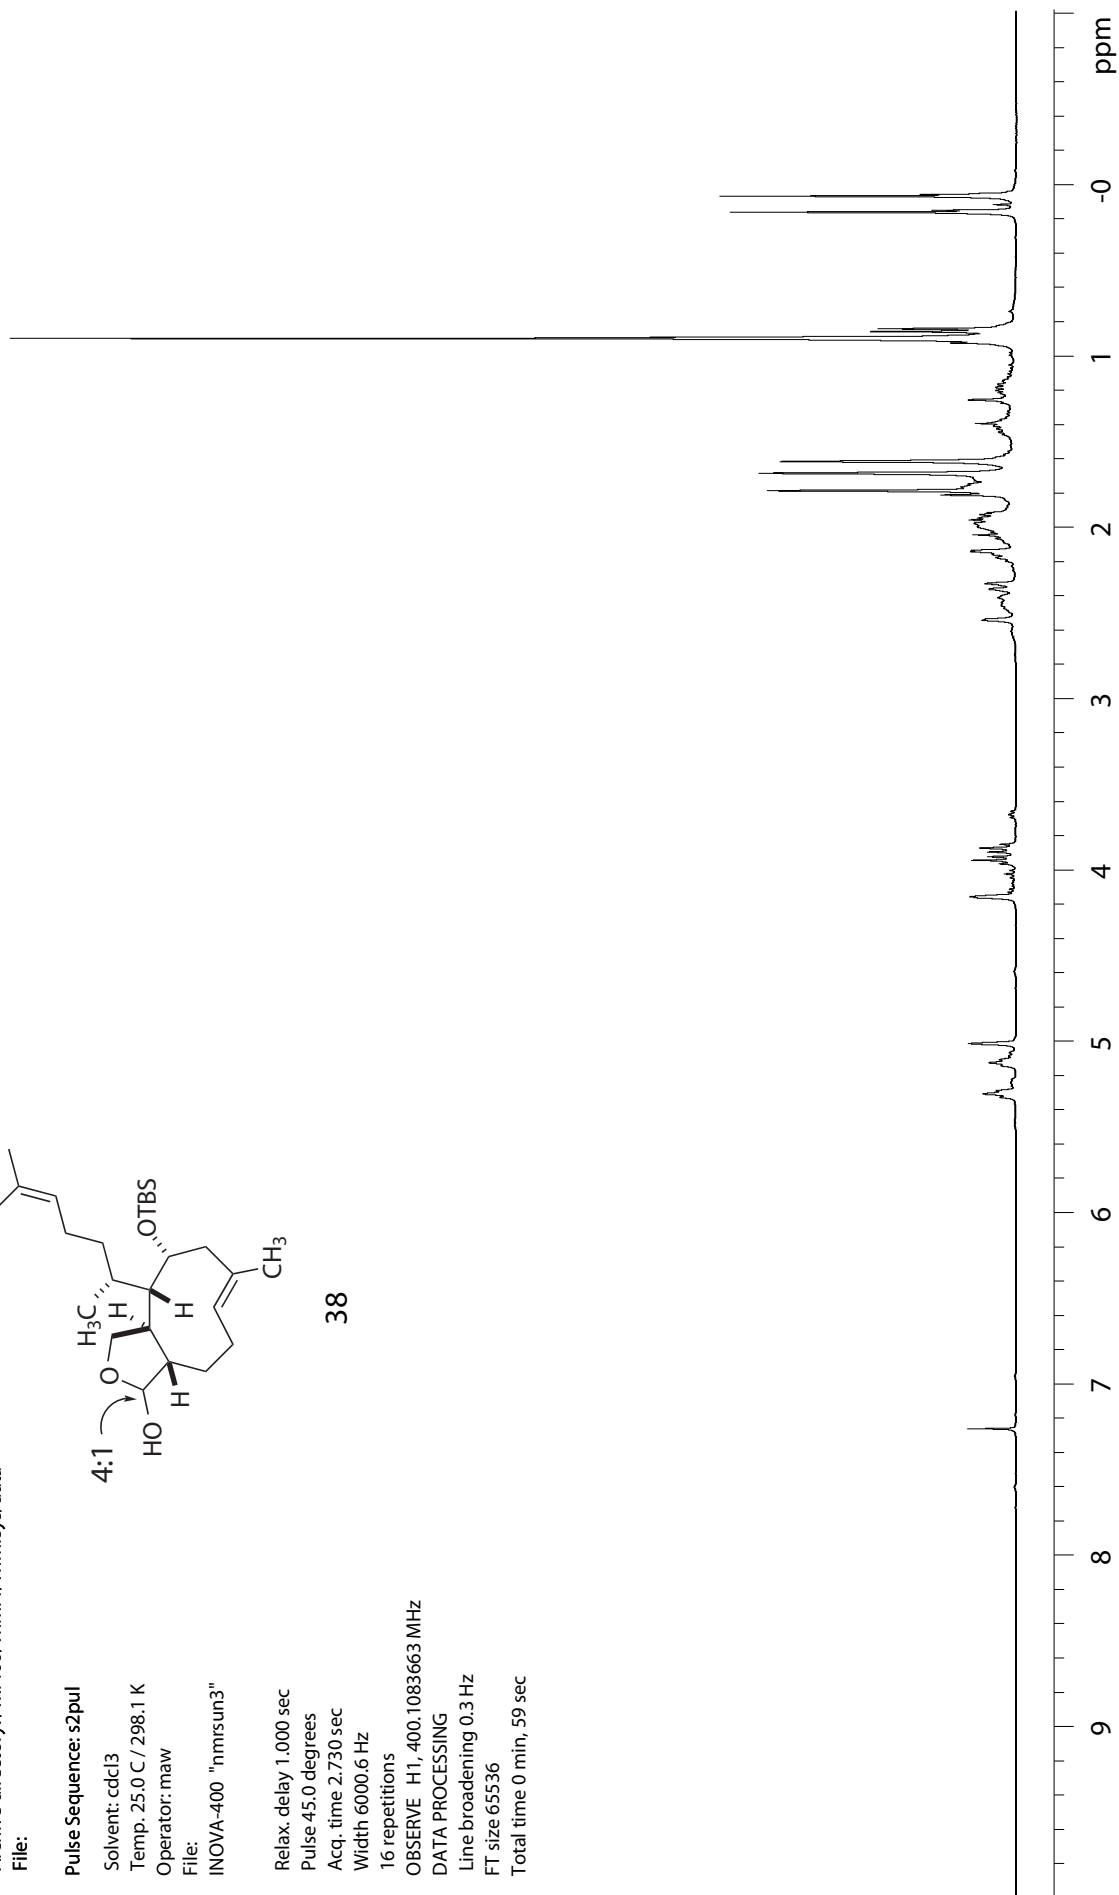



6-17-13C

Archive directory: /i400/dob/vnmrSYS/data  
File:

Pulse Sequence: s2pul

Solvent: CDCl3

Temp. 25.0 C / 298.1 K

Operator: maw

File:

INOVA-400 "nmrSun3"

Relax. delay 1.500 sec

Pulse 29.7 degrees

Acq. time 0.651 sec

Width 25157.2 Hz

1334 repetitions

OBSERVE C13, 100.6073289 MHz

DECOUPLE H1, 400.1103789 MHz

Power 43 dB

continuously on

WALTZ-16 modulated

DATA PROCESSING

Line broadening 2.0 Hz

FT size 65536

Total time 1 hr, 32 min, 9 sec

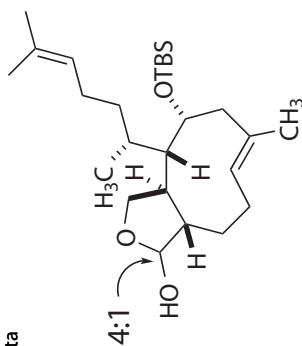

38

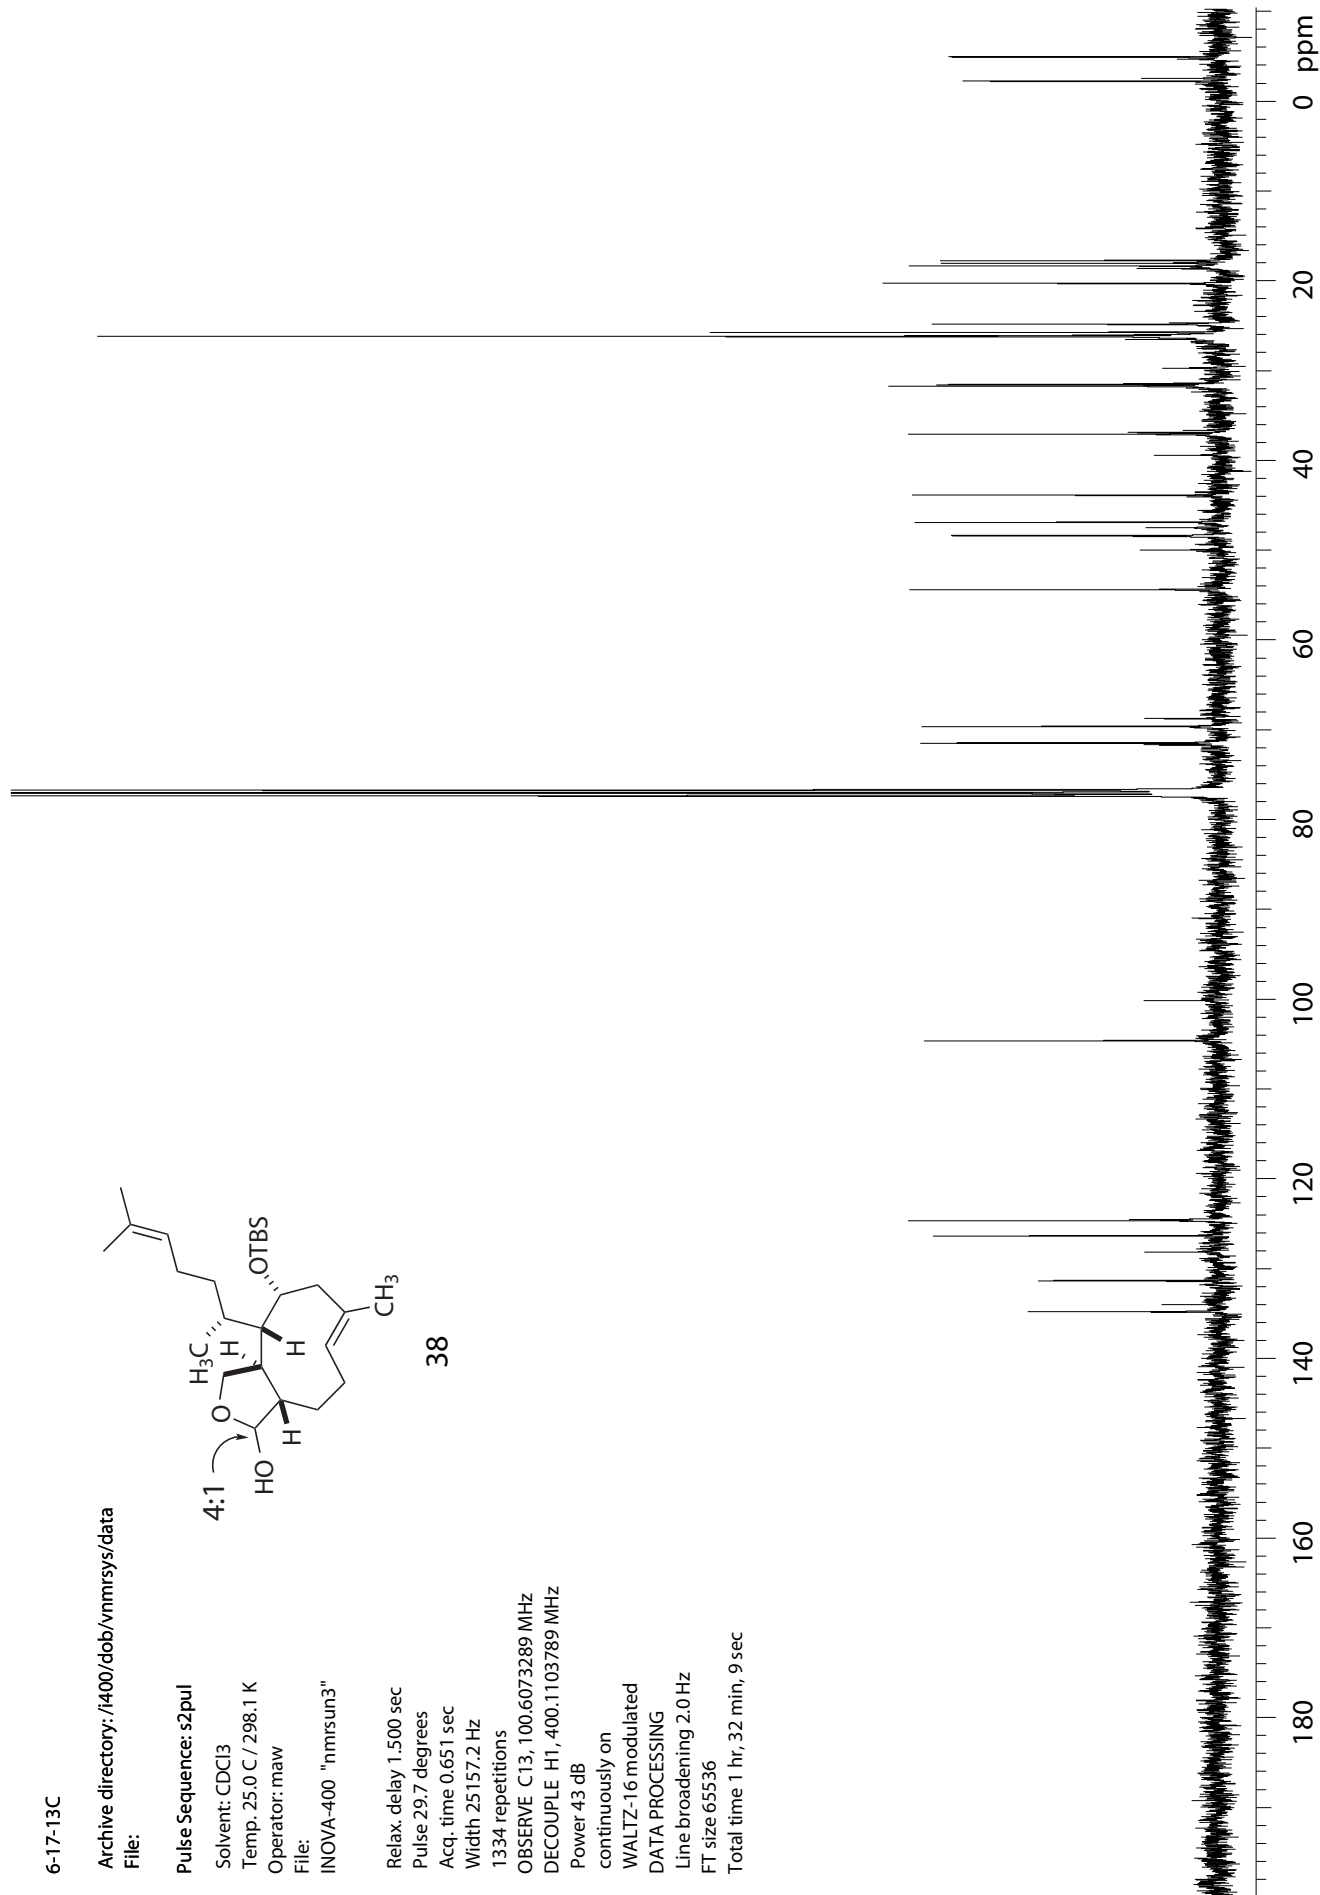

6-20-1H

Archive directory: /vxr400/vnmr1/vnmrsys/data  
File:

Pulse Sequence: s2pul

Solvent: cdcl3

Temp. 25.0 C / 298.1 K

Operator: maw

File:

INOVA-400 "nrmr3"

Relax. delay 1.000 sec

Pulse 45.0 degrees

Acq. time 2.730 sec

Width 6000.6 Hz

16 repetitions

OBSERVE H1, 400.1083663 MHz

DATA PROCESSING

Line broadening 0.3 Hz

FT size 65536

Total time 0 min, 59 sec

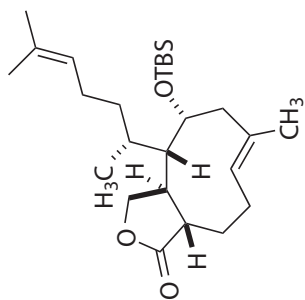

43

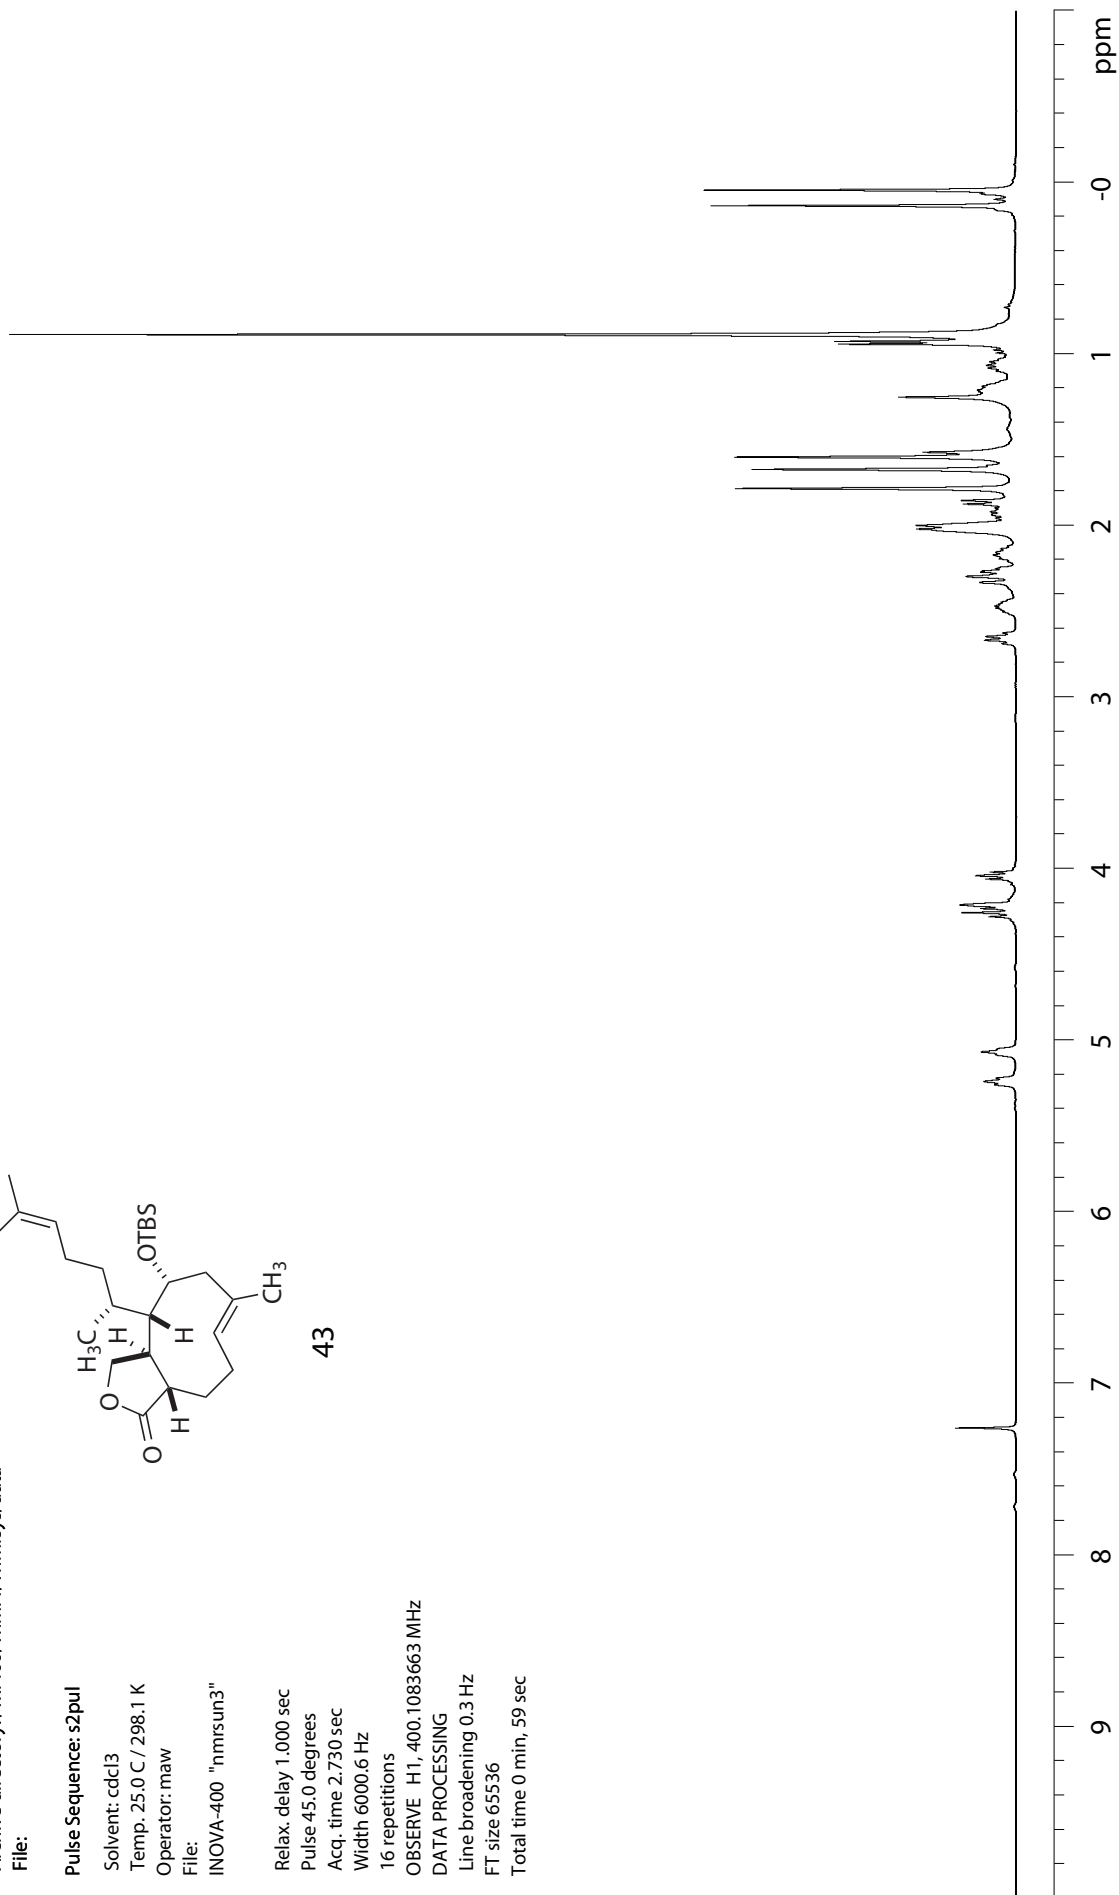

6-20-13C

Archive directory: /i400/dob/vnmrSYS/data

File:

Pulse Sequence: s2pul

Solvent: CDCl<sub>3</sub>

Temp. 25.0 C / 298.1 K

Operator: maw

File:

INOVA-400 "nrmrSun3"

Relax. delay 1.500 sec

Pulse 29.7 degrees

Acq. time 0.651 sec

Width 25157.2 Hz

2161 repetitions

OBSERVE C13, 100.6073289 MHz

DECOUPLE H1, 400.1103789 MHz

Power 43 dB

continuously on

WALTZ-16 modulated

DATA PROCESSING

Line broadening 2.0 Hz

FT size 65536

Total time 1 hr, 32 min, 9 sec

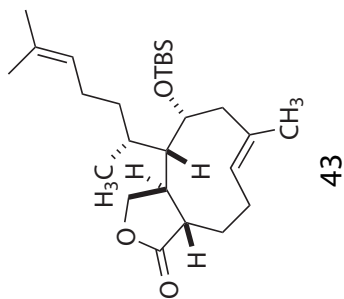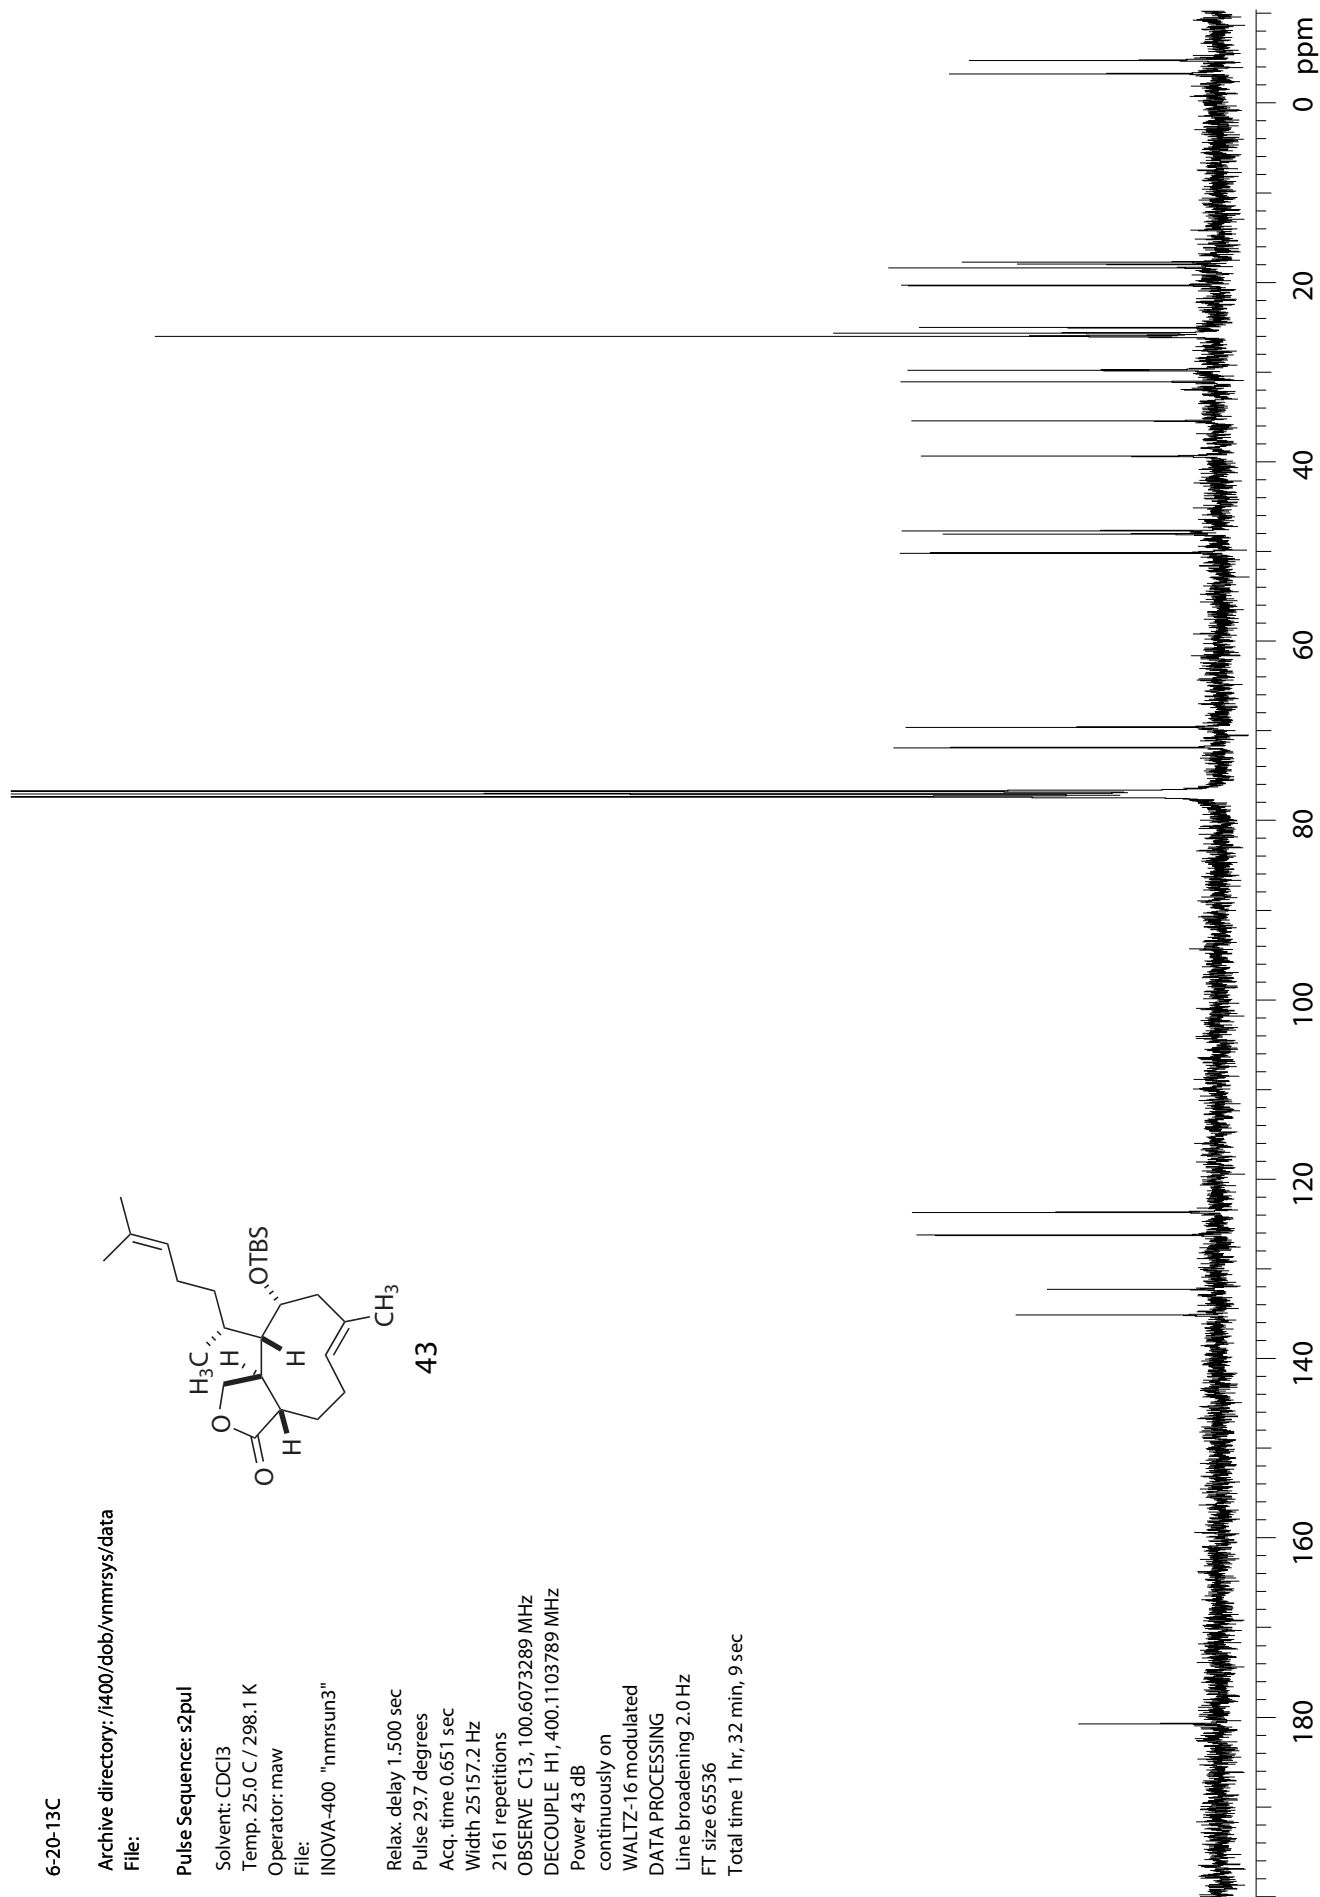

6-34-1H

Archive directory: /vxi400/vnmr1/vnmr1sys/data  
File: mjjw6\_34\_1H\_p2

Pulse Sequence: s2pul

Solvent: cdcl3  
Temp. 25.0 C / 298.1 K  
Operator: maw  
File: mjjw6\_34\_1H\_p2  
INOVA-400 "nmsun3"

Relax. delay 1.000 sec  
Pulse 45.0 degrees  
Acq. time 2.730 sec  
Width 6000.6 Hz  
16 repetitions  
OBSERVE H1, 400.1083663 MHz  
DATA PROCESSING  
Line broadening 0.3 Hz  
FT size 65536  
Total time 0 min, 59 sec

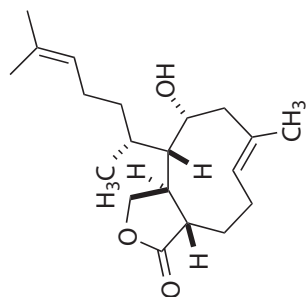

S19

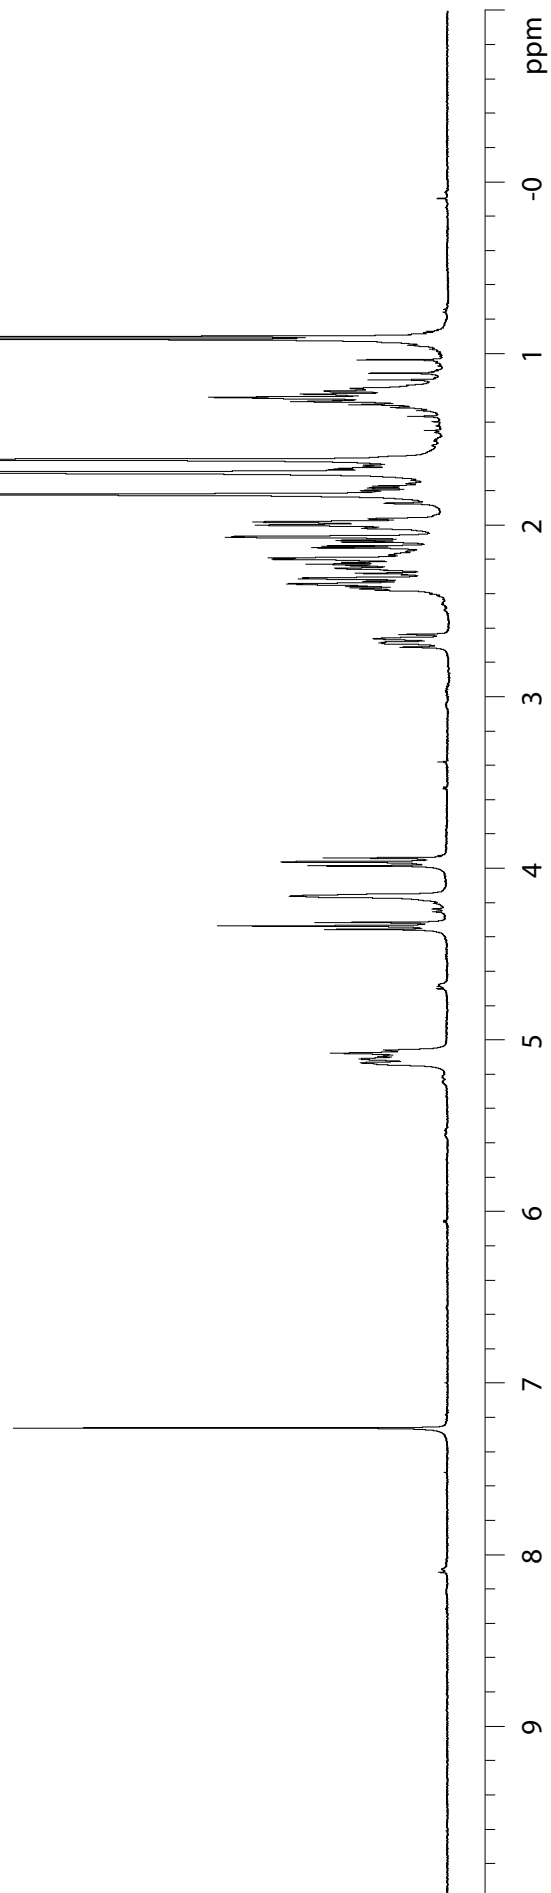

6-34-13C

Archive directory: /i400/dob/vnmrsys/data  
File: mjlw6\_34\_13C\_p

Pulse Sequence: s2pul

Solvent: CDCl<sub>3</sub>

Temp. 25.0 C / 298.1 K

Operator: maw

File: mjlw6\_34\_13C\_p

INOVA-400 "nmrsum3"

Relax. delay 1.500 sec

Pulse 29.7 degrees

Acq. time 0.651 sec

Width 25157.2 Hz

25600 repetitions

OBSERVE C13, 100.6073289 MHz

DECOUPLE H1, 400.1103789 MHz

Power 43 dB

continuously on

WALTZ-16 modulated

DATA PROCESSING

Line broadening 2.0 Hz

FT size 65536

Total time 15 hr, 21 min, 38 sec

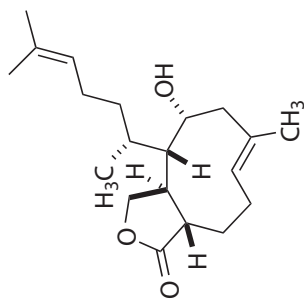

S19

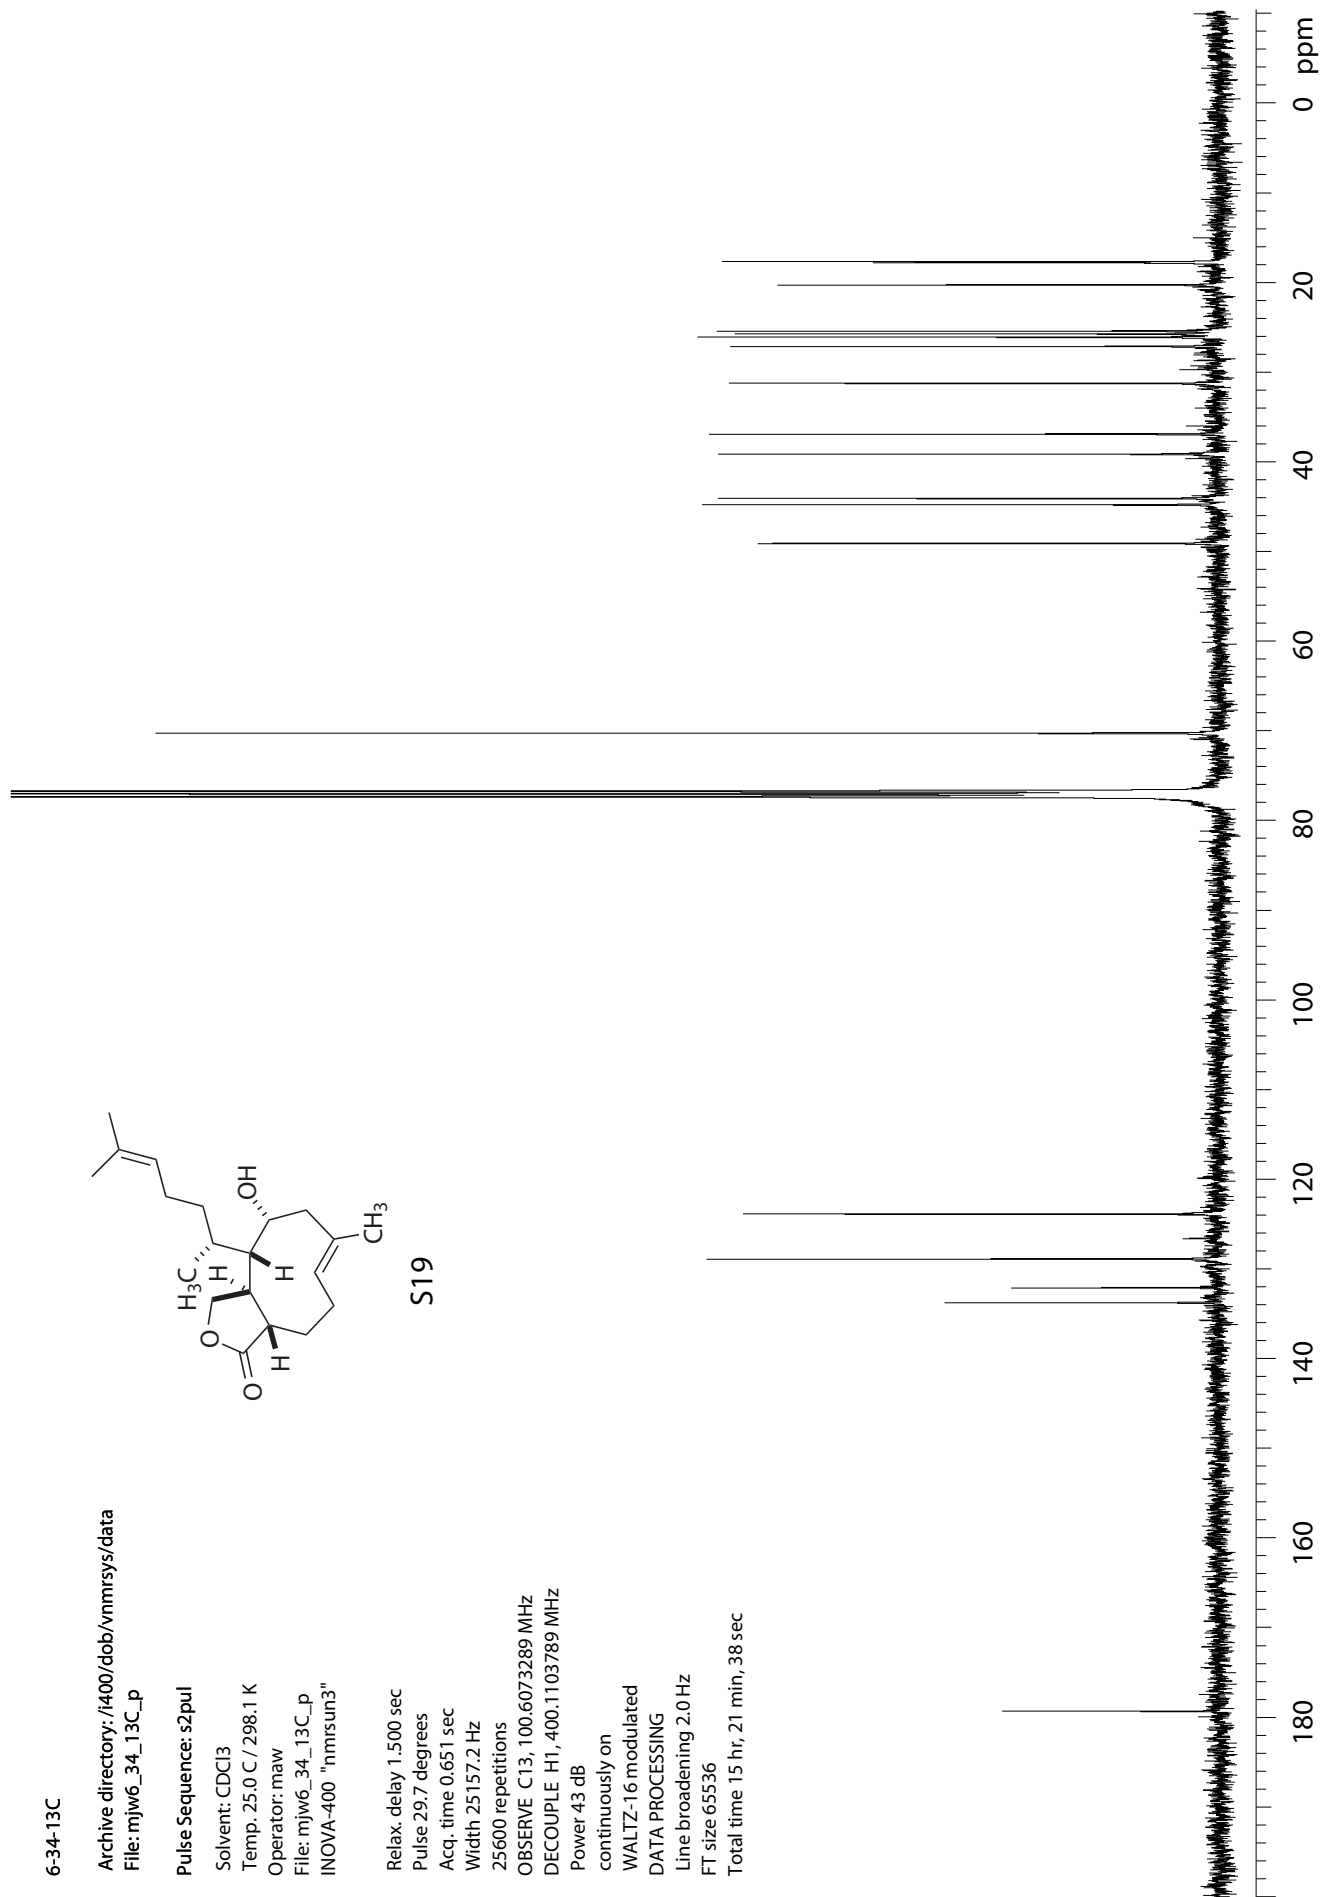

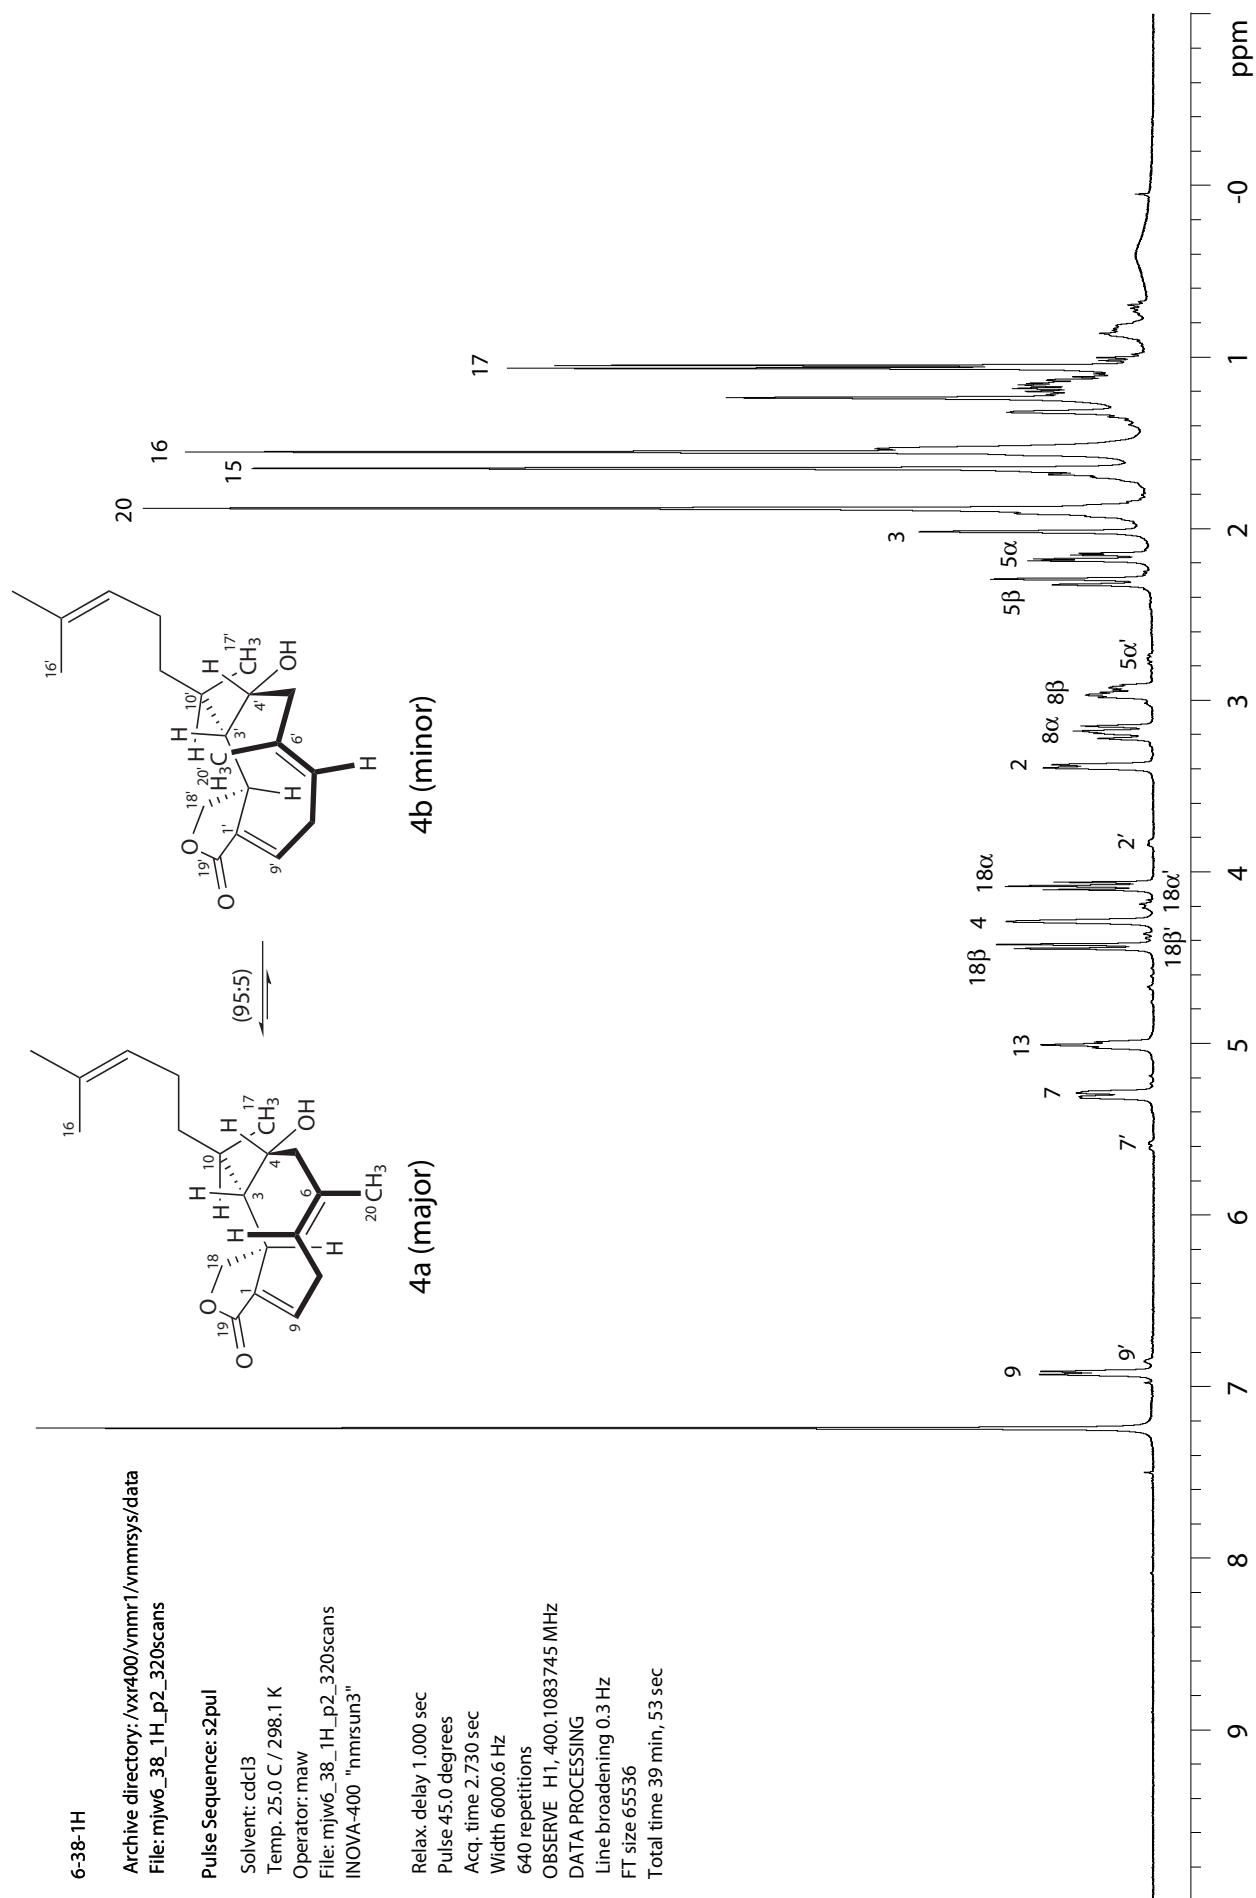

Supplement: NIHMS138393-supplement-1_si_001.pdf [file NIHMS138393-supplement-1_si_001.pdf]
